# Supplementary material for: ‘One Health’ Genomic Surveillance of Avian and Human Influenza A Viruses Through Environmental Wastewater Monitoring
Source: bioRxiv or medRxiv preprint supplement (doi:10.1101/2023.08.08.23293833), 2023-08-13
Supplement: Supplementary file [file media-1.pdf]

| Segment ID | Segment | Country            | Collection date | Isolate ID     | Isolate name                         | Originating Lab                                          | Submitting Lab                                           | Authors                                                                                                                                                                                                                                                                  |
|------------|---------|--------------------|-----------------|----------------|--------------------------------------|----------------------------------------------------------|----------------------------------------------------------|--------------------------------------------------------------------------------------------------------------------------------------------------------------------------------------------------------------------------------------------------------------------------|
| EP1218179  | NS      | China              | 2021-Oct-10     | EP_10_15052970 | A/gu/Shandong/W1505/2021             | College of Agronomy, Liaocheng University                | Liaocheng University                                     |                                                                                                                                                                                                                                                                          |
| EP1218178  | MP      | China              | 2021-Oct-10     | EP_10_15052970 | A/gu/Shandong/W1505/2021             | College of Agronomy, Liaocheng University                | Liaocheng University                                     |                                                                                                                                                                                                                                                                          |
| EP1218176  | NP      | China              | 2021-Oct-10     | EP_10_15052970 | A/gu/Shandong/W1505/2021             | College of Agronomy, Liaocheng University                | Liaocheng University                                     |                                                                                                                                                                                                                                                                          |
| EP1311576  | NP      | United States      | 2021-Aug-01     | EP_10_16641800 | A/gu/AK/21M00111/2021                | Itahn School of Medicine at Mount Sinai                  | Itahn School of Medicine at Mount Sinai                  | Hei, Nishio, Bishop, MaryAnne Puryear, Wendy Fox, Alexa Rumsdell, Jonathan van de Gucht, Adriano, Silvia Gonzalez-Rodriguez, Ana J. Khalil-Zein, van Bakel/Hern                                                                                                          |
| EP1311577  | NS      | United States      | 2021-Aug-01     | EP_10_16641800 | A/gu/AK/21M00111/2021                | Itahn School of Medicine at Mount Sinai                  | Itahn School of Medicine at Mount Sinai                  | Hei, Nishio, Bishop, MaryAnne Puryear, Wendy Fox, Alexa Rumsdell, Jonathan van de Gucht, Adriano, Silvia Gonzalez-Rodriguez, Ana J. Khalil-Zein, van Bakel/Hern                                                                                                          |
| EP1311578  | MP      | United States      | 2021-Aug-01     | EP_10_16641800 | A/gu/AK/21M00111/2021                | Itahn School of Medicine at Mount Sinai                  | Itahn School of Medicine at Mount Sinai                  | Hei, Nishio, Bishop, MaryAnne Puryear, Wendy Fox, Alexa Rumsdell, Jonathan van de Gucht, Adriano, Silvia Gonzalez-Rodriguez, Ana J. Khalil-Zein, van Bakel/Hern                                                                                                          |
| EP1823671  | NP      | Russian Federation | 2015-Sep-20     | EP_10_215640   | A/black-headed/gu/Kamchatka/007/2015 | Research Institute of Experimental and Clinical Medicine | Research Institute of Experimental and Clinical Medicine | Shurshov, K.A.; Sobolev, I.A.; Kabilov, M.R.; Shvestopalov, A.M.                                                                                                                                                                                                         |
| EP1823675  | MP      | Russian Federation | 2015-Sep-20     | EP_10_215640   | A/black-headed/gu/Kamchatka/007/2015 | Research Institute of Experimental and Clinical Medicine | Research Institute of Experimental and Clinical Medicine | Shurshov, K.A.; Sobolev, I.A.; Kabilov, M.R.; Shvestopalov, A.M.                                                                                                                                                                                                         |
| EP1823676  | NS      | Russian Federation | 2015-Sep-20     | EP_10_215640   | A/black-headed/gu/Kamchatka/007/2015 | Research Institute of Experimental and Clinical Medicine | Research Institute of Experimental and Clinical Medicine | Shurshov, K.A.; Sobolev, I.A.; Kabilov, M.R.; Shvestopalov, A.M.                                                                                                                                                                                                         |
| EP1498183  | NP      | United States      | 2017-Aug-30     | EP_10_17373344 | A/gu/USA_9_MNA13105/2017             | Import from public domain                                | Import from public domain                                | Rasmussen, E.A., Cuthbert, F.J., Tan, G.S., Lemay, P., Nelson, M.J., Cuthbert, M.R., Singh, V.                                                                                                                                                                           |
| EP1498189  | MP      | United States      | 2017-Aug-30     | EP_10_17373344 | A/gu/USA_9_MNA13105/2017             | Import from public domain                                | Import from public domain                                | Rasmussen, E.A., Cuthbert, F.J., Tan, G.S., Lemay, P., Nelson, M.J., Cuthbert, M.R., Singh, V.                                                                                                                                                                           |
| EP1498192  | NS      | United States      | 2017-Aug-30     | EP_10_17373344 | A/gu/USA_9_MNA13105/2017             | Import from public domain                                | Import from public domain                                | Rasmussen, E.A., Cuthbert, F.J., Tan, G.S., Lemay, P., Nelson, M.J., Cuthbert, M.R., Singh, V.                                                                                                                                                                           |
| EP1498182  | NP      | United States      | 2017-Aug-16     | EP_10_17373343 | A/gu/USA_9_MNA13172/2017             | Import from public domain                                | Import from public domain                                | Rasmussen, E.A., Cuthbert, F.J., Tan, G.S., Lemay, P., Nelson, M.J., Cuthbert, M.R., Singh, V.                                                                                                                                                                           |
| EP1498188  | MP      | United States      | 2017-Aug-16     | EP_10_17373343 | A/gu/USA_9_MNA13172/2017             | Import from public domain                                | Import from public domain                                | Rasmussen, E.A., Cuthbert, F.J., Tan, G.S., Lemay, P., Nelson, M.J., Cuthbert, M.R., Singh, V.                                                                                                                                                                           |
| EP1498191  | NS      | United States      | 2017-Aug-16     | EP_10_17373343 | A/gu/USA_9_MNA13172/2017             | Import from public domain                                | Import from public domain                                | Rasmussen, E.A., Cuthbert, F.J., Tan, G.S., Lemay, P., Nelson, M.J., Cuthbert, M.R., Singh, V.                                                                                                                                                                           |
| EP1498181  | NP      | United States      | 2017-Aug-15     | EP_10_17373342 | A/gu/USA_7_MNA13144/2017             | Import from public domain                                | Import from public domain                                | Rasmussen, E.A., Cuthbert, F.J., Tan, G.S., Lemay, P., Nelson, M.J., Cuthbert, M.R., Singh, V.                                                                                                                                                                           |
| EP1498187  | MP      | United States      | 2017-Aug-15     | EP_10_17373342 | A/gu/USA_7_MNA13144/2017             | Import from public domain                                | Import from public domain                                | Rasmussen, E.A., Cuthbert, F.J., Tan, G.S., Lemay, P., Nelson, M.J., Cuthbert, M.R., Singh, V.                                                                                                                                                                           |
| EP1498190  | NS      | United States      | 2017-Aug-15     | EP_10_17373342 | A/gu/USA_7_MNA13144/2017             | Import from public domain                                | Import from public domain                                | Rasmussen, E.A., Cuthbert, F.J., Tan, G.S., Lemay, P., Nelson, M.J., Cuthbert, M.R., Singh, V.                                                                                                                                                                           |
| EP1305481  | MP      | United States      | 2015-May-24     | EP_10_328622   | A/gu/New Jersey/UGA115-3767/2015     | Import from public domain                                | Import from public domain                                | Tan, G., Pickett, B., Fedorova, N., Amedeo, P., Hull, C., Christensen, J., Miller, J., Durbin, A., Williams, T., Poulos, R., Skallneach, D.                                                                                                                              |
| EP1305483  | NP      | United States      | 2015-May-24     | EP_10_328622   | A/gu/New Jersey/UGA115-3767/2015     | Import from public domain                                | Import from public domain                                | Tan, G., Pickett, B., Fedorova, N., Amedeo, P., Hull, C., Christensen, J., Miller, J., Durbin, A., Williams, T., Poulos, R., Skallneach, D.                                                                                                                              |
| EP1305484  | NS      | United States      | 2015-May-24     | EP_10_328622   | A/gu/New Jersey/UGA115-3767/2015     | Import from public domain                                | Import from public domain                                | Tan, G., Pickett, B., Fedorova, N., Amedeo, P., Hull, C., Christensen, J., Miller, J., Durbin, A., Williams, T., Poulos, R., Skallneach, D.                                                                                                                              |
| EP1305473  | MP      | United States      | 2015-May-24     | EP_10_328621   | A/gu/New Jersey/UGA115-3758/2015     | Import from public domain                                | Import from public domain                                | Tan, G., Pickett, B., Fedorova, N., Amedeo, P., Hull, C., Christensen, J., Miller, J., Durbin, A., Williams, T., Poulos, R., Skallneach, D.                                                                                                                              |
| EP1305475  | NP      | United States      | 2015-May-24     | EP_10_328621   | A/gu/New Jersey/UGA115-3758/2015     | Import from public domain                                | Import from public domain                                | Tan, G., Pickett, B., Fedorova, N., Amedeo, P., Hull, C., Christensen, J., Miller, J., Durbin, A., Williams, T., Poulos, R., Skallneach, D.                                                                                                                              |
| EP1305476  | NS      | United States      | 2015-May-24     | EP_10_328621   | A/gu/New Jersey/UGA115-3758/2015     | Import from public domain                                | Import from public domain                                | Tan, G., Pickett, B., Fedorova, N., Amedeo, P., Hull, C., Christensen, J., Miller, J., Durbin, A., Williams, T., Poulos, R., Skallneach, D.                                                                                                                              |
| EP1305465  | MP      | United States      | 2015-May-20     | EP_10_328620   | A/gu/New Jersey/UGA115-3459/2015     | Import from public domain                                | Import from public domain                                | Tan, G., Pickett, B., Fedorova, N., Amedeo, P., Hull, C., Christensen, J., Miller, J., Durbin, A., Williams, T., Poulos, R., Skallneach, D.                                                                                                                              |
| EP1305467  | NP      | United States      | 2015-May-20     | EP_10_328620   | A/gu/New Jersey/UGA115-3459/2015     | Import from public domain                                | Import from public domain                                | Tan, G., Pickett, B., Fedorova, N., Amedeo, P., Hull, C., Christensen, J., Miller, J., Durbin, A., Williams, T., Poulos, R., Skallneach, D.                                                                                                                              |
| EP1305468  | NS      | United States      | 2015-May-20     | EP_10_328620   | A/gu/New Jersey/UGA115-3459/2015     | Import from public domain                                | Import from public domain                                | Tan, G., Pickett, B., Fedorova, N., Amedeo, P., Hull, C., Christensen, J., Miller, J., Durbin, A., Williams, T., Poulos, R., Skallneach, D.                                                                                                                              |
| EP1305457  | MP      | United States      | 2015-May-20     | EP_10_328619   | A/gu/New Jersey/UGA115-3416/2015     | Import from public domain                                | Import from public domain                                | Tan, G., Pickett, B., Fedorova, N., Amedeo, P., Hull, C., Christensen, J., Miller, J., Durbin, A., Williams, T., Poulos, R., Skallneach, D.                                                                                                                              |
| EP1305459  | NP      | United States      | 2015-May-20     | EP_10_328619   | A/gu/New Jersey/UGA115-3416/2015     | Import from public domain                                | Import from public domain                                | Tan, G., Pickett, B., Fedorova, N., Amedeo, P., Hull, C., Christensen, J., Miller, J., Durbin, A., Williams, T., Poulos, R., Skallneach, D.                                                                                                                              |
| EP1305460  | NS      | United States      | 2015-May-20     | EP_10_328619   | A/gu/New Jersey/UGA115-3416/2015     | Import from public domain                                | Import from public domain                                | Tan, G., Pickett, B., Fedorova, N., Amedeo, P., Hull, C., Christensen, J., Miller, J., Durbin, A., Williams, T., Poulos, R., Skallneach, D.                                                                                                                              |
| EP1305449  | MP      | United States      | 2015-May-20     | EP_10_328618   | A/gu/New Jersey/UGA115-3414/2015     | Import from public domain                                | Import from public domain                                | Tan, G., Pickett, B., Fedorova, N., Amedeo, P., Hull, C., Christensen, J., Miller, J., Durbin, A., Williams, T., Poulos, R., Skallneach, D.                                                                                                                              |
| EP1305451  | NP      | United States      | 2015-May-20     | EP_10_328618   | A/gu/New Jersey/UGA115-3414/2015     | Import from public domain                                | Import from public domain                                | Tan, G., Pickett, B., Fedorova, N., Amedeo, P., Hull, C., Christensen, J., Miller, J., Durbin, A., Williams, T., Poulos, R., Skallneach, D.                                                                                                                              |
| EP1305452  | NS      | United States      | 2015-May-20     | EP_10_328618   | A/gu/New Jersey/UGA115-3414/2015     | Import from public domain                                | Import from public domain                                | Tan, G., Pickett, B., Fedorova, N., Amedeo, P., Hull, C., Christensen, J., Miller, J., Durbin, A., Williams, T., Poulos, R., Skallneach, D.                                                                                                                              |
| EP1695167  | MP      | United States      | 2013-Jul-03     | EP_10_208103   | A/gu/Massachusetts/13R00330/2013     | Import from public domain                                | Import from public domain                                | Das, S.R.; Hight, R.A.; Liu, X.; Simerauer, A.; Alloggia, A.; Fedorova, N.; Pan, V.; Stockwell, T.; Amedeo, P.; Katal, D.; Schibali, S.; Shrivastava, S.; HE, N.; Puryear, W.; Bao, Y.; Sanders, R.; Zhdanov, S.; Krynitskiy, B.; Iqbal, O.J.; Takemura, T.; Rumbaer, J. |

|            |    |               |             |              |                                                           |                                     |                                                                                                                                                                                                                                                        |
|------------|----|---------------|-------------|--------------|-----------------------------------------------------------|-------------------------------------|--------------------------------------------------------------------------------------------------------------------------------------------------------------------------------------------------------------------------------------------------------|
| EP099569   | NP | United States | 2013-Jul-03 | EP_10_208103 | A/gull/Massachusetts/13R0330/2013                         | Import from public domain           | Dai,S.R.; Halpin,R.A.; Lin,X.; Smerauer,A.; Akopov,A.; Fedorova,N.; Pur,V.; Stockwell,T.; Amadio,F.; Katal,D.; Schibler,S.; Shrivastava,S.; HE,N.; Puryear,W.; Bao,Y.; Sanders,B.; Zhdanov,S.; Kravtch,B.; Iqman,D.I.; Takusawa,T.; Runstadler,J.      |
| EP099570   | NS | United States | 2013-Jul-03 | EP_10_208103 | A/gull/Massachusetts/13R0330/2013                         | Import from public domain           | Dai,S.R.; Halpin,R.A.; Lin,X.; Smerauer,A.; Akopov,A.; Fedorova,N.; Pur,V.; Stockwell,T.; Amadio,F.; Katal,D.; Schibler,S.; Shrivastava,S.; HE,N.; Puryear,W.; Bao,Y.; Sanders,B.; Zhdanov,S.; Kravtch,B.; Iqman,D.I.; Takusawa,T.; Runstadler,J.      |
| EP1057458  | MP | United States | 2014-Sep-03 | EP_10_277379 | A/glaucous-winged.gull/Southcentral Alaska/24MB02094/2014 | Import from public domain           | Pickett,B.; Tack,D.; Fedorova,N.; Pur,V.; Shrivastava,S.; Amadio,F.; Ikon,N.; Hu,L.; Christman,J.; Nevoity,M.; Durbin,A.; Rasch,J.; Williams,T.; HE,N.; Bao,Y.; Sanders,B.; Zhdanov,S.; Kravtch,B.; Iqman,D.I.; Takusawa,T.; Hatcher,Z.; Runstadler,J. |
| EP1057589  | NP | United States | 2014-Sep-03 | EP_10_277379 | A/glaucous-winged.gull/Southcentral Alaska/24MB02094/2014 | Import from public domain           | Pickett,B.; Tack,D.; Fedorova,N.; Pur,V.; Shrivastava,S.; Amadio,F.; Ikon,N.; Hu,L.; Christman,J.; Nevoity,M.; Durbin,A.; Rasch,J.; Williams,T.; HE,N.; Bao,Y.; Sanders,B.; Zhdanov,S.; Kravtch,B.; Iqman,D.I.; Takusawa,T.; Hatcher,Z.; Runstadler,J. |
| EP1057590  | NS | United States | 2014-Sep-03 | EP_10_277379 | A/glaucous-winged.gull/Southcentral Alaska/24MB02094/2014 | Import from public domain           | Pickett,B.; Tack,D.; Fedorova,N.; Pur,V.; Shrivastava,S.; Amadio,F.; Ikon,N.; Hu,L.; Christman,J.; Nevoity,M.; Durbin,A.; Rasch,J.; Williams,T.; HE,N.; Bao,Y.; Sanders,B.; Zhdanov,S.; Kravtch,B.; Iqman,D.I.; Takusawa,T.; Hatcher,Z.; Runstadler,J. |
| EP11353400 | NP | Mongolia      | 2017-May-31 | EP_10_317414 | A/herring.gull/Uvs-Nuur Lake/06/2017                      | National Institute of Animal Health | Yoshida,E.                                                                                                                                                                                                                                             |
| EP11353410 | NS | Mongolia      | 2017-May-31 | EP_10_317414 | A/herring.gull/Uvs-Nuur Lake/06/2017                      | National Institute of Animal Health | Yoshida,E.                                                                                                                                                                                                                                             |
| EP11353411 | MP | Mongolia      | 2017-May-31 | EP_10_317414 | A/herring.gull/Uvs-Nuur Lake/06/2017                      | National Institute of Animal Health | Yoshida,E.                                                                                                                                                                                                                                             |
| EP1174601  | MP | Belgium       | 2016-Oct-28 | EP_10_395971 | A/Larus argentatus/Belgium/U1610336_1907447/2016          | Import from public domain           | Sternals,M.; Lambrecht,B.                                                                                                                                                                                                                              |
| EP1174604  | NS | Belgium       | 2016-Oct-28 | EP_10_395971 | A/Larus argentatus/Belgium/U1610336_1907447/2016          | Import from public domain           | Sternals,M.; Lambrecht,B.                                                                                                                                                                                                                              |
| EP1174603  | NP | Belgium       | 2016-Oct-28 | EP_10_395971 | A/Larus argentatus/Belgium/U1610336_1907447/2016          | Import from public domain           | Sternals,M.; Lambrecht,B.                                                                                                                                                                                                                              |
| EP11307100 | NP | Netherlands   | 2015-Nov-26 | EP_10_328987 | A/European herring.gull/Netherlands/1/2015                | Import from public domain           | Paan,M.J.; Verhagen,J.H.; Vuong,D.; Scheer,B.D.; Paas,D.; Feather,B.A.M.                                                                                                                                                                               |
| EP11307162 | MP | Netherlands   | 2015-Nov-26 | EP_10_328987 | A/European herring.gull/Netherlands/1/2015                | Import from public domain           | Paan,M.J.; Verhagen,J.H.; Vuong,D.; Scheer,B.D.; Paas,D.; Feather,B.A.M.                                                                                                                                                                               |
| EP11307176 | NS | Netherlands   | 2015-Nov-26 | EP_10_328987 | A/European herring.gull/Netherlands/1/2015                | Import from public domain           | Paan,M.J.; Verhagen,J.H.; Vuong,D.; Scheer,B.D.; Paas,D.; Feather,B.A.M.                                                                                                                                                                               |
| EP1011048  | NP | Netherlands   | 2014-Dec-24 | EP_10_267302 | A/European herring.gull/Netherlands/2/2014                | Import from public domain           |                                                                                                                                                                                                                                                        |
| EP1011419  | NS | Netherlands   | 2014-Dec-24 | EP_10_267302 | A/European herring.gull/Netherlands/2/2014                | Import from public domain           |                                                                                                                                                                                                                                                        |
| EP1014955  | MP | Netherlands   | 2014-Dec-24 | EP_10_267302 | A/European herring.gull/Netherlands/2/2014                | Import from public domain           |                                                                                                                                                                                                                                                        |
| EP1547112  | NP | United States | 2013-Sep-03 | EP_10_166438 | A/herring.gull/Maine/NC0000047/2013                       | Import from public domain           | Srivett,D.R.; Pedersen,K.; Killam,M.L.                                                                                                                                                                                                                 |
| EP1547114  | MP | United States | 2013-Sep-03 | EP_10_166438 | A/herring.gull/Maine/NC0000047/2013                       | Import from public domain           | Srivett,D.R.; Pedersen,K.; Killam,M.L.                                                                                                                                                                                                                 |
| EP1547116  | NS | United States | 2013-Sep-03 | EP_10_166438 | A/herring.gull/Maine/NC0000047/2013                       | Import from public domain           | Srivett,D.R.; Pedersen,K.; Killam,M.L.                                                                                                                                                                                                                 |
| EP11233761 | NP | China         | 2016-Dec-28 | EP_10_308785 | A/black-tailed.gull/Waha/17/2016                          | Import from public domain           | Yu,Z.; Cheng,K.                                                                                                                                                                                                                                        |
| EP11233763 | MP | China         | 2016-Dec-28 | EP_10_308785 | A/black-tailed.gull/Waha/17/2016                          | Import from public domain           | Yu,Z.; Cheng,K.                                                                                                                                                                                                                                        |
| EP11233764 | NS | China         | 2016-Dec-28 | EP_10_308785 | A/black-tailed.gull/Waha/17/2016                          | Import from public domain           | Yu,Z.; Cheng,K.                                                                                                                                                                                                                                        |
| EP11233774 | NP | China         | 2016-Dec-28 | EP_10_308784 | A/black-tailed.gull/Waha/115/2016                         | Import from public domain           | Yu,Z.; Cheng,K.                                                                                                                                                                                                                                        |
| EP11233776 | MP | China         | 2016-Dec-28 | EP_10_308784 | A/black-tailed.gull/Waha/115/2016                         | Import from public domain           | Yu,Z.; Cheng,K.                                                                                                                                                                                                                                        |
| EP11233777 | NS | China         | 2016-Dec-28 | EP_10_308784 | A/black-tailed.gull/Waha/115/2016                         | Import from public domain           | Yu,Z.; Cheng,K.                                                                                                                                                                                                                                        |
| EP099203   | NP | United States | 2013-Dec-19 | EP_10_208108 | A/ring-billed.gull/Massachusetts/13DC30736-1/2013         | Import from public domain           | Dai,S.R.; Halpin,R.A.; Lin,X.; Smerauer,A.; Akopov,A.; Fedorova,N.; Pur,V.; Stockwell,T.; Amadio,F.; Katal,D.; Schibler,S.; Shrivastava,S.; HE,N.; Puryear,W.; Bao,Y.; Sanders,B.; Zhdanov,S.; Kravtch,B.; Iqman,D.I.; Takusawa,T.; Runstadler,J.      |
| EP099204   | NS | United States | 2013-Dec-19 | EP_10_208108 | A/ring-billed.gull/Massachusetts/13DC30736-2/2013         | Import from public domain           | Dai,S.R.; Halpin,R.A.; Lin,X.; Smerauer,A.; Akopov,A.; Fedorova,N.; Pur,V.; Stockwell,T.; Amadio,F.; Katal,D.; Schibler,S.; Shrivastava,S.; HE,N.; Puryear,W.; Bao,Y.; Sanders,B.; Zhdanov,S.; Kravtch,B.; Iqman,D.I.; Takusawa,T.; Runstadler,J.      |
| EP099203   | MP | United States | 2013-Dec-19 | EP_10_208108 | A/ring-billed.gull/Massachusetts/13DC30736-3/2013         | Import from public domain           | Dai,S.R.; Halpin,R.A.; Lin,X.; Smerauer,A.; Akopov,A.; Fedorova,N.; Pur,V.; Stockwell,T.; Amadio,F.; Katal,D.; Schibler,S.; Shrivastava,S.; HE,N.; Puryear,W.; Bao,Y.; Sanders,B.; Zhdanov,S.; Kravtch,B.; Iqman,D.I.; Takusawa,T.; Runstadler,J.      |
| EP099594   | MP | United States | 2013-Dec-19 | EP_10_208107 | A/ring-billed.gull/Massachusetts/13DC30736-1/2013         | Import from public domain           | Dai,S.R.; Halpin,R.A.; Lin,X.; Smerauer,A.; Akopov,A.; Fedorova,N.; Pur,V.; Stockwell,T.; Amadio,F.; Katal,D.; Schibler,S.; Shrivastava,S.; HE,N.; Puryear,W.; Bao,Y.; Sanders,B.; Zhdanov,S.; Kravtch,B.; Iqman,D.I.; Takusawa,T.; Runstadler,J.      |
| EP099596   | NP | United States | 2013-Dec-19 | EP_10_208107 | A/ring-billed.gull/Massachusetts/13DC30736-1/2013         | Import from public domain           | Dai,S.R.; Halpin,R.A.; Lin,X.; Smerauer,A.; Akopov,A.; Fedorova,N.; Pur,V.; Stockwell,T.; Amadio,F.; Katal,D.; Schibler,S.; Shrivastava,S.; HE,N.; Puryear,W.; Bao,Y.; Sanders,B.; Zhdanov,S.; Kravtch,B.; Iqman,D.I.; Takusawa,T.; Runstadler,J.      |
| EP099207   | NS | United States | 2013-Dec-19 | EP_10_208107 | A/ring-billed.gull/Massachusetts/13DC30736-2/2013         | Import from public domain           | Dai,S.R.; Halpin,R.A.; Lin,X.; Smerauer,A.; Akopov,A.; Fedorova,N.; Pur,V.; Stockwell,T.; Amadio,F.; Katal,D.; Schibler,S.; Shrivastava,S.; HE,N.; Puryear,W.; Bao,Y.; Sanders,B.; Zhdanov,S.; Kravtch,B.; Iqman,D.I.; Takusawa,T.; Runstadler,J.      |
| EP11301196 | NP | Chile         | 2016-Dec-13 | EP_10_327809 | A/lepb.gull/Chile/C20117/2016                             | Import from public domain           | Bravo-Vasquez,N.; Bahf,J.; Hamilton-Wahl,C.; Schultz-Cherry,S.                                                                                                                                                                                         |
| EP11301198 | MP | Chile         | 2016-Dec-13 | EP_10_327809 | A/lepb.gull/Chile/C20117/2016                             | Import from public domain           | Bravo-Vasquez,N.; Bahf,J.; Hamilton-Wahl,C.; Schultz-Cherry,S.                                                                                                                                                                                         |
| EP11301200 | NS | Chile         | 2016-Dec-13 | EP_10_327809 | A/lepb.gull/Chile/C20117/2016                             | Import from public domain           | Bravo-Vasquez,N.; Bahf,J.; Hamilton-Wahl,C.; Schultz-Cherry,S.                                                                                                                                                                                         |



|           |    |               |             |              |                                               |                           |                                                                           |
|-----------|----|---------------|-------------|--------------|-----------------------------------------------|---------------------------|---------------------------------------------------------------------------|
| EP128603  | NS | Chile         | 2016-Apr-27 | EP_13_128601 | A/Ank/gal/China/C10326/2016                   | Import from public domain | Jensen-Blahm,P., Hamblen,C., van Bekel,H.; RHLD; Schultz-Cherry,S.        |
| EP128640  | MP | Chile         | 2016-Apr-27 | EP_13_128659 | A/Ank/gal/China/C10779/2016                   | Import from public domain | Jensen-Blahm,P., Hamblen,C., van Bekel,H.; RHLD; Schultz-Cherry,S.        |
| EP128651  | NP | Chile         | 2016-Apr-27 | EP_13_128659 | A/Ank/gal/China/C10779/2016                   | Import from public domain | Jensen-Blahm,P., Hamblen,C., van Bekel,H.; RHLD; Schultz-Cherry,S.        |
| EP128600  | NS | Chile         | 2016-Apr-27 | EP_13_128659 | A/Ank/gal/China/C10779/2016                   | Import from public domain | Jensen-Blahm,P., Hamblen,C., van Bekel,H.; RHLD; Schultz-Cherry,S.        |
| EP1530530 | MP | United States | 2018-May-22 | EP_13_173078 | A/Ank/gal/Delaware Bay/441/2018               | Import from public domain | Woodard,K.; Turner,J.C.; Frank,J.; Friedman,K.; Kercher,L.; Webby,R.I.    |
| EP1530531 | NS | United States | 2018-May-22 | EP_13_173078 | A/Ank/gal/Delaware Bay/441/2018               | Import from public domain | Woodard,K.; Turner,J.C.; Frank,J.; Friedman,K.; Kercher,L.; Webby,R.I.    |
| EP1530533 | NP | United States | 2018-May-22 | EP_13_173078 | A/Ank/gal/Delaware Bay/441/2018               | Import from public domain | Woodard,K.; Turner,J.C.; Frank,J.; Friedman,K.; Kercher,L.; Webby,R.I.    |
| EP1307007 | MP | Netherlands   | 2015-Sep-18 | EP_13_128974 | A/Anker black-backed gal/Netherlands/1/2015   | Import from public domain | Poon,M.J.; Verhagen,L.H.; Voong,D.; Shawar,R.D.; Paas,S.; Fouchier,B.A.M. |
| EP1307001 | NP | Netherlands   | 2015-Sep-18 | EP_13_128974 | A/Anker black-backed gal/Netherlands/1/2015   | Import from public domain | Poon,M.J.; Verhagen,L.H.; Voong,D.; Shawar,R.D.; Paas,S.; Fouchier,B.A.M. |
| EP1307002 | NS | Netherlands   | 2015-Sep-18 | EP_13_128974 | A/Anker black-backed gal/Netherlands/1/2015   | Import from public domain | Poon,M.J.; Verhagen,L.H.; Voong,D.; Shawar,R.D.; Paas,S.; Fouchier,B.A.M. |
| EP1075122 | NP | United States | 2020-Sep-04 | EP_13_989576 | A/Glaucous-Winged Gull/Alaska/20MB020320/2020 | Import from public domain | HE,N.; Runstadler,J.                                                      |
| EP1075123 | NS | United States | 2020-Sep-04 | EP_13_989576 | A/Glaucous-Winged Gull/Alaska/20MB020320/2020 | Import from public domain | HE,N.; Runstadler,J.                                                      |
| EP1075126 | MP | United States | 2020-Sep-04 | EP_13_989576 | A/Glaucous-Winged Gull/Alaska/20MB020320/2020 | Import from public domain | HE,N.; Runstadler,J.                                                      |
| EP1075114 | MP | United States | 2020-Sep-04 | EP_13_989575 | A/Glaucous-Winged Gull/Alaska/20MB020316/2020 | Import from public domain | HE,N.; Runstadler,J.                                                      |
| EP1075118 | NS | United States | 2020-Sep-04 | EP_13_989575 | A/Glaucous-Winged Gull/Alaska/20MB020316/2020 | Import from public domain | HE,N.; Runstadler,J.                                                      |
| EP1075120 | NP | United States | 2020-Sep-04 | EP_13_989575 | A/Glaucous-Winged Gull/Alaska/20MB020316/2020 | Import from public domain | HE,N.; Runstadler,J.                                                      |
| EP1075108 | NP | United States | 2020-Aug-10 | EP_13_989574 | A/Glaucous-Winged Gull/Alaska/20MB020516/2020 | Import from public domain | HE,N.; Runstadler,J.                                                      |
| EP1075110 | NS | United States | 2020-Aug-10 | EP_13_989574 | A/Glaucous-Winged Gull/Alaska/20MB020516/2020 | Import from public domain | HE,N.; Runstadler,J.                                                      |
| EP1075111 | MP | United States | 2020-Aug-10 | EP_13_989574 | A/Glaucous-Winged Gull/Alaska/20MB020516/2020 | Import from public domain | HE,N.; Runstadler,J.                                                      |
| EP1075103 | NS | United States | 2020-Sep-04 | EP_13_989573 | A/Glaucous-Winged Gull/Alaska/20MB020326/2020 | Import from public domain | HE,N.; Runstadler,J.                                                      |
| EP1075120 | MP | United States | 2020-Sep-04 | EP_13_989573 | A/Glaucous-Winged Gull/Alaska/20MB020326/2020 | Import from public domain | HE,N.; Runstadler,J.                                                      |
| EP1075101 | NP | United States | 2020-Sep-04 | EP_13_989573 | A/Glaucous-Winged Gull/Alaska/20MB020326/2020 | Import from public domain | HE,N.; Runstadler,J.                                                      |
| EP1075095 | NP | United States | 2020-Sep-04 | EP_13_989507 | A/Glaucous-Winged Gull/Alaska/20MB020316/2020 | Import from public domain | HE,N.; Runstadler,J.                                                      |
| EP1075097 | MP | United States | 2020-Sep-04 | EP_13_989507 | A/Glaucous-Winged Gull/Alaska/20MB020316/2020 | Import from public domain | HE,N.; Runstadler,J.                                                      |
| EP1075098 | NS | United States | 2020-Sep-04 | EP_13_989507 | A/Glaucous-Winged Gull/Alaska/20MB020316/2020 | Import from public domain | HE,N.; Runstadler,J.                                                      |
| EP1075094 | NS | United States | 2020-Sep-04 | EP_13_989474 | A/Glaucous-Winged Gull/Alaska/20MB020317/2020 | Import from public domain | HE,N.; Runstadler,J.                                                      |
| EP1075085 | MP | United States | 2020-Sep-04 | EP_13_989474 | A/Glaucous-Winged Gull/Alaska/20MB020317/2020 | Import from public domain | HE,N.; Runstadler,J.                                                      |
| EP1075090 | NP | United States | 2020-Sep-04 | EP_13_989474 | A/Glaucous-Winged Gull/Alaska/20MB020317/2020 | Import from public domain | HE,N.; Runstadler,J.                                                      |
| EP1075076 | MP | United States | 2020-Aug-07 | EP_13_989464 | A/Glaucous-Winged Gull/Alaska/20MB020498/2020 | Import from public domain | HE,N.; Runstadler,J.                                                      |
| EP1075081 | NP | United States | 2020-Aug-07 | EP_13_989464 | A/Glaucous-Winged Gull/Alaska/20MB020498/2020 | Import from public domain | HE,N.; Runstadler,J.                                                      |
| EP1075082 | NS | United States | 2020-Aug-07 | EP_13_989464 | A/Glaucous-Winged Gull/Alaska/20MB020498/2020 | Import from public domain | HE,N.; Runstadler,J.                                                      |
| EP1075090 | NP | United States | 2020-Sep-05 | EP_13_989443 | A/Glaucous-Winged Gull/Alaska/20MB020316/2020 | Import from public domain | HE,N.; Runstadler,J.                                                      |
| EP1075084 | MP | United States | 2020-Sep-05 | EP_13_989443 | A/Glaucous-Winged Gull/Alaska/20MB020316/2020 | Import from public domain | HE,N.; Runstadler,J.                                                      |
| EP1075067 | NS | United States | 2020-Sep-05 | EP_13_989443 | A/Glaucous-Winged Gull/Alaska/20MB020316/2020 | Import from public domain | HE,N.; Runstadler,J.                                                      |
| EP1075058 | NP | United States | 2020-Aug-21 | EP_13_989438 | A/Glaucous-Winged Gull/Alaska/20MB020198/2020 | Import from public domain | HE,N.; Runstadler,J.                                                      |

















|            |    |                    |             |                |                                                           |                                             |                                                              |  |                                                                                                                                                                                                                                          |
|------------|----|--------------------|-------------|----------------|-----------------------------------------------------------|---------------------------------------------|--------------------------------------------------------------|--|------------------------------------------------------------------------------------------------------------------------------------------------------------------------------------------------------------------------------------------|
| EP1762428  | MP | United States      | 2014-Aug-19 | EP_10_222169   | A/glaucous-winged gull/Southcentral Alaska/24MB03136/2014 |                                             | Import from public domain                                    |  | Das,S.R.; Halpin,B.A.; Lin,X.; Simerauer,A.; Alepou,A.; Fedorova,N.; Pur,V.; Stockwell,T.; Amedeo,F.; Kataf,D.; Schibler,S.; Shrivastava,S.; HE,N.; Bao,Y.; Sanders,B.; Zhdanov,S.; Kryutin,B.; Urganov,D.I.; Tatusova,T.; Runstadler,J. |
| EP1762430  | NP | United States      | 2014-Aug-19 | EP_10_222169   | A/glaucous-winged gull/Southcentral Alaska/24MB03136/2014 |                                             | Import from public domain                                    |  | Das,S.R.; Halpin,B.A.; Lin,X.; Simerauer,A.; Alepou,A.; Fedorova,N.; Pur,V.; Stockwell,T.; Amedeo,F.; Kataf,D.; Schibler,S.; Shrivastava,S.; HE,N.; Bao,Y.; Sanders,B.; Zhdanov,S.; Kryutin,B.; Urganov,D.I.; Tatusova,T.; Runstadler,J. |
| EP1762411  | NS | United States      | 2014-Aug-19 | EP_10_222169   | A/glaucous-winged gull/Southcentral Alaska/24MB03136/2014 |                                             | Import from public domain                                    |  | Das,S.R.; Halpin,B.A.; Lin,X.; Simerauer,A.; Alepou,A.; Fedorova,N.; Pur,V.; Stockwell,T.; Amedeo,F.; Kataf,D.; Schibler,S.; Shrivastava,S.; HE,N.; Bao,Y.; Sanders,B.; Zhdanov,S.; Kryutin,B.; Urganov,D.I.; Tatusova,T.; Runstadler,J. |
| EP1762423  | NP | United States      | 2014-Aug-12 | EP_10_222168   | A/glaucous-winged gull/Southcentral Alaska/24MB03023/2014 |                                             | Import from public domain                                    |  | Das,S.R.; Halpin,B.A.; Lin,X.; Simerauer,A.; Alepou,A.; Fedorova,N.; Pur,V.; Stockwell,T.; Amedeo,F.; Kataf,D.; Schibler,S.; Shrivastava,S.; HE,N.; Bao,Y.; Sanders,B.; Zhdanov,S.; Kryutin,B.; Urganov,D.I.; Tatusova,T.; Runstadler,J. |
| EP1762424  | NS | United States      | 2014-Aug-12 | EP_10_222168   | A/glaucous-winged gull/Southcentral Alaska/24MB03023/2014 |                                             | Import from public domain                                    |  | Das,S.R.; Halpin,B.A.; Lin,X.; Simerauer,A.; Alepou,A.; Fedorova,N.; Pur,V.; Stockwell,T.; Amedeo,F.; Kataf,D.; Schibler,S.; Shrivastava,S.; HE,N.; Bao,Y.; Sanders,B.; Zhdanov,S.; Kryutin,B.; Urganov,D.I.; Tatusova,T.; Runstadler,J. |
| EP1762421  | MP | United States      | 2014-Aug-12 | EP_10_222168   | A/glaucous-winged gull/Southcentral Alaska/24MB03023/2014 |                                             | Import from public domain                                    |  | Das,S.R.; Halpin,B.A.; Lin,X.; Simerauer,A.; Alepou,A.; Fedorova,N.; Pur,V.; Stockwell,T.; Amedeo,F.; Kataf,D.; Schibler,S.; Shrivastava,S.; HE,N.; Bao,Y.; Sanders,B.; Zhdanov,S.; Kryutin,B.; Urganov,D.I.; Tatusova,T.; Runstadler,J. |
| EP1762212  | MP | United States      | 2014-Aug-19 | EP_10_222145   | A/glaucous-winged gull/Southcentral Alaska/24MB03136/2014 |                                             | Import from public domain                                    |  | Das,S.R.; Halpin,B.A.; Lin,X.; Simerauer,A.; Alepou,A.; Fedorova,N.; Pur,V.; Stockwell,T.; Amedeo,F.; Kataf,D.; Schibler,S.; Shrivastava,S.; HE,N.; Bao,Y.; Sanders,B.; Zhdanov,S.; Kryutin,B.; Urganov,D.I.; Tatusova,T.; Runstadler,J. |
| EP1762234  | NP | United States      | 2014-Aug-19 | EP_10_222145   | A/glaucous-winged gull/Southcentral Alaska/24MB03136/2014 |                                             | Import from public domain                                    |  | Das,S.R.; Halpin,B.A.; Lin,X.; Simerauer,A.; Alepou,A.; Fedorova,N.; Pur,V.; Stockwell,T.; Amedeo,F.; Kataf,D.; Schibler,S.; Shrivastava,S.; HE,N.; Bao,Y.; Sanders,B.; Zhdanov,S.; Kryutin,B.; Urganov,D.I.; Tatusova,T.; Runstadler,J. |
| EP1762235  | NS | United States      | 2014-Aug-19 | EP_10_222145   | A/glaucous-winged gull/Southcentral Alaska/24MB03136/2014 |                                             | Import from public domain                                    |  | Das,S.R.; Halpin,B.A.; Lin,X.; Simerauer,A.; Alepou,A.; Fedorova,N.; Pur,V.; Stockwell,T.; Amedeo,F.; Kataf,D.; Schibler,S.; Shrivastava,S.; HE,N.; Bao,Y.; Sanders,B.; Zhdanov,S.; Kryutin,B.; Urganov,D.I.; Tatusova,T.; Runstadler,J. |
| EP1303215  | MP | United States      | 2022-May-31 | EP_10_16920547 | A/huland gull/Delaware/612/2022                           |                                             | Import from public domain                                    |  | Direct Submission                                                                                                                                                                                                                        |
| EP1303216  | NP | United States      | 2022-May-31 | EP_10_16920547 | A/huland gull/Delaware/612/2022                           |                                             | Import from public domain                                    |  | Direct Submission                                                                                                                                                                                                                        |
| EP1303213  | NS | United States      | 2022-May-31 | EP_10_16920547 | A/huland gull/Delaware/612/2022                           |                                             | Import from public domain                                    |  | Direct Submission                                                                                                                                                                                                                        |
| EP1303122  | NS | United States      | 2022-May-31 | EP_10_16919128 | A/huland gull/Delaware/618/2022                           |                                             | Import from public domain                                    |  | Direct Submission                                                                                                                                                                                                                        |
| EP1303124  | MP | United States      | 2022-May-31 | EP_10_16919128 | A/huland gull/Delaware/618/2022                           |                                             | Import from public domain                                    |  | Direct Submission                                                                                                                                                                                                                        |
| EP1303126  | NP | United States      | 2022-May-31 | EP_10_16919128 | A/huland gull/Delaware/618/2022                           |                                             | Import from public domain                                    |  | Direct Submission                                                                                                                                                                                                                        |
| EP1303145  | NP | United States      | 2022-May-31 | EP_10_16919094 | A/great black-backed gull/Delaware/644/2022               |                                             | Import from public domain                                    |  | Direct Submission                                                                                                                                                                                                                        |
| EP1303146  | MP | United States      | 2022-May-31 | EP_10_16919094 | A/great black-backed gull/Delaware/644/2022               |                                             | Import from public domain                                    |  | Direct Submission                                                                                                                                                                                                                        |
| EP1303146  | NS | United States      | 2022-May-31 | EP_10_16919094 | A/great black-backed gull/Delaware/644/2022               |                                             | Import from public domain                                    |  | Direct Submission                                                                                                                                                                                                                        |
| EP1247949  | MP | United States      | 2021-Jun-01 | EP_10_14777730 | A/great black-backed gull/Delaware/632/2021               |                                             | Import from public domain                                    |  | Direct Submission                                                                                                                                                                                                                        |
| EP1247990  | NP | United States      | 2021-Jun-01 | EP_10_14777730 | A/great black-backed gull/Delaware/632/2021               |                                             | Import from public domain                                    |  | Direct Submission                                                                                                                                                                                                                        |
| EP1247951  | NS | United States      | 2021-Jun-01 | EP_10_14777730 | A/great black-backed gull/Delaware/632/2021               |                                             | Import from public domain                                    |  | Direct Submission                                                                                                                                                                                                                        |
| EP1504437  | MP | China              | 2018-Oct-23 | EP_10_393957   | A/great black-headed gull/Ningxia/1/2018(91594)           | Harbin Veterinary Research Institute (CAAS) | Harbin Veterinary Research Institute (CAAS)                  |  | Yuh,Li(Minghui),Ji,Jingman,Tan,Yanbing,Li                                                                                                                                                                                                |
| EP1504435  | NP | China              | 2018-Oct-23 | EP_10_393957   | A/great black-headed gull/Ningxia/1/2018(91594)           | Harbin Veterinary Research Institute (CAAS) | Harbin Veterinary Research Institute (CAAS)                  |  | Yuh,Li(Minghui),Ji,Jingman,Tan,Yanbing,Li                                                                                                                                                                                                |
| EP1504441  | NS | China              | 2018-Oct-23 | EP_10_393957   | A/great black-headed gull/Ningxia/1/2018(91594)           | Harbin Veterinary Research Institute (CAAS) | Harbin Veterinary Research Institute (CAAS)                  |  | Yuh,Li(Minghui),Ji,Jingman,Tan,Yanbing,Li                                                                                                                                                                                                |
| EP1504479  | MP | China              | 2018-Oct-23 | EP_10_393962   | A/great black-headed gull/Ningxia/2/2018(91594)           | Harbin Veterinary Research Institute (CAAS) | Harbin Veterinary Research Institute (CAAS)                  |  | Yuh,Li(Minghui),Ji,Jingman,Tan,Yanbing,Li                                                                                                                                                                                                |
| EP1504480  | NS | China              | 2018-Oct-23 | EP_10_393962   | A/great black-headed gull/Ningxia/2/2018(91594)           | Harbin Veterinary Research Institute (CAAS) | Harbin Veterinary Research Institute (CAAS)                  |  | Yuh,Li(Minghui),Ji,Jingman,Tan,Yanbing,Li                                                                                                                                                                                                |
| EP1504477  | NP | China              | 2018-Oct-23 | EP_10_393962   | A/great black-headed gull/Ningxia/2/2018(91594)           | Harbin Veterinary Research Institute (CAAS) | Harbin Veterinary Research Institute (CAAS)                  |  | Yuh,Li(Minghui),Ji,Jingman,Tan,Yanbing,Li                                                                                                                                                                                                |
| EP1961526  | NS | Russian Federation | 2016-Oct-01 | EP_10_268303   | A/environment/Kamchatka/11/7/2016                         |                                             | State Research Center of Virology and Biotechnology (VECTER) |  | Ivan,Sokolovov; Natalya,Goncharova; Natalya,Koloso; Vasily,Marchenko; Alexander,Rykhlov                                                                                                                                                  |
| EP1961528  | MP | Russian Federation | 2016-Oct-01 | EP_10_268303   | A/environment/Kamchatka/11/7/2016                         |                                             | State Research Center of Virology and Biotechnology (VECTER) |  | Ivan,Sokolovov; Natalya,Goncharova; Natalya,Koloso; Vasily,Marchenko; Alexander,Rykhlov                                                                                                                                                  |
| EP1961491  | NP | Russian Federation | 2016-Oct-01 | EP_10_268303   | A/environment/Kamchatka/11/7/2016                         |                                             | State Research Center of Virology and Biotechnology (VECTER) |  | Ivan,Sokolovov; Natalya,Goncharova; Natalya,Koloso; Vasily,Marchenko; Alexander,Rykhlov                                                                                                                                                  |
| EP1228836  | NS | Chile              | 2016-Apr-27 | EP_10_128953   | A/leghorn gull/Chile/C10783/2016                          |                                             | Import from public domain                                    |  | Amenez-Buhm,P.; Hamilton,C.; van Balbeek,H.; RH,D.; Schultz-Cherry,S.                                                                                                                                                                    |
| EP1228840  | NP | Chile              | 2016-Apr-27 | EP_10_128953   | A/leghorn gull/Chile/C10783/2016                          |                                             | Import from public domain                                    |  | Amenez-Buhm,P.; Hamilton,C.; van Balbeek,H.; RH,D.; Schultz-Cherry,S.                                                                                                                                                                    |
| EP1228840  | MP | Chile              | 2016-Apr-27 | EP_10_128953   | A/leghorn gull/Chile/C10783/2016                          |                                             | Import from public domain                                    |  | Amenez-Buhm,P.; Hamilton,C.; van Balbeek,H.; RH,D.; Schultz-Cherry,S.                                                                                                                                                                    |
| EP13301302 | NP | Chile              | 2016-Dec-13 | EP_10_127927   | A/black skimmer/Chile/C20077/2016                         |                                             | Import from public domain                                    |  | Bravo-Vasquez,N.; Bal,E.; Hamilton-Ward,C.; Schultz-Cherry,S.                                                                                                                                                                            |
| EP13301284 | NS | Chile              | 2016-Dec-13 | EP_10_127927   | A/black skimmer/Chile/C20077/2016                         |                                             | Import from public domain                                    |  | Bravo-Vasquez,N.; Bal,E.; Hamilton-Ward,C.; Schultz-Cherry,S.                                                                                                                                                                            |

|           |    |        |             |              |                                                     |                                                                         |                                     |                                                                            |
|-----------|----|--------|-------------|--------------|-----------------------------------------------------|-------------------------------------------------------------------------|-------------------------------------|----------------------------------------------------------------------------|
| EP1301292 | MP | Chile  | 2016-Dec-13 | EP_10_327627 | A/black skimmer/Chile/2007/2016                     |                                                                         | Import from public domain           | Bravo-Vasquez,N; Bahf,J; Hamilton-Went,C; Schultz-Cherry,S                 |
| EP1301296 | MP | Chile  | 2016-Dec-13 | EP_10_327626 | A/black skimmer/Chile/2008/2016                     |                                                                         | Import from public domain           | Bravo-Vasquez,N; Bahf,J; Hamilton-Went,C; Schultz-Cherry,S                 |
| EP1301303 | NS | Chile  | 2016-Dec-13 | EP_10_327626 | A/black skimmer/Chile/2008/2016                     |                                                                         | Import from public domain           | Bravo-Vasquez,N; Bahf,J; Hamilton-Went,C; Schultz-Cherry,S                 |
| EP1301272 | NP | Chile  | 2016-Dec-13 | EP_10_327626 | A/black skimmer/Chile/2008/2016                     |                                                                         | Import from public domain           | Bravo-Vasquez,N; Bahf,J; Hamilton-Went,C; Schultz-Cherry,S                 |
| EP1301294 | NS | Chile  | 2016-Dec-13 | EP_10_327625 | A/black skimmer/Chile/2010/2016                     |                                                                         | Import from public domain           | Bravo-Vasquez,N; Bahf,J; Hamilton-Went,C; Schultz-Cherry,S                 |
| EP1301300 | MP | Chile  | 2016-Dec-13 | EP_10_327625 | A/black skimmer/Chile/2010/2016                     |                                                                         | Import from public domain           | Bravo-Vasquez,N; Bahf,J; Hamilton-Went,C; Schultz-Cherry,S                 |
| EP1301270 | NP | Chile  | 2016-Dec-13 | EP_10_327625 | A/black skimmer/Chile/2010/2016                     |                                                                         | Import from public domain           | Bravo-Vasquez,N; Bahf,J; Hamilton-Went,C; Schultz-Cherry,S                 |
| EP1301274 | NP | Chile  | 2016-Dec-13 | EP_10_327624 | A/black skimmer/Chile/2005/2016                     |                                                                         | Import from public domain           | Bravo-Vasquez,N; Bahf,J; Hamilton-Went,C; Schultz-Cherry,S                 |
| EP1301282 | NS | Chile  | 2016-Dec-13 | EP_10_327624 | A/black skimmer/Chile/2005/2016                     |                                                                         | Import from public domain           | Bravo-Vasquez,N; Bahf,J; Hamilton-Went,C; Schultz-Cherry,S                 |
| EP1301288 | MP | Chile  | 2016-Dec-13 | EP_10_327624 | A/black skimmer/Chile/2005/2016                     |                                                                         | Import from public domain           | Bravo-Vasquez,N; Bahf,J; Hamilton-Went,C; Schultz-Cherry,S                 |
| EP1301264 | MP | Chile  | 2016-Dec-13 | EP_10_327623 | A/black skimmer/Chile/2010/2016                     |                                                                         | Import from public domain           | Bravo-Vasquez,N; Bahf,J; Hamilton-Went,C; Schultz-Cherry,S                 |
| EP1301269 | NP | Chile  | 2016-Dec-13 | EP_10_327623 | A/black skimmer/Chile/2010/2016                     |                                                                         | Import from public domain           | Bravo-Vasquez,N; Bahf,J; Hamilton-Went,C; Schultz-Cherry,S                 |
| EP1301281 | NS | Chile  | 2016-Dec-13 | EP_10_327623 | A/black skimmer/Chile/2010/2016                     |                                                                         | Import from public domain           | Bravo-Vasquez,N; Bahf,J; Hamilton-Went,C; Schultz-Cherry,S                 |
| EP1301250 | NP | Chile  | 2016-Dec-13 | EP_10_327622 | A/black skimmer/Chile/2014/2016                     |                                                                         | Import from public domain           | Bravo-Vasquez,N; Bahf,J; Hamilton-Went,C; Schultz-Cherry,S                 |
| EP1301256 | MP | Chile  | 2016-Dec-13 | EP_10_327622 | A/black skimmer/Chile/2014/2016                     |                                                                         | Import from public domain           | Bravo-Vasquez,N; Bahf,J; Hamilton-Went,C; Schultz-Cherry,S                 |
| EP1301259 | NS | Chile  | 2016-Dec-13 | EP_10_327622 | A/black skimmer/Chile/2014/2016                     |                                                                         | Import from public domain           | Bravo-Vasquez,N; Bahf,J; Hamilton-Went,C; Schultz-Cherry,S                 |
| EP1301243 | MP | Chile  | 2016-Dec-13 | EP_10_327621 | A/black skimmer/Chile/2012/2016                     |                                                                         | Import from public domain           | Bravo-Vasquez,N; Bahf,J; Hamilton-Went,C; Schultz-Cherry,S                 |
| EP1301254 | NS | Chile  | 2016-Dec-13 | EP_10_327621 | A/black skimmer/Chile/2012/2016                     |                                                                         | Import from public domain           | Bravo-Vasquez,N; Bahf,J; Hamilton-Went,C; Schultz-Cherry,S                 |
| EP1301236 | NP | Chile  | 2016-Dec-13 | EP_10_327621 | A/black skimmer/Chile/2012/2016                     |                                                                         | Import from public domain           | Bravo-Vasquez,N; Bahf,J; Hamilton-Went,C; Schultz-Cherry,S                 |
| EP1301238 | NP | Chile  | 2016-Dec-13 | EP_10_327620 | A/black skimmer/Chile/2012/2016                     |                                                                         | Import from public domain           | Bravo-Vasquez,N; Bahf,J; Hamilton-Went,C; Schultz-Cherry,S                 |
| EP1301241 | MP | Chile  | 2016-Dec-13 | EP_10_327620 | A/black skimmer/Chile/2012/2016                     |                                                                         | Import from public domain           | Bravo-Vasquez,N; Bahf,J; Hamilton-Went,C; Schultz-Cherry,S                 |
| EP1301235 | NS | Chile  | 2016-Dec-13 | EP_10_327620 | A/black skimmer/Chile/2012/2016                     |                                                                         | Import from public domain           | Bravo-Vasquez,N; Bahf,J; Hamilton-Went,C; Schultz-Cherry,S                 |
| EP1301242 | NP | Chile  | 2016-Dec-13 | EP_10_327619 | A/black skimmer/Chile/2014/2016                     |                                                                         | Import from public domain           | Bravo-Vasquez,N; Bahf,J; Hamilton-Went,C; Schultz-Cherry,S                 |
| EP1301245 | NS | Chile  | 2016-Dec-13 | EP_10_327619 | A/black skimmer/Chile/2014/2016                     |                                                                         | Import from public domain           | Bravo-Vasquez,N; Bahf,J; Hamilton-Went,C; Schultz-Cherry,S                 |
| EP1301247 | MP | Chile  | 2016-Dec-13 | EP_10_327619 | A/black skimmer/Chile/2014/2016                     |                                                                         | Import from public domain           | Bravo-Vasquez,N; Bahf,J; Hamilton-Went,C; Schultz-Cherry,S                 |
| EP1301205 | MP | Chile  | 2016-Dec-13 | EP_10_327611 | A/leggett tern/Chile/2009/2016                      |                                                                         | Import from public domain           | Bravo-Vasquez,N; Bahf,J; Hamilton-Went,C; Schultz-Cherry,S                 |
| EP1301206 | NS | Chile  | 2016-Dec-13 | EP_10_327611 | A/leggett tern/Chile/2009/2016                      |                                                                         | Import from public domain           | Bravo-Vasquez,N; Bahf,J; Hamilton-Went,C; Schultz-Cherry,S                 |
| EP1301209 | NP | Chile  | 2016-Dec-13 | EP_10_327611 | A/leggett tern/Chile/2009/2016                      |                                                                         | Import from public domain           | Bravo-Vasquez,N; Bahf,J; Hamilton-Went,C; Schultz-Cherry,S                 |
| EP1301204 | NP | Chile  | 2016-Dec-13 | EP_10_327610 | A/leggett tern/Chile/2009/2016                      |                                                                         | Import from public domain           | Bravo-Vasquez,N; Bahf,J; Hamilton-Went,C; Schultz-Cherry,S                 |
| EP1301213 | MP | Chile  | 2016-Dec-13 | EP_10_327610 | A/leggett tern/Chile/2009/2016                      |                                                                         | Import from public domain           | Bravo-Vasquez,N; Bahf,J; Hamilton-Went,C; Schultz-Cherry,S                 |
| EP1301215 | NS | Chile  | 2016-Dec-13 | EP_10_327610 | A/leggett tern/Chile/2009/2016                      |                                                                         | Import from public domain           | Bravo-Vasquez,N; Bahf,J; Hamilton-Went,C; Schultz-Cherry,S                 |
| EP1051471 | NP | China  | 2015-Dec-26 | EP_10_277382 | A/Hean/Taii China/2015/2015(11394)                  | Institute of Poultry Science, Shandong, Academy of Agricultural Science | South China Agricultural University | Yueling,Wang,Kangyuan,Yuan,Wu,A;Lihong,Q; Yuan,Zhang; Huanying,K; Kai,Meng |
| EP1051473 | MP | China  | 2015-Dec-26 | EP_10_277382 | A/Hean/Taii China/2015/2015(11394)                  | Institute of Poultry Science, Shandong, Academy of Agricultural Science | South China Agricultural University | Yueling,Wang,Kangyuan,Yuan,Wu,A;Lihong,Q; Yuan,Zhang; Huanying,K; Kai,Meng |
| EP1051474 | NS | China  | 2015-Dec-26 | EP_10_277382 | A/Hean/Taii China/2015/2015(11394)                  | Institute of Poultry Science, Shandong, Academy of Agricultural Science | South China Agricultural University | Yueling,Wang,Kangyuan,Yuan,Wu,A;Lihong,Q; Yuan,Zhang; Huanying,K; Kai,Meng |
| EP1884899 | NP | Sweden | 2021-Jul-13 | EP_10_339119 | A/Common gallinot/Sweden/VA2107392021/78052610/2021 | National Veterinary Institute, SVA                                      | National Veterinary Institute       |                                                                            |

|           |    |                    |             |                |                                                        |                                                              |                                                  |                                                                                                                                                                                                                                                                                                                                           |
|-----------|----|--------------------|-------------|----------------|--------------------------------------------------------|--------------------------------------------------------------|--------------------------------------------------|-------------------------------------------------------------------------------------------------------------------------------------------------------------------------------------------------------------------------------------------------------------------------------------------------------------------------------------------|
| EP1884901 | MP | Sweden             | 2021-Jul-13 | EP_18_319119   | A/Common.gulfemot/Sweden/VNAZ107292020117/8002010/2021 | National Veterinary Institute, SVA                           | National Veterinary Institute                    |                                                                                                                                                                                                                                                                                                                                           |
| EP1884902 | NS | Sweden             | 2021-Jul-13 | EP_18_319119   | A/Common.gulfemot/Sweden/VNAZ107292020117/8002010/2021 | National Veterinary Institute, SVA                           | National Veterinary Institute                    |                                                                                                                                                                                                                                                                                                                                           |
| EP1307087 | MP | United States      | 2016-May-27 | EP_18_279337   | A/Environment/New Jersey/USA16-0787/2016               |                                                              | Import from public domain                        | Pickett,B., Fedorova,N., ParfV.; Shinwatawa,S.; Amadoes,F.; Isom,B.; Hui,L.; Durbin,A.; Roehl,T.; Williams,T.; Pookon,R.L.; Bao,Y.; Sanders,B.; Zhdanov,S.; Kryatyn,B.; Ligran,D.I.; Tatuawa,T.; Skallneeth,D.E.                                                                                                                          |
| EP1307089 | NP | United States      | 2016-May-27 | EP_18_279337   | A/Environment/New Jersey/USA16-0787/2016               |                                                              | Import from public domain                        | Pickett,B., Fedorova,N., ParfV.; Shinwatawa,S.; Amadoes,F.; Isom,B.; Hui,L.; Durbin,A.; Roehl,T.; Williams,T.; Pookon,R.L.; Bao,Y.; Sanders,B.; Zhdanov,S.; Kryatyn,B.; Ligran,D.I.; Tatuawa,T.; Skallneeth,D.E.                                                                                                                          |
| EP1307090 | NS | United States      | 2016-May-27 | EP_18_279337   | A/Environment/New Jersey/USA16-0787/2016               |                                                              | Import from public domain                        | Pickett,B., Fedorova,N., ParfV.; Shinwatawa,S.; Amadoes,F.; Isom,B.; Hui,L.; Durbin,A.; Roehl,T.; Williams,T.; Pookon,R.L.; Bao,Y.; Sanders,B.; Zhdanov,S.; Kryatyn,B.; Ligran,D.I.; Tatuawa,T.; Skallneeth,D.E.                                                                                                                          |
| EP1206990 | MP | United States      | 2016-May-16 | EP_18_279322   | A/Environment/New Jersey/USA16-1048/2016               |                                                              | Import from public domain                        | Pickett,B., Fedorova,N., ParfV.; Shinwatawa,S.; Amadoes,F.; Isom,B.; Hui,L.; Durbin,A.; Roehl,T.; Williams,T.; Pookon,R.L.; Bao,Y.; Sanders,B.; Zhdanov,S.; Kryatyn,B.; Ligran,D.I.; Tatuawa,T.; Skallneeth,D.E.                                                                                                                          |
| EP1206992 | NP | United States      | 2016-May-16 | EP_18_279322   | A/Environment/New Jersey/USA16-1048/2016               |                                                              | Import from public domain                        | Pickett,B., Fedorova,N., ParfV.; Shinwatawa,S.; Amadoes,F.; Isom,B.; Hui,L.; Durbin,A.; Roehl,T.; Williams,T.; Pookon,R.L.; Bao,Y.; Sanders,B.; Zhdanov,S.; Kryatyn,B.; Ligran,D.I.; Tatuawa,T.; Skallneeth,D.E.                                                                                                                          |
| EP1206993 | NS | United States      | 2016-May-16 | EP_18_279322   | A/Environment/New Jersey/USA16-1048/2016               |                                                              | Import from public domain                        | Pickett,B., Fedorova,N., ParfV.; Shinwatawa,S.; Amadoes,F.; Isom,B.; Hui,L.; Durbin,A.; Roehl,T.; Williams,T.; Pookon,R.L.; Bao,Y.; Sanders,B.; Zhdanov,S.; Kryatyn,B.; Ligran,D.I.; Tatuawa,T.; Skallneeth,D.E.                                                                                                                          |
| EP1206238 | MP | United States      | 2016-May-25 | EP_18_279224   | A/Environment/New Jersey/USA16-1713/2016               |                                                              | Import from public domain                        | Pickett,B., Fedorova,N., ParfV.; Shinwatawa,S.; Amadoes,F.; Isom,B.; Hui,L.; Durbin,A.; Roehl,T.; Williams,T.; Pookon,R.L.; Bao,Y.; Sanders,B.; Zhdanov,S.; Kryatyn,B.; Ligran,D.I.; Tatuawa,T.; Skallneeth,D.E.                                                                                                                          |
| EP1206239 | NP | United States      | 2016-May-25 | EP_18_279224   | A/Environment/New Jersey/USA16-1713/2016               |                                                              | Import from public domain                        | Pickett,B., Fedorova,N., ParfV.; Shinwatawa,S.; Amadoes,F.; Isom,B.; Hui,L.; Durbin,A.; Roehl,T.; Williams,T.; Pookon,R.L.; Bao,Y.; Sanders,B.; Zhdanov,S.; Kryatyn,B.; Ligran,D.I.; Tatuawa,T.; Skallneeth,D.E.                                                                                                                          |
| EP1206270 | NP | United States      | 2016-May-25 | EP_18_279224   | A/Environment/New Jersey/USA16-1713/2016               |                                                              | Import from public domain                        | Pickett,B., Fedorova,N., ParfV.; Shinwatawa,S.; Amadoes,F.; Isom,B.; Hui,L.; Durbin,A.; Roehl,T.; Williams,T.; Pookon,R.L.; Bao,Y.; Sanders,B.; Zhdanov,S.; Kryatyn,B.; Ligran,D.I.; Tatuawa,T.; Skallneeth,D.E.                                                                                                                          |
| EP1206271 | NS | United States      | 2016-May-25 | EP_18_279224   | A/Environment/New Jersey/USA16-1713/2016               |                                                              | Import from public domain                        | Pickett,B., Fedorova,N., ParfV.; Shinwatawa,S.; Amadoes,F.; Isom,B.; Hui,L.; Durbin,A.; Roehl,T.; Williams,T.; Pookon,R.L.; Bao,Y.; Sanders,B.; Zhdanov,S.; Kryatyn,B.; Ligran,D.I.; Tatuawa,T.; Skallneeth,D.E.                                                                                                                          |
| EP823782  | NP | Russian Federation | 2016-May-01 | EP_18_231687   | A/Environment/Kamchatka/24/2016                        | State Research Center of Virology and Biotechnology (VECTOR) | WHO National Influenza Centre Russian Federation | Fedeev,Artem; Komissarov,Andrey; Egorova,Anna; Sitnova, Xenia; Muamara,Tamila; Sotolopareva,Zhen; Marchenko,Yevgeniy; Rykhlov,Alkander                                                                                                                                                                                                    |
| EP823787  | MP | Russian Federation | 2016-May-01 | EP_18_231687   | A/Environment/Kamchatka/24/2016                        | State Research Center of Virology and Biotechnology (VECTOR) | WHO National Influenza Centre Russian Federation | Fedeev,Artem; Komissarov,Andrey; Egorova,Anna; Sitnova, Xenia; Muamara,Tamila; Sotolopareva,Zhen; Marchenko,Yevgeniy; Rykhlov,Alkander                                                                                                                                                                                                    |
| EP823792  | NS | Russian Federation | 2016-May-01 | EP_18_231687   | A/Environment/Kamchatka/24/2016                        | State Research Center of Virology and Biotechnology (VECTOR) | WHO National Influenza Centre Russian Federation | Fedeev,Artem; Komissarov,Andrey; Egorova,Anna; Sitnova, Xenia; Muamara,Tamila; Sotolopareva,Zhen; Marchenko,Yevgeniy; Rykhlov,Alkander                                                                                                                                                                                                    |
| EP823798  | MP | Russian Federation | 2016-May-01 | EP_18_231686   | A/Environment/Kamchatka/23/2016                        | State Research Center of Virology and Biotechnology (VECTOR) | WHO National Influenza Centre Russian Federation | Fedeev,Artem; Komissarov,Andrey; Egorova,Anna; Sitnova, Xenia; Muamara,Tamila; Sotolopareva,Zhen; Marchenko,Yevgeniy; Rykhlov,Alkander                                                                                                                                                                                                    |
| EP823796  | NP | Russian Federation | 2016-May-01 | EP_18_231686   | A/Environment/Kamchatka/23/2016                        | State Research Center of Virology and Biotechnology (VECTOR) | WHO National Influenza Centre Russian Federation | Fedeev,Artem; Komissarov,Andrey; Egorova,Anna; Sitnova, Xenia; Muamara,Tamila; Sotolopareva,Zhen; Marchenko,Yevgeniy; Rykhlov,Alkander                                                                                                                                                                                                    |
| EP823771  | NS | Russian Federation | 2016-May-01 | EP_18_231686   | A/Environment/Kamchatka/23/2016                        | State Research Center of Virology and Biotechnology (VECTOR) | WHO National Influenza Centre Russian Federation | Fedeev,Artem; Komissarov,Andrey; Egorova,Anna; Sitnova, Xenia; Muamara,Tamila; Sotolopareva,Zhen; Marchenko,Yevgeniy; Rykhlov,Alkander                                                                                                                                                                                                    |
| EP214540  | NP | Australia          | 2019-Oct-30 | EP_18_1476929  | A/wild waterbird/Victoria/19-04759-011/2019            |                                                              | Import from public domain                        | Willis,M.; Grillo,V.; Ben de Gouveia Pedrosa,S.; Burgess,G.W.; Crawley,A.; Dickason,C.; Henderson,P.M.; Hoque,M.A.; Horwood,P.F.; Kirkland,P.D.; Kung,N.T.; Lynch,S.E.; Martin,S.; McArthur,M.; O'Rourke,Riley,K.; Reed,A.J.; Warner,S.; Hays,B.; Loonks,L.; Linn,T.; Hurt,A.; Butler,J.; Broz,J.; Davari,K.R.; Minto,P.; Neave,M.J.; Ste |
| EP2145462 | MP | Australia          | 2019-Oct-30 | EP_18_1476929  | A/wild waterbird/Victoria/19-04759-011/2019            |                                                              | Import from public domain                        | Willis,M.; Grillo,V.; Ben de Gouveia Pedrosa,S.; Burgess,G.W.; Crawley,A.; Dickason,C.; Henderson,P.M.; Hoque,M.A.; Horwood,P.F.; Kirkland,P.D.; Kung,N.T.; Lynch,S.E.; Martin,S.; McArthur,M.; O'Rourke,Riley,K.; Reed,A.J.; Warner,S.; Hays,B.; Loonks,L.; Linn,T.; Hurt,A.; Butler,J.; Broz,J.; Davari,K.R.; Minto,P.; Neave,M.J.; Ste |
| EP2145463 | NS | Australia          | 2019-Oct-30 | EP_18_1476929  | A/wild waterbird/Victoria/19-04759-011/2019            |                                                              | Import from public domain                        | Willis,M.; Grillo,V.; Ben de Gouveia Pedrosa,S.; Burgess,G.W.; Crawley,A.; Dickason,C.; Henderson,P.M.; Hoque,M.A.; Horwood,P.F.; Kirkland,P.D.; Kung,N.T.; Lynch,S.E.; Martin,S.; McArthur,M.; O'Rourke,Riley,K.; Reed,A.J.; Warner,S.; Hays,B.; Loonks,L.; Linn,T.; Hurt,A.; Butler,J.; Broz,J.; Davari,K.R.; Minto,P.; Neave,M.J.; Ste |
| EP1932185 | NP | Peru               | 2019-Oct-17 | EP_18_4795367  | A/Andp.gal/Peru/M8/2019                                |                                                              | Import from public domain                        | Smas,P.V.M.; Castro-Sanguinetti,G.; Apaza-Chiana,A.P.; Callupe-Leyva,J.A.; Rondon-Espinoza,J.A.; Ramirez-Velasquez,M.G.; Carrasco,C.; Flores,C.; Rivera-Sereno,M.; Calle-Espinoza,S.Y.; Gavilán-Chuzán,C.M.; Fernández,M.; More-Bayona,J.A.; González-Velázquez,I.; Inchea-O'Rourke,M.E.; Vaheria,V.N.                                    |
| EP1932186 | MP | Peru               | 2019-Oct-17 | EP_18_4795367  | A/Andp.gal/Peru/M8/2019                                |                                                              | Import from public domain                        | Smas,P.V.M.; Castro-Sanguinetti,G.; Apaza-Chiana,A.P.; Callupe-Leyva,J.A.; Rondon-Espinoza,J.A.; Ramirez-Velasquez,M.G.; Carrasco,C.; Flores,C.; Rivera-Sereno,M.; Calle-Espinoza,S.Y.; Gavilán-Chuzán,C.M.; Fernández,M.; More-Bayona,J.A.; González-Velázquez,I.; Inchea-O'Rourke,M.E.; Vaheria,V.N.                                    |
| EP1933026 | NS | Peru               | 2019-Oct-17 | EP_18_4795367  | A/Andp.gal/Peru/M8/2019                                |                                                              | Import from public domain                        | Smas,P.V.M.; Castro-Sanguinetti,G.; Apaza-Chiana,A.P.; Callupe-Leyva,J.A.; Rondon-Espinoza,J.A.; Ramirez-Velasquez,M.G.; Carrasco,C.; Flores,C.; Rivera-Sereno,M.; Calle-Espinoza,S.Y.; Gavilán-Chuzán,C.M.; Fernández,M.; More-Bayona,J.A.; González-Velázquez,I.; Inchea-O'Rourke,M.E.; Vaheria,V.N.                                    |
| EP1565239 | NP | China              | 2017-May-01 | EP_18_381339   | A/Duck/China/Wuhan/2017                                |                                                              | Import from public domain                        | Yu,Z.; Cheng,K.                                                                                                                                                                                                                                                                                                                           |
| EP1565241 | MP | China              | 2017-May-01 | EP_18_381339   | A/Duck/China/Wuhan/2017                                |                                                              | Import from public domain                        | Yu,Z.; Cheng,K.                                                                                                                                                                                                                                                                                                                           |
| EP1565242 | NS | China              | 2017-May-01 | EP_18_381339   | A/Duck/China/Wuhan/2017                                |                                                              | Import from public domain                        | Yu,Z.; Cheng,K.                                                                                                                                                                                                                                                                                                                           |
| EP1729743 | NP | United States      | 2014-Sep-29 | EP_18_215572   | A/northern.pintail/Alaska/866/2014                     |                                                              | Import from public domain                        | Ramey,A.M.; Reeves,A.B.; Teflon,J.L.; Nashold,S.; Donnelly,T.; Bahji,H.H.J.S.; Donnelly,T.F.                                                                                                                                                                                                                                              |
| EP1729745 | MP | United States      | 2014-Sep-29 | EP_18_215572   | A/northern.pintail/Alaska/866/2014                     |                                                              | Import from public domain                        | Ramey,A.M.; Reeves,A.B.; Teflon,J.L.; Nashold,S.; Donnelly,T.; Bahji,H.H.J.S.; Donnelly,T.F.                                                                                                                                                                                                                                              |
| EP1729746 | NS | United States      | 2014-Sep-29 | EP_18_215572   | A/northern.pintail/Alaska/866/2014                     |                                                              | Import from public domain                        | Ramey,A.M.; Reeves,A.B.; Teflon,J.L.; Nashold,S.; Donnelly,T.; Bahji,H.H.J.S.; Donnelly,T.F.                                                                                                                                                                                                                                              |
| EP1729759 | NP | United States      | 2014-Sep-22 | EP_18_215574   | A/mallard/Alaska/903/2014                              |                                                              | Import from public domain                        | Ramey,A.M.; Reeves,A.B.; Teflon,J.L.; Nashold,S.; Donnelly,T.; Bahji,H.H.J.S.; Donnelly,T.F.                                                                                                                                                                                                                                              |
| EP1729761 | MP | United States      | 2014-Sep-22 | EP_18_215574   | A/mallard/Alaska/903/2014                              |                                                              | Import from public domain                        | Ramey,A.M.; Reeves,A.B.; Teflon,J.L.; Nashold,S.; Donnelly,T.; Bahji,H.H.J.S.; Donnelly,T.F.                                                                                                                                                                                                                                              |
| EP1729762 | NS | United States      | 2014-Sep-22 | EP_18_215574   | A/mallard/Alaska/903/2014                              |                                                              | Import from public domain                        | Ramey,A.M.; Reeves,A.B.; Teflon,J.L.; Nashold,S.; Donnelly,T.; Bahji,H.H.J.S.; Donnelly,T.F.                                                                                                                                                                                                                                              |
| EP1403130 | NS | United States      | 2022-May-31 | EP_18_16820536 | A/Laughing.gal/V Delaware/859/2022                     |                                                              | Import from public domain                        | Direct Submission                                                                                                                                                                                                                                                                                                                         |
| EP1403131 | MP | United States      | 2022-May-31 | EP_18_16820536 | A/Laughing.gal/V Delaware/859/2022                     |                                                              | Import from public domain                        | Direct Submission                                                                                                                                                                                                                                                                                                                         |
| EP1403133 | NP | United States      | 2022-May-31 | EP_18_16820536 | A/Laughing.gal/V Delaware/859/2022                     |                                                              | Import from public domain                        | Direct Submission                                                                                                                                                                                                                                                                                                                         |







|           |    |               |             |                 |                                            |                           |                                                                                                                                                                                                                              |
|-----------|----|---------------|-------------|-----------------|--------------------------------------------|---------------------------|------------------------------------------------------------------------------------------------------------------------------------------------------------------------------------------------------------------------------|
| EP122727  | NP | United States | 2017-May-23 | EP_10_309425    | A\laughtng.gpl\New Jersey\USA127-2830\2017 | Import from public domain | Tan,G.; Pickrel,B.; Fedorova,N.; Amadeo,P.; Isum,A.; Hui,J.; Christensen,J.; Durkin,A.; Williams,T.; Arummet,F.; Paulsen,R.; Bao,Y.; Sender,R.; Zhidnev,S.; Kiryush,B.; Ljerman,D.I.; Tatusova,T.; Hatcher,E.; Stalkovich,D. |
| EP122728  | NS | United States | 2017-May-23 | EP_10_309425    | A\laughtng.gpl\New Jersey\USA127-2830\2017 | Import from public domain | Tan,G.; Pickrel,B.; Fedorova,N.; Amadeo,P.; Isum,A.; Hui,J.; Christensen,J.; Durkin,A.; Williams,T.; Arummet,F.; Paulsen,R.; Bao,Y.; Sender,R.; Zhidnev,S.; Kiryush,B.; Ljerman,D.I.; Tatusova,T.; Hatcher,E.; Stalkovich,D. |
| EP178945  | MP | United States | 2019-May-20 | EP_10_305800    | A\herring.gpl\Delaware\597\2019            | Import from public domain | Woodard,K.; Kercher,J.; Mulhejra,N.; Webby,R.                                                                                                                                                                                |
| EP178948  | NP | United States | 2019-May-20 | EP_10_305800    | A\herring.gpl\Delaware\597\2019            | Import from public domain | Woodard,K.; Kercher,J.; Mulhejra,N.; Webby,R.                                                                                                                                                                                |
| EP178951  | NS | United States | 2019-May-20 | EP_10_305800    | A\herring.gpl\Delaware\597\2019            | Import from public domain | Woodard,K.; Kercher,J.; Mulhejra,N.; Webby,R.                                                                                                                                                                                |
| EP178947  | MP | United States | 2019-May-20 | EP_10_305799    | A\herring.gpl\Delaware\608\2019            | Import from public domain | Woodard,K.; Kercher,J.; Mulhejra,N.; Webby,R.                                                                                                                                                                                |
| EP178949  | NS | United States | 2019-May-20 | EP_10_305799    | A\herring.gpl\Delaware\608\2019            | Import from public domain | Woodard,K.; Kercher,J.; Mulhejra,N.; Webby,R.                                                                                                                                                                                |
| EP178944  | NP | United States | 2019-May-20 | EP_10_305799    | A\herring.gpl\Delaware\608\2019            | Import from public domain | Woodard,K.; Kercher,J.; Mulhejra,N.; Webby,R.                                                                                                                                                                                |
| EP154879  | NS | United States | 2014-May-19 | EP_10_378352    | A\herring.gpl\Delaware Bay\22\2014         | Import from public domain | Huku,T.; Friedman,K.; Chu,X.; Kim,D.-K.; Hason,J.; Kraus,S.; Bahj.                                                                                                                                                           |
| EP154878  | NP | United States | 2014-May-19 | EP_10_378352    | A\herring.gpl\Delaware Bay\22\2014         | Import from public domain | Huku,T.; Friedman,K.; Chu,X.; Kim,D.-K.; Hason,J.; Kraus,S.; Bahj.                                                                                                                                                           |
| EP154970  | MP | United States | 2014-May-19 | EP_10_378352    | A\herring.gpl\Delaware Bay\22\2014         | Import from public domain | Huku,T.; Friedman,K.; Chu,X.; Kim,D.-K.; Hason,J.; Kraus,S.; Bahj.                                                                                                                                                           |
| EP154954  | NP | China         | 2013-Oct-01 | EP_10_378286    | A\mallard\Delian\02-117\2013               | Import from public domain | Fan,S.; Gao,X.; Wang,T.; Sun,W.; Ying,Y.; Liu,X.; Zhao,Y.; Tang,S.; Gao,Y.; Xia,X.                                                                                                                                           |
| EP154956  | MP | China         | 2013-Oct-01 | EP_10_378286    | A\mallard\Delian\02-117\2013               | Import from public domain | Fan,S.; Gao,X.; Wang,T.; Sun,W.; Ying,Y.; Liu,X.; Zhao,Y.; Tang,S.; Gao,Y.; Xia,X.                                                                                                                                           |
| EP154957  | NS | China         | 2013-Oct-01 | EP_10_378286    | A\mallard\Delian\02-117\2013               | Import from public domain | Fan,S.; Gao,X.; Wang,T.; Sun,W.; Ying,Y.; Liu,X.; Zhao,Y.; Tang,S.; Gao,Y.; Xia,X.                                                                                                                                           |
| EP163965  | NS | China         | 2014-Oct-18 | EP_10_397343    | A\Turaxian curlow\Usamng\Zn-180\2014       | Import from public domain | Gao,X.                                                                                                                                                                                                                       |
| EP163962  | NP | China         | 2014-Oct-18 | EP_10_397343    | A\Turaxian curlow\Usamng\Zn-180\2014       | Import from public domain | Gao,X.                                                                                                                                                                                                                       |
| EP163964  | MP | China         | 2014-Oct-18 | EP_10_397343    | A\Turaxian curlow\Usamng\Zn-180\2014       | Import from public domain | Gao,X.                                                                                                                                                                                                                       |
| EP163967  | NS | China         | 2014-Oct-18 | EP_10_397342    | A\Turaxian curlow\Usamng\Zn-180\2014       | Import from public domain | Gao,X.                                                                                                                                                                                                                       |
| EP163964  | NP | China         | 2014-Oct-18 | EP_10_397342    | A\Turaxian curlow\Usamng\Zn-180\2014       | Import from public domain | Gao,X.                                                                                                                                                                                                                       |
| EP163966  | MP | China         | 2014-Oct-18 | EP_10_397342    | A\Turaxian curlow\Usamng\Zn-180\2014       | Import from public domain | Gao,X.                                                                                                                                                                                                                       |
| EP2142813 | NP | United States | 2019-Sep-24 | EP_10_14767366  | A\glaucous-winged.gpl\Alaska\A19-098\2019  | Import from public domain | Reeves,A.B.; Ramey,A.M.; Paulsen,R.L.; Stalkovich,D.E.                                                                                                                                                                       |
| EP2142815 | MP | United States | 2019-Sep-24 | EP_10_14767366  | A\glaucous-winged.gpl\Alaska\A19-098\2019  | Import from public domain | Reeves,A.B.; Ramey,A.M.; Paulsen,R.L.; Stalkovich,D.E.                                                                                                                                                                       |
| EP2142816 | NS | United States | 2019-Sep-24 | EP_10_14767366  | A\glaucous-winged.gpl\Alaska\A19-098\2019  | Import from public domain | Reeves,A.B.; Ramey,A.M.; Paulsen,R.L.; Stalkovich,D.E.                                                                                                                                                                       |
| EP2142805 | NP | United States | 2019-Sep-24 | EP_10_14767365  | A\glaucous-winged.gpl\Alaska\A19-091\2019  | Import from public domain | Reeves,A.B.; Ramey,A.M.; Paulsen,R.L.; Stalkovich,D.E.                                                                                                                                                                       |
| EP2142808 | NS | United States | 2019-Sep-24 | EP_10_14767365  | A\glaucous-winged.gpl\Alaska\A19-091\2019  | Import from public domain | Reeves,A.B.; Ramey,A.M.; Paulsen,R.L.; Stalkovich,D.E.                                                                                                                                                                       |
| EP2142807 | MP | United States | 2019-Sep-24 | EP_10_14767365  | A\glaucous-winged.gpl\Alaska\A19-091\2019  | Import from public domain | Reeves,A.B.; Ramey,A.M.; Paulsen,R.L.; Stalkovich,D.E.                                                                                                                                                                       |
| EP2142800 | NS | United States | 2019-Sep-24 | EP_10_14767322  | A\glaucous-winged.gpl\Alaska\A19-082\2019  | Import from public domain | Reeves,A.B.; Ramey,A.M.; Paulsen,R.L.; Stalkovich,D.E.                                                                                                                                                                       |
| EP2142797 | NP | United States | 2019-Sep-24 | EP_10_14767322  | A\glaucous-winged.gpl\Alaska\A19-082\2019  | Import from public domain | Reeves,A.B.; Ramey,A.M.; Paulsen,R.L.; Stalkovich,D.E.                                                                                                                                                                       |
| EP2142799 | MP | United States | 2019-Sep-24 | EP_10_14767322  | A\glaucous-winged.gpl\Alaska\A19-082\2019  | Import from public domain | Reeves,A.B.; Ramey,A.M.; Paulsen,R.L.; Stalkovich,D.E.                                                                                                                                                                       |
| EP2142789 | NP | United States | 2018-Sep-25 | EP_10_14767321  | A\glaucous-winged.gpl\Alaska\A18-288\2018  | Import from public domain | Reeves,A.B.; Ramey,A.M.; Paulsen,R.L.; Stalkovich,D.E.                                                                                                                                                                       |
| EP2142791 | MP | United States | 2018-Sep-25 | EP_10_14767321  | A\glaucous-winged.gpl\Alaska\A18-288\2018  | Import from public domain | Reeves,A.B.; Ramey,A.M.; Paulsen,R.L.; Stalkovich,D.E.                                                                                                                                                                       |
| EP2142792 | NS | United States | 2018-Sep-25 | EP_10_14767321  | A\glaucous-winged.gpl\Alaska\A18-288\2018  | Import from public domain | Reeves,A.B.; Ramey,A.M.; Paulsen,R.L.; Stalkovich,D.E.                                                                                                                                                                       |
| EP2403229 | MP | United States | 2022-May-31 | EP_10_168020549 | A\Red Irovi\Delaware\1087\2022             | Import from public domain | Direct Submission                                                                                                                                                                                                            |
| EP2403227 | NS | United States | 2022-May-31 | EP_10_168020549 | A\Red Irovi\Delaware\1087\2022             | Import from public domain | Direct Submission                                                                                                                                                                                                            |
| EP2403230 | NP | United States | 2022-May-31 | EP_10_168020549 | A\Red Irovi\Delaware\1087\2022             | Import from public domain | Direct Submission                                                                                                                                                                                                            |

|            |    |               |             |                |                                  |                           |                                                                  |
|------------|----|---------------|-------------|----------------|----------------------------------|---------------------------|------------------------------------------------------------------|
| EP1205457  | NS | United States | 2022-May-31 | EP_10_16919118 | A/Red Knot/Delaware/1058/2022    | Import from public domain | Direct Submission                                                |
| EP1205459  | MP | United States | 2022-May-31 | EP_10_16919118 | A/Red Knot/Delaware/1058/2022    | Import from public domain | Direct Submission                                                |
| EP1205460  | NP | United States | 2022-May-31 | EP_10_16919118 | A/Red Knot/Delaware/1058/2022    | Import from public domain | Direct Submission                                                |
| EP12147876 | MP | United States | 2021-Jun-01 | EP_10_14777719 | A/Red Knot/Delaware/224/2021     | Import from public domain | Direct Submission                                                |
| EP12147877 | NP | United States | 2021-Jun-01 | EP_10_14777719 | A/Red Knot/Delaware/224/2021     | Import from public domain | Direct Submission                                                |
| EP12147878 | NS | United States | 2021-Jun-01 | EP_10_14777719 | A/Red Knot/Delaware/224/2021     | Import from public domain | Direct Submission                                                |
| EP11894736 | MP | United States | 2020-May-29 | EP_10_4061163  | A/Red Knot/Delaware Bay/620/2020 | Import from public domain | Direct Submission                                                |
| EP11894735 | NP | United States | 2020-May-29 | EP_10_4061163  | A/Red Knot/Delaware Bay/620/2020 | Import from public domain | Direct Submission                                                |
| EP11894734 | NS | United States | 2020-May-29 | EP_10_4061163  | A/Red Knot/Delaware Bay/620/2020 | Import from public domain | Direct Submission                                                |
| EP11894735 | MP | United States | 2020-May-29 | EP_10_4056657  | A/Red Knot/Delaware Bay/620/2020 | Import from public domain | Direct Submission                                                |
| EP11894738 | NS | United States | 2020-May-29 | EP_10_4056657  | A/Red Knot/Delaware Bay/620/2020 | Import from public domain | Direct Submission                                                |
| EP11894739 | NP | United States | 2020-May-29 | EP_10_4056657  | A/Red Knot/Delaware Bay/620/2020 | Import from public domain | Direct Submission                                                |
| EP1203144  | MP | United States | 2022-May-31 | EP_10_16920538 | A/Standing/Delaware/192/2022     | Import from public domain | Direct Submission                                                |
| EP1203146  | NP | United States | 2022-May-31 | EP_10_16920538 | A/Standing/Delaware/192/2022     | Import from public domain | Direct Submission                                                |
| EP1203147  | NS | United States | 2022-May-31 | EP_10_16920538 | A/Standing/Delaware/192/2022     | Import from public domain | Direct Submission                                                |
| EP11301114 | NS | Chile         | 2016-Dec-13 | EP_10_327600   | A/Whimbrel/Chile/C20073/2016     | Import from public domain | Bravo-Vasquez,N; Bahf,J; Hamilton-Wood,C; Schultz-Cherry,S       |
| EP11301122 | NP | Chile         | 2016-Dec-13 | EP_10_327600   | A/Whimbrel/Chile/C20073/2016     | Import from public domain | Bravo-Vasquez,N; Bahf,J; Hamilton-Wood,C; Schultz-Cherry,S       |
| EP11301139 | MP | Chile         | 2016-Dec-13 | EP_10_327600   | A/Whimbrel/Chile/C20073/2016     | Import from public domain | Bravo-Vasquez,N; Bahf,J; Hamilton-Wood,C; Schultz-Cherry,S       |
| EP11301125 | NP | Chile         | 2016-Dec-13 | EP_10_327599   | A/Whimbrel/Chile/C20075/2016     | Import from public domain | Bravo-Vasquez,N; Bahf,J; Hamilton-Wood,C; Schultz-Cherry,S       |
| EP11301136 | NS | Chile         | 2016-Dec-13 | EP_10_327599   | A/Whimbrel/Chile/C20075/2016     | Import from public domain | Bravo-Vasquez,N; Bahf,J; Hamilton-Wood,C; Schultz-Cherry,S       |
| EP11301145 | MP | Chile         | 2016-Dec-13 | EP_10_327599   | A/Whimbrel/Chile/C20075/2016     | Import from public domain | Bravo-Vasquez,N; Bahf,J; Hamilton-Wood,C; Schultz-Cherry,S       |
| EP11301106 | MP | Chile         | 2016-Dec-13 | EP_10_327598   | A/Whimbrel/Chile/C20106/2016     | Import from public domain | Bravo-Vasquez,N; Bahf,J; Hamilton-Wood,C; Schultz-Cherry,S       |
| EP11301107 | NS | Chile         | 2016-Dec-13 | EP_10_327598   | A/Whimbrel/Chile/C20106/2016     | Import from public domain | Bravo-Vasquez,N; Bahf,J; Hamilton-Wood,C; Schultz-Cherry,S       |
| EP11301115 | NP | Chile         | 2016-Dec-13 | EP_10_327598   | A/Whimbrel/Chile/C20106/2016     | Import from public domain | Bravo-Vasquez,N; Bahf,J; Hamilton-Wood,C; Schultz-Cherry,S       |
| EP11301094 | NP | Chile         | 2016-Dec-13 | EP_10_327597   | A/Whimbrel/Chile/C20144/2016     | Import from public domain | Bravo-Vasquez,N; Bahf,J; Hamilton-Wood,C; Schultz-Cherry,S       |
| EP11301113 | MP | Chile         | 2016-Dec-13 | EP_10_327597   | A/Whimbrel/Chile/C20144/2016     | Import from public domain | Bravo-Vasquez,N; Bahf,J; Hamilton-Wood,C; Schultz-Cherry,S       |
| EP11301121 | NS | Chile         | 2016-Dec-13 | EP_10_327597   | A/Whimbrel/Chile/C20144/2016     | Import from public domain | Bravo-Vasquez,N; Bahf,J; Hamilton-Wood,C; Schultz-Cherry,S       |
| EP11301091 | MP | Chile         | 2016-Dec-13 | EP_10_327595   | A/Whimbrel/Chile/C108147/2016    | Import from public domain | Bravo-Vasquez,N; Bahf,J; Hamilton-Wood,C; Schultz-Cherry,S       |
| EP11301100 | NS | Chile         | 2016-Dec-13 | EP_10_327595   | A/Whimbrel/Chile/C108147/2016    | Import from public domain | Bravo-Vasquez,N; Bahf,J; Hamilton-Wood,C; Schultz-Cherry,S       |
| EP11301095 | NP | Chile         | 2016-Dec-13 | EP_10_327595   | A/Whimbrel/Chile/C108147/2016    | Import from public domain | Bravo-Vasquez,N; Bahf,J; Hamilton-Wood,C; Schultz-Cherry,S       |
| EP11298543 | NS | Chile         | 2016-Apr-27 | EP_10_328975   | A/Whimbrel/Chile/C10814/2016     | Import from public domain | Jemena-Blaehn,P; Hamilton,C; van Bakel,N; RH/D; Schultz-Cherry,S |
| EP11298575 | MP | Chile         | 2016-Apr-27 | EP_10_328975   | A/Whimbrel/Chile/C10814/2016     | Import from public domain | Jemena-Blaehn,P; Hamilton,C; van Bakel,N; RH/D; Schultz-Cherry,S |
| EP11298479 | NP | Chile         | 2016-Apr-27 | EP_10_328975   | A/Whimbrel/Chile/C10814/2016     | Import from public domain | Jemena-Blaehn,P; Hamilton,C; van Bakel,N; RH/D; Schultz-Cherry,S |
| EP11298530 | NP | Chile         | 2016-May-31 | EP_10_328973   | A/Whimbrel/Chile/C12523/2016     | Import from public domain | Jemena-Blaehn,P; Hamilton,C; van Bakel,N; RH/D; Schultz-Cherry,S |
| EP11298551 | MP | Chile         | 2016-May-31 | EP_10_328973   | A/Whimbrel/Chile/C12523/2016     | Import from public domain | Jemena-Blaehn,P; Hamilton,C; van Bakel,N; RH/D; Schultz-Cherry,S |

|           |    |             |             |               |                                                |                                        |                                                     |                                                                                                  |
|-----------|----|-------------|-------------|---------------|------------------------------------------------|----------------------------------------|-----------------------------------------------------|--------------------------------------------------------------------------------------------------|
| EP128495  | NS | Chile       | 2016-May-31 | EP_15_128973  | A/Whitmore/Chile/C12523/2016                   |                                        | Import from public domain                           | Jeanne-Blaize,F, Henshen,C.,van Bavel,H, RHD, Schuller-Cherry,S                                  |
| EP1342891 | NP | Belgium     | 2021-Dec-09 | EP_15_1622539 | A/Chroicocephalus_rilobundus/Belgium/2466/2020 | Sciensano - Animal Infectious Diseases | Sciensano, Department of Animal Infectious Diseases | Van Borm, Steven; Vandenbussche, Frank; Rogier, Virginie; Lambrecht, Benedicte; Steensels, Mieke |
| EP1342893 | MP | Belgium     | 2021-Dec-09 | EP_15_1622539 | A/Chroicocephalus_rilobundus/Belgium/2466/2020 | Sciensano - Animal Infectious Diseases | Sciensano, Department of Animal Infectious Diseases | Van Borm, Steven; Vandenbussche, Frank; Rogier, Virginie; Lambrecht, Benedicte; Steensels, Mieke |
| EP1342894 | NS | Belgium     | 2021-Dec-09 | EP_15_1622539 | A/Chroicocephalus_rilobundus/Belgium/2466/2020 | Sciensano - Animal Infectious Diseases | Sciensano, Department of Animal Infectious Diseases | Van Borm, Steven; Vandenbussche, Frank; Rogier, Virginie; Lambrecht, Benedicte; Steensels, Mieke |
| EP1327597 | NS | Netherlands | 2016-Jul-11 | EP_15_129049  | A/black-headed gull/Netherlands/11/2014        |                                        | Import from public domain                           | Poem,M.J., Verhagen,J.H., Voong,D.; Scheun,R.D.; Faaij,S.D.; Fouchier,B.A.M.                     |
| EP1327602 | NP | Netherlands | 2016-Jul-11 | EP_15_129049  | A/black-headed gull/Netherlands/11/2014        |                                        | Import from public domain                           | Poem,M.J., Verhagen,J.H., Voong,D.; Scheun,R.D.; Faaij,S.D.; Fouchier,B.A.M.                     |
| EP1327605 | MP | Netherlands | 2016-Jul-11 | EP_15_129049  | A/black-headed gull/Netherlands/11/2014        |                                        | Import from public domain                           | Poem,M.J., Verhagen,J.H., Voong,D.; Scheun,R.D.; Faaij,S.D.; Fouchier,B.A.M.                     |
| EP1327601 | NS | Netherlands | 2016-Jul-24 | EP_15_129047  | A/black-headed gull/Netherlands/16/2014        |                                        | Import from public domain                           | Poem,M.J., Verhagen,J.H., Voong,D.; Scheun,R.D.; Faaij,S.D.; Fouchier,B.A.M.                     |
| EP1327600 | NP | Netherlands | 2016-Jul-24 | EP_15_129047  | A/black-headed gull/Netherlands/16/2014        |                                        | Import from public domain                           | Poem,M.J., Verhagen,J.H., Voong,D.; Scheun,R.D.; Faaij,S.D.; Fouchier,B.A.M.                     |
| EP1327603 | MP | Netherlands | 2016-Jul-24 | EP_15_129047  | A/black-headed gull/Netherlands/16/2014        |                                        | Import from public domain                           | Poem,M.J., Verhagen,J.H., Voong,D.; Scheun,R.D.; Faaij,S.D.; Fouchier,B.A.M.                     |
| EP1327605 | NP | Netherlands | 2016-Jul-11 | EP_15_129046  | A/black-headed gull/Netherlands/14/2014        |                                        | Import from public domain                           | Poem,M.J., Verhagen,J.H., Voong,D.; Scheun,R.D.; Faaij,S.D.; Fouchier,B.A.M.                     |
| EP1327606 | NS | Netherlands | 2016-Jul-11 | EP_15_129046  | A/black-headed gull/Netherlands/14/2014        |                                        | Import from public domain                           | Poem,M.J., Verhagen,J.H., Voong,D.; Scheun,R.D.; Faaij,S.D.; Fouchier,B.A.M.                     |
| EP1327607 | MP | Netherlands | 2016-Jul-11 | EP_15_129046  | A/black-headed gull/Netherlands/14/2014        |                                        | Import from public domain                           | Poem,M.J., Verhagen,J.H., Voong,D.; Scheun,R.D.; Faaij,S.D.; Fouchier,B.A.M.                     |
| EP1327676 | MP | Netherlands | 2016-Jul-11 | EP_15_129045  | A/black-headed gull/Netherlands/13/2014        |                                        | Import from public domain                           | Poem,M.J., Verhagen,J.H., Voong,D.; Scheun,R.D.; Faaij,S.D.; Fouchier,B.A.M.                     |
| EP1327684 | NP | Netherlands | 2016-Jul-11 | EP_15_129045  | A/black-headed gull/Netherlands/13/2014        |                                        | Import from public domain                           | Poem,M.J., Verhagen,J.H., Voong,D.; Scheun,R.D.; Faaij,S.D.; Fouchier,B.A.M.                     |
| EP1327649 | NS | Netherlands | 2016-Jul-11 | EP_15_129045  | A/black-headed gull/Netherlands/13/2014        |                                        | Import from public domain                           | Poem,M.J., Verhagen,J.H., Voong,D.; Scheun,R.D.; Faaij,S.D.; Fouchier,B.A.M.                     |
| EP1327672 | NP | Netherlands | 2016-Jul-09 | EP_15_129044  | A/black-headed gull/Netherlands/4/2014         |                                        | Import from public domain                           | Poem,M.J., Verhagen,J.H., Voong,D.; Scheun,R.D.; Faaij,S.D.; Fouchier,B.A.M.                     |
| EP1327687 | NS | Netherlands | 2016-Jul-09 | EP_15_129044  | A/black-headed gull/Netherlands/4/2014         |                                        | Import from public domain                           | Poem,M.J., Verhagen,J.H., Voong,D.; Scheun,R.D.; Faaij,S.D.; Fouchier,B.A.M.                     |
| EP1327651 | MP | Netherlands | 2016-Jul-09 | EP_15_129044  | A/black-headed gull/Netherlands/4/2014         |                                        | Import from public domain                           | Poem,M.J., Verhagen,J.H., Voong,D.; Scheun,R.D.; Faaij,S.D.; Fouchier,B.A.M.                     |
| EP1327174 | NP | Netherlands | 2016-Jul-15 | EP_15_128991  | A/black-headed gull/Netherlands/1/2016         |                                        | Import from public domain                           | Poem,M.J., Verhagen,J.H., Voong,D.; Scheun,R.D.; Faaij,S.D.; Fouchier,B.A.M.                     |
| EP1327182 | MP | Netherlands | 2016-Jul-15 | EP_15_128991  | A/black-headed gull/Netherlands/1/2016         |                                        | Import from public domain                           | Poem,M.J., Verhagen,J.H., Voong,D.; Scheun,R.D.; Faaij,S.D.; Fouchier,B.A.M.                     |
| EP1327189 | NS | Netherlands | 2016-Jul-15 | EP_15_128991  | A/black-headed gull/Netherlands/1/2016         |                                        | Import from public domain                           | Poem,M.J., Verhagen,J.H., Voong,D.; Scheun,R.D.; Faaij,S.D.; Fouchier,B.A.M.                     |
| EP1327166 | MP | Netherlands | 2016-Aug-06 | EP_15_128990  | A/black-headed gull/Netherlands/10/2016        |                                        | Import from public domain                           | Poem,M.J., Verhagen,J.H., Voong,D.; Scheun,R.D.; Faaij,S.D.; Fouchier,B.A.M.                     |
| EP1327181 | NP | Netherlands | 2016-Aug-06 | EP_15_128990  | A/black-headed gull/Netherlands/10/2016        |                                        | Import from public domain                           | Poem,M.J., Verhagen,J.H., Voong,D.; Scheun,R.D.; Faaij,S.D.; Fouchier,B.A.M.                     |
| EP1327188 | NS | Netherlands | 2016-Aug-06 | EP_15_128990  | A/black-headed gull/Netherlands/10/2016        |                                        | Import from public domain                           | Poem,M.J., Verhagen,J.H., Voong,D.; Scheun,R.D.; Faaij,S.D.; Fouchier,B.A.M.                     |
| EP1327195 | NS | Netherlands | 2016-Jul-15 | EP_15_128989  | A/black-headed gull/Netherlands/2/2016         |                                        | Import from public domain                           | Poem,M.J., Verhagen,J.H., Voong,D.; Scheun,R.D.; Faaij,S.D.; Fouchier,B.A.M.                     |
| EP1327163 | MP | Netherlands | 2016-Jul-15 | EP_15_128989  | A/black-headed gull/Netherlands/2/2016         |                                        | Import from public domain                           | Poem,M.J., Verhagen,J.H., Voong,D.; Scheun,R.D.; Faaij,S.D.; Fouchier,B.A.M.                     |
| EP1327172 | NP | Netherlands | 2016-Jul-15 | EP_15_128989  | A/black-headed gull/Netherlands/2/2016         |                                        | Import from public domain                           | Poem,M.J., Verhagen,J.H., Voong,D.; Scheun,R.D.; Faaij,S.D.; Fouchier,B.A.M.                     |
| EP1327161 | MP | Netherlands | 2016-Aug-06 | EP_15_128988  | A/black-headed gull/Netherlands/11/2016        |                                        | Import from public domain                           | Poem,M.J., Verhagen,J.H., Voong,D.; Scheun,R.D.; Faaij,S.D.; Fouchier,B.A.M.                     |
| EP1327175 | NP | Netherlands | 2016-Aug-06 | EP_15_128988  | A/black-headed gull/Netherlands/11/2016        |                                        | Import from public domain                           | Poem,M.J., Verhagen,J.H., Voong,D.; Scheun,R.D.; Faaij,S.D.; Fouchier,B.A.M.                     |
| EP1327187 | NS | Netherlands | 2016-Aug-06 | EP_15_128988  | A/black-headed gull/Netherlands/11/2016        |                                        | Import from public domain                           | Poem,M.J., Verhagen,J.H., Voong,D.; Scheun,R.D.; Faaij,S.D.; Fouchier,B.A.M.                     |
| EP1327133 | MP | Netherlands | 2016-Aug-06 | EP_15_128984  | A/black-headed gull/Netherlands/8/2016         |                                        | Import from public domain                           | Poem,M.J., Verhagen,J.H., Voong,D.; Scheun,R.D.; Faaij,S.D.; Fouchier,B.A.M.                     |
| EP1327139 | NS | Netherlands | 2016-Aug-06 | EP_15_128984  | A/black-headed gull/Netherlands/8/2016         |                                        | Import from public domain                           | Poem,M.J., Verhagen,J.H., Voong,D.; Scheun,R.D.; Faaij,S.D.; Fouchier,B.A.M.                     |
| EP1327111 | NP | Netherlands | 2016-Aug-06 | EP_15_128984  | A/black-headed gull/Netherlands/8/2016         |                                        | Import from public domain                           | Poem,M.J., Verhagen,J.H., Voong,D.; Scheun,R.D.; Faaij,S.D.; Fouchier,B.A.M.                     |
| EP1327126 | MP | Netherlands | 2016-Jul-15 | EP_15_128983  | A/black-headed gull/Netherlands/6/2016         |                                        | Import from public domain                           | Poem,M.J., Verhagen,J.H., Voong,D.; Scheun,R.D.; Faaij,S.D.; Fouchier,B.A.M.                     |

|           |    |             |             |              |                                         |                           |                                                                          |
|-----------|----|-------------|-------------|--------------|-----------------------------------------|---------------------------|--------------------------------------------------------------------------|
| EP1307131 | NS | Netherlands | 2016-Jul-15 | EP_15_328983 | A/black-headed-gull/Netherlands/2/2016  | Import from public domain | Poem,M.J.; Verhagen,J.H.; Voong,D.; Schwan,R.D.; Paas,D.; Foucher,B.A.M. |
| EP1307140 | NP | Netherlands | 2016-Jul-15 | EP_15_328983 | A/black-headed-gull/Netherlands/8/2016  | Import from public domain | Poem,M.J.; Verhagen,J.H.; Voong,D.; Schwan,R.D.; Paas,D.; Foucher,B.A.M. |
| EP1307130 | NP | Netherlands | 2016-Jul-15 | EP_15_328983 | A/black-headed-gull/Netherlands/3/2016  | Import from public domain | Poem,M.J.; Verhagen,J.H.; Voong,D.; Schwan,R.D.; Paas,D.; Foucher,B.A.M. |
| EP1307102 | MP | Netherlands | 2016-Jul-15 | EP_15_328983 | A/black-headed-gull/Netherlands/12/2016 | Import from public domain | Poem,M.J.; Verhagen,J.H.; Voong,D.; Schwan,R.D.; Paas,D.; Foucher,B.A.M. |
| EP1307159 | NS | Netherlands | 2016-Jul-15 | EP_15_328983 | A/black-headed-gull/Netherlands/13/2016 | Import from public domain | Poem,M.J.; Verhagen,J.H.; Voong,D.; Schwan,R.D.; Paas,D.; Foucher,B.A.M. |
| EP1307124 | NS | Netherlands | 2016-Jun-29 | EP_15_328980 | A/black-headed-gull/Netherlands/7/2016  | Import from public domain | Poem,M.J.; Verhagen,J.H.; Voong,D.; Schwan,R.D.; Paas,D.; Foucher,B.A.M. |
| EP1307112 | MP | Netherlands | 2016-Jun-29 | EP_15_328980 | A/black-headed-gull/Netherlands/7/2016  | Import from public domain | Poem,M.J.; Verhagen,J.H.; Voong,D.; Schwan,R.D.; Paas,D.; Foucher,B.A.M. |
| EP1307114 | NP | Netherlands | 2016-Jun-29 | EP_15_328980 | A/black-headed-gull/Netherlands/7/2016  | Import from public domain | Poem,M.J.; Verhagen,J.H.; Voong,D.; Schwan,R.D.; Paas,D.; Foucher,B.A.M. |
| EP1307093 | NP | Netherlands | 2016-Aug-06 | EP_15_328978 | A/black-headed-gull/Netherlands/9/2016  | Import from public domain | Poem,M.J.; Verhagen,J.H.; Voong,D.; Schwan,R.D.; Paas,D.; Foucher,B.A.M. |
| EP1307096 | NS | Netherlands | 2016-Aug-06 | EP_15_328978 | A/black-headed-gull/Netherlands/9/2016  | Import from public domain | Poem,M.J.; Verhagen,J.H.; Voong,D.; Schwan,R.D.; Paas,D.; Foucher,B.A.M. |
| EP1307098 | MP | Netherlands | 2016-Aug-06 | EP_15_328978 | A/black-headed-gull/Netherlands/9/2016  | Import from public domain | Poem,M.J.; Verhagen,J.H.; Voong,D.; Schwan,R.D.; Paas,D.; Foucher,B.A.M. |
| EP1014017 | NS | Netherlands | 2014-Jun-17 | EP_15_267793 | A/black-headed-gull/Netherlands/13/2014 | Import from public domain |                                                                          |
| EP1014138 | NP | Netherlands | 2014-Jun-17 | EP_15_267793 | A/black-headed-gull/Netherlands/13/2014 | Import from public domain |                                                                          |
| EP1014702 | MP | Netherlands | 2014-Jun-17 | EP_15_267793 | A/black-headed-gull/Netherlands/13/2014 | Import from public domain |                                                                          |
| EP1014490 | NP | Netherlands | 2013-Jul-17 | EP_15_267789 | A/black-headed-gull/Netherlands/8/2013  | Import from public domain |                                                                          |
| EP1014802 | NS | Netherlands | 2013-Jul-17 | EP_15_267789 | A/black-headed-gull/Netherlands/8/2013  | Import from public domain |                                                                          |
| EP1014896 | MP | Netherlands | 2013-Jul-17 | EP_15_267789 | A/black-headed-gull/Netherlands/8/2013  | Import from public domain |                                                                          |
| EP1020406 | NS | Netherlands | 2014-Dec-24 | EP_15_267770 | A/black-headed-gull/Netherlands/18/2014 | Import from public domain |                                                                          |
| EP1013701 | NP | Netherlands | 2014-Dec-24 | EP_15_267770 | A/black-headed-gull/Netherlands/18/2014 | Import from public domain |                                                                          |
| EP1013880 | MP | Netherlands | 2014-Dec-24 | EP_15_267770 | A/black-headed-gull/Netherlands/18/2014 | Import from public domain |                                                                          |
| EP1013175 | NS | Netherlands | 2014-Jun-23 | EP_15_267768 | A/black-headed-gull/Netherlands/7/2014  | Import from public domain |                                                                          |
| EP1013740 | NP | Netherlands | 2014-Jun-23 | EP_15_267768 | A/black-headed-gull/Netherlands/7/2014  | Import from public domain |                                                                          |
| EP1013166 | MP | Netherlands | 2014-Jun-23 | EP_15_267768 | A/black-headed-gull/Netherlands/7/2014  | Import from public domain |                                                                          |
| EP1011079 | NS | Netherlands | 2014-Jul-09 | EP_15_267413 | A/black-headed-gull/Netherlands/9/2014  | Import from public domain |                                                                          |
| EP1014509 | MP | Netherlands | 2014-Jul-09 | EP_15_267413 | A/black-headed-gull/Netherlands/9/2014  | Import from public domain |                                                                          |
| EP1014596 | NP | Netherlands | 2014-Jul-09 | EP_15_267413 | A/black-headed-gull/Netherlands/9/2014  | Import from public domain |                                                                          |
| EP1011073 | MP | Netherlands | 2013-Jul-06 | EP_15_267411 | A/black-headed-gull/Netherlands/8/2013  | Import from public domain |                                                                          |
| EP1014063 | NP | Netherlands | 2013-Jul-06 | EP_15_267411 | A/black-headed-gull/Netherlands/8/2013  | Import from public domain |                                                                          |
| EP1011378 | NS | Netherlands | 2013-Jul-06 | EP_15_267411 | A/black-headed-gull/Netherlands/8/2013  | Import from public domain |                                                                          |
| EP1020822 | NS | Netherlands | 2014-Jul-11 | EP_15_267343 | A/black-headed-gull/Netherlands/14/2014 | Import from public domain |                                                                          |
| EP1020021 | MP | Netherlands | 2014-Jul-11 | EP_15_267343 | A/black-headed-gull/Netherlands/14/2014 | Import from public domain |                                                                          |
| EP1013341 | NP | Netherlands | 2014-Jul-11 | EP_15_267343 | A/black-headed-gull/Netherlands/14/2014 | Import from public domain |                                                                          |
| EP1020740 | MP | Netherlands | 2013-Jul-17 | EP_15_267305 | A/black-headed-gull/Netherlands/9/2013  | Import from public domain |                                                                          |
| EP1013333 | NS | Netherlands | 2013-Jul-17 | EP_15_267305 | A/black-headed-gull/Netherlands/9/2013  | Import from public domain |                                                                          |
| EP1014170 | NP | Netherlands | 2013-Jul-17 | EP_15_267305 | A/black-headed-gull/Netherlands/9/2013  | Import from public domain |                                                                          |





|            |    |               |             |              |                                               |                                   |                                                                                                                                    |                                                                                                                                         |
|------------|----|---------------|-------------|--------------|-----------------------------------------------|-----------------------------------|------------------------------------------------------------------------------------------------------------------------------------|-----------------------------------------------------------------------------------------------------------------------------------------|
| EP080208   | NP | Netherlands   | 2013-Jul-06 | EP_10_243447 | A/black-headed gull/Netherlands/7/2013        | Import from public domain         | Penn,M.J.; Verhagen,J.H.; Voong,D.; Schuur,R.D.; Paai,S.D.; Fouchier,B.A.M.                                                        |                                                                                                                                         |
| EP080805   | MP | Netherlands   | 2013-Jul-06 | EP_10_243447 | A/black-headed gull/Netherlands/7/2013        | Import from public domain         | Penn,M.J.; Verhagen,J.H.; Voong,D.; Schuur,R.D.; Paai,S.D.; Fouchier,B.A.M.                                                        |                                                                                                                                         |
| EP080903   | NP | Netherlands   | 2014-Jun-23 | EP_10_243443 | A/black-headed gull/Netherlands/11/2014       | Import from public domain         | Penn,M.J.; Verhagen,J.H.; Voong,D.; Schuur,R.D.; Paai,S.D.; Fouchier,B.A.M.                                                        |                                                                                                                                         |
| EP080205   | NS | Netherlands   | 2014-Jun-23 | EP_10_243443 | A/black-headed gull/Netherlands/11/2014       | Import from public domain         | Penn,M.J.; Verhagen,J.H.; Voong,D.; Schuur,R.D.; Paai,S.D.; Fouchier,B.A.M.                                                        |                                                                                                                                         |
| EP080208   | MP | Netherlands   | 2014-Jun-23 | EP_10_243443 | A/black-headed gull/Netherlands/11/2014       | Import from public domain         | Penn,M.J.; Verhagen,J.H.; Voong,D.; Schuur,R.D.; Paai,S.D.; Fouchier,B.A.M.                                                        |                                                                                                                                         |
| EP080616   | NP | Netherlands   | 2014-Jul-11 | EP_10_243437 | A/black-headed gull/Netherlands/12/2014       | Import from public domain         | Penn,M.J.; Verhagen,J.H.; Voong,D.; Schuur,R.D.; Paai,S.D.; Fouchier,B.A.M.                                                        |                                                                                                                                         |
| EP080312   | MP | Netherlands   | 2014-Jul-11 | EP_10_243437 | A/black-headed gull/Netherlands/12/2014       | Import from public domain         | Penn,M.J.; Verhagen,J.H.; Voong,D.; Schuur,R.D.; Paai,S.D.; Fouchier,B.A.M.                                                        |                                                                                                                                         |
| EP080137   | NS | Netherlands   | 2014-Jul-11 | EP_10_243437 | A/black-headed gull/Netherlands/12/2014       | Import from public domain         | Penn,M.J.; Verhagen,J.H.; Voong,D.; Schuur,R.D.; Paai,S.D.; Fouchier,B.A.M.                                                        |                                                                                                                                         |
| EP080953   | NS | Netherlands   | 2014-Jun-23 | EP_10_243419 | A/black-headed gull/Netherlands/11/2014       | Import from public domain         | Penn,M.J.; Verhagen,J.H.; Voong,D.; Schuur,R.D.; Paai,S.D.; Fouchier,B.A.M.                                                        |                                                                                                                                         |
| EP080961   | MP | Netherlands   | 2014-Jun-23 | EP_10_243419 | A/black-headed gull/Netherlands/11/2014       | Import from public domain         | Penn,M.J.; Verhagen,J.H.; Voong,D.; Schuur,R.D.; Paai,S.D.; Fouchier,B.A.M.                                                        |                                                                                                                                         |
| EP080980   | NP | Netherlands   | 2014-Jun-23 | EP_10_243419 | A/black-headed gull/Netherlands/11/2014       | Import from public domain         | Penn,M.J.; Verhagen,J.H.; Voong,D.; Schuur,R.D.; Paai,S.D.; Fouchier,B.A.M.                                                        |                                                                                                                                         |
| EP1537037  | MP | Netherlands   | 2017-Jul-03 | EP_10_370203 | A/black-headed Gull/Netherlands/9/2017        | Import from public domain         | Penn,M.J.; Voong,D.; Schuur,R.D.; Paai,S.D.; Fouchier,B.A.M.                                                                       |                                                                                                                                         |
| EP1537008  | NP | Netherlands   | 2017-Jul-03 | EP_10_370203 | A/black-headed Gull/Netherlands/9/2017        | Import from public domain         | Penn,M.J.; Voong,D.; Schuur,R.D.; Paai,S.D.; Fouchier,B.A.M.                                                                       |                                                                                                                                         |
| EP1537009  | NS | Netherlands   | 2017-Jul-03 | EP_10_370203 | A/black-headed Gull/Netherlands/9/2017        | Import from public domain         | Penn,M.J.; Voong,D.; Schuur,R.D.; Paai,S.D.; Fouchier,B.A.M.                                                                       |                                                                                                                                         |
| EP1013920  | NS | Netherlands   | 2014-Jul-11 | EP_10_267361 | A/black-headed gull/Netherlands/10/2014       | Import from public domain         |                                                                                                                                    |                                                                                                                                         |
| EP1013148  | NP | Netherlands   | 2014-Jul-11 | EP_10_267361 | A/black-headed gull/Netherlands/10/2014       | Import from public domain         |                                                                                                                                    |                                                                                                                                         |
| EP1013699  | MP | Netherlands   | 2014-Jul-11 | EP_10_267361 | A/black-headed gull/Netherlands/10/2014       | Import from public domain         |                                                                                                                                    |                                                                                                                                         |
| EP1525211  | NP | United States | 2014-May-21 | EP_10_372111 | A/ruddy turnstone/Delaware Bay/46/2014        | Import from public domain         | Hicks,T.; Friedman,K.; Qiu,X.; Kim,D.-K.; Heaton,J.; Kraus,S.; Bahj,J.                                                             |                                                                                                                                         |
| EP1525213  | NS | United States | 2014-May-21 | EP_10_372111 | A/ruddy turnstone/Delaware Bay/46/2014        | Import from public domain         | Hicks,T.; Friedman,K.; Qiu,X.; Kim,D.-K.; Heaton,J.; Kraus,S.; Bahj,J.                                                             |                                                                                                                                         |
| EP1525215  | MP | United States | 2014-May-21 | EP_10_372111 | A/ruddy turnstone/Delaware Bay/46/2014        | Import from public domain         | Hicks,T.; Friedman,K.; Qiu,X.; Kim,D.-K.; Heaton,J.; Kraus,S.; Bahj,J.                                                             |                                                                                                                                         |
| EP1525217  | NS | United States | 2014-May-19 | EP_10_372090 | A/ruddy turnstone/Delaware Bay/46/2014        | Import from public domain         | Hicks,T.; Friedman,K.; Qiu,X.; Kim,D.-K.; Heaton,J.; Kraus,S.; Bahj,J.                                                             |                                                                                                                                         |
| EP1525218  | MP | United States | 2014-May-19 | EP_10_372090 | A/ruddy turnstone/Delaware Bay/46/2014        | Import from public domain         | Hicks,T.; Friedman,K.; Qiu,X.; Kim,D.-K.; Heaton,J.; Kraus,S.; Bahj,J.                                                             |                                                                                                                                         |
| EP15252180 | NP | United States | 2014-May-19 | EP_10_372090 | A/ruddy turnstone/Delaware Bay/46/2014        | Import from public domain         | Hicks,T.; Friedman,K.; Qiu,X.; Kim,D.-K.; Heaton,J.; Kraus,S.; Bahj,J.                                                             |                                                                                                                                         |
| EP1622928  | NS | United States | 2014-May-21 | EP_10_397706 | A/ruddy turnstone/New Jersey/UGA14-1438/2014  | Import from public domain         | Tan,G.; Pickard,B.; Fedorova,N.; Amadio,P.; Hull,C.; Christensen,J.; Miller,J.; Durkin,A.; Williams,T.; Pouchon,B.; Skillemeach,D. |                                                                                                                                         |
| EP1622925  | MP | United States | 2014-May-21 | EP_10_397706 | A/ruddy turnstone/New Jersey/UGA14-1438/2014  | Import from public domain         | Tan,G.; Pickard,B.; Fedorova,N.; Amadio,P.; Hull,C.; Christensen,J.; Miller,J.; Durkin,A.; Williams,T.; Pouchon,B.; Skillemeach,D. |                                                                                                                                         |
| EP1622927  | NP | United States | 2014-May-21 | EP_10_397706 | A/ruddy turnstone/New Jersey/UGA14-1438/2014  | Import from public domain         | Tan,G.; Pickard,B.; Fedorova,N.; Amadio,P.; Hull,C.; Christensen,J.; Miller,J.; Durkin,A.; Williams,T.; Pouchon,B.; Skillemeach,D. |                                                                                                                                         |
| EP1581795  | NS | United States | 2018-Sep-26 | EP_10_388040 | A/glaucous Gull/Northern Alaska/18A00289/2018 | Import from public domain         | Tan,G.; Fedorova,N.; Amadio,P.; Christensen,J.; Miller,J.; Durkin,A.; Williams,T.; Cadiz,C.; Bishop,M.; HEN, J.; Ransstadler,J.    |                                                                                                                                         |
| EP1581792  | MP | United States | 2018-Sep-26 | EP_10_388040 | A/glaucous Gull/Northern Alaska/18A00289/2018 | Import from public domain         | Tan,G.; Fedorova,N.; Amadio,P.; Christensen,J.; Miller,J.; Durkin,A.; Williams,T.; Cadiz,C.; Bishop,M.; HEN, J.; Ransstadler,J.    |                                                                                                                                         |
| EP1581794  | NP | United States | 2018-Sep-26 | EP_10_388040 | A/glaucous Gull/Northern Alaska/18A00289/2018 | Import from public domain         | Tan,G.; Fedorova,N.; Amadio,P.; Christensen,J.; Miller,J.; Durkin,A.; Williams,T.; Cadiz,C.; Bishop,M.; HEN, J.; Ransstadler,J.    |                                                                                                                                         |
| EP1621105  | NS | Chile         | 2016-Dec-13 | EP_10_397478 | A/white-backed stilt/Chile/C2009Q/2016        | Import from public domain         | Bravo-Vasquez,N.; Bahj,J.; Hamilton-Wend,C.; Schatz-Cherry,S.                                                                      |                                                                                                                                         |
| EP1621040  | MP | Chile         | 2016-Dec-13 | EP_10_397478 | A/white-backed stilt/Chile/C2009Q/2016        | Import from public domain         | Bravo-Vasquez,N.; Bahj,J.; Hamilton-Wend,C.; Schatz-Cherry,S.                                                                      |                                                                                                                                         |
| EP1621120  | NP | Chile         | 2016-Dec-13 | EP_10_397478 | A/white-backed stilt/Chile/C2009Q/2016        | Import from public domain         | Bravo-Vasquez,N.; Bahj,J.; Hamilton-Wend,C.; Schatz-Cherry,S.                                                                      |                                                                                                                                         |
| EP1956633  | NP | Netherlands   | 2022-Jan-03 | EP_10_805047 | A/red fox/Netherlands/2200097-004/2022        | Wageningen Bioveterinary Research | Wageningen Bioveterinary Research                                                                                                  | Beemans, Nancy; Handers, Frank; Pritz-Verschuuren, Sylvia; Rooze, Marij; Vanma, Sandra; Germeaad, Evelien; Engelen, Marc; Heurink, Rene |
| EP1956634  | NS | Netherlands   | 2022-Jan-03 | EP_10_805047 | A/red fox/Netherlands/2200097-004/2022        | Wageningen Bioveterinary Research | Wageningen Bioveterinary Research                                                                                                  | Beemans, Nancy; Handers, Frank; Pritz-Verschuuren, Sylvia; Rooze, Marij; Vanma, Sandra; Germeaad, Evelien; Engelen, Marc; Heurink, Rene |
| EP1956635  | MP | Netherlands   | 2022-Jan-03 | EP_10_805047 | A/red fox/Netherlands/2200097-004/2022        | Wageningen Bioveterinary Research | Wageningen Bioveterinary Research                                                                                                  | Beemans, Nancy; Handers, Frank; Pritz-Verschuuren, Sylvia; Rooze, Marij; Vanma, Sandra; Germeaad, Evelien; Engelen, Marc; Heurink, Rene |









|           |    |             |             |                |                                                            |                                        |                                                     |                                                                                                                                            |
|-----------|----|-------------|-------------|----------------|------------------------------------------------------------|----------------------------------------|-----------------------------------------------------|--------------------------------------------------------------------------------------------------------------------------------------------|
| EP1387657 | NP | Netherlands | 2022-Jan-28 | EP_13_10347219 | A/Bernacke Gooze/Netherlands/6/2022                        | Erasmus Medical Center                 | Erasmus Medical Center                              |                                                                                                                                            |
| EP1387658 | NS | Netherlands | 2022-Jan-28 | EP_13_10347219 | A/Bernacke Gooze/Netherlands/6/2022                        | Erasmus Medical Center                 | Erasmus Medical Center                              |                                                                                                                                            |
| EP1387659 | MP | Netherlands | 2022-Jan-28 | EP_13_10347219 | A/Bernacke Gooze/Netherlands/6/2022                        | Erasmus Medical Center                 | Erasmus Medical Center                              |                                                                                                                                            |
| EP1388030 | NP | Netherlands | 2022-Feb-02 | EP_13_10454874 | A/Bernacke gosse/Netherlands/2/2002507-002/2022            | Wageningen Bioveterinary Research      | Wageningen Bioveterinary Research                   | Beersma, Nancy; Harders, Frank; Pritz-Verschuuren, Sylvia; Rooze, Merit; Venema, Sandra; Germeaad, Evelien; Englema, Marc; Heuvelink, Rene |
| EP1388031 | NS | Netherlands | 2022-Feb-02 | EP_13_10454874 | A/Bernacke gosse/Netherlands/2/2002507-002/2022            | Wageningen Bioveterinary Research      | Wageningen Bioveterinary Research                   | Beersma, Nancy; Harders, Frank; Pritz-Verschuuren, Sylvia; Rooze, Merit; Venema, Sandra; Germeaad, Evelien; Englema, Marc; Heuvelink, Rene |
| EP1388032 | MP | Netherlands | 2022-Feb-02 | EP_13_10454874 | A/Bernacke gosse/Netherlands/2/2002507-002/2022            | Wageningen Bioveterinary Research      | Wageningen Bioveterinary Research                   | Beersma, Nancy; Harders, Frank; Pritz-Verschuuren, Sylvia; Rooze, Merit; Venema, Sandra; Germeaad, Evelien; Englema, Marc; Heuvelink, Rene |
| EP1388038 | NP | Netherlands | 2022-Feb-03 | EP_13_10454886 | A/Bernacke gosse/Netherlands/2/2002511-001/2022            | Wageningen Bioveterinary Research      | Wageningen Bioveterinary Research                   | Beersma, Nancy; Harders, Frank; Pritz-Verschuuren, Sylvia; Rooze, Merit; Venema, Sandra; Germeaad, Evelien; Englema, Marc; Heuvelink, Rene |
| EP1388039 | NS | Netherlands | 2022-Feb-03 | EP_13_10454886 | A/Bernacke gosse/Netherlands/2/2002511-001/2022            | Wageningen Bioveterinary Research      | Wageningen Bioveterinary Research                   | Beersma, Nancy; Harders, Frank; Pritz-Verschuuren, Sylvia; Rooze, Merit; Venema, Sandra; Germeaad, Evelien; Englema, Marc; Heuvelink, Rene |
| EP1388040 | MP | Netherlands | 2022-Feb-03 | EP_13_10454886 | A/Bernacke gosse/Netherlands/2/2002511-001/2022            | Wageningen Bioveterinary Research      | Wageningen Bioveterinary Research                   | Beersma, Nancy; Harders, Frank; Pritz-Verschuuren, Sylvia; Rooze, Merit; Venema, Sandra; Germeaad, Evelien; Englema, Marc; Heuvelink, Rene |
| EP1388046 | NP | Netherlands | 2022-Feb-18 | EP_13_10454887 | A/red fox/Netherlands/2/2003495-001/2022                   | Wageningen Bioveterinary Research      | Wageningen Bioveterinary Research                   | Beersma, Nancy; Harders, Frank; Pritz-Verschuuren, Sylvia; Rooze, Merit; Venema, Sandra; Germeaad, Evelien; Englema, Marc; Heuvelink, Rene |
| EP1388047 | NS | Netherlands | 2022-Feb-18 | EP_13_10454887 | A/red fox/Netherlands/2/2003495-001/2022                   | Wageningen Bioveterinary Research      | Wageningen Bioveterinary Research                   | Beersma, Nancy; Harders, Frank; Pritz-Verschuuren, Sylvia; Rooze, Merit; Venema, Sandra; Germeaad, Evelien; Englema, Marc; Heuvelink, Rene |
| EP1388048 | MP | Netherlands | 2022-Feb-18 | EP_13_10454887 | A/red fox/Netherlands/2/2003495-001/2022                   | Wageningen Bioveterinary Research      | Wageningen Bioveterinary Research                   | Beersma, Nancy; Harders, Frank; Pritz-Verschuuren, Sylvia; Rooze, Merit; Venema, Sandra; Germeaad, Evelien; Englema, Marc; Heuvelink, Rene |
| EP1388054 | MP | Germany     | 2022-Jan-25 | EP_13_10497305 | A/red knox/Germany/SH/A010102/2022                         | Landelabor Schleswig-Holstein          | Friedrich-Loeffler-Institut                         |                                                                                                                                            |
| EP1388056 | NP | Germany     | 2022-Jan-25 | EP_13_10497305 | A/red knox/Germany/SH/A010102/2022                         | Landelabor Schleswig-Holstein          | Friedrich-Loeffler-Institut                         |                                                                                                                                            |
| EP1388057 | NS | Germany     | 2022-Jan-25 | EP_13_10497305 | A/red knox/Germany/SH/A010102/2022                         | Landelabor Schleswig-Holstein          | Friedrich-Loeffler-Institut                         |                                                                                                                                            |
| EP1388065 | NS | Germany     | 2022-Feb-11 | EP_13_10497306 | A/buzzard/Germany/BB/A01112/2022                           | Landelabor Berlin-Brandenburg          | Friedrich-Loeffler-Institut                         |                                                                                                                                            |
| EP1388062 | MP | Germany     | 2022-Feb-11 | EP_13_10497306 | A/buzzard/Germany/BB/A01112/2022                           | Landelabor Berlin-Brandenburg          | Friedrich-Loeffler-Institut                         |                                                                                                                                            |
| EP1388064 | NP | Germany     | 2022-Feb-11 | EP_13_10497306 | A/buzzard/Germany/BB/A01112/2022                           | Landelabor Berlin-Brandenburg          | Friedrich-Loeffler-Institut                         |                                                                                                                                            |
| EP1388076 | NP | Belgium     | 2022-Jan-23 | EP_13_10576444 | A/Anser_anser/Belgium/3809_0002/2022                       | Scienceno - Animal Infectious Diseases | Scienceno, Department of Animal Infectious Diseases | Van Born, Steven; Rospig, Virginie; Lambrecht, Benedicte; Matthijs, Elisabeth; Smeets, Mike                                                |
| EP1388081 | NS | Belgium     | 2022-Jan-23 | EP_13_10576444 | A/Anser_anser/Belgium/3809_0002/2022                       | Scienceno - Animal Infectious Diseases | Scienceno, Department of Animal Infectious Diseases | Van Born, Steven; Rospig, Virginie; Lambrecht, Benedicte; Matthijs, Elisabeth; Smeets, Mike                                                |
| EP1388080 | MP | Belgium     | 2022-Jan-23 | EP_13_10576444 | A/Anser_anser/Belgium/3809_0002/2022                       | Scienceno - Animal Infectious Diseases | Scienceno, Department of Animal Infectious Diseases | Van Born, Steven; Rospig, Virginie; Lambrecht, Benedicte; Matthijs, Elisabeth; Smeets, Mike                                                |
| EP1390441 | NP | Netherlands | 2022-Feb-01 | EP_13_10724259 | A/hangul/Netherlands/2/2002274-002/2022                    | Wageningen Bioveterinary Research      | Wageningen Bioveterinary Research                   | Beersma, Nancy; Harders, Frank; Pritz-Verschuuren, Sylvia; Rooze, Merit; Venema, Sandra; Germeaad, Evelien; Englema, Marc; Heuvelink, Rene |
| EP1390442 | NS | Netherlands | 2022-Feb-01 | EP_13_10724259 | A/hangul/Netherlands/2/2002274-002/2022                    | Wageningen Bioveterinary Research      | Wageningen Bioveterinary Research                   | Beersma, Nancy; Harders, Frank; Pritz-Verschuuren, Sylvia; Rooze, Merit; Venema, Sandra; Germeaad, Evelien; Englema, Marc; Heuvelink, Rene |
| EP1390443 | MP | Netherlands | 2022-Feb-01 | EP_13_10724259 | A/hangul/Netherlands/2/2002274-002/2022                    | Wageningen Bioveterinary Research      | Wageningen Bioveterinary Research                   | Beersma, Nancy; Harders, Frank; Pritz-Verschuuren, Sylvia; Rooze, Merit; Venema, Sandra; Germeaad, Evelien; Englema, Marc; Heuvelink, Rene |
| EP1394430 | NP | Netherlands | 2022-Mar-01 | EP_13_10915976 | A/red fox/Netherlands/2/2004172-001/2022                   | Wageningen Bioveterinary Research      | Wageningen Bioveterinary Research                   | Beersma, Nancy; Harders, Frank; Pritz-Verschuuren, Sylvia; Rooze, Merit; Venema, Sandra; Germeaad, Evelien; Englema, Marc; Heuvelink, Rene |
| EP1394441 | MP | Netherlands | 2022-Mar-01 | EP_13_10915976 | A/red fox/Netherlands/2/2004172-001/2022                   | Wageningen Bioveterinary Research      | Wageningen Bioveterinary Research                   | Beersma, Nancy; Harders, Frank; Pritz-Verschuuren, Sylvia; Rooze, Merit; Venema, Sandra; Germeaad, Evelien; Englema, Marc; Heuvelink, Rene |
| EP1394416 | NP | Sweden      | 2022-Jan-25 | EP_13_10949057 | A/northern goshawk/Sweden/SH/A220210020305/PP000311/0-2022 | National Veterinary Institute, SVA     | National Veterinary Institute                       |                                                                                                                                            |
| EP1394418 | MP | Sweden      | 2022-Jan-25 | EP_13_10949057 | A/northern goshawk/Sweden/SH/A220210020305/PP000311/0-2022 | National Veterinary Institute, SVA     | National Veterinary Institute                       |                                                                                                                                            |
| EP1394419 | NS | Sweden      | 2022-Jan-25 | EP_13_10949057 | A/northern goshawk/Sweden/SH/A220210020305/PP000311/0-2022 | National Veterinary Institute, SVA     | National Veterinary Institute                       |                                                                                                                                            |
| EP1394402 | NP | Netherlands | 2022-Feb-12 | EP_13_10992811 | A/Mallard/Netherlands/1/2/2022                             | Erasmus Medical Center                 | Erasmus Medical Center                              |                                                                                                                                            |
| EP1394403 | NS | Netherlands | 2022-Feb-12 | EP_13_10992811 | A/Mallard/Netherlands/1/2/2022                             | Erasmus Medical Center                 | Erasmus Medical Center                              |                                                                                                                                            |
| EP1394404 | MP | Netherlands | 2022-Feb-12 | EP_13_10992811 | A/Mallard/Netherlands/1/2/2022                             | Erasmus Medical Center                 | Erasmus Medical Center                              |                                                                                                                                            |
| EP1394400 | NP | Netherlands | 2022-Feb-14 | EP_13_10993074 | A/Mallard/Netherlands/2/2022                               | Erasmus Medical Center                 | Erasmus Medical Center                              |                                                                                                                                            |
| EP1394401 | NS | Netherlands | 2022-Feb-14 | EP_13_10993074 | A/Mallard/Netherlands/2/2022                               | Erasmus Medical Center                 | Erasmus Medical Center                              |                                                                                                                                            |

|          |    |             |             |                |                                         |                                   |                                   |                                                                                                                                        |
|----------|----|-------------|-------------|----------------|-----------------------------------------|-----------------------------------|-----------------------------------|----------------------------------------------------------------------------------------------------------------------------------------|
| EP129492 | MP | Netherlands | 2022-Feb-14 | EP_IS_1099374  | A/Mallard/Netherlands/2/2022            | Erasmus Medical Center            | Erasmus Medical Center            |                                                                                                                                        |
| EP129508 | NP | Netherlands | 2022-Jan-29 | EP_IS_1099106  | A/Sanderling/Netherlands/2/2022         | Erasmus Medical Center            | Erasmus Medical Center            |                                                                                                                                        |
| EP129509 | NS | Netherlands | 2022-Jan-29 | EP_IS_1099106  | A/Sanderling/Netherlands/2/2022         | Erasmus Medical Center            | Erasmus Medical Center            |                                                                                                                                        |
| EP129540 | MP | Netherlands | 2022-Jan-29 | EP_IS_1099106  | A/Sanderling/Netherlands/2/2022         | Erasmus Medical Center            | Erasmus Medical Center            |                                                                                                                                        |
| EP129526 | NP | Netherlands | 2022-Jan-03 | EP_IS_11019784 | A/Red fox/Netherlands/2/2002097-05/2022 | Wageningen Bioveterinary Research | Wageningen Bioveterinary Research | Beersma, Nancy; Harder, Frank; Pritz-Verschuuren, Sylvia; Rooze, Merit; Vanma, Sandra; Germeaad, Evelien; Englema, Marc; Neukirk, Rene |
| EP129527 | NS | Netherlands | 2022-Jan-03 | EP_IS_11019784 | A/Red fox/Netherlands/2/2002097-05/2022 | Wageningen Bioveterinary Research | Wageningen Bioveterinary Research | Beersma, Nancy; Harder, Frank; Pritz-Verschuuren, Sylvia; Rooze, Merit; Vanma, Sandra; Germeaad, Evelien; Englema, Marc; Neukirk, Rene |
| EP129528 | MP | Netherlands | 2022-Jan-03 | EP_IS_11019784 | A/Red fox/Netherlands/2/2002097-05/2022 | Wageningen Bioveterinary Research | Wageningen Bioveterinary Research | Beersma, Nancy; Harder, Frank; Pritz-Verschuuren, Sylvia; Rooze, Merit; Vanma, Sandra; Germeaad, Evelien; Englema, Marc; Neukirk, Rene |
| EP129525 | NP | Netherlands | 2022-Feb-07 | EP_IS_11019882 | A/Red fox/Netherlands/2/2002036-02/2022 | Wageningen Bioveterinary Research | Wageningen Bioveterinary Research | Beersma, Nancy; Harder, Frank; Pritz-Verschuuren, Sylvia; Rooze, Merit; Vanma, Sandra; Germeaad, Evelien; Englema, Marc; Neukirk, Rene |
| EP129526 | NS | Netherlands | 2022-Feb-07 | EP_IS_11019882 | A/Red fox/Netherlands/2/2002036-02/2022 | Wageningen Bioveterinary Research | Wageningen Bioveterinary Research | Beersma, Nancy; Harder, Frank; Pritz-Verschuuren, Sylvia; Rooze, Merit; Vanma, Sandra; Germeaad, Evelien; Englema, Marc; Neukirk, Rene |
| EP129527 | MP | Netherlands | 2022-Feb-07 | EP_IS_11019882 | A/Red fox/Netherlands/2/2002036-02/2022 | Wageningen Bioveterinary Research | Wageningen Bioveterinary Research | Beersma, Nancy; Harder, Frank; Pritz-Verschuuren, Sylvia; Rooze, Merit; Vanma, Sandra; Germeaad, Evelien; Englema, Marc; Neukirk, Rene |
| EP129535 | NP | Netherlands | 2022-Feb-07 | EP_IS_11112340 | A/Barnack Goose/Netherlands/10/2022     | Erasmus Medical Center            | Erasmus Medical Center            |                                                                                                                                        |
| EP129537 | NS | Netherlands | 2022-Feb-07 | EP_IS_11112340 | A/Barnack Goose/Netherlands/10/2022     | Erasmus Medical Center            | Erasmus Medical Center            |                                                                                                                                        |
| EP129539 | MP | Netherlands | 2022-Feb-07 | EP_IS_11112340 | A/Barnack Goose/Netherlands/10/2022     | Erasmus Medical Center            | Erasmus Medical Center            |                                                                                                                                        |
| EP129571 | NP | Netherlands | 2022-Feb-09 | EP_IS_11112342 | A/Barnack Goose/Netherlands/11/2022     | Erasmus Medical Center            | Erasmus Medical Center            |                                                                                                                                        |
| EP129573 | NS | Netherlands | 2022-Feb-09 | EP_IS_11112342 | A/Barnack Goose/Netherlands/11/2022     | Erasmus Medical Center            | Erasmus Medical Center            |                                                                                                                                        |
| EP129575 | MP | Netherlands | 2022-Feb-09 | EP_IS_11112342 | A/Barnack Goose/Netherlands/11/2022     | Erasmus Medical Center            | Erasmus Medical Center            |                                                                                                                                        |
| EP129588 | NP | Netherlands | 2022-Feb-09 | EP_IS_11112344 | A/Barnack Goose/Netherlands/12/2022     | Erasmus Medical Center            | Erasmus Medical Center            |                                                                                                                                        |
| EP129590 | NS | Netherlands | 2022-Feb-09 | EP_IS_11112344 | A/Barnack Goose/Netherlands/12/2022     | Erasmus Medical Center            | Erasmus Medical Center            |                                                                                                                                        |
| EP129591 | MP | Netherlands | 2022-Feb-09 | EP_IS_11112344 | A/Barnack Goose/Netherlands/12/2022     | Erasmus Medical Center            | Erasmus Medical Center            |                                                                                                                                        |
| EP129564 | NP | Netherlands | 2022-Feb-23 | EP_IS_11112346 | A/Barnack Goose/Netherlands/13/2022     | Erasmus Medical Center            | Erasmus Medical Center            |                                                                                                                                        |
| EP129566 | NS | Netherlands | 2022-Feb-23 | EP_IS_11112346 | A/Barnack Goose/Netherlands/13/2022     | Erasmus Medical Center            | Erasmus Medical Center            |                                                                                                                                        |
| EP129567 | MP | Netherlands | 2022-Feb-23 | EP_IS_11112346 | A/Barnack Goose/Netherlands/13/2022     | Erasmus Medical Center            | Erasmus Medical Center            |                                                                                                                                        |
| EP129563 | NP | Netherlands | 2022-Feb-23 | EP_IS_11112348 | A/Barnack Goose/Netherlands/14/2022     | Erasmus Medical Center            | Erasmus Medical Center            |                                                                                                                                        |
| EP129562 | NS | Netherlands | 2022-Feb-23 | EP_IS_11112348 | A/Barnack Goose/Netherlands/14/2022     | Erasmus Medical Center            | Erasmus Medical Center            |                                                                                                                                        |
| EP129563 | MP | Netherlands | 2022-Feb-23 | EP_IS_11112348 | A/Barnack Goose/Netherlands/14/2022     | Erasmus Medical Center            | Erasmus Medical Center            |                                                                                                                                        |
| EP129561 | NP | Netherlands | 2022-Feb-26 | EP_IS_11112350 | A/Barnack Goose/Netherlands/15/2022     | Erasmus Medical Center            | Erasmus Medical Center            |                                                                                                                                        |
| EP129563 | NS | Netherlands | 2022-Feb-26 | EP_IS_11112350 | A/Barnack Goose/Netherlands/15/2022     | Erasmus Medical Center            | Erasmus Medical Center            |                                                                                                                                        |
| EP129565 | MP | Netherlands | 2022-Feb-26 | EP_IS_11112350 | A/Barnack Goose/Netherlands/15/2022     | Erasmus Medical Center            | Erasmus Medical Center            |                                                                                                                                        |
| EP129547 | NP | Netherlands | 2022-Feb-07 | EP_IS_11112352 | A/Barnack Goose/Netherlands/9/2022      | Erasmus Medical Center            | Erasmus Medical Center            |                                                                                                                                        |
| EP129549 | NS | Netherlands | 2022-Feb-07 | EP_IS_11112352 | A/Barnack Goose/Netherlands/9/2022      | Erasmus Medical Center            | Erasmus Medical Center            |                                                                                                                                        |
| EP129551 | MP | Netherlands | 2022-Feb-07 | EP_IS_11112352 | A/Barnack Goose/Netherlands/9/2022      | Erasmus Medical Center            | Erasmus Medical Center            |                                                                                                                                        |
| EP129563 | NP | Netherlands | 2022-Feb-01 | EP_IS_11112354 | A/Common Gull/Netherlands/1/2022        | Erasmus Medical Center            | Erasmus Medical Center            |                                                                                                                                        |
| EP129565 | NS | Netherlands | 2022-Feb-01 | EP_IS_11112354 | A/Common Gull/Netherlands/1/2022        | Erasmus Medical Center            | Erasmus Medical Center            |                                                                                                                                        |
| EP129567 | MP | Netherlands | 2022-Feb-01 | EP_IS_11112354 | A/Common Gull/Netherlands/1/2022        | Erasmus Medical Center            | Erasmus Medical Center            |                                                                                                                                        |
| EP129579 | NP | Netherlands | 2022-Feb-09 | EP_IS_11112356 | A/Turkian Curlew/Netherlands/12/2022    | Erasmus Medical Center            | Erasmus Medical Center            |                                                                                                                                        |

|          |    |                |             |                |                                              |                                        |                                                     |                                                                                                                                                          |
|----------|----|----------------|-------------|----------------|----------------------------------------------|----------------------------------------|-----------------------------------------------------|----------------------------------------------------------------------------------------------------------------------------------------------------------|
| EP199561 | NS | Netherlands    | 2022-Feb-09 | EP_19_11112756 | A/Eurasian Curlew/Netherlands/1/2022         | Erasmus Medical Center                 | Erasmus Medical Center                              |                                                                                                                                                          |
| EP199563 | MP | Netherlands    | 2022-Feb-09 | EP_19_11112756 | A/Eurasian Curlew/Netherlands/1/2022         | Erasmus Medical Center                 | Erasmus Medical Center                              |                                                                                                                                                          |
| EP199565 | NP | Netherlands    | 2022-Feb-26 | EP_19_11112758 | A/Eurasian Herring Gull/Netherlands/2/2022   | Erasmus Medical Center                 | Erasmus Medical Center                              |                                                                                                                                                          |
| EP199567 | NS | Netherlands    | 2022-Feb-26 | EP_19_11112758 | A/Eurasian Herring Gull/Netherlands/2/2022   | Erasmus Medical Center                 | Erasmus Medical Center                              |                                                                                                                                                          |
| EP199569 | MP | Netherlands    | 2022-Feb-26 | EP_19_11112758 | A/Eurasian Herring Gull/Netherlands/2/2022   | Erasmus Medical Center                 | Erasmus Medical Center                              |                                                                                                                                                          |
| EP199571 | NP | Netherlands    | 2022-Feb-23 | EP_19_11112760 | A/Great black-backed Gull/Netherlands/2/2022 | Erasmus Medical Center                 | Erasmus Medical Center                              |                                                                                                                                                          |
| EP199573 | NS | Netherlands    | 2022-Feb-23 | EP_19_11112760 | A/Great black-backed Gull/Netherlands/2/2022 | Erasmus Medical Center                 | Erasmus Medical Center                              |                                                                                                                                                          |
| EP199575 | MP | Netherlands    | 2022-Feb-23 | EP_19_11112760 | A/Great black-backed Gull/Netherlands/2/2022 | Erasmus Medical Center                 | Erasmus Medical Center                              |                                                                                                                                                          |
| EP199577 | NP | Netherlands    | 2022-Feb-02 | EP_19_11112762 | A/Grey-winged Gull/Netherlands/1/2022        | Erasmus Medical Center                 | Erasmus Medical Center                              |                                                                                                                                                          |
| EP199579 | NS | Netherlands    | 2022-Feb-02 | EP_19_11112762 | A/Grey-winged Gull/Netherlands/1/2022        | Erasmus Medical Center                 | Erasmus Medical Center                              |                                                                                                                                                          |
| EP199571 | MP | Netherlands    | 2022-Feb-02 | EP_19_11112762 | A/Grey-winged Gull/Netherlands/1/2022        | Erasmus Medical Center                 | Erasmus Medical Center                              |                                                                                                                                                          |
| EP199580 | NP | Netherlands    | 2022-Feb-23 | EP_19_11112484 | A/Caspian Gull/Netherlands/2/2022            | Erasmus Medical Center                 | Erasmus Medical Center                              |                                                                                                                                                          |
| EP199581 | NS | Netherlands    | 2022-Feb-23 | EP_19_11112484 | A/Caspian Gull/Netherlands/2/2022            | Erasmus Medical Center                 | Erasmus Medical Center                              |                                                                                                                                                          |
| EP199582 | MP | Netherlands    | 2022-Feb-23 | EP_19_11112484 | A/Caspian Gull/Netherlands/2/2022            | Erasmus Medical Center                 | Erasmus Medical Center                              |                                                                                                                                                          |
| EP199811 | NP | Ireland        | 2022-Feb-14 | EP_19_11259283 | A/fin/Ireland/7866_22V192064-1/2022          | Central Veterinary Research Laboratory | Istituto Zooprofilattico Sperimentale delle Venezie | Byrne, C.; Gattik, K.; Cuartero, L.G.; Barbato, G.; Zecchin, B.; Fusaro, A.; Schivo, A.; Salvato, A.; Palumbo, F.; Giovanni, E.; Monne, I.; Terragni, C. |
| EP199812 | NS | Ireland        | 2022-Feb-14 | EP_19_11259283 | A/fin/Ireland/7866_22V192064-1/2022          | Central Veterinary Research Laboratory | Istituto Zooprofilattico Sperimentale delle Venezie | Byrne, C.; Gattik, K.; Cuartero, L.G.; Barbato, G.; Zecchin, B.; Fusaro, A.; Schivo, A.; Salvato, A.; Palumbo, F.; Giovanni, E.; Monne, I.; Terragni, C. |
| EP199813 | MP | Ireland        | 2022-Feb-14 | EP_19_11259283 | A/fin/Ireland/7866_22V192064-1/2022          | Central Veterinary Research Laboratory | Istituto Zooprofilattico Sperimentale delle Venezie | Byrne, C.; Gattik, K.; Cuartero, L.G.; Barbato, G.; Zecchin, B.; Fusaro, A.; Schivo, A.; Salvato, A.; Palumbo, F.; Giovanni, E.; Monne, I.; Terragni, C. |
| EP199819 | NP | Ireland        | 2022-Feb-14 | EP_19_11259284 | A/gosw/Ireland/7865_22V192064-2/2022         | Central Veterinary Research Laboratory | Istituto Zooprofilattico Sperimentale delle Venezie | Byrne, C.; Gattik, K.; Cuartero, L.G.; Barbato, G.; Zecchin, B.; Fusaro, A.; Schivo, A.; Salvato, A.; Palumbo, F.; Giovanni, E.; Monne, I.; Terragni, C. |
| EP199840 | NS | Ireland        | 2022-Feb-14 | EP_19_11259284 | A/gosw/Ireland/7865_22V192064-2/2022         | Central Veterinary Research Laboratory | Istituto Zooprofilattico Sperimentale delle Venezie | Byrne, C.; Gattik, K.; Cuartero, L.G.; Barbato, G.; Zecchin, B.; Fusaro, A.; Schivo, A.; Salvato, A.; Palumbo, F.; Giovanni, E.; Monne, I.; Terragni, C. |
| EP199841 | MP | Ireland        | 2022-Feb-14 | EP_19_11259284 | A/gosw/Ireland/7865_22V192064-2/2022         | Central Veterinary Research Laboratory | Istituto Zooprofilattico Sperimentale delle Venezie | Byrne, C.; Gattik, K.; Cuartero, L.G.; Barbato, G.; Zecchin, B.; Fusaro, A.; Schivo, A.; Salvato, A.; Palumbo, F.; Giovanni, E.; Monne, I.; Terragni, C. |
| EP200189 | NP | United Kingdom | 2022-Jan-06 | EP_19_11406398 | A/chicken/England/002070/2022                | Animal and Plant Health Agency (APHA)  | Animal and Plant Health Agency (APHA)               |                                                                                                                                                          |
| EP200190 | NS | United Kingdom | 2022-Jan-06 | EP_19_11406398 | A/chicken/England/002070/2022                | Animal and Plant Health Agency (APHA)  | Animal and Plant Health Agency (APHA)               |                                                                                                                                                          |
| EP200191 | MP | United Kingdom | 2022-Jan-06 | EP_19_11406398 | A/chicken/England/002070/2022                | Animal and Plant Health Agency (APHA)  | Animal and Plant Health Agency (APHA)               |                                                                                                                                                          |
| EP200197 | NP | United Kingdom | 2022-Jan-12 | EP_19_11406399 | A/turkey/England/004737/2022                 | Animal and Plant Health Agency (APHA)  | Animal and Plant Health Agency (APHA)               |                                                                                                                                                          |
| EP200198 | NS | United Kingdom | 2022-Jan-12 | EP_19_11406399 | A/turkey/England/004737/2022                 | Animal and Plant Health Agency (APHA)  | Animal and Plant Health Agency (APHA)               |                                                                                                                                                          |
| EP200199 | MP | United Kingdom | 2022-Jan-12 | EP_19_11406399 | A/turkey/England/004737/2022                 | Animal and Plant Health Agency (APHA)  | Animal and Plant Health Agency (APHA)               |                                                                                                                                                          |
| EP200613 | NP | United Kingdom | 2022-Jan-03 | EP_19_11406401 | A/chicken/England/000187/2022                | Animal and Plant Health Agency (APHA)  | Animal and Plant Health Agency (APHA)               |                                                                                                                                                          |
| EP200614 | NS | United Kingdom | 2022-Jan-03 | EP_19_11406401 | A/chicken/England/000187/2022                | Animal and Plant Health Agency (APHA)  | Animal and Plant Health Agency (APHA)               |                                                                                                                                                          |
| EP200615 | MP | United Kingdom | 2022-Jan-03 | EP_19_11406401 | A/chicken/England/000187/2022                | Animal and Plant Health Agency (APHA)  | Animal and Plant Health Agency (APHA)               |                                                                                                                                                          |
| EP200621 | NP | United Kingdom | 2022-Jan-23 | EP_19_11406402 | A/domestic_duck/England/007588/2022          | Animal and Plant Health Agency (APHA)  | Animal and Plant Health Agency (APHA)               |                                                                                                                                                          |
| EP200622 | NS | United Kingdom | 2022-Jan-23 | EP_19_11406402 | A/domestic_duck/England/007588/2022          | Animal and Plant Health Agency (APHA)  | Animal and Plant Health Agency (APHA)               |                                                                                                                                                          |
| EP200623 | MP | United Kingdom | 2022-Jan-23 | EP_19_11406402 | A/domestic_duck/England/007588/2022          | Animal and Plant Health Agency (APHA)  | Animal and Plant Health Agency (APHA)               |                                                                                                                                                          |
| EP200629 | NP | United Kingdom | 2022-Jan-31 | EP_19_11406403 | A/black-headed_gull/England/000270/2022      | Animal and Plant Health Agency (APHA)  | Animal and Plant Health Agency (APHA)               |                                                                                                                                                          |
| EP200630 | NS | United Kingdom | 2022-Jan-31 | EP_19_11406403 | A/black-headed_gull/England/000270/2022      | Animal and Plant Health Agency (APHA)  | Animal and Plant Health Agency (APHA)               |                                                                                                                                                          |
| EP200631 | MP | United Kingdom | 2022-Jan-31 | EP_19_11406403 | A/black-headed_gull/England/000270/2022      | Animal and Plant Health Agency (APHA)  | Animal and Plant Health Agency (APHA)               |                                                                                                                                                          |

|            |    |                |             |                |                                               |                                        |                                                     |                                                                                             |
|------------|----|----------------|-------------|----------------|-----------------------------------------------|----------------------------------------|-----------------------------------------------------|---------------------------------------------------------------------------------------------|
| EP1002653  | NS | Belgium        | 2022-Mar-10 | EP_10_11449674 | A/Gallus_gallus/Belgium/3194_0001/2022        | Sciensano - Animal Infectious Diseases | Sciensano, Department of Animal Infectious Diseases | Van Borm, Steven; Rousier, Virginie; Lambrecht, Benedicte; Mathijs, Elisabeth; Smeets, Mike |
| EP1002650  | NP | Belgium        | 2022-Mar-10 | EP_10_11449674 | A/Gallus_gallus/Belgium/3194_0001/2022        | Sciensano - Animal Infectious Diseases | Sciensano, Department of Animal Infectious Diseases | Van Borm, Steven; Rousier, Virginie; Lambrecht, Benedicte; Mathijs, Elisabeth; Smeets, Mike |
| EP1002652  | MP | Belgium        | 2022-Mar-10 | EP_10_11449674 | A/Gallus_gallus/Belgium/3194_0001/2022        | Sciensano - Animal Infectious Diseases | Sciensano, Department of Animal Infectious Diseases | Van Borm, Steven; Rousier, Virginie; Lambrecht, Benedicte; Mathijs, Elisabeth; Smeets, Mike |
| EP1002646  | NP | Netherlands    | 2022-Mar-03 | EP_10_11560233 | A/Brent_goose/Netherlands/1/2022              | Erasmus Medical Center                 | Erasmus Medical Center                              |                                                                                             |
| EP1002647  | NS | Netherlands    | 2022-Mar-03 | EP_10_11560233 | A/Brent_goose/Netherlands/1/2022              | Erasmus Medical Center                 | Erasmus Medical Center                              |                                                                                             |
| EP1002648  | MP | Netherlands    | 2022-Mar-03 | EP_10_11560233 | A/Brent_goose/Netherlands/1/2022              | Erasmus Medical Center                 | Erasmus Medical Center                              |                                                                                             |
| EP1002674  | NP | Netherlands    | 2022-Mar-03 | EP_10_11560235 | A/Barnack_Goose/Netherlands/16/2022           | Erasmus Medical Center                 | Erasmus Medical Center                              |                                                                                             |
| EP1002675  | NS | Netherlands    | 2022-Mar-03 | EP_10_11560235 | A/Barnack_Goose/Netherlands/16/2022           | Erasmus Medical Center                 | Erasmus Medical Center                              |                                                                                             |
| EP1002676  | MP | Netherlands    | 2022-Mar-03 | EP_10_11560235 | A/Barnack_Goose/Netherlands/16/2022           | Erasmus Medical Center                 | Erasmus Medical Center                              |                                                                                             |
| EP1002682  | NP | Netherlands    | 2022-Mar-03 | EP_10_11560236 | A/Barnack_Goose/Netherlands/17/2022           | Erasmus Medical Center                 | Erasmus Medical Center                              |                                                                                             |
| EP1002683  | NS | Netherlands    | 2022-Mar-03 | EP_10_11560236 | A/Barnack_Goose/Netherlands/17/2022           | Erasmus Medical Center                 | Erasmus Medical Center                              |                                                                                             |
| EP1002684  | MP | Netherlands    | 2022-Mar-03 | EP_10_11560236 | A/Barnack_Goose/Netherlands/17/2022           | Erasmus Medical Center                 | Erasmus Medical Center                              |                                                                                             |
| EP1002670  | NP | Netherlands    | 2022-Mar-04 | EP_10_11560233 | A/Barnack_Goose/Netherlands/16/2022           | Erasmus Medical Center                 | Erasmus Medical Center                              |                                                                                             |
| EP1002671  | NS | Netherlands    | 2022-Mar-04 | EP_10_11560233 | A/Barnack_Goose/Netherlands/16/2022           | Erasmus Medical Center                 | Erasmus Medical Center                              |                                                                                             |
| EP1002672  | MP | Netherlands    | 2022-Mar-04 | EP_10_11560233 | A/Barnack_Goose/Netherlands/16/2022           | Erasmus Medical Center                 | Erasmus Medical Center                              |                                                                                             |
| EP1002678  | NP | Netherlands    | 2022-Mar-06 | EP_10_11560324 | A/Graylag_goose/Netherlands/2/2022            | Erasmus Medical Center                 | Erasmus Medical Center                              |                                                                                             |
| EP1002679  | NS | Netherlands    | 2022-Mar-06 | EP_10_11560324 | A/Graylag_goose/Netherlands/2/2022            | Erasmus Medical Center                 | Erasmus Medical Center                              |                                                                                             |
| EP1002680  | MP | Netherlands    | 2022-Mar-06 | EP_10_11560324 | A/Graylag_goose/Netherlands/2/2022            | Erasmus Medical Center                 | Erasmus Medical Center                              |                                                                                             |
| EP1002686  | NP | Netherlands    | 2022-Mar-15 | EP_10_11560325 | A/Greent_black-backed_Gull/Netherlands/3/2022 | Erasmus Medical Center                 | Erasmus Medical Center                              |                                                                                             |
| EP1002687  | NS | Netherlands    | 2022-Mar-15 | EP_10_11560325 | A/Greent_black-backed_Gull/Netherlands/3/2022 | Erasmus Medical Center                 | Erasmus Medical Center                              |                                                                                             |
| EP1002688  | MP | Netherlands    | 2022-Mar-15 | EP_10_11560325 | A/Greent_black-backed_Gull/Netherlands/3/2022 | Erasmus Medical Center                 | Erasmus Medical Center                              |                                                                                             |
| EP1002694  | NP | United Kingdom | 2022-Feb-02 | EP_10_11561589 | A/Chickens/England/011981/2022                | Animal and Plant Health Agency (APHA)  | Animal and Plant Health Agency (APHA)               |                                                                                             |
| EP1002695  | NS | United Kingdom | 2022-Feb-02 | EP_10_11561589 | A/Chickens/England/011981/2022                | Animal and Plant Health Agency (APHA)  | Animal and Plant Health Agency (APHA)               |                                                                                             |
| EP1002696  | MP | United Kingdom | 2022-Feb-02 | EP_10_11561589 | A/Chickens/England/011981/2022                | Animal and Plant Health Agency (APHA)  | Animal and Plant Health Agency (APHA)               |                                                                                             |
| EP1002610  | NP | United Kingdom | 2022-Feb-08 | EP_10_11561590 | A/Chickens/England/012967/2022                | Animal and Plant Health Agency (APHA)  | Animal and Plant Health Agency (APHA)               |                                                                                             |
| EP10026103 | NS | United Kingdom | 2022-Feb-08 | EP_10_11561590 | A/Chickens/England/012967/2022                | Animal and Plant Health Agency (APHA)  | Animal and Plant Health Agency (APHA)               |                                                                                             |
| EP10026104 | MP | United Kingdom | 2022-Feb-08 | EP_10_11561590 | A/Chickens/England/012967/2022                | Animal and Plant Health Agency (APHA)  | Animal and Plant Health Agency (APHA)               |                                                                                             |
| EP1002610  | NP | United Kingdom | 2022-Feb-08 | EP_10_11561591 | A/Domestic_duck/England/012973/2022           | Animal and Plant Health Agency (APHA)  | Animal and Plant Health Agency (APHA)               |                                                                                             |
| EP1002611  | NS | United Kingdom | 2022-Feb-08 | EP_10_11561591 | A/Domestic_duck/England/012973/2022           | Animal and Plant Health Agency (APHA)  | Animal and Plant Health Agency (APHA)               |                                                                                             |
| EP10026112 | MP | United Kingdom | 2022-Feb-08 | EP_10_11561591 | A/Domestic_duck/England/012973/2022           | Animal and Plant Health Agency (APHA)  | Animal and Plant Health Agency (APHA)               |                                                                                             |
| EP1002618  | NP | United Kingdom | 2022-Feb-20 | EP_10_11561592 | A/Turkey/England/016515/2022                  | Animal and Plant Health Agency (APHA)  | Animal and Plant Health Agency (APHA)               |                                                                                             |
| EP1002619  | NS | United Kingdom | 2022-Feb-20 | EP_10_11561592 | A/Turkey/England/016515/2022                  | Animal and Plant Health Agency (APHA)  | Animal and Plant Health Agency (APHA)               |                                                                                             |
| EP1002619  | MP | United Kingdom | 2022-Feb-20 | EP_10_11561592 | A/Turkey/England/016515/2022                  | Animal and Plant Health Agency (APHA)  | Animal and Plant Health Agency (APHA)               |                                                                                             |
| EP1002616  | NP | United Kingdom | 2022-Feb-03 | EP_10_11561593 | A/Black-headed_gull/England/088256/2022       | Animal and Plant Health Agency (APHA)  | Animal and Plant Health Agency (APHA)               |                                                                                             |
| EP1002617  | NS | United Kingdom | 2022-Feb-03 | EP_10_11561593 | A/Black-headed_gull/England/088256/2022       | Animal and Plant Health Agency (APHA)  | Animal and Plant Health Agency (APHA)               |                                                                                             |



|           |    |             |             |                |                                                   |                                        |                                                     |                                                                                                                                         |
|-----------|----|-------------|-------------|----------------|---------------------------------------------------|----------------------------------------|-----------------------------------------------------|-----------------------------------------------------------------------------------------------------------------------------------------|
| EP020877  | NS | Netherlands | 2022-Jan-22 | EP_18_1206289  | A/Hu/Netherlands/EMC/1/2022                       | Erasmus Medical Center                 | Erasmus Medical Center                              | R.A.M., Foucher, S., Thevaran, O., Young, I., Chesakova, R., Sikama, P., Lemond, M., Prok                                               |
| EP020878  | MP | Netherlands | 2022-Jan-22 | EP_18_1206289  | A/Hu/Netherlands/EMC/1/2022                       | Erasmus Medical Center                 | Erasmus Medical Center                              | R.A.M., Foucher, S., Thevaran, O., Young, I., Chesakova, R., Sikama, P., Lemond, M., Prok                                               |
| EP020892  | NP | Netherlands | 2022-Mar-28 | EP_18_1206978  | A/graylag goose/Netherlands/22005190-002/2022     | Wageningen Bioveterinary Research      | Wageningen Bioveterinary Research                   | Beersma, Nancy; Harders, Frank; Pritz-Verschuuren, Sylvia; Rooze, Marti; Vanma, Sandra; Germeaad, Evelien; Englema, Marc; Heutink, Rene |
| EP020893  | NS | Netherlands | 2022-Mar-28 | EP_18_1206978  | A/graylag goose/Netherlands/22005190-002/2022     | Wageningen Bioveterinary Research      | Wageningen Bioveterinary Research                   | Beersma, Nancy; Harders, Frank; Pritz-Verschuuren, Sylvia; Rooze, Marti; Vanma, Sandra; Germeaad, Evelien; Englema, Marc; Heutink, Rene |
| EP020894  | MP | Netherlands | 2022-Mar-28 | EP_18_1206978  | A/graylag goose/Netherlands/22005190-002/2022     | Wageningen Bioveterinary Research      | Wageningen Bioveterinary Research                   | Beersma, Nancy; Harders, Frank; Pritz-Verschuuren, Sylvia; Rooze, Marti; Vanma, Sandra; Germeaad, Evelien; Englema, Marc; Heutink, Rene |
| EP020810  | NP | Netherlands | 2022-Mar-27 | EP_18_1206979  | A/black backed gull/Netherlands/22006193-001/2022 | Wageningen Bioveterinary Research      | Wageningen Bioveterinary Research                   | Beersma, Nancy; Harders, Frank; Pritz-Verschuuren, Sylvia; Rooze, Marti; Vanma, Sandra; Germeaad, Evelien; Englema, Marc; Heutink, Rene |
| EP020811  | NS | Netherlands | 2022-Mar-27 | EP_18_1206979  | A/black backed gull/Netherlands/22006193-001/2022 | Wageningen Bioveterinary Research      | Wageningen Bioveterinary Research                   | Beersma, Nancy; Harders, Frank; Pritz-Verschuuren, Sylvia; Rooze, Marti; Vanma, Sandra; Germeaad, Evelien; Englema, Marc; Heutink, Rene |
| EP020812  | MP | Netherlands | 2022-Mar-27 | EP_18_1206979  | A/black backed gull/Netherlands/22006193-001/2022 | Wageningen Bioveterinary Research      | Wageningen Bioveterinary Research                   | Beersma, Nancy; Harders, Frank; Pritz-Verschuuren, Sylvia; Rooze, Marti; Vanma, Sandra; Germeaad, Evelien; Englema, Marc; Heutink, Rene |
| EP0202141 | NP | Netherlands | 2022-Apr-05 | EP_18_1217729  | A/black backed gull/Netherlands/22006711-001/2022 | Wageningen Bioveterinary Research      | Wageningen Bioveterinary Research                   | Beersma, Nancy; Harders, Frank; Pritz-Verschuuren, Sylvia; Rooze, Marti; Vanma, Sandra; Germeaad, Evelien; Englema, Marc; Heutink, Rene |
| EP0202142 | NS | Netherlands | 2022-Apr-05 | EP_18_1217729  | A/black backed gull/Netherlands/22006711-001/2022 | Wageningen Bioveterinary Research      | Wageningen Bioveterinary Research                   | Beersma, Nancy; Harders, Frank; Pritz-Verschuuren, Sylvia; Rooze, Marti; Vanma, Sandra; Germeaad, Evelien; Englema, Marc; Heutink, Rene |
| EP0202143 | MP | Netherlands | 2022-Apr-05 | EP_18_1217729  | A/black backed gull/Netherlands/22006711-001/2022 | Wageningen Bioveterinary Research      | Wageningen Bioveterinary Research                   | Beersma, Nancy; Harders, Frank; Pritz-Verschuuren, Sylvia; Rooze, Marti; Vanma, Sandra; Germeaad, Evelien; Englema, Marc; Heutink, Rene |
| EP0202938 | NP | Belgium     | 2022-Mar-19 | EP_18_12210385 | A/Falco_peregrinus/Belgium/405_0002/2022          | Sciensano - Animal Infectious Diseases | Sciensano, Department of Animal Infectious Diseases | Van Born, Steven; Noopie, Virginie; Lambrecht, Benedicte; Mathijs, Elisabeth; Steensels, Mike                                           |
| EP0202941 | NS | Belgium     | 2022-Mar-19 | EP_18_12210385 | A/Falco_peregrinus/Belgium/405_0002/2022          | Sciensano - Animal Infectious Diseases | Sciensano, Department of Animal Infectious Diseases | Van Born, Steven; Noopie, Virginie; Lambrecht, Benedicte; Mathijs, Elisabeth; Steensels, Mike                                           |
| EP0202940 | MP | Belgium     | 2022-Mar-19 | EP_18_12210385 | A/Falco_peregrinus/Belgium/405_0002/2022          | Sciensano - Animal Infectious Diseases | Sciensano, Department of Animal Infectious Diseases | Van Born, Steven; Noopie, Virginie; Lambrecht, Benedicte; Mathijs, Elisabeth; Steensels, Mike                                           |
| EP0202935 | NP | Netherlands | 2022-Mar-23 | EP_18_12215416 | A/graylag goose/Netherlands/22005844-002/2022     | Wageningen Bioveterinary Research      | Wageningen Bioveterinary Research                   | Beersma, Nancy; Harders, Frank; Pritz-Verschuuren, Sylvia; Rooze, Marti; Vanma, Sandra; Germeaad, Evelien; Englema, Marc; Heutink, Rene |
| EP0202936 | NS | Netherlands | 2022-Mar-23 | EP_18_12215416 | A/graylag goose/Netherlands/22005844-002/2022     | Wageningen Bioveterinary Research      | Wageningen Bioveterinary Research                   | Beersma, Nancy; Harders, Frank; Pritz-Verschuuren, Sylvia; Rooze, Marti; Vanma, Sandra; Germeaad, Evelien; Englema, Marc; Heutink, Rene |
| EP0202937 | MP | Netherlands | 2022-Mar-23 | EP_18_12215416 | A/graylag goose/Netherlands/22005844-002/2022     | Wageningen Bioveterinary Research      | Wageningen Bioveterinary Research                   | Beersma, Nancy; Harders, Frank; Pritz-Verschuuren, Sylvia; Rooze, Marti; Vanma, Sandra; Germeaad, Evelien; Englema, Marc; Heutink, Rene |
| EP0208702 | NP | Netherlands | 2022-Apr-17 | EP_18_12474793 | A/hornacle goose/Netherlands/22007405-004/2022    | Wageningen Bioveterinary Research      | Wageningen Bioveterinary Research                   | Beersma, Nancy; Harders, Frank; Pritz-Verschuuren, Sylvia; Rooze, Marti; Vanma, Sandra; Germeaad, Evelien; Englema, Marc; Heutink, Rene |
| EP0208703 | NS | Netherlands | 2022-Apr-17 | EP_18_12474793 | A/hornacle goose/Netherlands/22007405-004/2022    | Wageningen Bioveterinary Research      | Wageningen Bioveterinary Research                   | Beersma, Nancy; Harders, Frank; Pritz-Verschuuren, Sylvia; Rooze, Marti; Vanma, Sandra; Germeaad, Evelien; Englema, Marc; Heutink, Rene |
| EP0208704 | MP | Netherlands | 2022-Apr-17 | EP_18_12474793 | A/hornacle goose/Netherlands/22007405-004/2022    | Wageningen Bioveterinary Research      | Wageningen Bioveterinary Research                   | Beersma, Nancy; Harders, Frank; Pritz-Verschuuren, Sylvia; Rooze, Marti; Vanma, Sandra; Germeaad, Evelien; Englema, Marc; Heutink, Rene |
| EP020870  | NP | Netherlands | 2022-Apr-11 | EP_18_12474794 | A/graylag goose /Netherlands/22008519-001/2022    | Wageningen Bioveterinary Research      | Wageningen Bioveterinary Research                   | Beersma, Nancy; Harders, Frank; Pritz-Verschuuren, Sylvia; Rooze, Marti; Vanma, Sandra; Germeaad, Evelien; Englema, Marc; Heutink, Rene |
| EP0208771 | NS | Netherlands | 2022-Apr-11 | EP_18_12474794 | A/graylag goose /Netherlands/22008519-001/2022    | Wageningen Bioveterinary Research      | Wageningen Bioveterinary Research                   | Beersma, Nancy; Harders, Frank; Pritz-Verschuuren, Sylvia; Rooze, Marti; Vanma, Sandra; Germeaad, Evelien; Englema, Marc; Heutink, Rene |
| EP0208772 | MP | Netherlands | 2022-Apr-11 | EP_18_12474794 | A/graylag goose /Netherlands/22008519-001/2022    | Wageningen Bioveterinary Research      | Wageningen Bioveterinary Research                   | Beersma, Nancy; Harders, Frank; Pritz-Verschuuren, Sylvia; Rooze, Marti; Vanma, Sandra; Germeaad, Evelien; Englema, Marc; Heutink, Rene |
| EP0208887 | NS | Netherlands | 2022-Apr-06 | EP_18_12512879 | A/black headed gull/Netherlands/2/2022            | Erasmus Medical Center                 | Erasmus Medical Center                              |                                                                                                                                         |
| EP0208884 | MP | Netherlands | 2022-Apr-06 | EP_18_12512879 | A/black headed gull/Netherlands/2/2022            | Erasmus Medical Center                 | Erasmus Medical Center                              |                                                                                                                                         |
| EP0208886 | NP | Netherlands | 2022-Apr-06 | EP_18_12512879 | A/black headed gull/Netherlands/2/2022            | Erasmus Medical Center                 | Erasmus Medical Center                              |                                                                                                                                         |
| EP0209044 | NP | Netherlands | 2022-Apr-14 | EP_18_12514425 | A/black headed gull/Netherlands/3/2022            | Erasmus Medical Center                 | Erasmus Medical Center                              |                                                                                                                                         |
| EP0209046 | NS | Netherlands | 2022-Apr-14 | EP_18_12514425 | A/black headed gull/Netherlands/3/2022            | Erasmus Medical Center                 | Erasmus Medical Center                              |                                                                                                                                         |
| EP0209046 | MP | Netherlands | 2022-Apr-14 | EP_18_12514425 | A/black headed gull/Netherlands/3/2022            | Erasmus Medical Center                 | Erasmus Medical Center                              |                                                                                                                                         |
| EP0209052 | NP | Netherlands | 2022-Apr-14 | EP_18_12514442 | A/black headed gull/Netherlands/4/2022            | Erasmus Medical Center                 | Erasmus Medical Center                              |                                                                                                                                         |
| EP0209053 | NS | Netherlands | 2022-Apr-14 | EP_18_12514442 | A/black headed gull/Netherlands/4/2022            | Erasmus Medical Center                 | Erasmus Medical Center                              |                                                                                                                                         |
| EP0209054 | MP | Netherlands | 2022-Apr-14 | EP_18_12514442 | A/black headed gull/Netherlands/4/2022            | Erasmus Medical Center                 | Erasmus Medical Center                              |                                                                                                                                         |
| EP0209060 | NP | Netherlands | 2022-Apr-14 | EP_18_12514481 | A/Caspian Gull/Netherlands/3/2022                 | Erasmus Medical Center                 | Erasmus Medical Center                              |                                                                                                                                         |
| EP0209061 | NS | Netherlands | 2022-Apr-14 | EP_18_12514481 | A/Caspian Gull/Netherlands/3/2022                 | Erasmus Medical Center                 | Erasmus Medical Center                              |                                                                                                                                         |
| EP0209062 | MP | Netherlands | 2022-Apr-14 | EP_18_12514481 | A/Caspian Gull/Netherlands/3/2022                 | Erasmus Medical Center                 | Erasmus Medical Center                              |                                                                                                                                         |



|           |    |             |             |                |                                               |                                               |                                   |                                                                                                                                         |
|-----------|----|-------------|-------------|----------------|-----------------------------------------------|-----------------------------------------------|-----------------------------------|-----------------------------------------------------------------------------------------------------------------------------------------|
| EP020908  | NP | Netherlands | 2022-Apr-11 | EP_10_12514532 | A/Common raven/Netherlands/1/2022             | Erasmus Medical Center                        | Erasmus Medical Center            |                                                                                                                                         |
| EP020909  | NS | Netherlands | 2022-Apr-11 | EP_10_12514532 | A/Common raven/Netherlands/1/2022             | Erasmus Medical Center                        | Erasmus Medical Center            |                                                                                                                                         |
| EP020970  | MP | Netherlands | 2022-Apr-11 | EP_10_12514532 | A/Common raven/Netherlands/1/2022             | Erasmus Medical Center                        | Erasmus Medical Center            |                                                                                                                                         |
| EP020976  | NP | Netherlands | 2022-Apr-13 | EP_10_12514573 | A/Song Thrush/Netherlands/2/2022              | Erasmus Medical Center                        | Erasmus Medical Center            |                                                                                                                                         |
| EP020977  | NS | Netherlands | 2022-Apr-13 | EP_10_12514573 | A/Song Thrush/Netherlands/1/2022              | Erasmus Medical Center                        | Erasmus Medical Center            |                                                                                                                                         |
| EP020978  | MP | Netherlands | 2022-Apr-13 | EP_10_12514573 | A/Song Thrush/Netherlands/1/2022              | Erasmus Medical Center                        | Erasmus Medical Center            |                                                                                                                                         |
| EP020984  | NP | Netherlands | 2022-Apr-14 | EP_10_12514622 | A/Common raven/Netherlands/1/2022             | Erasmus Medical Center                        | Erasmus Medical Center            |                                                                                                                                         |
| EP020985  | NS | Netherlands | 2022-Apr-14 | EP_10_12514622 | A/Common raven/Netherlands/1/2022             | Erasmus Medical Center                        | Erasmus Medical Center            |                                                                                                                                         |
| EP020986  | MP | Netherlands | 2022-Apr-14 | EP_10_12514622 | A/Common raven/Netherlands/1/2022             | Erasmus Medical Center                        | Erasmus Medical Center            |                                                                                                                                         |
| EP020992  | NP | Netherlands | 2022-Apr-14 | EP_10_12514681 | A/European Herring Gull/Netherlands/2/2022    | Erasmus Medical Center                        | Erasmus Medical Center            |                                                                                                                                         |
| EP020993  | NS | Netherlands | 2022-Apr-14 | EP_10_12514681 | A/European Herring Gull/Netherlands/2/2022    | Erasmus Medical Center                        | Erasmus Medical Center            |                                                                                                                                         |
| EP020994  | MP | Netherlands | 2022-Apr-14 | EP_10_12514681 | A/European Herring Gull/Netherlands/2/2022    | Erasmus Medical Center                        | Erasmus Medical Center            |                                                                                                                                         |
| EP020816  | MP | Luxembourg  | 2022-Jan-17 | EP_10_13026245 | A/Canada goose/Luxembourg/22031198/2022       | Laboratoire de Médecine vétérinaire de l'Etat | Luxembourg Institute of Health    | Aurélie Seay, Chantal Smeek                                                                                                             |
| EP020817  | NS | Luxembourg  | 2022-Jan-17 | EP_10_13026245 | A/Canada goose/Luxembourg/22031198/2022       | Laboratoire de Médecine vétérinaire de l'Etat | Luxembourg Institute of Health    | Aurélie Seay, Chantal Smeek                                                                                                             |
| EP020820  | NP | Luxembourg  | 2022-Jan-17 | EP_10_13026245 | A/Canada goose/Luxembourg/22031198/2022       | Laboratoire de Médecine vétérinaire de l'Etat | Luxembourg Institute of Health    | Aurélie Seay, Chantal Smeek                                                                                                             |
| EP020824  | MP | Luxembourg  | 2022-Feb-04 | EP_10_13026246 | A/Barnacle goose/Luxembourg/22033922/2022     | Laboratoire de Médecine vétérinaire de l'Etat | Luxembourg Institute of Health    | Aurélie Seay, Chantal Smeek                                                                                                             |
| EP020828  | NP | Luxembourg  | 2022-Feb-04 | EP_10_13026246 | A/Barnacle goose/Luxembourg/22033922/2022     | Laboratoire de Médecine vétérinaire de l'Etat | Luxembourg Institute of Health    | Aurélie Seay, Chantal Smeek                                                                                                             |
| EP020825  | NS | Luxembourg  | 2022-Feb-04 | EP_10_13026246 | A/Barnacle goose/Luxembourg/22033922/2022     | Laboratoire de Médecine vétérinaire de l'Etat | Luxembourg Institute of Health    | Aurélie Seay, Chantal Smeek                                                                                                             |
| EP020526  | NP | Netherlands | 2022-Apr-29 | EP_10_13201090 | A/Lesser Black-backed Gull/Netherlands/1/2022 | Erasmus Medical Center                        | Erasmus Medical Center            |                                                                                                                                         |
| EP020527  | NS | Netherlands | 2022-Apr-29 | EP_10_13201090 | A/Lesser Black-backed Gull/Netherlands/1/2022 | Erasmus Medical Center                        | Erasmus Medical Center            |                                                                                                                                         |
| EP020528  | MP | Netherlands | 2022-Apr-29 | EP_10_13201090 | A/Lesser Black-backed Gull/Netherlands/1/2022 | Erasmus Medical Center                        | Erasmus Medical Center            |                                                                                                                                         |
| EP020544  | NP | Netherlands | 2022-Mar-05 | EP_10_13201074 | A/European polecat/Netherlands/1/2022         | Erasmus Medical Center                        | Erasmus Medical Center            |                                                                                                                                         |
| EP020546  | NS | Netherlands | 2022-Mar-05 | EP_10_13201074 | A/European polecat/Netherlands/1/2022         | Erasmus Medical Center                        | Erasmus Medical Center            |                                                                                                                                         |
| EP020546  | MP | Netherlands | 2022-Mar-05 | EP_10_13201074 | A/European polecat/Netherlands/1/2022         | Erasmus Medical Center                        | Erasmus Medical Center            |                                                                                                                                         |
| EP020232  | MP | Iceland     | 2022-Apr-14 | EP_10_13246267 | A/Chicken/Iceland/2022A02564/2022             | University of Iceland, Keldur                 | Friedrich-Loeffler-Institut       |                                                                                                                                         |
| EP020234  | NP | Iceland     | 2022-Apr-14 | EP_10_13246267 | A/Chicken/Iceland/2022A02564/2022             | University of Iceland, Keldur                 | Friedrich-Loeffler-Institut       |                                                                                                                                         |
| EP020235  | NS | Iceland     | 2022-Apr-14 | EP_10_13246267 | A/Chicken/Iceland/2022A02564/2022             | University of Iceland, Keldur                 | Friedrich-Loeffler-Institut       |                                                                                                                                         |
| EP020233  | NP | Iceland     | 2022-Apr-14 | EP_10_13246697 | A/Chicken/Iceland/2022A02565/2022             | University of Iceland, Keldur                 | Friedrich-Loeffler-Institut       |                                                                                                                                         |
| EP020231  | MP | Iceland     | 2022-Apr-14 | EP_10_13246697 | A/Chicken/Iceland/2022A02565/2022             | University of Iceland, Keldur                 | Friedrich-Loeffler-Institut       |                                                                                                                                         |
| EP020234  | NS | Iceland     | 2022-Apr-14 | EP_10_13246697 | A/Chicken/Iceland/2022A02565/2022             | University of Iceland, Keldur                 | Friedrich-Loeffler-Institut       |                                                                                                                                         |
| EP0208204 | NP | Netherlands | 2022-May-26 | EP_10_13300319 | A/Brannt goose/Netherlands/2209881-002/2022   | Wageningen Bioveterinary Research             | Wageningen Bioveterinary Research | Beersma, Nancy, Handers, Frank, Pitz-Verschuuren, Sylvia, Rooze, Merit, Vanma, Sandra, Germeaad, Evelien, Engelsma, Marc, Neutink, Rene |
| EP0208205 | NS | Netherlands | 2022-May-26 | EP_10_13300319 | A/Brannt goose/Netherlands/2209881-002/2022   | Wageningen Bioveterinary Research             | Wageningen Bioveterinary Research | Beersma, Nancy, Handers, Frank, Pitz-Verschuuren, Sylvia, Rooze, Merit, Vanma, Sandra, Germeaad, Evelien, Engelsma, Marc, Neutink, Rene |
| EP0208206 | MP | Netherlands | 2022-May-26 | EP_10_13300319 | A/Brannt goose/Netherlands/2209881-002/2022   | Wageningen Bioveterinary Research             | Wageningen Bioveterinary Research | Beersma, Nancy, Handers, Frank, Pitz-Verschuuren, Sylvia, Rooze, Merit, Vanma, Sandra, Germeaad, Evelien, Engelsma, Marc, Neutink, Rene |
| EP0208136 | NP | Netherlands | 2022-May-27 | EP_10_13300324 | A/White stork/Netherlands/2209879-002/2022    | Wageningen Bioveterinary Research             | Wageningen Bioveterinary Research | Beersma, Nancy, Handers, Frank, Pitz-Verschuuren, Sylvia, Rooze, Merit, Vanma, Sandra, Germeaad, Evelien, Engelsma, Marc, Neutink, Rene |
| EP020817  | NS | Netherlands | 2022-May-27 | EP_10_13300324 | A/White stork/Netherlands/2209879-002/2022    | Wageningen Bioveterinary Research             | Wageningen Bioveterinary Research | Beersma, Nancy, Handers, Frank, Pitz-Verschuuren, Sylvia, Rooze, Merit, Vanma, Sandra, Germeaad, Evelien, Engelsma, Marc, Neutink, Rene |

|           |    |                |             |                |                                                          |                                       |                                       |                                                                                                                                           |
|-----------|----|----------------|-------------|----------------|----------------------------------------------------------|---------------------------------------|---------------------------------------|-------------------------------------------------------------------------------------------------------------------------------------------|
| EP020818  | MP | Netherlands    | 2022-May-27 | EP_IS_1330024  | A/white stork/Netherlands/2209079-022/2022               | Wageningen Bioveterinary Research     | Wageningen Bioveterinary Research     | Beersma, Nancy; Harders, Frank; Pitz-Verschuuren, Sylvia; Rosse, Merit; Vennema, Sanne; Germeaad, Evelien; Engelen, Marc; Heuvelink, René |
| EP0208017 | MP | Sweden         | 2022-May-25 | EP_IS_13338081 | A/Northern gannet/Sweden/SVA.22025320402/80051874-D-2022 | National Veterinary Institute, SVA    | National Veterinary Institute         |                                                                                                                                           |
| EP0208015 | NP | Sweden         | 2022-May-25 | EP_IS_13338081 | A/Northern gannet/Sweden/SVA.22025320402/80051874-D-2022 | National Veterinary Institute, SVA    | National Veterinary Institute         |                                                                                                                                           |
| EP0208018 | NS | Sweden         | 2022-May-25 | EP_IS_13338081 | A/Northern gannet/Sweden/SVA.22025320402/80051874-D-2022 | National Veterinary Institute, SVA    | National Veterinary Institute         |                                                                                                                                           |
| EP0207369 | NP | United Kingdom | 2022-Jan-02 | EP_IS_13370581 | A/domestic_duck/England/0003537/2022                     | Animal and Plant Health Agency (APHA) | Animal and Plant Health Agency (APHA) |                                                                                                                                           |
| EP0207370 | NS | United Kingdom | 2022-Jan-02 | EP_IS_13370581 | A/domestic_duck/England/0003537/2022                     | Animal and Plant Health Agency (APHA) | Animal and Plant Health Agency (APHA) |                                                                                                                                           |
| EP0207371 | MP | United Kingdom | 2022-Jan-02 | EP_IS_13370581 | A/domestic_duck/England/0003537/2022                     | Animal and Plant Health Agency (APHA) | Animal and Plant Health Agency (APHA) |                                                                                                                                           |
| EP0207377 | NP | United Kingdom | 2022-Jan-02 | EP_IS_13370582 | A/chicken/England/000095/2022                            | Animal and Plant Health Agency (APHA) | Animal and Plant Health Agency (APHA) |                                                                                                                                           |
| EP0207378 | NS | United Kingdom | 2022-Jan-02 | EP_IS_13370582 | A/chicken/England/000095/2022                            | Animal and Plant Health Agency (APHA) | Animal and Plant Health Agency (APHA) |                                                                                                                                           |
| EP0207379 | MP | United Kingdom | 2022-Jan-02 | EP_IS_13370582 | A/chicken/England/000095/2022                            | Animal and Plant Health Agency (APHA) | Animal and Plant Health Agency (APHA) |                                                                                                                                           |
| EP0207385 | NP | United Kingdom | 2022-Jan-04 | EP_IS_13370583 | A/hurkey/England/000733/2022                             | Animal and Plant Health Agency (APHA) | Animal and Plant Health Agency (APHA) |                                                                                                                                           |
| EP0207386 | NS | United Kingdom | 2022-Jan-04 | EP_IS_13370583 | A/hurkey/England/000733/2022                             | Animal and Plant Health Agency (APHA) | Animal and Plant Health Agency (APHA) |                                                                                                                                           |
| EP0207387 | MP | United Kingdom | 2022-Jan-04 | EP_IS_13370583 | A/hurkey/England/000733/2022                             | Animal and Plant Health Agency (APHA) | Animal and Plant Health Agency (APHA) |                                                                                                                                           |
| EP0207393 | NP | United Kingdom | 2022-Jan-08 | EP_IS_13370584 | A/chicken/England/002376/2022                            | Animal and Plant Health Agency (APHA) | Animal and Plant Health Agency (APHA) |                                                                                                                                           |
| EP0207394 | NS | United Kingdom | 2022-Jan-08 | EP_IS_13370584 | A/chicken/England/002376/2022                            | Animal and Plant Health Agency (APHA) | Animal and Plant Health Agency (APHA) |                                                                                                                                           |
| EP0207395 | MP | United Kingdom | 2022-Jan-08 | EP_IS_13370584 | A/chicken/England/002376/2022                            | Animal and Plant Health Agency (APHA) | Animal and Plant Health Agency (APHA) |                                                                                                                                           |
| EP0207001 | NP | United Kingdom | 2022-Jan-08 | EP_IS_13370579 | A/common_gull/England/245481/2022                        | Animal and Plant Health Agency (APHA) | Animal and Plant Health Agency (APHA) |                                                                                                                                           |
| EP0207002 | NS | United Kingdom | 2022-Jan-08 | EP_IS_13370579 | A/common_gull/England/245481/2022                        | Animal and Plant Health Agency (APHA) | Animal and Plant Health Agency (APHA) |                                                                                                                                           |
| EP0207003 | MP | United Kingdom | 2022-Jan-08 | EP_IS_13370579 | A/common_gull/England/245481/2022                        | Animal and Plant Health Agency (APHA) | Animal and Plant Health Agency (APHA) |                                                                                                                                           |
| EP0207009 | NP | United Kingdom | 2022-Jan-12 | EP_IS_13370592 | A/hurkey/England/044667/2022                             | Animal and Plant Health Agency (APHA) | Animal and Plant Health Agency (APHA) |                                                                                                                                           |
| EP0207010 | NS | United Kingdom | 2022-Jan-12 | EP_IS_13370592 | A/hurkey/England/044667/2022                             | Animal and Plant Health Agency (APHA) | Animal and Plant Health Agency (APHA) |                                                                                                                                           |
| EP0207011 | MP | United Kingdom | 2022-Jan-12 | EP_IS_13370592 | A/hurkey/England/044667/2022                             | Animal and Plant Health Agency (APHA) | Animal and Plant Health Agency (APHA) |                                                                                                                                           |
| EP0207017 | NP | Isle of Man    | 2022-Jan-14 | EP_IS_13370593 | A/irreying_goose/Isle_of_Man/0102398/2022                | Animal and Plant Health Agency (APHA) | Animal and Plant Health Agency (APHA) |                                                                                                                                           |
| EP0207018 | NS | Isle of Man    | 2022-Jan-14 | EP_IS_13370593 | A/irreying_goose/Isle_of_Man/0102398/2022                | Animal and Plant Health Agency (APHA) | Animal and Plant Health Agency (APHA) |                                                                                                                                           |
| EP0207019 | MP | Isle of Man    | 2022-Jan-14 | EP_IS_13370593 | A/irreying_goose/Isle_of_Man/0102398/2022                | Animal and Plant Health Agency (APHA) | Animal and Plant Health Agency (APHA) |                                                                                                                                           |
| EP0207025 | NP | United Kingdom | 2022-Jan-19 | EP_IS_13370594 | A/domestic_goose/England/000847/2022                     | Animal and Plant Health Agency (APHA) | Animal and Plant Health Agency (APHA) |                                                                                                                                           |
| EP0207026 | NS | United Kingdom | 2022-Jan-19 | EP_IS_13370594 | A/domestic_goose/England/000847/2022                     | Animal and Plant Health Agency (APHA) | Animal and Plant Health Agency (APHA) |                                                                                                                                           |
| EP0207027 | MP | United Kingdom | 2022-Jan-19 | EP_IS_13370594 | A/domestic_goose/England/000847/2022                     | Animal and Plant Health Agency (APHA) | Animal and Plant Health Agency (APHA) |                                                                                                                                           |
| EP0207033 | NP | United Kingdom | 2022-Jan-20 | EP_IS_13370595 | A/hurkey/England/000663/2022                             | Animal and Plant Health Agency (APHA) | Animal and Plant Health Agency (APHA) |                                                                                                                                           |
| EP0207034 | NS | United Kingdom | 2022-Jan-20 | EP_IS_13370595 | A/hurkey/England/000663/2022                             | Animal and Plant Health Agency (APHA) | Animal and Plant Health Agency (APHA) |                                                                                                                                           |
| EP0207035 | MP | United Kingdom | 2022-Jan-20 | EP_IS_13370595 | A/hurkey/England/000663/2022                             | Animal and Plant Health Agency (APHA) | Animal and Plant Health Agency (APHA) |                                                                                                                                           |
| EP0207041 | NP | United Kingdom | 2022-Jan-23 | EP_IS_13370596 | A/hurkey/England/007560/2022                             | Animal and Plant Health Agency (APHA) | Animal and Plant Health Agency (APHA) |                                                                                                                                           |
| EP0207042 | NS | United Kingdom | 2022-Jan-23 | EP_IS_13370596 | A/hurkey/England/007560/2022                             | Animal and Plant Health Agency (APHA) | Animal and Plant Health Agency (APHA) |                                                                                                                                           |
| EP0207043 | MP | United Kingdom | 2022-Jan-23 | EP_IS_13370596 | A/hurkey/England/007560/2022                             | Animal and Plant Health Agency (APHA) | Animal and Plant Health Agency (APHA) |                                                                                                                                           |
| EP0207049 | NP | United Kingdom | 2022-Jan-23 | EP_IS_13370597 | A/chicken/England/000758/2022                            | Animal and Plant Health Agency (APHA) | Animal and Plant Health Agency (APHA) |                                                                                                                                           |







|           |    |                |             |                |                                        |                                       |                                       |
|-----------|----|----------------|-------------|----------------|----------------------------------------|---------------------------------------|---------------------------------------|
| EP0207818 | NS | Netherlands    | 2022-Jun-03 | EP_10_13429200 | A/Caspien Gulf/Netherlands/4/2022      | Erasmus Medical Center                | Erasmus Medical Center                |
| EP0207819 | MP | Netherlands    | 2022-Jun-03 | EP_10_13429200 | A/Caspien Gulf/Netherlands/4/2022      | Erasmus Medical Center                | Erasmus Medical Center                |
| EP0207825 | NP | Netherlands    | 2022-Jun-06 | EP_10_13429201 | A/Sandwich Terry/Netherlands/8/2022    | Erasmus Medical Center                | Erasmus Medical Center                |
| EP0207826 | NS | Netherlands    | 2022-Jun-06 | EP_10_13429201 | A/Sandwich Terry/Netherlands/8/2022    | Erasmus Medical Center                | Erasmus Medical Center                |
| EP0207827 | MP | Netherlands    | 2022-Jun-06 | EP_10_13429201 | A/Sandwich Terry/Netherlands/8/2022    | Erasmus Medical Center                | Erasmus Medical Center                |
| EP0207833 | NP | Netherlands    | 2022-Jun-06 | EP_10_13429202 | A/Sandwich Terry/Netherlands/9/2022    | Erasmus Medical Center                | Erasmus Medical Center                |
| EP0207834 | NS | Netherlands    | 2022-Jun-06 | EP_10_13429202 | A/Sandwich Terry/Netherlands/9/2022    | Erasmus Medical Center                | Erasmus Medical Center                |
| EP0207835 | MP | Netherlands    | 2022-Jun-06 | EP_10_13429202 | A/Sandwich Terry/Netherlands/9/2022    | Erasmus Medical Center                | Erasmus Medical Center                |
| EP0207841 | NP | Netherlands    | 2022-Jun-03 | EP_10_13429203 | A/Black headed gull/Netherlands/1/2022 | Erasmus Medical Center                | Erasmus Medical Center                |
| EP0207842 | NS | Netherlands    | 2022-Jun-03 | EP_10_13429203 | A/Black headed gull/Netherlands/1/2022 | Erasmus Medical Center                | Erasmus Medical Center                |
| EP0207843 | MP | Netherlands    | 2022-Jun-03 | EP_10_13429203 | A/Black headed gull/Netherlands/1/2022 | Erasmus Medical Center                | Erasmus Medical Center                |
| EP0207849 | NP | Netherlands    | 2022-Jun-03 | EP_10_13429204 | A/Black headed gull/Netherlands/1/2022 | Erasmus Medical Center                | Erasmus Medical Center                |
| EP0207850 | NS | Netherlands    | 2022-Jun-03 | EP_10_13429204 | A/Black headed gull/Netherlands/1/2022 | Erasmus Medical Center                | Erasmus Medical Center                |
| EP0207851 | MP | Netherlands    | 2022-Jun-03 | EP_10_13429204 | A/Black headed gull/Netherlands/1/2022 | Erasmus Medical Center                | Erasmus Medical Center                |
| EP0207857 | NP | Netherlands    | 2022-Jun-04 | EP_10_13429205 | A/Sandwich Terry/Netherlands/1/2022    | Erasmus Medical Center                | Erasmus Medical Center                |
| EP0207858 | NS | Netherlands    | 2022-Jun-04 | EP_10_13429205 | A/Sandwich Terry/Netherlands/1/2022    | Erasmus Medical Center                | Erasmus Medical Center                |
| EP0207859 | MP | Netherlands    | 2022-Jun-04 | EP_10_13429205 | A/Sandwich Terry/Netherlands/1/2022    | Erasmus Medical Center                | Erasmus Medical Center                |
| EP0207865 | NP | Netherlands    | 2022-Jun-03 | EP_10_13429206 | A/Sandwich Terry/Netherlands/2/2022    | Erasmus Medical Center                | Erasmus Medical Center                |
| EP0207866 | NS | Netherlands    | 2022-Jun-03 | EP_10_13429206 | A/Sandwich Terry/Netherlands/2/2022    | Erasmus Medical Center                | Erasmus Medical Center                |
| EP0207867 | MP | Netherlands    | 2022-Jun-03 | EP_10_13429206 | A/Sandwich Terry/Netherlands/2/2022    | Erasmus Medical Center                | Erasmus Medical Center                |
| EP0207873 | NP | Netherlands    | 2022-Jun-03 | EP_10_13429207 | A/Sandwich Terry/Netherlands/3/2022    | Erasmus Medical Center                | Erasmus Medical Center                |
| EP0207874 | NS | Netherlands    | 2022-Jun-03 | EP_10_13429207 | A/Sandwich Terry/Netherlands/3/2022    | Erasmus Medical Center                | Erasmus Medical Center                |
| EP0207875 | MP | Netherlands    | 2022-Jun-03 | EP_10_13429207 | A/Sandwich Terry/Netherlands/3/2022    | Erasmus Medical Center                | Erasmus Medical Center                |
| EP0207881 | NP | Netherlands    | 2022-Jun-03 | EP_10_13429208 | A/Common Terry/Netherlands/1/2022      | Erasmus Medical Center                | Erasmus Medical Center                |
| EP0207882 | NS | Netherlands    | 2022-Jun-03 | EP_10_13429208 | A/Common Terry/Netherlands/1/2022      | Erasmus Medical Center                | Erasmus Medical Center                |
| EP0207883 | MP | Netherlands    | 2022-Jun-03 | EP_10_13429208 | A/Common Terry/Netherlands/1/2022      | Erasmus Medical Center                | Erasmus Medical Center                |
| EP0207889 | NP | Netherlands    | 2022-Jun-06 | EP_10_13429209 | A/Sandwich Terry/Netherlands/6/2022    | Erasmus Medical Center                | Erasmus Medical Center                |
| EP0207890 | NS | Netherlands    | 2022-Jun-06 | EP_10_13429209 | A/Sandwich Terry/Netherlands/6/2022    | Erasmus Medical Center                | Erasmus Medical Center                |
| EP0207891 | MP | Netherlands    | 2022-Jun-06 | EP_10_13429209 | A/Sandwich Terry/Netherlands/6/2022    | Erasmus Medical Center                | Erasmus Medical Center                |
| EP0207897 | NP | Netherlands    | 2022-Jun-06 | EP_10_13429300 | A/Sandwich Terry/Netherlands/7/2022    | Erasmus Medical Center                | Erasmus Medical Center                |
| EP0207898 | NS | Netherlands    | 2022-Jun-06 | EP_10_13429300 | A/Sandwich Terry/Netherlands/7/2022    | Erasmus Medical Center                | Erasmus Medical Center                |
| EP0207899 | MP | Netherlands    | 2022-Jun-06 | EP_10_13429300 | A/Sandwich Terry/Netherlands/7/2022    | Erasmus Medical Center                | Erasmus Medical Center                |
| EP0207593 | NP | United Kingdom | 2022-May-18 | EP_10_13453509 | A/domestic_duck/England/073865/2022    | Animal and Plant Health Agency (APHA) | Animal and Plant Health Agency (APHA) |
| EP0207595 | NS | United Kingdom | 2022-May-18 | EP_10_13453509 | A/domestic_duck/England/073865/2022    | Animal and Plant Health Agency (APHA) | Animal and Plant Health Agency (APHA) |
| EP0207596 | MP | United Kingdom | 2022-May-18 | EP_10_13453509 | A/domestic_duck/England/073865/2022    | Animal and Plant Health Agency (APHA) | Animal and Plant Health Agency (APHA) |



|            |    |                |             |                |                                                 |                                        |                                                                |                                                                                                |
|------------|----|----------------|-------------|----------------|-------------------------------------------------|----------------------------------------|----------------------------------------------------------------|------------------------------------------------------------------------------------------------|
| EP02076352 | MP | United Kingdom | 2022-Mar-02 | EP_10_13486944 | A/gossw/Scotland/022033/2022                    | Animal and Plant Health Agency (APHA)  | Animal and Plant Health Agency (APHA)                          |                                                                                                |
| EP02076360 | MP | United Kingdom | 2022-Mar-02 | EP_10_13486957 | A/gossw/Scotland/022034/2022                    | Animal and Plant Health Agency (APHA)  | Animal and Plant Health Agency (APHA)                          |                                                                                                |
| EP02076358 | NP | United Kingdom | 2022-Mar-02 | EP_10_13486957 | A/gossw/Scotland/022034/2022                    | Animal and Plant Health Agency (APHA)  | Animal and Plant Health Agency (APHA)                          |                                                                                                |
| EP02076359 | NS | United Kingdom | 2022-Mar-02 | EP_10_13486957 | A/gossw/Scotland/022034/2022                    | Animal and Plant Health Agency (APHA)  | Animal and Plant Health Agency (APHA)                          |                                                                                                |
| EP02076366 | NP | United Kingdom | 2022-Mar-07 | EP_10_13486969 | A/Greyling_gossw/Scotland/024915/2022           | Animal and Plant Health Agency (APHA)  | Animal and Plant Health Agency (APHA)                          |                                                                                                |
| EP02076367 | NS | United Kingdom | 2022-Mar-07 | EP_10_13486969 | A/Greyling_gossw/Scotland/024915/2022           | Animal and Plant Health Agency (APHA)  | Animal and Plant Health Agency (APHA)                          |                                                                                                |
| EP02076368 | MP | United Kingdom | 2022-Mar-07 | EP_10_13486969 | A/Greyling_gossw/Scotland/024915/2022           | Animal and Plant Health Agency (APHA)  | Animal and Plant Health Agency (APHA)                          |                                                                                                |
| EP02076382 | NP | United Kingdom | 2022-Mar-04 | EP_10_13486990 | A/Mute_Swan/Wales/057697/2022                   | Animal and Plant Health Agency (APHA)  | Animal and Plant Health Agency (APHA)                          |                                                                                                |
| EP02076383 | NS | United Kingdom | 2022-Mar-04 | EP_10_13486990 | A/Mute_Swan/Wales/057697/2022                   | Animal and Plant Health Agency (APHA)  | Animal and Plant Health Agency (APHA)                          |                                                                                                |
| EP02076384 | MP | United Kingdom | 2022-Mar-04 | EP_10_13486990 | A/Mute_Swan/Wales/057697/2022                   | Animal and Plant Health Agency (APHA)  | Animal and Plant Health Agency (APHA)                          |                                                                                                |
| EP02076390 | NP | United Kingdom | 2022-Feb-25 | EP_10_13486962 | A/Dipterohawk/Scotland/022823/2022              | Animal and Plant Health Agency (APHA)  | Animal and Plant Health Agency (APHA)                          |                                                                                                |
| EP02076391 | NS | United Kingdom | 2022-Feb-25 | EP_10_13486962 | A/Dipterohawk/Scotland/022823/2022              | Animal and Plant Health Agency (APHA)  | Animal and Plant Health Agency (APHA)                          |                                                                                                |
| EP02076392 | MP | United Kingdom | 2022-Feb-25 | EP_10_13486962 | A/Dipterohawk/Scotland/022823/2022              | Animal and Plant Health Agency (APHA)  | Animal and Plant Health Agency (APHA)                          |                                                                                                |
| EP02076986 | MP | Belgium        | 2022-Jun-04 | EP_10_13514370 | A/Thalassus sandvicensis/Belgium/7471_0008/2022 | Sciensano - Animal Infectious Diseases | Sciensano, Department of Animal Infectious Diseases            | Van Born, Steven; Rospig, Virginie; Lambrecht, Benedicte; Matthijs, Elisabeth; Steensels, Mike |
| EP02076984 | NP | Belgium        | 2022-Jun-04 | EP_10_13514370 | A/Thalassus sandvicensis/Belgium/7471_0008/2022 | Sciensano - Animal Infectious Diseases | Sciensano, Department of Animal Infectious Diseases            | Van Born, Steven; Rospig, Virginie; Lambrecht, Benedicte; Matthijs, Elisabeth; Steensels, Mike |
| EP02076987 | NS | Belgium        | 2022-Jun-04 | EP_10_13514370 | A/Thalassus sandvicensis/Belgium/7471_0008/2022 | Sciensano - Animal Infectious Diseases | Sciensano, Department of Animal Infectious Diseases            | Van Born, Steven; Rospig, Virginie; Lambrecht, Benedicte; Matthijs, Elisabeth; Steensels, Mike |
| EP02076994 | MP | Belgium        | 2022-Jun-20 | EP_10_13514375 | A/Gallus gallus/Belgium/0602_0002/2022          | Sciensano - Animal Infectious Diseases | Sciensano, Department of Animal Infectious Diseases            | Van Born, Steven; Rospig, Virginie; Lambrecht, Benedicte; Matthijs, Elisabeth; Steensels, Mike |
| EP02076995 | NS | Belgium        | 2022-Jun-20 | EP_10_13514375 | A/Gallus gallus/Belgium/0602_0002/2022          | Sciensano - Animal Infectious Diseases | Sciensano, Department of Animal Infectious Diseases            | Van Born, Steven; Rospig, Virginie; Lambrecht, Benedicte; Matthijs, Elisabeth; Steensels, Mike |
| EP02076992 | NP | Belgium        | 2022-Jun-20 | EP_10_13514375 | A/Gallus gallus/Belgium/0602_0002/2022          | Sciensano - Animal Infectious Diseases | Sciensano, Department of Animal Infectious Diseases            | Van Born, Steven; Rospig, Virginie; Lambrecht, Benedicte; Matthijs, Elisabeth; Steensels, Mike |
| EP02078357 | MP | France         | 2022-May-11 | EP_10_13519461 | A/gal/France/23910197/2022                      | Anses (Poufuges-Rouzans)               | ANSES Agence Nationale De Securite Sanitaire De L'alimentation |                                                                                                |
| EP02078355 | NP | France         | 2022-May-11 | EP_10_13519461 | A/gal/France/23910197/2022                      | Anses (Poufuges-Rouzans)               | ANSES Agence Nationale De Securite Sanitaire De L'alimentation |                                                                                                |
| EP02078358 | NS | France         | 2022-May-11 | EP_10_13519461 | A/gal/France/23910197/2022                      | Anses (Poufuges-Rouzans)               | ANSES Agence Nationale De Securite Sanitaire De L'alimentation |                                                                                                |
| EP02082704 | MP | Netherlands    | 2022-Jun-06 | EP_10_13613219 | A/Greyling Gossw/Netherlands/4/2022             | Erasmus Medical Center                 | Erasmus Medical Center                                         |                                                                                                |
| EP02082702 | NP | Netherlands    | 2022-Jun-06 | EP_10_13613219 | A/Greyling Gossw/Netherlands/4/2022             | Erasmus Medical Center                 | Erasmus Medical Center                                         |                                                                                                |
| EP02082703 | NS | Netherlands    | 2022-Jun-06 | EP_10_13613219 | A/Greyling Gossw/Netherlands/4/2022             | Erasmus Medical Center                 | Erasmus Medical Center                                         |                                                                                                |
| EP02082710 | MP | Netherlands    | 2022-Jun-06 | EP_10_13613220 | A/Greyling Gossw/Netherlands/5/2022             | Erasmus Medical Center                 | Erasmus Medical Center                                         |                                                                                                |
| EP02082711 | NS | Netherlands    | 2022-Jun-06 | EP_10_13613220 | A/Greyling Gossw/Netherlands/5/2022             | Erasmus Medical Center                 | Erasmus Medical Center                                         |                                                                                                |
| EP02082712 | MP | Netherlands    | 2022-Jun-06 | EP_10_13613220 | A/Greyling Gossw/Netherlands/5/2022             | Erasmus Medical Center                 | Erasmus Medical Center                                         |                                                                                                |
| EP02082718 | NP | Netherlands    | 2022-Jun-06 | EP_10_13613221 | A/Greyling Gossw/Netherlands/6/2022             | Erasmus Medical Center                 | Erasmus Medical Center                                         |                                                                                                |
| EP02082719 | NS | Netherlands    | 2022-Jun-06 | EP_10_13613221 | A/Greyling Gossw/Netherlands/6/2022             | Erasmus Medical Center                 | Erasmus Medical Center                                         |                                                                                                |
| EP02082720 | MP | Netherlands    | 2022-Jun-06 | EP_10_13613221 | A/Greyling Gossw/Netherlands/6/2022             | Erasmus Medical Center                 | Erasmus Medical Center                                         |                                                                                                |
| EP02082726 | NP | Netherlands    | 2022-Jun-06 | EP_10_13613222 | A/Greyling Gossw/Netherlands/7/2022             | Erasmus Medical Center                 | Erasmus Medical Center                                         |                                                                                                |
| EP02082727 | NS | Netherlands    | 2022-Jun-06 | EP_10_13613222 | A/Greyling Gossw/Netherlands/7/2022             | Erasmus Medical Center                 | Erasmus Medical Center                                         |                                                                                                |
| EP02082728 | MP | Netherlands    | 2022-Jun-06 | EP_10_13613222 | A/Greyling Gossw/Netherlands/7/2022             | Erasmus Medical Center                 | Erasmus Medical Center                                         |                                                                                                |
| EP02082734 | NP | Netherlands    | 2022-Jun-06 | EP_10_13613223 | A/Greyling Gossw/Netherlands/8/2022             | Erasmus Medical Center                 | Erasmus Medical Center                                         |                                                                                                |



|           |    |             |             |                |                                               |                        |                        |
|-----------|----|-------------|-------------|----------------|-----------------------------------------------|------------------------|------------------------|
| EPIC02775 | NS | Netherlands | 2022-Jun-06 | EP_10_13613221 | A/Greylag Gannet/Netherlands/9/2022           | Erasmus Medical Center | Erasmus Medical Center |
| EPIC02776 | MP | Netherlands | 2022-Jun-06 | EP_10_13613221 | A/Greylag Gannet/Netherlands/9/2022           | Erasmus Medical Center | Erasmus Medical Center |
| EPIC02742 | NP | Netherlands | 2022-Jun-10 | EP_10_13613224 | A/Common Tern/Netherlands/2/2022              | Erasmus Medical Center | Erasmus Medical Center |
| EPIC02743 | NS | Netherlands | 2022-Jun-10 | EP_10_13613224 | A/Common Tern/Netherlands/2/2022              | Erasmus Medical Center | Erasmus Medical Center |
| EPIC02744 | MP | Netherlands | 2022-Jun-10 | EP_10_13613224 | A/Common Tern/Netherlands/2/2022              | Erasmus Medical Center | Erasmus Medical Center |
| EPIC02750 | NP | Netherlands | 2022-Jun-10 | EP_10_13613225 | A/Black-headed gull/Netherlands/7/2022        | Erasmus Medical Center | Erasmus Medical Center |
| EPIC02751 | NS | Netherlands | 2022-Jun-10 | EP_10_13613225 | A/Black-headed gull/Netherlands/7/2022        | Erasmus Medical Center | Erasmus Medical Center |
| EPIC02752 | MP | Netherlands | 2022-Jun-10 | EP_10_13613225 | A/Black-headed gull/Netherlands/7/2022        | Erasmus Medical Center | Erasmus Medical Center |
| EPIC02758 | NP | Netherlands | 2022-Jun-10 | EP_10_13613226 | A/Black-headed gull/Netherlands/8/2022        | Erasmus Medical Center | Erasmus Medical Center |
| EPIC02759 | NS | Netherlands | 2022-Jun-10 | EP_10_13613226 | A/Black-headed gull/Netherlands/8/2022        | Erasmus Medical Center | Erasmus Medical Center |
| EPIC02760 | MP | Netherlands | 2022-Jun-10 | EP_10_13613226 | A/Black-headed gull/Netherlands/8/2022        | Erasmus Medical Center | Erasmus Medical Center |
| EPIC02766 | NP | Netherlands | 2022-Jun-10 | EP_10_13613227 | A/Black-headed gull/Netherlands/9/2022        | Erasmus Medical Center | Erasmus Medical Center |
| EPIC02767 | NS | Netherlands | 2022-Jun-10 | EP_10_13613227 | A/Black-headed gull/Netherlands/9/2022        | Erasmus Medical Center | Erasmus Medical Center |
| EPIC02768 | MP | Netherlands | 2022-Jun-10 | EP_10_13613227 | A/Black-headed gull/Netherlands/9/2022        | Erasmus Medical Center | Erasmus Medical Center |
| EPIC02774 | NP | Netherlands | 2022-Jun-12 | EP_10_13613228 | A/Sandwich Tern/Netherlands/9/2022            | Erasmus Medical Center | Erasmus Medical Center |
| EPIC02775 | NS | Netherlands | 2022-Jun-12 | EP_10_13613228 | A/Sandwich Tern/Netherlands/9/2022            | Erasmus Medical Center | Erasmus Medical Center |
| EPIC02776 | MP | Netherlands | 2022-Jun-12 | EP_10_13613228 | A/Sandwich Tern/Netherlands/9/2022            | Erasmus Medical Center | Erasmus Medical Center |
| EPIC02782 | NP | Netherlands | 2022-Jun-12 | EP_10_13613229 | A/Sandwich Tern/Netherlands/10/2022           | Erasmus Medical Center | Erasmus Medical Center |
| EPIC02783 | NS | Netherlands | 2022-Jun-12 | EP_10_13613229 | A/Sandwich Tern/Netherlands/10/2022           | Erasmus Medical Center | Erasmus Medical Center |
| EPIC02784 | MP | Netherlands | 2022-Jun-12 | EP_10_13613229 | A/Sandwich Tern/Netherlands/10/2022           | Erasmus Medical Center | Erasmus Medical Center |
| EPIC02790 | NP | Netherlands | 2022-Jun-13 | EP_10_13613230 | A/Common Tern/Netherlands/9/2022              | Erasmus Medical Center | Erasmus Medical Center |
| EPIC02791 | NS | Netherlands | 2022-Jun-13 | EP_10_13613230 | A/Common Tern/Netherlands/9/2022              | Erasmus Medical Center | Erasmus Medical Center |
| EPIC02792 | MP | Netherlands | 2022-Jun-13 | EP_10_13613230 | A/Common Tern/Netherlands/9/2022              | Erasmus Medical Center | Erasmus Medical Center |
| EPIC08880 | NP | Netherlands | 2022-Jun-17 | EP_10_13778462 | A/Lesser Black-backed Gull/Netherlands/2/2022 | Erasmus Medical Center | Erasmus Medical Center |
| EPIC08881 | NS | Netherlands | 2022-Jun-17 | EP_10_13778462 | A/Lesser Black-backed Gull/Netherlands/2/2022 | Erasmus Medical Center | Erasmus Medical Center |
| EPIC08882 | MP | Netherlands | 2022-Jun-17 | EP_10_13778462 | A/Lesser Black-backed Gull/Netherlands/2/2022 | Erasmus Medical Center | Erasmus Medical Center |
| EPIC08896 | NP | Netherlands | 2022-Jun-19 | EP_10_13778466 | A/Oystercatcher/Netherlands/2/2022            | Erasmus Medical Center | Erasmus Medical Center |
| EPIC08897 | NS | Netherlands | 2022-Jun-19 | EP_10_13778466 | A/Oystercatcher/Netherlands/2/2022            | Erasmus Medical Center | Erasmus Medical Center |
| EPIC08898 | MP | Netherlands | 2022-Jun-19 | EP_10_13778466 | A/Oystercatcher/Netherlands/2/2022            | Erasmus Medical Center | Erasmus Medical Center |
| EPIC08903 | NP | Netherlands | 2022-Jun-19 | EP_10_13778467 | A/Sandwich Tern/Netherlands/11/2022           | Erasmus Medical Center | Erasmus Medical Center |
| EPIC08904 | NS | Netherlands | 2022-Jun-19 | EP_10_13778467 | A/Sandwich Tern/Netherlands/11/2022           | Erasmus Medical Center | Erasmus Medical Center |
| EPIC08905 | MP | Netherlands | 2022-Jun-19 | EP_10_13778467 | A/Sandwich Tern/Netherlands/11/2022           | Erasmus Medical Center | Erasmus Medical Center |
| EPIC08911 | NP | Netherlands | 2022-Jun-07 | EP_10_13778468 | A/European Herring Gull/Netherlands/9/2022    | Erasmus Medical Center | Erasmus Medical Center |
| EPIC08912 | NS | Netherlands | 2022-Jun-07 | EP_10_13778468 | A/European Herring Gull/Netherlands/9/2022    | Erasmus Medical Center | Erasmus Medical Center |
| EPIC08913 | MP | Netherlands | 2022-Jun-07 | EP_10_13778468 | A/European Herring Gull/Netherlands/9/2022    | Erasmus Medical Center | Erasmus Medical Center |



|           |    |                |             |               |                                           |                                       |                                       |
|-----------|----|----------------|-------------|---------------|-------------------------------------------|---------------------------------------|---------------------------------------|
| EP1208909 | MP | Netherlands    | 2022-Jun-20 | EP_15_1378206 | A/Common Tern/Netherlands/7/2022          | Erasmus Medical Center                | Erasmus Medical Center                |
| EP1208915 | NP | United Kingdom | 2022-Jun-15 | EP_15_1378209 | A/chicken/England/085596/2022             | Animal and Plant Health Agency (APHA) | Animal and Plant Health Agency (APHA) |
| EP1208916 | NS | United Kingdom | 2022-Jun-15 | EP_15_1378209 | A/chicken/England/085596/2022             | Animal and Plant Health Agency (APHA) | Animal and Plant Health Agency (APHA) |
| EP1208917 | MP | United Kingdom | 2022-Jun-15 | EP_15_1378209 | A/chicken/England/085596/2022             | Animal and Plant Health Agency (APHA) | Animal and Plant Health Agency (APHA) |
| EP1208931 | NP | United Kingdom | 2022-Jan-08 | EP_15_1378241 | A/junk_footed_goose/Scotland/003817/2022  | Animal and Plant Health Agency (APHA) | Animal and Plant Health Agency (APHA) |
| EP1208932 | NS | United Kingdom | 2022-Jan-08 | EP_15_1378241 | A/junk_footed_goose/Scotland/003817/2022  | Animal and Plant Health Agency (APHA) | Animal and Plant Health Agency (APHA) |
| EP1208933 | MP | United Kingdom | 2022-Jan-08 | EP_15_1378241 | A/junk_footed_goose/Scotland/003817/2022  | Animal and Plant Health Agency (APHA) | Animal and Plant Health Agency (APHA) |
| EP1209771 | NP | Netherlands    | 2022-Jul-03 | EP_15_1390298 | A/Furazan Curlew/Netherlands/2/2022       | Erasmus Medical Center                | Erasmus Medical Center                |
| EP1209772 | NS | Netherlands    | 2022-Jul-03 | EP_15_1390298 | A/Furazan Curlew/Netherlands/2/2022       | Erasmus Medical Center                | Erasmus Medical Center                |
| EP1209773 | MP | Netherlands    | 2022-Jul-03 | EP_15_1390298 | A/Furazan Curlew/Netherlands/2/2022       | Erasmus Medical Center                | Erasmus Medical Center                |
| EP1210010 | NP | United Kingdom | 2022-Mar-26 | EP_15_1396941 | A/Phob-footed_goose/Scotland/030871/2022  | Animal and Plant Health Agency (APHA) | Animal and Plant Health Agency (APHA) |
| EP1210019 | NS | United Kingdom | 2022-Mar-26 | EP_15_1396941 | A/Phob-footed_goose/Scotland/030871/2022  | Animal and Plant Health Agency (APHA) | Animal and Plant Health Agency (APHA) |
| EP1210034 | MP | United Kingdom | 2022-Mar-26 | EP_15_1396941 | A/Phob-footed_goose/Scotland/030871/2022  | Animal and Plant Health Agency (APHA) | Animal and Plant Health Agency (APHA) |
| EP1210016 | NP | United Kingdom | 2022-Jun-06 | EP_15_1396944 | A/Glanne/Scotland/084490/2022             | Animal and Plant Health Agency (APHA) | Animal and Plant Health Agency (APHA) |
| EP1210017 | NS | United Kingdom | 2022-Jun-06 | EP_15_1396944 | A/Glanne/Scotland/084490/2022             | Animal and Plant Health Agency (APHA) | Animal and Plant Health Agency (APHA) |
| EP1210018 | MP | United Kingdom | 2022-Jun-06 | EP_15_1396944 | A/Glanne/Scotland/084490/2022             | Animal and Plant Health Agency (APHA) | Animal and Plant Health Agency (APHA) |
| EP1210024 | NP | United Kingdom | 2022-Jun-07 | EP_15_1396945 | A/Glanne/Scotland/084624/2022             | Animal and Plant Health Agency (APHA) | Animal and Plant Health Agency (APHA) |
| EP1210025 | NS | United Kingdom | 2022-Jun-07 | EP_15_1396945 | A/Glanne/Scotland/084624/2022             | Animal and Plant Health Agency (APHA) | Animal and Plant Health Agency (APHA) |
| EP1210026 | MP | United Kingdom | 2022-Jun-07 | EP_15_1396945 | A/Glanne/Scotland/084624/2022             | Animal and Plant Health Agency (APHA) | Animal and Plant Health Agency (APHA) |
| EP1210040 | NP | United Kingdom | 2022-Jun-05 | EP_15_1396947 | A/Common_tern/England/248697/2022         | Animal and Plant Health Agency (APHA) | Animal and Plant Health Agency (APHA) |
| EP1210041 | NS | United Kingdom | 2022-Jun-05 | EP_15_1396947 | A/Common_tern/England/248697/2022         | Animal and Plant Health Agency (APHA) | Animal and Plant Health Agency (APHA) |
| EP1210042 | MP | United Kingdom | 2022-Jun-05 | EP_15_1396947 | A/Common_tern/England/248697/2022         | Animal and Plant Health Agency (APHA) | Animal and Plant Health Agency (APHA) |
| EP1210056 | NP | United Kingdom | 2022-Mar-24 | EP_15_1396949 | A/White-fronted_goose/England/111038/2022 | Animal and Plant Health Agency (APHA) | Animal and Plant Health Agency (APHA) |
| EP1210057 | NS | United Kingdom | 2022-Mar-24 | EP_15_1396949 | A/White-fronted_goose/England/111038/2022 | Animal and Plant Health Agency (APHA) | Animal and Plant Health Agency (APHA) |
| EP1210058 | MP | United Kingdom | 2022-Mar-24 | EP_15_1396949 | A/White-fronted_goose/England/111038/2022 | Animal and Plant Health Agency (APHA) | Animal and Plant Health Agency (APHA) |
| EP1210064 | NP | United Kingdom | 2022-Apr-10 | EP_15_1396940 | A/Mute_swan/Wales/058562/2022             | Animal and Plant Health Agency (APHA) | Animal and Plant Health Agency (APHA) |
| EP1210065 | NS | United Kingdom | 2022-Apr-10 | EP_15_1396940 | A/Mute_swan/Wales/058562/2022             | Animal and Plant Health Agency (APHA) | Animal and Plant Health Agency (APHA) |
| EP1210066 | MP | United Kingdom | 2022-Apr-10 | EP_15_1396940 | A/Mute_swan/Wales/058562/2022             | Animal and Plant Health Agency (APHA) | Animal and Plant Health Agency (APHA) |
| EP1210880 | NP | United Kingdom | 2022-Jul-04 | EP_15_1406493 | A/chicken/Scotland/090391/2022            | Animal and Plant Health Agency (APHA) | Animal and Plant Health Agency (APHA) |
| EP1210881 | NS | United Kingdom | 2022-Jul-04 | EP_15_1406493 | A/chicken/Scotland/090391/2022            | Animal and Plant Health Agency (APHA) | Animal and Plant Health Agency (APHA) |
| EP1210882 | MP | United Kingdom | 2022-Jul-04 | EP_15_1406493 | A/chicken/Scotland/090391/2022            | Animal and Plant Health Agency (APHA) | Animal and Plant Health Agency (APHA) |
| EP1210888 | NP | United Kingdom | 2022-Jul-06 | EP_15_1406494 | A/chicken/England/093450/2022             | Animal and Plant Health Agency (APHA) | Animal and Plant Health Agency (APHA) |
| EP1210889 | NS | United Kingdom | 2022-Jul-06 | EP_15_1406494 | A/chicken/England/093450/2022             | Animal and Plant Health Agency (APHA) | Animal and Plant Health Agency (APHA) |
| EP1210890 | MP | United Kingdom | 2022-Jul-06 | EP_15_1406494 | A/chicken/England/093450/2022             | Animal and Plant Health Agency (APHA) | Animal and Plant Health Agency (APHA) |
| EP1210896 | NP | United Kingdom | 2022-Jul-06 | EP_15_1406495 | A/Domestic_goose/England/093460/2022      | Animal and Plant Health Agency (APHA) | Animal and Plant Health Agency (APHA) |

|            |    |                |            |                |                                             |                                       |                                       |
|------------|----|----------------|------------|----------------|---------------------------------------------|---------------------------------------|---------------------------------------|
| EP2210897  | NS | United Kingdom | 2022-10-06 | EP_15_14084985 | A/Domestic_goose/England/093469/2022        | Animal and Plant Health Agency (APHA) | Animal and Plant Health Agency (APHA) |
| EP2210898  | MP | United Kingdom | 2022-10-06 | EP_15_14084985 | A/Domestic_goose/England/093469/2022        | Animal and Plant Health Agency (APHA) | Animal and Plant Health Agency (APHA) |
| EP22113995 | NP | Netherlands    | 2022-10-07 | EP_15_14159711 | A/Common Tern/Netherlands/10/2022           | Erasmus Medical Center                | Erasmus Medical Center                |
| EP22113996 | NS | Netherlands    | 2022-10-07 | EP_15_14159711 | A/Common Tern/Netherlands/10/2022           | Erasmus Medical Center                | Erasmus Medical Center                |
| EP22113997 | MP | Netherlands    | 2022-10-07 | EP_15_14159711 | A/Common Tern/Netherlands/10/2022           | Erasmus Medical Center                | Erasmus Medical Center                |
| EP22114003 | NP | Netherlands    | 2022-10-07 | EP_15_14159712 | A/European Herring Gull/Netherlands/9/2022  | Erasmus Medical Center                | Erasmus Medical Center                |
| EP22114004 | NS | Netherlands    | 2022-10-07 | EP_15_14159712 | A/European Herring Gull/Netherlands/9/2022  | Erasmus Medical Center                | Erasmus Medical Center                |
| EP22114005 | MP | Netherlands    | 2022-10-07 | EP_15_14159712 | A/European Herring Gull/Netherlands/9/2022  | Erasmus Medical Center                | Erasmus Medical Center                |
| EP22114011 | NP | Netherlands    | 2022-10-08 | EP_15_14159713 | A/Caspian Gull/Netherlands/5/2022           | Erasmus Medical Center                | Erasmus Medical Center                |
| EP22114012 | NS | Netherlands    | 2022-10-08 | EP_15_14159713 | A/Caspian Gull/Netherlands/5/2022           | Erasmus Medical Center                | Erasmus Medical Center                |
| EP22114013 | MP | Netherlands    | 2022-10-08 | EP_15_14159713 | A/Caspian Gull/Netherlands/5/2022           | Erasmus Medical Center                | Erasmus Medical Center                |
| EP22114019 | NP | Netherlands    | 2022-10-04 | EP_15_14159714 | A/European Herring Gull/Netherlands/9/2022  | Erasmus Medical Center                | Erasmus Medical Center                |
| EP22114020 | NS | Netherlands    | 2022-10-04 | EP_15_14159714 | A/European Herring Gull/Netherlands/9/2022  | Erasmus Medical Center                | Erasmus Medical Center                |
| EP22114021 | MP | Netherlands    | 2022-10-04 | EP_15_14159714 | A/European Herring Gull/Netherlands/9/2022  | Erasmus Medical Center                | Erasmus Medical Center                |
| EP22114027 | NP | Netherlands    | 2022-10-12 | EP_15_14159715 | A/Graylag Goose/Netherlands/9/2022          | Erasmus Medical Center                | Erasmus Medical Center                |
| EP22114028 | NS | Netherlands    | 2022-10-12 | EP_15_14159715 | A/Graylag Goose/Netherlands/9/2022          | Erasmus Medical Center                | Erasmus Medical Center                |
| EP22114029 | MP | Netherlands    | 2022-10-12 | EP_15_14159715 | A/Graylag Goose/Netherlands/9/2022          | Erasmus Medical Center                | Erasmus Medical Center                |
| EP22114031 | NP | Netherlands    | 2022-10-11 | EP_15_14171729 | A/Turkmen Spoonbill/Netherlands/14/2022     | Erasmus Medical Center                | Erasmus Medical Center                |
| EP22114032 | NS | Netherlands    | 2022-10-11 | EP_15_14171729 | A/Turkmen Spoonbill/Netherlands/14/2022     | Erasmus Medical Center                | Erasmus Medical Center                |
| EP22114033 | MP | Netherlands    | 2022-10-11 | EP_15_14171729 | A/Turkmen Spoonbill/Netherlands/14/2022     | Erasmus Medical Center                | Erasmus Medical Center                |
| EP22114039 | NP | Netherlands    | 2022-10-11 | EP_15_14171741 | A/Turkmen Spoonbill/Netherlands/18/2022     | Erasmus Medical Center                | Erasmus Medical Center                |
| EP22114040 | NS | Netherlands    | 2022-10-11 | EP_15_14171741 | A/Turkmen Spoonbill/Netherlands/18/2022     | Erasmus Medical Center                | Erasmus Medical Center                |
| EP22114041 | MP | Netherlands    | 2022-10-11 | EP_15_14171741 | A/Turkmen Spoonbill/Netherlands/18/2022     | Erasmus Medical Center                | Erasmus Medical Center                |
| EP22119105 | MP | Netherlands    | 2022-10-24 | EP_15_14233939 | A/Turkmen Spoonbill/Netherlands/1/2022      | Erasmus Medical Center                | Erasmus Medical Center                |
| EP22119103 | NP | Netherlands    | 2022-10-24 | EP_15_14233939 | A/Turkmen Spoonbill/Netherlands/1/2022      | Erasmus Medical Center                | Erasmus Medical Center                |
| EP22119104 | NS | Netherlands    | 2022-10-24 | EP_15_14233939 | A/Turkmen Spoonbill/Netherlands/1/2022      | Erasmus Medical Center                | Erasmus Medical Center                |
| EP22119173 | MP | Netherlands    | 2022-10-15 | EP_15_14233920 | A/Common Tern/Netherlands/17/2022           | Erasmus Medical Center                | Erasmus Medical Center                |
| EP22119171 | NP | Netherlands    | 2022-10-15 | EP_15_14233920 | A/Common Tern/Netherlands/17/2022           | Erasmus Medical Center                | Erasmus Medical Center                |
| EP22119172 | NS | Netherlands    | 2022-10-15 | EP_15_14233920 | A/Common Tern/Netherlands/17/2022           | Erasmus Medical Center                | Erasmus Medical Center                |
| EP22119181 | MP | Netherlands    | 2022-10-15 | EP_15_14233921 | A/Common Tern/Netherlands/18/2022           | Erasmus Medical Center                | Erasmus Medical Center                |
| EP22119179 | NP | Netherlands    | 2022-10-15 | EP_15_14233921 | A/Common Tern/Netherlands/18/2022           | Erasmus Medical Center                | Erasmus Medical Center                |
| EP22119180 | NS | Netherlands    | 2022-10-15 | EP_15_14233921 | A/Common Tern/Netherlands/18/2022           | Erasmus Medical Center                | Erasmus Medical Center                |
| EP22119189 | MP | Netherlands    | 2022-10-19 | EP_15_14233922 | A/European Herring Gull/Netherlands/11/2022 | Erasmus Medical Center                | Erasmus Medical Center                |
| EP22119187 | NP | Netherlands    | 2022-10-19 | EP_15_14233922 | A/European Herring Gull/Netherlands/11/2022 | Erasmus Medical Center                | Erasmus Medical Center                |
| EP22119188 | NS | Netherlands    | 2022-10-19 | EP_15_14233922 | A/European Herring Gull/Netherlands/11/2022 | Erasmus Medical Center                | Erasmus Medical Center                |

|            |    |             |            |                |                                               |                                        |                                                     |                                                                                                 |
|------------|----|-------------|------------|----------------|-----------------------------------------------|----------------------------------------|-----------------------------------------------------|-------------------------------------------------------------------------------------------------|
| EP1219197  | MP | Netherlands | 2022-06-15 | EP_15_14233923 | A/Caspian Gull/Netherlands/7/2022             | Erasmus Medical Center                 | Erasmus Medical Center                              |                                                                                                 |
| EP1219195  | NP | Netherlands | 2022-06-15 | EP_15_14233923 | A/Caspian Gull/Netherlands/7/2022             | Erasmus Medical Center                 | Erasmus Medical Center                              |                                                                                                 |
| EP1219196  | NS | Netherlands | 2022-06-15 | EP_15_14233923 | A/Caspian Gull/Netherlands/7/2022             | Erasmus Medical Center                 | Erasmus Medical Center                              |                                                                                                 |
| EP1219203  | MP | Netherlands | 2022-06-22 | EP_15_14233924 | A/Common Tern/Netherlands/19/2022             | Erasmus Medical Center                 | Erasmus Medical Center                              |                                                                                                 |
| EP1219201  | NP | Netherlands | 2022-06-22 | EP_15_14233924 | A/Common Tern/Netherlands/19/2022             | Erasmus Medical Center                 | Erasmus Medical Center                              |                                                                                                 |
| EP1219202  | NS | Netherlands | 2022-06-22 | EP_15_14233924 | A/Common Tern/Netherlands/19/2022             | Erasmus Medical Center                 | Erasmus Medical Center                              |                                                                                                 |
| EP1219211  | MP | Netherlands | 2022-06-22 | EP_15_14233925 | A/Common Tern/Netherlands/20/2022             | Erasmus Medical Center                 | Erasmus Medical Center                              |                                                                                                 |
| EP1219209  | NP | Netherlands | 2022-06-22 | EP_15_14233925 | A/Common Tern/Netherlands/20/2022             | Erasmus Medical Center                 | Erasmus Medical Center                              |                                                                                                 |
| EP1219210  | NS | Netherlands | 2022-06-22 | EP_15_14233925 | A/Common Tern/Netherlands/20/2022             | Erasmus Medical Center                 | Erasmus Medical Center                              |                                                                                                 |
| EP1219219  | MP | Netherlands | 2022-06-14 | EP_15_14233926 | A/European Herring Gull/Netherlands/10/2022   | Erasmus Medical Center                 | Erasmus Medical Center                              |                                                                                                 |
| EP1219217  | NP | Netherlands | 2022-06-14 | EP_15_14233926 | A/European Herring Gull/Netherlands/10/2022   | Erasmus Medical Center                 | Erasmus Medical Center                              |                                                                                                 |
| EP1219218  | NS | Netherlands | 2022-06-14 | EP_15_14233926 | A/European Herring Gull/Netherlands/10/2022   | Erasmus Medical Center                 | Erasmus Medical Center                              |                                                                                                 |
| EP1219225  | MP | Netherlands | 2022-06-14 | EP_15_14233927 | A/Common Tern/Netherlands/11/2022             | Erasmus Medical Center                 | Erasmus Medical Center                              |                                                                                                 |
| EP1219223  | NP | Netherlands | 2022-06-14 | EP_15_14233927 | A/Common Tern/Netherlands/11/2022             | Erasmus Medical Center                 | Erasmus Medical Center                              |                                                                                                 |
| EP1219224  | NS | Netherlands | 2022-06-14 | EP_15_14233927 | A/Common Tern/Netherlands/11/2022             | Erasmus Medical Center                 | Erasmus Medical Center                              |                                                                                                 |
| EP1219239  | MP | Netherlands | 2022-06-14 | EP_15_14233929 | A/Common Tern/Netherlands/12/2022             | Erasmus Medical Center                 | Erasmus Medical Center                              |                                                                                                 |
| EP1219237  | NP | Netherlands | 2022-06-14 | EP_15_14233929 | A/Common Tern/Netherlands/12/2022             | Erasmus Medical Center                 | Erasmus Medical Center                              |                                                                                                 |
| EP1219238  | NS | Netherlands | 2022-06-14 | EP_15_14233929 | A/Common Tern/Netherlands/12/2022             | Erasmus Medical Center                 | Erasmus Medical Center                              |                                                                                                 |
| EP1219244  | MP | Netherlands | 2022-06-14 | EP_15_14233930 | A/Common Tern/Netherlands/14/2022             | Erasmus Medical Center                 | Erasmus Medical Center                              |                                                                                                 |
| EP1219245  | NS | Netherlands | 2022-06-14 | EP_15_14233930 | A/Common Tern/Netherlands/14/2022             | Erasmus Medical Center                 | Erasmus Medical Center                              |                                                                                                 |
| EP1219246  | MP | Netherlands | 2022-06-14 | EP_15_14233930 | A/Common Tern/Netherlands/14/2022             | Erasmus Medical Center                 | Erasmus Medical Center                              |                                                                                                 |
| EP1219254  | MP | Netherlands | 2022-06-14 | EP_15_14233931 | A/Common Tern/Netherlands/15/2022             | Erasmus Medical Center                 | Erasmus Medical Center                              |                                                                                                 |
| EP1219252  | NP | Netherlands | 2022-06-14 | EP_15_14233931 | A/Common Tern/Netherlands/15/2022             | Erasmus Medical Center                 | Erasmus Medical Center                              |                                                                                                 |
| EP1219253  | NS | Netherlands | 2022-06-14 | EP_15_14233931 | A/Common Tern/Netherlands/15/2022             | Erasmus Medical Center                 | Erasmus Medical Center                              |                                                                                                 |
| EP1219262  | MP | Netherlands | 2022-06-14 | EP_15_14233932 | A/Common Tern/Netherlands/16/2022             | Erasmus Medical Center                 | Erasmus Medical Center                              |                                                                                                 |
| EP1219260  | NP | Netherlands | 2022-06-14 | EP_15_14233932 | A/Common Tern/Netherlands/16/2022             | Erasmus Medical Center                 | Erasmus Medical Center                              |                                                                                                 |
| EP1219261  | NS | Netherlands | 2022-06-14 | EP_15_14233932 | A/Common Tern/Netherlands/16/2022             | Erasmus Medical Center                 | Erasmus Medical Center                              |                                                                                                 |
| EP1219270  | MP | Netherlands | 2022-06-15 | EP_15_14233944 | A/Caspian Gull/Netherlands/6/2022             | Erasmus Medical Center                 | Erasmus Medical Center                              |                                                                                                 |
| EP1219268  | NP | Netherlands | 2022-06-15 | EP_15_14233944 | A/Caspian Gull/Netherlands/6/2022             | Erasmus Medical Center                 | Erasmus Medical Center                              |                                                                                                 |
| EP1219269  | NS | Netherlands | 2022-06-15 | EP_15_14233944 | A/Caspian Gull/Netherlands/6/2022             | Erasmus Medical Center                 | Erasmus Medical Center                              |                                                                                                 |
| EP12122828 | MP | Belgium     | 2022-06-06 | EP_15_14189131 | A/Cervus argenteus/Belgium/595_0008/2022      | Sciensano - Animal Infectious Diseases | Sciensano, Department of Animal Infectious Diseases | Van Born, Steven; Vandenbussche, Frank; Rogier, Virginie; Lambrecht, Benedicte; Stoenkel, Marko |
| EP12122829 | NS | Belgium     | 2022-06-06 | EP_15_14189131 | A/Cervus argenteus/Belgium/595_0008/2022      | Sciensano - Animal Infectious Diseases | Sciensano, Department of Animal Infectious Diseases | Van Born, Steven; Vandenbussche, Frank; Rogier, Virginie; Lambrecht, Benedicte; Stoenkel, Marko |
| EP12122826 | NP | Belgium     | 2022-06-06 | EP_15_14189131 | A/Cervus argenteus/Belgium/595_0008/2022      | Sciensano - Animal Infectious Diseases | Sciensano, Department of Animal Infectious Diseases | Van Born, Steven; Vandenbussche, Frank; Rogier, Virginie; Lambrecht, Benedicte; Stoenkel, Marko |
| EP12122836 | MP | Belgium     | 2022-06-24 | EP_15_14189148 | A/Trichinella spiralis/Belgium/1234_0008/2022 | Sciensano - Animal Infectious Diseases | Sciensano, Department of Animal Infectious Diseases | Van Born, Steven; Vandenbussche, Frank; Rogier, Virginie; Lambrecht, Benedicte; Stoenkel, Marko |
| EP12122837 | NS | Belgium     | 2022-06-24 | EP_15_14189148 | A/Trichinella spiralis/Belgium/1234_0008/2022 | Sciensano - Animal Infectious Diseases | Sciensano, Department of Animal Infectious Diseases | Van Born, Steven; Vandenbussche, Frank; Rogier, Virginie; Lambrecht, Benedicte; Stoenkel, Marko |



|            |    |                |             |               |                                             |                                        |                                                     |                                                                                                                                             |
|------------|----|----------------|-------------|---------------|---------------------------------------------|----------------------------------------|-----------------------------------------------------|---------------------------------------------------------------------------------------------------------------------------------------------|
| EP1212856  | NS | Netherlands    | 2022-Jul-29 | EP_1S_1448990 | A/Common Tern/Netherlands/22/2022           | Erasmus Medical Center                 | Erasmus Medical Center                              |                                                                                                                                             |
| EP1212857  | MP | Netherlands    | 2022-Jul-29 | EP_1S_1448990 | A/Common Tern/Netherlands/22/2022           | Erasmus Medical Center                 | Erasmus Medical Center                              |                                                                                                                                             |
| EP1212863  | NP | Netherlands    | 2022-Jul-29 | EP_1S_1448991 | A/Common Tern/Netherlands/23/2022           | Erasmus Medical Center                 | Erasmus Medical Center                              |                                                                                                                                             |
| EP1212864  | NS | Netherlands    | 2022-Jul-29 | EP_1S_1448991 | A/Common Tern/Netherlands/23/2022           | Erasmus Medical Center                 | Erasmus Medical Center                              |                                                                                                                                             |
| EP1212865  | MP | Netherlands    | 2022-Jul-29 | EP_1S_1448991 | A/Common Tern/Netherlands/23/2022           | Erasmus Medical Center                 | Erasmus Medical Center                              |                                                                                                                                             |
| EP1212871  | NP | Netherlands    | 2022-Jul-29 | EP_1S_1448992 | A/Common Tern/Netherlands/24/2022           | Erasmus Medical Center                 | Erasmus Medical Center                              |                                                                                                                                             |
| EP1212872  | NS | Netherlands    | 2022-Jul-29 | EP_1S_1448992 | A/Common Tern/Netherlands/24/2022           | Erasmus Medical Center                 | Erasmus Medical Center                              |                                                                                                                                             |
| EP1212873  | MP | Netherlands    | 2022-Jul-29 | EP_1S_1448992 | A/Common Tern/Netherlands/24/2022           | Erasmus Medical Center                 | Erasmus Medical Center                              |                                                                                                                                             |
| EP1212879  | NP | Netherlands    | 2022-Jul-30 | EP_1S_1448993 | A/Common Tern/Netherlands/25/2022           | Erasmus Medical Center                 | Erasmus Medical Center                              |                                                                                                                                             |
| EP1212880  | NS | Netherlands    | 2022-Jul-30 | EP_1S_1448993 | A/Common Tern/Netherlands/25/2022           | Erasmus Medical Center                 | Erasmus Medical Center                              |                                                                                                                                             |
| EP1212881  | MP | Netherlands    | 2022-Jul-30 | EP_1S_1448993 | A/Common Tern/Netherlands/25/2022           | Erasmus Medical Center                 | Erasmus Medical Center                              |                                                                                                                                             |
| EP1212974  | NP | Netherlands    | 2022-Jun-03 | EP_1S_1449315 | A/White stork/Netherlands/22012595-022/2022 | Wageningen Bioveterinary Research      | Wageningen Bioveterinary Research                   | Beersma, Nancy; Handers, Frank; Pita-Verschuuren, Sylvia; Rooze, Marij; Voncken, Sandra; Germeaad, Evelien; Daghfene, Marc; Heuvelink, Rene |
| EP12129742 | NS | Netherlands    | 2022-Jun-03 | EP_1S_1449315 | A/White stork/Netherlands/22012595-022/2022 | Wageningen Bioveterinary Research      | Wageningen Bioveterinary Research                   | Beersma, Nancy; Handers, Frank; Pita-Verschuuren, Sylvia; Rooze, Marij; Voncken, Sandra; Germeaad, Evelien; Daghfene, Marc; Heuvelink, Rene |
| EP12129743 | MP | Netherlands    | 2022-Jun-03 | EP_1S_1449315 | A/White stork/Netherlands/22012595-022/2022 | Wageningen Bioveterinary Research      | Wageningen Bioveterinary Research                   | Beersma, Nancy; Handers, Frank; Pita-Verschuuren, Sylvia; Rooze, Marij; Voncken, Sandra; Germeaad, Evelien; Daghfene, Marc; Heuvelink, Rene |
| EP12129817 | NP | Belgium        | 2022-Apr-16 | EP_1S_1449399 | A/Vulpes_vulpes/Belgium/8660_0016/2022      | Sciensano - Animal Infectious Diseases | Sciensano, Department of Animal Infectious Diseases | Van Born, Steven; Methijs, Elisabeth; Rouppe, Virginie; Verwilt, Mariel; Lambrecht, Benedicte; Steensels, Mieke                             |
| EP12129819 | MP | Belgium        | 2022-Apr-16 | EP_1S_1449399 | A/Vulpes_vulpes/Belgium/8660_0016/2022      | Sciensano - Animal Infectious Diseases | Sciensano, Department of Animal Infectious Diseases | Van Born, Steven; Methijs, Elisabeth; Rouppe, Virginie; Verwilt, Mariel; Lambrecht, Benedicte; Steensels, Mieke                             |
| EP12129820 | NS | Belgium        | 2022-Apr-16 | EP_1S_1449399 | A/Vulpes_vulpes/Belgium/8660_0016/2022      | Sciensano - Animal Infectious Diseases | Sciensano, Department of Animal Infectious Diseases | Van Born, Steven; Methijs, Elisabeth; Rouppe, Virginie; Verwilt, Mariel; Lambrecht, Benedicte; Steensels, Mieke                             |
| EP12129828 | NS | Belgium        | 2022-Jul-08 | EP_1S_1449421 | A/Larus_argentatus/Belgium/9051_0001/2022   | Sciensano - Animal Infectious Diseases | Sciensano, Department of Animal Infectious Diseases | Van Born, Steven; Methijs, Elisabeth; Rouppe, Virginie; Lambrecht, Benedicte; Steensels, Mieke                                              |
| EP12129825 | NP | Belgium        | 2022-Jul-08 | EP_1S_1449421 | A/Larus_argentatus/Belgium/9051_0001/2022   | Sciensano - Animal Infectious Diseases | Sciensano, Department of Animal Infectious Diseases | Van Born, Steven; Methijs, Elisabeth; Rouppe, Virginie; Lambrecht, Benedicte; Steensels, Mieke                                              |
| EP12129827 | MP | Belgium        | 2022-Jul-08 | EP_1S_1449421 | A/Larus_argentatus/Belgium/9051_0001/2022   | Sciensano - Animal Infectious Diseases | Sciensano, Department of Animal Infectious Diseases | Van Born, Steven; Methijs, Elisabeth; Rouppe, Virginie; Lambrecht, Benedicte; Steensels, Mieke                                              |
| EP12129825 | MP | Belgium        | 2022-Jun-16 | EP_1S_1449476 | A/Vulpes_vulpes/Belgium/9031_0008/2022      | Sciensano - Animal Infectious Diseases | Sciensano, Department of Animal Infectious Diseases | Van Born, Steven; Methijs, Elisabeth; Rouppe, Virginie; Verwilt, Mariel; Lambrecht, Benedicte; Steensels, Mieke                             |
| EP12129836 | NS | Belgium        | 2022-Jun-16 | EP_1S_1449476 | A/Vulpes_vulpes/Belgium/9031_0008/2022      | Sciensano - Animal Infectious Diseases | Sciensano, Department of Animal Infectious Diseases | Van Born, Steven; Methijs, Elisabeth; Rouppe, Virginie; Verwilt, Mariel; Lambrecht, Benedicte; Steensels, Mieke                             |
| EP12129833 | NP | Belgium        | 2022-Jun-16 | EP_1S_1449476 | A/Vulpes_vulpes/Belgium/9031_0008/2022      | Sciensano - Animal Infectious Diseases | Sciensano, Department of Animal Infectious Diseases | Van Born, Steven; Methijs, Elisabeth; Rouppe, Virginie; Verwilt, Mariel; Lambrecht, Benedicte; Steensels, Mieke                             |
| EP12129843 | MP | Belgium        | 2022-Aug-03 | EP_1S_1449493 | A/Gallus_gallus/Belgium/9548_0001/2022      | Sciensano - Animal Infectious Diseases | Sciensano, Department of Animal Infectious Diseases | Van Born, Steven; Methijs, Elisabeth; Rouppe, Virginie; Lambrecht, Benedicte; Steensels, Mieke                                              |
| EP12129844 | NS | Belgium        | 2022-Aug-03 | EP_1S_1449493 | A/Gallus_gallus/Belgium/9548_0001/2022      | Sciensano - Animal Infectious Diseases | Sciensano, Department of Animal Infectious Diseases | Van Born, Steven; Methijs, Elisabeth; Rouppe, Virginie; Lambrecht, Benedicte; Steensels, Mieke                                              |
| EP12129841 | NP | Belgium        | 2022-Aug-03 | EP_1S_1449493 | A/Gallus_gallus/Belgium/9548_0001/2022      | Sciensano - Animal Infectious Diseases | Sciensano, Department of Animal Infectious Diseases | Van Born, Steven; Methijs, Elisabeth; Rouppe, Virginie; Lambrecht, Benedicte; Steensels, Mieke                                              |
| EP1212896  | NP | Netherlands    | 2022-Aug-10 | EP_1S_1449721 | A/Eurasian Spoonbill/Netherlands/4/2022     | Erasmus Medical Center                 | Erasmus Medical Center                              |                                                                                                                                             |
| EP1212897  | NS | Netherlands    | 2022-Aug-10 | EP_1S_1449721 | A/Eurasian Spoonbill/Netherlands/4/2022     | Erasmus Medical Center                 | Erasmus Medical Center                              |                                                                                                                                             |
| EP1212908  | MP | Netherlands    | 2022-Aug-10 | EP_1S_1449721 | A/Eurasian Spoonbill/Netherlands/4/2022     | Erasmus Medical Center                 | Erasmus Medical Center                              |                                                                                                                                             |
| EP12129879 | NP | United Kingdom | 2022-Jul-26 | EP_1S_1449787 | A/Idemestis_duck/England/100990/2022        | Animal and Plant Health Agency (APHA)  | Animal and Plant Health Agency (APHA)               |                                                                                                                                             |
| EP12129880 | NS | United Kingdom | 2022-Jul-26 | EP_1S_1449787 | A/Idemestis_duck/England/100990/2022        | Animal and Plant Health Agency (APHA)  | Animal and Plant Health Agency (APHA)               |                                                                                                                                             |
| EP12129881 | MP | United Kingdom | 2022-Jul-26 | EP_1S_1449787 | A/Idemestis_duck/England/100990/2022        | Animal and Plant Health Agency (APHA)  | Animal and Plant Health Agency (APHA)               |                                                                                                                                             |
| EP12129896 | NP | United Kingdom | 2022-Aug-05 | EP_1S_1449795 | A/Idemestis_duck/England/104859/2022        | Animal and Plant Health Agency (APHA)  | Animal and Plant Health Agency (APHA)               |                                                                                                                                             |
| EP12128997 | NS | United Kingdom | 2022-Aug-05 | EP_1S_1449795 | A/Idemestis_duck/England/104859/2022        | Animal and Plant Health Agency (APHA)  | Animal and Plant Health Agency (APHA)               |                                                                                                                                             |
| EP12129898 | MP | United Kingdom | 2022-Aug-05 | EP_1S_1449795 | A/Idemestis_duck/England/104859/2022        | Animal and Plant Health Agency (APHA)  | Animal and Plant Health Agency (APHA)               |                                                                                                                                             |

|          |    |                |             |                |                                          |                                                                            |                                       |
|----------|----|----------------|-------------|----------------|------------------------------------------|----------------------------------------------------------------------------|---------------------------------------|
| EP212904 | NP | United Kingdom | 2022-Aug-07 | EP_18_14497970 | A/domestic_buck/England/220414/2022      | Animal and Plant Health Agency (APHA)                                      | Animal and Plant Health Agency (APHA) |
| EP212905 | NS | United Kingdom | 2022-Aug-07 | EP_18_14497970 | A/domestic_buck/England/220414/2022      | Animal and Plant Health Agency (APHA)                                      | Animal and Plant Health Agency (APHA) |
| EP212906 | MP | United Kingdom | 2022-Aug-07 | EP_18_14497970 | A/domestic_buck/England/220414/2022      | Animal and Plant Health Agency (APHA)                                      | Animal and Plant Health Agency (APHA) |
| EP212912 | NP | United Kingdom | 2022-Aug-09 | EP_18_14497885 | A/domestic_goose/England/220801/2022     | Animal and Plant Health Agency (APHA)                                      | Animal and Plant Health Agency (APHA) |
| EP212913 | NS | United Kingdom | 2022-Aug-09 | EP_18_14497885 | A/domestic_goose/England/220801/2022     | Animal and Plant Health Agency (APHA)                                      | Animal and Plant Health Agency (APHA) |
| EP212914 | MP | United Kingdom | 2022-Aug-09 | EP_18_14497885 | A/domestic_goose/England/220801/2022     | Animal and Plant Health Agency (APHA)                                      | Animal and Plant Health Agency (APHA) |
| EP213104 | NP | Germany        | 2022-Jun-07 | EP_18_14571430 | A/common tern/Germany-NI/A03189/2022     | Lebensmittel- und Veterinärinstitut Oldenburg - Standort Veterinärinstitut | Friedrich-Loeffler-Institut           |
| EP213105 | NS | Germany        | 2022-Jun-07 | EP_18_14571430 | A/common tern/Germany-NI/A03189/2022     | Lebensmittel- und Veterinärinstitut Oldenburg - Standort Veterinärinstitut | Friedrich-Loeffler-Institut           |
| EP213102 | MP | Germany        | 2022-Jun-07 | EP_18_14571430 | A/common tern/Germany-NI/A03185/2022     | Lebensmittel- und Veterinärinstitut Oldenburg - Standort Veterinärinstitut | Friedrich-Loeffler-Institut           |
| EP213111 | MP | Germany        | 2022-Jun-07 | EP_18_14571432 | A/common tern/Germany-NI/A03186/2022     | Lebensmittel- und Veterinärinstitut Oldenburg - Standort Veterinärinstitut | Friedrich-Loeffler-Institut           |
| EP213113 | NP | Germany        | 2022-Jun-07 | EP_18_14571432 | A/common tern/Germany-NI/A03186/2022     | Lebensmittel- und Veterinärinstitut Oldenburg - Standort Veterinärinstitut | Friedrich-Loeffler-Institut           |
| EP213115 | NS | Germany        | 2022-Jun-07 | EP_18_14571432 | A/common tern/Germany-NI/A03186/2022     | Lebensmittel- und Veterinärinstitut Oldenburg - Standort Veterinärinstitut | Friedrich-Loeffler-Institut           |
| EP213125 | MP | Germany        | 2022-Jun-16 | EP_18_14571434 | A/common tern/Germany-NI/A03132/2022     | Lebensmittel- und Veterinärinstitut Oldenburg - Standort Veterinärinstitut | Friedrich-Loeffler-Institut           |
| EP213128 | NP | Germany        | 2022-Jun-16 | EP_18_14571434 | A/common tern/Germany-NI/A03132/2022     | Lebensmittel- und Veterinärinstitut Oldenburg - Standort Veterinärinstitut | Friedrich-Loeffler-Institut           |
| EP213129 | NS | Germany        | 2022-Jun-16 | EP_18_14571434 | A/common tern/Germany-NI/A03132/2022     | Lebensmittel- und Veterinärinstitut Oldenburg - Standort Veterinärinstitut | Friedrich-Loeffler-Institut           |
| EP213134 | MP | Germany        | 2022-Jun-14 | EP_18_14571436 | A/common tern/Germany-NI/A03130/2022     | Lebensmittel- und Veterinärinstitut Oldenburg - Standort Veterinärinstitut | Friedrich-Loeffler-Institut           |
| EP213136 | NP | Germany        | 2022-Jun-14 | EP_18_14571436 | A/common tern/Germany-NI/A03130/2022     | Lebensmittel- und Veterinärinstitut Oldenburg - Standort Veterinärinstitut | Friedrich-Loeffler-Institut           |
| EP213137 | NS | Germany        | 2022-Jun-14 | EP_18_14571436 | A/common tern/Germany-NI/A03130/2022     | Lebensmittel- und Veterinärinstitut Oldenburg - Standort Veterinärinstitut | Friedrich-Loeffler-Institut           |
| EP213140 | MP | Germany        | 2022-Jun-14 | EP_18_14571438 | A/common tern/Germany-NI/A03132/2022     | Lebensmittel- und Veterinärinstitut Oldenburg - Standort Veterinärinstitut | Friedrich-Loeffler-Institut           |
| EP213152 | NP | Germany        | 2022-Jun-14 | EP_18_14571438 | A/common tern/Germany-NI/A03132/2022     | Lebensmittel- und Veterinärinstitut Oldenburg - Standort Veterinärinstitut | Friedrich-Loeffler-Institut           |
| EP213153 | NS | Germany        | 2022-Jun-14 | EP_18_14571438 | A/common tern/Germany-NI/A03132/2022     | Lebensmittel- und Veterinärinstitut Oldenburg - Standort Veterinärinstitut | Friedrich-Loeffler-Institut           |
| EP213198 | MP | Germany        | 2022-May-03 | EP_18_14571448 | A/great cormorant/Germany-MV/A02066/2022 | Landesamt für Landwirtschaft, Lebensmittelsicherheit und Fischerei (LALF)  | Friedrich-Loeffler-Institut           |
| EP213199 | NP | Germany        | 2022-May-03 | EP_18_14571448 | A/great cormorant/Germany-MV/A02066/2022 | Landesamt für Landwirtschaft, Lebensmittelsicherheit und Fischerei (LALF)  | Friedrich-Loeffler-Institut           |
| EP213201 | NS | Germany        | 2022-May-03 | EP_18_14571448 | A/great cormorant/Germany-MV/A02066/2022 | Landesamt für Landwirtschaft, Lebensmittelsicherheit und Fischerei (LALF)  | Friedrich-Loeffler-Institut           |
| EP213208 | NP | Germany        | 2022-May-06 | EP_18_14571449 | A/great cormorant/Germany-MV/A02774/2022 | Landesamt für Landwirtschaft, Lebensmittelsicherheit und Fischerei (LALF)  | Friedrich-Loeffler-Institut           |
| EP213206 | MP | Germany        | 2022-May-06 | EP_18_14571449 | A/great cormorant/Germany-MV/A02774/2022 | Landesamt für Landwirtschaft, Lebensmittelsicherheit und Fischerei (LALF)  | Friedrich-Loeffler-Institut           |
| EP213209 | NS | Germany        | 2022-May-06 | EP_18_14571449 | A/great cormorant/Germany-MV/A02774/2022 | Landesamt für Landwirtschaft, Lebensmittelsicherheit und Fischerei (LALF)  | Friedrich-Loeffler-Institut           |
| EP213255 | NS | Germany        | 2022-Jun-16 | EP_18_14573001 | A/northern grebe/Germany-SH/A03490/2022  | Landeslabor Schleswig-Holstein                                             | Friedrich-Loeffler-Institut           |
| EP213254 | NP | Germany        | 2022-Jun-16 | EP_18_14573001 | A/northern grebe/Germany-SH/A03490/2022  | Landeslabor Schleswig-Holstein                                             | Friedrich-Loeffler-Institut           |
| EP213251 | MP | Germany        | 2022-Jun-16 | EP_18_14573001 | A/northern grebe/Germany-SH/A03490/2022  | Landeslabor Schleswig-Holstein                                             | Friedrich-Loeffler-Institut           |
| EP213250 | NS | Germany        | 2022-Jun-15 | EP_18_14573031 | A/northern grebe/Germany-SH/A03490/2022  | Landeslabor Schleswig-Holstein                                             | Friedrich-Loeffler-Institut           |
| EP213265 | MP | Germany        | 2022-Jun-15 | EP_18_14573031 | A/northern grebe/Germany-SH/A03490/2022  | Landeslabor Schleswig-Holstein                                             | Friedrich-Loeffler-Institut           |
| EP213268 | NP | Germany        | 2022-Jun-15 | EP_18_14573031 | A/northern grebe/Germany-SH/A03490/2022  | Landeslabor Schleswig-Holstein                                             | Friedrich-Loeffler-Institut           |
| EP213263 | NP | Germany        | 2022-May-31 | EP_18_14573037 | A/handwich tern/Germany-MV/A03131/2022   | Landesamt für Landwirtschaft, Lebensmittelsicherheit und Fischerei (LALF)  | Friedrich-Loeffler-Institut           |
| EP213261 | NS | Germany        | 2022-May-31 | EP_18_14573037 | A/handwich tern/Germany-MV/A03131/2022   | Landesamt für Landwirtschaft, Lebensmittelsicherheit und Fischerei (LALF)  | Friedrich-Loeffler-Institut           |



|            |    |                |             |                |                                                           |                                                                            |                                                                |
|------------|----|----------------|-------------|----------------|-----------------------------------------------------------|----------------------------------------------------------------------------|----------------------------------------------------------------|
| EP1212608  | MP | Germany        | 2022-May-31 | EP_1S_14573037 | A/handwich/tern/Germany/MP/A031311/2022                   | Landesamt für Landwirtschaft, Lebensmittelsicherheit und Fischerei (LALF)  | Friedrich-Loeffler-Institut                                    |
| EP1212621  | NS | Germany        | 2022-Jun-02 | EP_1S_14573043 | A/handwich/tern/Germany/NE/A031380/2022                   | Lebensmittel- und Veterinärinstitut Oldenburg - Standort Veterinärinstitut | Friedrich-Loeffler-Institut                                    |
| EP1212617  | MP | Germany        | 2022-Jun-02 | EP_1S_14573043 | A/handwich/tern/Germany/NE/A031380/2022                   | Lebensmittel- und Veterinärinstitut Oldenburg - Standort Veterinärinstitut | Friedrich-Loeffler-Institut                                    |
| EP1212619  | NP | Germany        | 2022-Jun-02 | EP_1S_14573043 | A/handwich/tern/Germany/NE/A031380/2022                   | Lebensmittel- und Veterinärinstitut Oldenburg - Standort Veterinärinstitut | Friedrich-Loeffler-Institut                                    |
| EP1212633  | NS | Germany        | 2022-Jun-02 | EP_1S_14573044 | A/handwich/tern/Germany/NE/A031381/2022                   | Lebensmittel- und Veterinärinstitut Oldenburg - Standort Veterinärinstitut | Friedrich-Loeffler-Institut                                    |
| EP1212629  | MP | Germany        | 2022-Jun-02 | EP_1S_14573044 | A/handwich/tern/Germany/NE/A031381/2022                   | Lebensmittel- und Veterinärinstitut Oldenburg - Standort Veterinärinstitut | Friedrich-Loeffler-Institut                                    |
| EP1212632  | NP | Germany        | 2022-Jun-02 | EP_1S_14573044 | A/handwich/tern/Germany/NE/A031381/2022                   | Lebensmittel- und Veterinärinstitut Oldenburg - Standort Veterinärinstitut | Friedrich-Loeffler-Institut                                    |
| EP1212640  | MP | Germany        | 2022-Jun-07 | EP_1S_14573045 | A/handwich/tern/Germany/SW/A03331/2022                    | Landelabor Schleswig-Holstein                                              | Friedrich-Loeffler-Institut                                    |
| EP1212642  | NP | Germany        | 2022-Jun-07 | EP_1S_14573045 | A/handwich/tern/Germany/SW/A03331/2022                    | Landelabor Schleswig-Holstein                                              | Friedrich-Loeffler-Institut                                    |
| EP1212643  | NS | Germany        | 2022-Jun-07 | EP_1S_14573045 | A/handwich/tern/Germany/SW/A03331/2022                    | Landelabor Schleswig-Holstein                                              | Friedrich-Loeffler-Institut                                    |
| EP1212648  | MP | Germany        | 2022-Jun-07 | EP_1S_14573052 | A/handwich/tern/Germany/SW/A03335/2022                    | Landelabor Schleswig-Holstein                                              | Friedrich-Loeffler-Institut                                    |
| EP1212651  | NP | Germany        | 2022-Jun-07 | EP_1S_14573052 | A/handwich/tern/Germany/SW/A03335/2022                    | Landelabor Schleswig-Holstein                                              | Friedrich-Loeffler-Institut                                    |
| EP1212652  | NS | Germany        | 2022-Jun-07 | EP_1S_14573052 | A/handwich/tern/Germany/SW/A03335/2022                    | Landelabor Schleswig-Holstein                                              | Friedrich-Loeffler-Institut                                    |
| EP1212662  | MP | Germany        | 2022-Jun-09 | EP_1S_14573054 | A/handwich/tern/Germany/SW/A03497/2022                    | Landelabor Schleswig-Holstein                                              | Friedrich-Loeffler-Institut                                    |
| EP1212665  | NP | Germany        | 2022-Jun-09 | EP_1S_14573054 | A/handwich/tern/Germany/SW/A03497/2022                    | Landelabor Schleswig-Holstein                                              | Friedrich-Loeffler-Institut                                    |
| EP1212666  | NS | Germany        | 2022-Jun-09 | EP_1S_14573054 | A/handwich/tern/Germany/SW/A03497/2022                    | Landelabor Schleswig-Holstein                                              | Friedrich-Loeffler-Institut                                    |
| EP1214673  | NS | France         | 2022-Jul-13 | EP_1S_14702899 | A/northern_garret/france/Z2P059331/2022                   | Anses (Poufuges-Rouzans)                                                   | ANSES Agence Nationale De Securite Sanitaire De L'alimentation |
| EP1214672  | MP | France         | 2022-Jul-13 | EP_1S_14702899 | A/northern_garret/france/Z2P059332/2022                   | Anses (Poufuges-Rouzans)                                                   | ANSES Agence Nationale De Securite Sanitaire De L'alimentation |
| EP1214670  | NP | France         | 2022-Jul-13 | EP_1S_14702899 | A/northern_garret/france/Z2P059331/2022                   | Anses (Poufuges-Rouzans)                                                   | ANSES Agence Nationale De Securite Sanitaire De L'alimentation |
| EP1218048  | NP | France         | 2022-May-09 | EP_1S_14722960 | A/culture/france/Z2P018218/2022                           | Anses (Poufuges-Rouzans)                                                   | ANSES Agence Nationale De Securite Sanitaire De L'alimentation |
| EP1218050  | MP | France         | 2022-May-09 | EP_1S_14722960 | A/culture/france/Z2P018218/2022                           | Anses (Poufuges-Rouzans)                                                   | ANSES Agence Nationale De Securite Sanitaire De L'alimentation |
| EP1218051  | NS | France         | 2022-May-09 | EP_1S_14722960 | A/culture/france/Z2P018218/2022                           | Anses (Poufuges-Rouzans)                                                   | ANSES Agence Nationale De Securite Sanitaire De L'alimentation |
| EP12150638 | NS | Sweden         | 2022-Jun-29 | EP_1S_14810369 | A/parpatew/sweden/SVA220712020367/8/8002184/Q-2022        | National Veterinary Institute, SVA                                         | National Veterinary Institute                                  |
| EP12150625 | NP | Sweden         | 2022-Jun-29 | EP_1S_14810369 | A/parpatew/sweden/SVA220712020367/8/8002184/Q-2022        | National Veterinary Institute, SVA                                         | National Veterinary Institute                                  |
| EP12150627 | MP | Sweden         | 2022-Jun-29 | EP_1S_14810369 | A/parpatew/sweden/SVA220712020367/8/8002184/Q-2022        | National Veterinary Institute, SVA                                         | National Veterinary Institute                                  |
| EP12150605 | MP | Sweden         | 2022-Jun-20 | EP_1S_14811896 | A/northern_garret/sweden/SVA220623020232/8/8001982/O-2022 | National Veterinary Institute, SVA                                         | National Veterinary Institute                                  |
| EP12150606 | NS | Sweden         | 2022-Jun-20 | EP_1S_14811896 | A/northern_garret/sweden/SVA220623020232/8/8001982/O-2022 | National Veterinary Institute, SVA                                         | National Veterinary Institute                                  |
| EP12150603 | NP | Sweden         | 2022-Jun-20 | EP_1S_14811896 | A/northern_garret/sweden/SVA220623020232/8/8001982/O-2022 | National Veterinary Institute, SVA                                         | National Veterinary Institute                                  |
| EP12150671 | NP | Sweden         | 2022-Jun-15 | EP_1S_14811929 | A/northern_garret/sweden/SVA220623020232/8/8001984/N-2022 | National Veterinary Institute, SVA                                         | National Veterinary Institute                                  |
| EP12150673 | MP | Sweden         | 2022-Jun-15 | EP_1S_14811929 | A/northern_garret/sweden/SVA220623020232/8/8001984/N-2022 | National Veterinary Institute, SVA                                         | National Veterinary Institute                                  |
| EP12150674 | NS | Sweden         | 2022-Jun-15 | EP_1S_14811929 | A/northern_garret/sweden/SVA220623020232/8/8001984/N-2022 | National Veterinary Institute, SVA                                         | National Veterinary Institute                                  |
| EP12154997 | MP | France         | 2022-Jul-08 | EP_1S_14841913 | A/mallard/z2P059377/france/2022                           | Anses (Poufuges-Rouzans)                                                   | ANSES Agence Nationale De Securite Sanitaire De L'alimentation |
| EP12154998 | NS | France         | 2022-Jul-08 | EP_1S_14841913 | A/mallard/z2P059377/france/2022                           | Anses (Poufuges-Rouzans)                                                   | ANSES Agence Nationale De Securite Sanitaire De L'alimentation |
| EP12154995 | NP | France         | 2022-Jul-08 | EP_1S_14841913 | A/mallard/z2P059377/france/2022                           | Anses (Poufuges-Rouzans)                                                   | ANSES Agence Nationale De Securite Sanitaire De L'alimentation |
| EP12158609 | NP | United Kingdom | 2022-Mar-09 | EP_1S_14864638 | A/fin/ireland/M0083-03-23/2022                            | Animal and Plant Health Agency (APHA)                                      | Animal and Plant Health Agency (APHA)                          |

|           |    |                |             |                |                                      |                                                          |                                                                |                            |
|-----------|----|----------------|-------------|----------------|--------------------------------------|----------------------------------------------------------|----------------------------------------------------------------|----------------------------|
| EP1215810 | NS | United Kingdom | 2022-Mar-09 | EP_15_14864638 | A/fine/England/M0081-03-22/2022      | Animal and Plant Health Agency (APHA)                    | Animal and Plant Health Agency (APHA)                          |                            |
| EP1215811 | MP | United Kingdom | 2022-Mar-09 | EP_15_14864638 | A/fine/England/M0081-03-22/2022      | Animal and Plant Health Agency (APHA)                    | Animal and Plant Health Agency (APHA)                          |                            |
| EP1215813 | NP | United Kingdom | 2022-Jan-01 | EP_15_14864641 | A/letter/Scotland/M100839/2022       | Animal and Plant Health Agency (APHA)                    | Animal and Plant Health Agency (APHA)                          |                            |
| EP1215814 | NS | United Kingdom | 2022-Jan-01 | EP_15_14864641 | A/letter/Scotland/M100839/2022       | Animal and Plant Health Agency (APHA)                    | Animal and Plant Health Agency (APHA)                          |                            |
| EP1215815 | MP | United Kingdom | 2022-Jan-01 | EP_15_14864641 | A/letter/Scotland/M100839/2022       | Animal and Plant Health Agency (APHA)                    | Animal and Plant Health Agency (APHA)                          |                            |
| EP1215841 | NP | United Kingdom | 2022-Jan-01 | EP_15_14864642 | A/letter/Scotland/M100366/2022       | Animal and Plant Health Agency (APHA)                    | Animal and Plant Health Agency (APHA)                          |                            |
| EP1215842 | NS | United Kingdom | 2022-Jan-01 | EP_15_14864642 | A/letter/Scotland/M100366/2022       | Animal and Plant Health Agency (APHA)                    | Animal and Plant Health Agency (APHA)                          |                            |
| EP1215843 | MP | United Kingdom | 2022-Jan-01 | EP_15_14864642 | A/letter/Scotland/M100366/2022       | Animal and Plant Health Agency (APHA)                    | Animal and Plant Health Agency (APHA)                          |                            |
| EP1215870 | NP | United Kingdom | 2022-Aug-26 | EP_15_14864650 | A/hurley/England/111013/2022         | Animal and Plant Health Agency (APHA)                    | Animal and Plant Health Agency (APHA)                          |                            |
| EP1215876 | NS | United Kingdom | 2022-Aug-26 | EP_15_14864650 | A/hurley/England/111013/2022         | Animal and Plant Health Agency (APHA)                    | Animal and Plant Health Agency (APHA)                          |                            |
| EP1215877 | MP | United Kingdom | 2022-Aug-26 | EP_15_14864650 | A/hurley/England/111013/2022         | Animal and Plant Health Agency (APHA)                    | Animal and Plant Health Agency (APHA)                          |                            |
| EP1215871 | NP | United Kingdom | 2022-Feb-01 | EP_15_14864652 | A/hung-uked_ukaa/Scotland/22/2022    | Animal and Plant Health Agency (APHA)                    | Animal and Plant Health Agency (APHA)                          |                            |
| EP1215872 | NS | United Kingdom | 2022-Feb-01 | EP_15_14864652 | A/hung-uked_ukaa/Scotland/22/2022    | Animal and Plant Health Agency (APHA)                    | Animal and Plant Health Agency (APHA)                          |                            |
| EP1215873 | MP | United Kingdom | 2022-Feb-01 | EP_15_14864652 | A/hung-uked_ukaa/Scotland/22/2022    | Animal and Plant Health Agency (APHA)                    | Animal and Plant Health Agency (APHA)                          |                            |
| EP1215712 | NP | Poland         | 2022-Jul-13 | EP_15_14917968 | A/common_muru/Poland/M8151/2022      | National Veterinary Research Institute Poland, PiWiP-PiB | National Veterinary Research Institute Poland, PiWiP-PiB       | Sawtort E., Srejszanska K. |
| EP1215717 | NS | Poland         | 2022-Jul-13 | EP_15_14917968 | A/common_muru/Poland/M8151/2022      | National Veterinary Research Institute Poland, PiWiP-PiB | National Veterinary Research Institute Poland, PiWiP-PiB       | Sawtort E., Srejszanska K. |
| EP1215715 | MP | Poland         | 2022-Jul-13 | EP_15_14917968 | A/common_muru/Poland/M8151/2022      | National Veterinary Research Institute Poland, PiWiP-PiB | National Veterinary Research Institute Poland, PiWiP-PiB       | Sawtort E., Srejszanska K. |
| EP1215713 | NS | Poland         | 2022-May-30 | EP_15_14917979 | A/herring_gul/Poland/M8138/2022      | National Veterinary Research Institute Poland, PiWiP-PiB | National Veterinary Research Institute Poland, PiWiP-PiB       | Sawtort E., Srejszanska K. |
| EP1215720 | NP | Poland         | 2022-May-30 | EP_15_14917979 | A/herring_gul/Poland/M8138/2022      | National Veterinary Research Institute Poland, PiWiP-PiB | National Veterinary Research Institute Poland, PiWiP-PiB       | Sawtort E., Srejszanska K. |
| EP1215723 | MP | Poland         | 2022-May-30 | EP_15_14917979 | A/herring_gul/Poland/M8138/2022      | National Veterinary Research Institute Poland, PiWiP-PiB | National Veterinary Research Institute Poland, PiWiP-PiB       | Sawtort E., Srejszanska K. |
| EP1215713 | NS | Poland         | 2022-May-30 | EP_15_14917999 | A/black-headed_gul/Poland/M8139/2022 | National Veterinary Research Institute Poland, PiWiP-PiB | National Veterinary Research Institute Poland, PiWiP-PiB       | Sawtort E., Srejszanska K. |
| EP1215728 | NP | Poland         | 2022-May-30 | EP_15_14917999 | A/black-headed_gul/Poland/M8139/2022 | National Veterinary Research Institute Poland, PiWiP-PiB | National Veterinary Research Institute Poland, PiWiP-PiB       | Sawtort E., Srejszanska K. |
| EP1215731 | MP | Poland         | 2022-May-30 | EP_15_14917999 | A/black-headed_gul/Poland/M8139/2022 | National Veterinary Research Institute Poland, PiWiP-PiB | National Veterinary Research Institute Poland, PiWiP-PiB       | Sawtort E., Srejszanska K. |
| EP1217611 | MP | France         | 2022-Aug-24 | EP_15_14933724 | A/black/france/22P020165/2022        | Anses (Pouflegan-Friseaux)                               | ANSES Agence Nationale De Securite Sanitaire De L'alimentation |                            |
| EP1217613 | NS | France         | 2022-Aug-24 | EP_15_14933724 | A/black/france/22P020165/2022        | Anses (Pouflegan-Friseaux)                               | ANSES Agence Nationale De Securite Sanitaire De L'alimentation |                            |
| EP1217608 | NP | France         | 2022-Aug-24 | EP_15_14933724 | A/black/france/22P020165/2022        | Anses (Pouflegan-Friseaux)                               | ANSES Agence Nationale De Securite Sanitaire De L'alimentation |                            |
| EP1218199 | MP | United Kingdom | 2022-Sep-05 | EP_15_15038818 | A/pheasant/England/115111/2022       | Animal and Plant Health Agency (APHA)                    | Animal and Plant Health Agency (APHA)                          |                            |
| EP1218197 | NP | United Kingdom | 2022-Sep-05 | EP_15_15038818 | A/pheasant/England/115111/2022       | Animal and Plant Health Agency (APHA)                    | Animal and Plant Health Agency (APHA)                          |                            |
| EP1218198 | NS | United Kingdom | 2022-Sep-05 | EP_15_15038818 | A/pheasant/England/115111/2022       | Animal and Plant Health Agency (APHA)                    | Animal and Plant Health Agency (APHA)                          |                            |
| EP1218195 | NP | United Kingdom | 2022-Sep-05 | EP_15_15038819 | A/parridge/England/115171/2022       | Animal and Plant Health Agency (APHA)                    | Animal and Plant Health Agency (APHA)                          |                            |
| EP1218197 | MP | United Kingdom | 2022-Sep-05 | EP_15_15038819 | A/parridge/England/115171/2022       | Animal and Plant Health Agency (APHA)                    | Animal and Plant Health Agency (APHA)                          |                            |
| EP1218196 | NS | United Kingdom | 2022-Sep-05 | EP_15_15038819 | A/parridge/England/115171/2022       | Animal and Plant Health Agency (APHA)                    | Animal and Plant Health Agency (APHA)                          |                            |
| EP1218113 | NP | United Kingdom | 2022-Sep-05 | EP_15_15038820 | A/chicken/England/115126/2022        | Animal and Plant Health Agency (APHA)                    | Animal and Plant Health Agency (APHA)                          |                            |
| EP1218114 | NS | United Kingdom | 2022-Sep-05 | EP_15_15038820 | A/chicken/England/115126/2022        | Animal and Plant Health Agency (APHA)                    | Animal and Plant Health Agency (APHA)                          |                            |
| EP1218115 | MP | United Kingdom | 2022-Sep-05 | EP_15_15038820 | A/chicken/England/115126/2022        | Animal and Plant Health Agency (APHA)                    | Animal and Plant Health Agency (APHA)                          |                            |

|           |    |                |             |                |                                             |                                       |                                       |
|-----------|----|----------------|-------------|----------------|---------------------------------------------|---------------------------------------|---------------------------------------|
| EP1218130 | NS | United Kingdom | 2022-Sep-02 | EP_10_15088822 | A/Chicken/England/1445/9/2022               | Animal and Plant Health Agency (APHA) | Animal and Plant Health Agency (APHA) |
| EP1218131 | MP | United Kingdom | 2022-Sep-02 | EP_10_15088822 | A/Chicken/England/1445/9/2022               | Animal and Plant Health Agency (APHA) | Animal and Plant Health Agency (APHA) |
| EP1218132 | NP | United Kingdom | 2022-Sep-02 | EP_10_15088822 | A/Chicken/England/1445/9/2022               | Animal and Plant Health Agency (APHA) | Animal and Plant Health Agency (APHA) |
| EP1218177 | NP | Netherlands    | 2022-Aug-10 | EP_10_15089398 | A/European Herring Gull/Netherlands/12/2022 | Erasmus Medical Center                | Erasmus Medical Center                |
| EP1218178 | NS | Netherlands    | 2022-Aug-10 | EP_10_15089398 | A/European Herring Gull/Netherlands/12/2022 | Erasmus Medical Center                | Erasmus Medical Center                |
| EP1218179 | MP | Netherlands    | 2022-Aug-10 | EP_10_15089398 | A/European Herring Gull/Netherlands/12/2022 | Erasmus Medical Center                | Erasmus Medical Center                |
| EP1218190 | NP | Netherlands    | 2022-Aug-10 | EP_10_15089399 | A/Black-headed gull/Netherlands/10/2022     | Erasmus Medical Center                | Erasmus Medical Center                |
| EP1218196 | NS | Netherlands    | 2022-Aug-10 | EP_10_15089399 | A/Black-headed gull/Netherlands/10/2022     | Erasmus Medical Center                | Erasmus Medical Center                |
| EP1218197 | MP | Netherlands    | 2022-Aug-10 | EP_10_15089399 | A/Black-headed gull/Netherlands/10/2022     | Erasmus Medical Center                | Erasmus Medical Center                |
| EP1218173 | NP | Netherlands    | 2022-Aug-10 | EP_10_15089400 | A/Mute Swan/Netherlands/1/2022              | Erasmus Medical Center                | Erasmus Medical Center                |
| EP1218174 | NS | Netherlands    | 2022-Aug-10 | EP_10_15089400 | A/Mute Swan/Netherlands/1/2022              | Erasmus Medical Center                | Erasmus Medical Center                |
| EP1218175 | MP | Netherlands    | 2022-Aug-10 | EP_10_15089400 | A/Mute Swan/Netherlands/1/2022              | Erasmus Medical Center                | Erasmus Medical Center                |
| EP1218181 | NP | Netherlands    | 2022-Aug-12 | EP_10_15089401 | A/Common Tern/Netherlands/26/2022           | Erasmus Medical Center                | Erasmus Medical Center                |
| EP1218182 | NS | Netherlands    | 2022-Aug-12 | EP_10_15089401 | A/Common Tern/Netherlands/26/2022           | Erasmus Medical Center                | Erasmus Medical Center                |
| EP1218183 | MP | Netherlands    | 2022-Aug-12 | EP_10_15089401 | A/Common Tern/Netherlands/26/2022           | Erasmus Medical Center                | Erasmus Medical Center                |
| EP1218145 | NP | Netherlands    | 2022-Aug-17 | EP_10_15088295 | A/Common Buzzard/Netherlands/1/2022         | Erasmus Medical Center                | Erasmus Medical Center                |
| EP1218146 | NS | Netherlands    | 2022-Aug-17 | EP_10_15088295 | A/Common Buzzard/Netherlands/1/2022         | Erasmus Medical Center                | Erasmus Medical Center                |
| EP1218147 | MP | Netherlands    | 2022-Aug-17 | EP_10_15088295 | A/Common Buzzard/Netherlands/1/2022         | Erasmus Medical Center                | Erasmus Medical Center                |
| EP1218153 | NP | Netherlands    | 2022-Aug-19 | EP_10_15088296 | A/European Herring Gull/Netherlands/13/2022 | Erasmus Medical Center                | Erasmus Medical Center                |
| EP1218154 | NS | Netherlands    | 2022-Aug-19 | EP_10_15088296 | A/European Herring Gull/Netherlands/13/2022 | Erasmus Medical Center                | Erasmus Medical Center                |
| EP1218155 | MP | Netherlands    | 2022-Aug-19 | EP_10_15088296 | A/European Herring Gull/Netherlands/13/2022 | Erasmus Medical Center                | Erasmus Medical Center                |
| EP1218161 | NP | Netherlands    | 2022-Aug-21 | EP_10_15088297 | A/European Herring Gull/Netherlands/14/2022 | Erasmus Medical Center                | Erasmus Medical Center                |
| EP1218162 | NS | Netherlands    | 2022-Aug-21 | EP_10_15088297 | A/European Herring Gull/Netherlands/14/2022 | Erasmus Medical Center                | Erasmus Medical Center                |
| EP1218163 | MP | Netherlands    | 2022-Aug-21 | EP_10_15088297 | A/European Herring Gull/Netherlands/14/2022 | Erasmus Medical Center                | Erasmus Medical Center                |
| EP1218169 | NP | Netherlands    | 2022-Aug-21 | EP_10_15088298 | A/Northern Gannet/Netherlands/1/2022        | Erasmus Medical Center                | Erasmus Medical Center                |
| EP1218170 | NS | Netherlands    | 2022-Aug-21 | EP_10_15088298 | A/Northern Gannet/Netherlands/1/2022        | Erasmus Medical Center                | Erasmus Medical Center                |
| EP1218171 | MP | Netherlands    | 2022-Aug-21 | EP_10_15088298 | A/Northern Gannet/Netherlands/1/2022        | Erasmus Medical Center                | Erasmus Medical Center                |
| EP1218177 | NP | Netherlands    | 2022-Aug-26 | EP_10_15088299 | A/Graylag Goose/Netherlands/10/2022         | Erasmus Medical Center                | Erasmus Medical Center                |
| EP1218178 | NS | Netherlands    | 2022-Aug-26 | EP_10_15088299 | A/Graylag Goose/Netherlands/10/2022         | Erasmus Medical Center                | Erasmus Medical Center                |
| EP1218179 | MP | Netherlands    | 2022-Aug-26 | EP_10_15088299 | A/Graylag Goose/Netherlands/10/2022         | Erasmus Medical Center                | Erasmus Medical Center                |
| EP1218185 | NP | Netherlands    | 2022-Aug-26 | EP_10_15088300 | A/Graylag Goose/Netherlands/11/2022         | Erasmus Medical Center                | Erasmus Medical Center                |
| EP1218186 | NS | Netherlands    | 2022-Aug-26 | EP_10_15088300 | A/Graylag Goose/Netherlands/11/2022         | Erasmus Medical Center                | Erasmus Medical Center                |
| EP1218187 | MP | Netherlands    | 2022-Aug-26 | EP_10_15088300 | A/Graylag Goose/Netherlands/11/2022         | Erasmus Medical Center                | Erasmus Medical Center                |
| EP1218193 | NP | Netherlands    | 2022-Aug-26 | EP_10_15088301 | A/Graylag Goose/Netherlands/12/2022         | Erasmus Medical Center                | Erasmus Medical Center                |
| EP1218194 | NS | Netherlands    | 2022-Aug-26 | EP_10_15088301 | A/Graylag Goose/Netherlands/12/2022         | Erasmus Medical Center                | Erasmus Medical Center                |

|            |    |                |             |                |                                               |                                       |                                       |
|------------|----|----------------|-------------|----------------|-----------------------------------------------|---------------------------------------|---------------------------------------|
| EP1218535  | MP | Netherlands    | 2022-Aug-26 | EP_10_1508B301 | A/Greylag Goose/Netherlands/12/2022           | Erasmus Medical Center                | Erasmus Medical Center                |
| EP1218540  | NP | Netherlands    | 2022-Aug-27 | EP_10_1508B302 | A/Greylag Goose/Netherlands/13/2022           | Erasmus Medical Center                | Erasmus Medical Center                |
| EP1218541  | NS | Netherlands    | 2022-Aug-27 | EP_10_1508B302 | A/Greylag Goose/Netherlands/13/2022           | Erasmus Medical Center                | Erasmus Medical Center                |
| EP1218542  | MP | Netherlands    | 2022-Aug-27 | EP_10_1508B302 | A/Greylag Goose/Netherlands/13/2022           | Erasmus Medical Center                | Erasmus Medical Center                |
| EP1218548  | NP | Netherlands    | 2022-Aug-29 | EP_10_1508B303 | A/Lesser Black backed Gull/Netherlands/3/2022 | Erasmus Medical Center                | Erasmus Medical Center                |
| EP1218549  | NS | Netherlands    | 2022-Aug-29 | EP_10_1508B303 | A/Lesser Black backed Gull/Netherlands/3/2022 | Erasmus Medical Center                | Erasmus Medical Center                |
| EP12185410 | MP | Netherlands    | 2022-Aug-29 | EP_10_1508B303 | A/Lesser Black backed Gull/Netherlands/3/2022 | Erasmus Medical Center                | Erasmus Medical Center                |
| EP12185416 | NP | Netherlands    | 2022-Aug-29 | EP_10_1508B304 | A/European Herring Gull/Netherlands/25/2022   | Erasmus Medical Center                | Erasmus Medical Center                |
| EP12185417 | NS | Netherlands    | 2022-Aug-29 | EP_10_1508B304 | A/European Herring Gull/Netherlands/25/2022   | Erasmus Medical Center                | Erasmus Medical Center                |
| EP12185418 | MP | Netherlands    | 2022-Aug-29 | EP_10_1508B304 | A/European Herring Gull/Netherlands/25/2022   | Erasmus Medical Center                | Erasmus Medical Center                |
| EP12185424 | NP | Netherlands    | 2022-Aug-29 | EP_10_1508B305 | A/Common Teal/Netherlands/12/2022             | Erasmus Medical Center                | Erasmus Medical Center                |
| EP12185425 | NS | Netherlands    | 2022-Aug-29 | EP_10_1508B305 | A/Common Teal/Netherlands/12/2022             | Erasmus Medical Center                | Erasmus Medical Center                |
| EP12185426 | MP | Netherlands    | 2022-Aug-29 | EP_10_1508B305 | A/Common Teal/Netherlands/12/2022             | Erasmus Medical Center                | Erasmus Medical Center                |
| EP12185432 | NP | Netherlands    | 2022-Aug-18 | EP_10_1508B306 | A/Mallard/Netherlands/1/2022                  | Erasmus Medical Center                | Erasmus Medical Center                |
| EP12185433 | NS | Netherlands    | 2022-Aug-18 | EP_10_1508B306 | A/Mallard/Netherlands/1/2022                  | Erasmus Medical Center                | Erasmus Medical Center                |
| EP12185434 | MP | Netherlands    | 2022-Aug-18 | EP_10_1508B306 | A/Mallard/Netherlands/1/2022                  | Erasmus Medical Center                | Erasmus Medical Center                |
| EP12185446 | NP | Netherlands    | 2022-Aug-21 | EP_10_1508B308 | A/Mallard/Netherlands/2/2022                  | Erasmus Medical Center                | Erasmus Medical Center                |
| EP12185447 | NS | Netherlands    | 2022-Aug-21 | EP_10_1508B308 | A/Mallard/Netherlands/2/2022                  | Erasmus Medical Center                | Erasmus Medical Center                |
| EP12185448 | MP | Netherlands    | 2022-Aug-21 | EP_10_1508B308 | A/Mallard/Netherlands/2/2022                  | Erasmus Medical Center                | Erasmus Medical Center                |
| EP12185453 | NP | Netherlands    | 2022-Aug-24 | EP_10_1508B309 | A/Mallard/Netherlands/6/2022                  | Erasmus Medical Center                | Erasmus Medical Center                |
| EP12185454 | NS | Netherlands    | 2022-Aug-24 | EP_10_1508B309 | A/Mallard/Netherlands/6/2022                  | Erasmus Medical Center                | Erasmus Medical Center                |
| EP12185455 | MP | Netherlands    | 2022-Aug-24 | EP_10_1508B309 | A/Mallard/Netherlands/6/2022                  | Erasmus Medical Center                | Erasmus Medical Center                |
| EP12185484 | MP | United Kingdom | 2022-Aug-26 | EP_10_15115556 | A/Hurley/England/112259/2022                  | Animal and Plant Health Agency (APHA) | Animal and Plant Health Agency (APHA) |
| EP12185482 | NP | United Kingdom | 2022-Aug-26 | EP_10_15115556 | A/Hurley/England/112259/2022                  | Animal and Plant Health Agency (APHA) | Animal and Plant Health Agency (APHA) |
| EP12185486 | NS | United Kingdom | 2022-Aug-26 | EP_10_15115556 | A/Hurley/England/112259/2022                  | Animal and Plant Health Agency (APHA) | Animal and Plant Health Agency (APHA) |
| EP12191362 | NP | Netherlands    | 2022-Sep-04 | EP_10_15287012 | A/Lesser Black backed Gull/Netherlands/4/2022 | Erasmus Medical Center                | Erasmus Medical Center                |
| EP12191363 | NS | Netherlands    | 2022-Sep-04 | EP_10_15287012 | A/Lesser Black backed Gull/Netherlands/4/2022 | Erasmus Medical Center                | Erasmus Medical Center                |
| EP12191364 | MP | Netherlands    | 2022-Sep-04 | EP_10_15287012 | A/Lesser Black backed Gull/Netherlands/4/2022 | Erasmus Medical Center                | Erasmus Medical Center                |
| EP12191370 | NP | Netherlands    | 2022-Jun-16 | EP_10_15287013 | A/Turkuan Spoonbill/Netherlands/2/2022        | Erasmus Medical Center                | Erasmus Medical Center                |
| EP12191371 | NS | Netherlands    | 2022-Jun-16 | EP_10_15287013 | A/Turkuan Spoonbill/Netherlands/2/2022        | Erasmus Medical Center                | Erasmus Medical Center                |
| EP12191372 | MP | Netherlands    | 2022-Jun-16 | EP_10_15287013 | A/Turkuan Spoonbill/Netherlands/2/2022        | Erasmus Medical Center                | Erasmus Medical Center                |
| EP12191378 | NP | Netherlands    | 2022-Jun-16 | EP_10_15287014 | A/Turkuan Spoonbill/Netherlands/6/2022        | Erasmus Medical Center                | Erasmus Medical Center                |
| EP12191379 | NS | Netherlands    | 2022-Jun-16 | EP_10_15287014 | A/Turkuan Spoonbill/Netherlands/6/2022        | Erasmus Medical Center                | Erasmus Medical Center                |
| EP12191380 | MP | Netherlands    | 2022-Jun-16 | EP_10_15287014 | A/Turkuan Spoonbill/Netherlands/6/2022        | Erasmus Medical Center                | Erasmus Medical Center                |
| EP12191386 | NP | Netherlands    | 2022-Jun-16 | EP_10_15287016 | A/Turkuan Spoonbill/Netherlands/7/2022        | Erasmus Medical Center                | Erasmus Medical Center                |



|          |    |             |             |                |                                             |                                                         |                                                         |                                                                                                                                                                                    |
|----------|----|-------------|-------------|----------------|---------------------------------------------|---------------------------------------------------------|---------------------------------------------------------|------------------------------------------------------------------------------------------------------------------------------------------------------------------------------------|
| EP229352 | NP | Netherlands | 2022-Sep-10 | EP_10_15364788 | A/European Herring Gull/Netherlands/17/2022 | Erasmus Medical Center                                  | Erasmus Medical Center                                  |                                                                                                                                                                                    |
| EP229353 | NS | Netherlands | 2022-Sep-10 | EP_10_15364788 | A/European Herring Gull/Netherlands/17/2022 | Erasmus Medical Center                                  | Erasmus Medical Center                                  |                                                                                                                                                                                    |
| EP229354 | MP | Netherlands | 2022-Sep-10 | EP_10_15364788 | A/European Herring Gull/Netherlands/17/2022 | Erasmus Medical Center                                  | Erasmus Medical Center                                  |                                                                                                                                                                                    |
| EP229359 | NP | Netherlands | 2022-Sep-10 | EP_10_15364789 | A/European Herring Gull/Netherlands/18/2022 | Erasmus Medical Center                                  | Erasmus Medical Center                                  |                                                                                                                                                                                    |
| EP229360 | NS | Netherlands | 2022-Sep-10 | EP_10_15364789 | A/European Herring Gull/Netherlands/18/2022 | Erasmus Medical Center                                  | Erasmus Medical Center                                  |                                                                                                                                                                                    |
| EP229361 | MP | Netherlands | 2022-Sep-10 | EP_10_15364789 | A/European Herring Gull/Netherlands/18/2022 | Erasmus Medical Center                                  | Erasmus Medical Center                                  |                                                                                                                                                                                    |
| EP229367 | NP | Netherlands | 2022-Sep-16 | EP_10_15364790 | A/Greyling Gosw/Netherlands/17/2022         | Erasmus Medical Center                                  | Erasmus Medical Center                                  |                                                                                                                                                                                    |
| EP229368 | NS | Netherlands | 2022-Sep-16 | EP_10_15364790 | A/Greyling Gosw/Netherlands/17/2022         | Erasmus Medical Center                                  | Erasmus Medical Center                                  |                                                                                                                                                                                    |
| EP229369 | MP | Netherlands | 2022-Sep-16 | EP_10_15364790 | A/Greyling Gosw/Netherlands/17/2022         | Erasmus Medical Center                                  | Erasmus Medical Center                                  |                                                                                                                                                                                    |
| EP229381 | NP | Netherlands | 2022-Sep-14 | EP_10_15364792 | A/Mallard/Netherlands/11/2022               | Erasmus Medical Center                                  | Erasmus Medical Center                                  |                                                                                                                                                                                    |
| EP229382 | NS | Netherlands | 2022-Sep-14 | EP_10_15364792 | A/Mallard/Netherlands/11/2022               | Erasmus Medical Center                                  | Erasmus Medical Center                                  |                                                                                                                                                                                    |
| EP229383 | MP | Netherlands | 2022-Sep-14 | EP_10_15364792 | A/Mallard/Netherlands/11/2022               | Erasmus Medical Center                                  | Erasmus Medical Center                                  |                                                                                                                                                                                    |
| EP229389 | NP | Netherlands | 2022-Sep-19 | EP_10_15364793 | A/Mallard/Netherlands/12/2022               | Erasmus Medical Center                                  | Erasmus Medical Center                                  |                                                                                                                                                                                    |
| EP229390 | NS | Netherlands | 2022-Sep-19 | EP_10_15364793 | A/Mallard/Netherlands/12/2022               | Erasmus Medical Center                                  | Erasmus Medical Center                                  |                                                                                                                                                                                    |
| EP229391 | MP | Netherlands | 2022-Sep-19 | EP_10_15364793 | A/Mallard/Netherlands/12/2022               | Erasmus Medical Center                                  | Erasmus Medical Center                                  |                                                                                                                                                                                    |
| EP229396 | NP | Netherlands | 2022-Sep-26 | EP_10_15364794 | A/Mallard/Netherlands/13/2022               | Erasmus Medical Center                                  | Erasmus Medical Center                                  |                                                                                                                                                                                    |
| EP229397 | NS | Netherlands | 2022-Sep-26 | EP_10_15364794 | A/Mallard/Netherlands/13/2022               | Erasmus Medical Center                                  | Erasmus Medical Center                                  |                                                                                                                                                                                    |
| EP229398 | MP | Netherlands | 2022-Sep-26 | EP_10_15364794 | A/Mallard/Netherlands/13/2022               | Erasmus Medical Center                                  | Erasmus Medical Center                                  |                                                                                                                                                                                    |
| EP229404 | NP | Netherlands | 2022-Sep-08 | EP_10_15364795 | A/Mallard/Netherlands/9/2022                | Erasmus Medical Center                                  | Erasmus Medical Center                                  |                                                                                                                                                                                    |
| EP229405 | NS | Netherlands | 2022-Sep-08 | EP_10_15364795 | A/Mallard/Netherlands/9/2022                | Erasmus Medical Center                                  | Erasmus Medical Center                                  |                                                                                                                                                                                    |
| EP229406 | MP | Netherlands | 2022-Sep-08 | EP_10_15364795 | A/Mallard/Netherlands/9/2022                | Erasmus Medical Center                                  | Erasmus Medical Center                                  |                                                                                                                                                                                    |
| EP229412 | NP | Netherlands | 2022-Sep-11 | EP_10_15364796 | A/Mallard/Netherlands/9/2022                | Erasmus Medical Center                                  | Erasmus Medical Center                                  |                                                                                                                                                                                    |
| EP229413 | NS | Netherlands | 2022-Sep-11 | EP_10_15364796 | A/Mallard/Netherlands/9/2022                | Erasmus Medical Center                                  | Erasmus Medical Center                                  |                                                                                                                                                                                    |
| EP229414 | MP | Netherlands | 2022-Sep-11 | EP_10_15364796 | A/Mallard/Netherlands/9/2022                | Erasmus Medical Center                                  | Erasmus Medical Center                                  |                                                                                                                                                                                    |
| EP229430 | NP | Netherlands | 2022-Sep-19 | EP_10_15364797 | A/Mute Swan/Netherlands/2/2022              | Erasmus Medical Center                                  | Erasmus Medical Center                                  |                                                                                                                                                                                    |
| EP229431 | NS | Netherlands | 2022-Sep-19 | EP_10_15364797 | A/Mute Swan/Netherlands/2/2022              | Erasmus Medical Center                                  | Erasmus Medical Center                                  |                                                                                                                                                                                    |
| EP229432 | MP | Netherlands | 2022-Sep-19 | EP_10_15364797 | A/Mute Swan/Netherlands/2/2022              | Erasmus Medical Center                                  | Erasmus Medical Center                                  |                                                                                                                                                                                    |
| EP229717 | NP | Finland     | 2022-Feb-01 | EP_10_15182809 | A/Fynn/Finland/W209-22_22V08127-2/2022      | Finnish Food Authority                                  | Istituto Zooprofilattico Sperimentale Della Venezia     | Tammiroanta, N., Kantala, T., Saaranen, I., Gidde, T., Zecchin, B., Puura, A., Schivo, A., Salvia, A., Palumbo, E., Milani, A., Giovanni, E., Pastor, A., Moroni, I., Terragni, C. |
| EP229718 | NS | Finland     | 2022-Feb-01 | EP_10_15182809 | A/Fynn/Finland/W209-22_22V08127-2/2022      | Finnish Food Authority                                  | Istituto Zooprofilattico Sperimentale Della Venezia     | Tammiroanta, N., Kantala, T., Saaranen, I., Gidde, T., Zecchin, B., Puura, A., Schivo, A., Salvia, A., Palumbo, E., Milani, A., Giovanni, E., Pastor, A., Moroni, I., Terragni, C. |
| EP229719 | MP | Finland     | 2022-Feb-01 | EP_10_15182809 | A/Fynn/Finland/W209-22_22V08127-2/2022      | Finnish Food Authority                                  | Istituto Zooprofilattico Sperimentale Della Venezia     | Tammiroanta, N., Kantala, T., Saaranen, I., Gidde, T., Zecchin, B., Puura, A., Schivo, A., Salvia, A., Palumbo, E., Milani, A., Giovanni, E., Pastor, A., Moroni, I., Terragni, C. |
| EP229724 | NS | Poland      | 2022-Sep-20 | EP_10_15155272 | A/Genemstc_gosw/Poland/W097-N/2022          | National Veterinary Research Institut Poland, PIWet-PIB | National Veterinary Research Institut Poland, PIWet-PIB | Sajceni E., Srejszanka K.                                                                                                                                                          |
| EP229730 | NP | Poland      | 2022-Sep-20 | EP_10_15155272 | A/Genemstc_gosw/Poland/W097-N/2022          | National Veterinary Research Institut Poland, PIWet-PIB | National Veterinary Research Institut Poland, PIWet-PIB | Sajceni E., Srejszanka K.                                                                                                                                                          |
| EP229732 | MP | Poland      | 2022-Sep-20 | EP_10_15155272 | A/Genemstc_gosw/Poland/W097-N/2022          | National Veterinary Research Institut Poland, PIWet-PIB | National Veterinary Research Institut Poland, PIWet-PIB | Sajceni E., Srejszanka K.                                                                                                                                                          |
| EP229745 | NP | Spain       | 2022-Sep-23 | EP_10_15542438 | A/CasillalaaMenchu/3739/2022                | Instituto de Salud Carlos III                           | Instituto de Salud Carlos III                           | Perez, F., Iglesias-Caballero, M., Molero, M., Camarero, S., Marín, V., Reyes, N., Viquez-Morales, C., Casas, J.                                                                   |
| EP229746 | NS | Spain       | 2022-Sep-23 | EP_10_15542438 | A/CasillalaaMenchu/3739/2022                | Instituto de Salud Carlos III                           | Instituto de Salud Carlos III                           | Perez, F., Iglesias-Caballero, M., Molero, M., Camarero, S., Marín, V., Reyes, N., Viquez-Morales, C., Casas, J.                                                                   |

|           |    |             |             |                |                                             |                               |                               |                                                                                                     |
|-----------|----|-------------|-------------|----------------|---------------------------------------------|-------------------------------|-------------------------------|-----------------------------------------------------------------------------------------------------|
| EP2292712 | MP | Spain       | 2022-Sep-21 | EP_10_15542438 | A/Castilla-La Mancha/3739/2022              | Instituto de Salud Carlos III | Instituto de Salud Carlos III | Perez F, Iglesias-Caballero M, Molinero M, Camarero S, Merino V, Reyes N, Yaguez-Morales C, Casas A |
| EP2297787 | NP | Netherlands | 2022-Sep-21 | EP_10_15579535 | A/European Herring Gull/Netherlands/20/2022 | Erasmus Medical Center        | Erasmus Medical Center        |                                                                                                     |
| EP2297788 | NS | Netherlands | 2022-Sep-21 | EP_10_15579535 | A/European Herring Gull/Netherlands/20/2022 | Erasmus Medical Center        | Erasmus Medical Center        |                                                                                                     |
| EP2297789 | MP | Netherlands | 2022-Sep-21 | EP_10_15579535 | A/European Herring Gull/Netherlands/20/2022 | Erasmus Medical Center        | Erasmus Medical Center        |                                                                                                     |
| EP2297795 | NP | Netherlands | 2022-Sep-25 | EP_10_15579536 | A/Greylag Goose/Netherlands/18/2022         | Erasmus Medical Center        | Erasmus Medical Center        |                                                                                                     |
| EP2297796 | NS | Netherlands | 2022-Sep-25 | EP_10_15579536 | A/Greylag Goose/Netherlands/18/2022         | Erasmus Medical Center        | Erasmus Medical Center        |                                                                                                     |
| EP2297797 | MP | Netherlands | 2022-Sep-25 | EP_10_15579536 | A/Greylag Goose/Netherlands/18/2022         | Erasmus Medical Center        | Erasmus Medical Center        |                                                                                                     |
| EP2297802 | NP | Netherlands | 2022-Sep-26 | EP_10_15579537 | A/Barnacle Goose/Netherlands/19/2022        | Erasmus Medical Center        | Erasmus Medical Center        |                                                                                                     |
| EP2297803 | NS | Netherlands | 2022-Sep-26 | EP_10_15579537 | A/Barnacle Goose/Netherlands/19/2022        | Erasmus Medical Center        | Erasmus Medical Center        |                                                                                                     |
| EP2297804 | MP | Netherlands | 2022-Sep-26 | EP_10_15579537 | A/Barnacle Goose/Netherlands/19/2022        | Erasmus Medical Center        | Erasmus Medical Center        |                                                                                                     |
| EP2297810 | NP | Netherlands | 2022-Sep-28 | EP_10_15579538 | A/Turkmen Curlew/Netherlands/4/2022         | Erasmus Medical Center        | Erasmus Medical Center        |                                                                                                     |
| EP2297811 | NS | Netherlands | 2022-Sep-28 | EP_10_15579538 | A/Turkmen Curlew/Netherlands/4/2022         | Erasmus Medical Center        | Erasmus Medical Center        |                                                                                                     |
| EP2297812 | MP | Netherlands | 2022-Sep-28 | EP_10_15579538 | A/Turkmen Curlew/Netherlands/4/2022         | Erasmus Medical Center        | Erasmus Medical Center        |                                                                                                     |
| EP2297818 | NP | Netherlands | 2022-Oct-02 | EP_10_15579539 | A/European Herring Gull/Netherlands/20/2022 | Erasmus Medical Center        | Erasmus Medical Center        |                                                                                                     |
| EP2297819 | NS | Netherlands | 2022-Oct-02 | EP_10_15579539 | A/European Herring Gull/Netherlands/20/2022 | Erasmus Medical Center        | Erasmus Medical Center        |                                                                                                     |
| EP2297820 | MP | Netherlands | 2022-Oct-02 | EP_10_15579539 | A/European Herring Gull/Netherlands/20/2022 | Erasmus Medical Center        | Erasmus Medical Center        |                                                                                                     |
| EP2297826 | NP | Netherlands | 2022-Sep-21 | EP_10_15579540 | A/Mallard/Netherlands/15/2022               | Erasmus Medical Center        | Erasmus Medical Center        |                                                                                                     |
| EP2297827 | NS | Netherlands | 2022-Sep-21 | EP_10_15579540 | A/Mallard/Netherlands/15/2022               | Erasmus Medical Center        | Erasmus Medical Center        |                                                                                                     |
| EP2297828 | MP | Netherlands | 2022-Sep-21 | EP_10_15579540 | A/Mallard/Netherlands/15/2022               | Erasmus Medical Center        | Erasmus Medical Center        |                                                                                                     |
| EP2297890 | NP | Netherlands | 2022-Oct-01 | EP_10_15579543 | A/Mallard/Netherlands/18/2022               | Erasmus Medical Center        | Erasmus Medical Center        |                                                                                                     |
| EP2297851 | NS | Netherlands | 2022-Oct-01 | EP_10_15579543 | A/Mallard/Netherlands/18/2022               | Erasmus Medical Center        | Erasmus Medical Center        |                                                                                                     |
| EP2297852 | MP | Netherlands | 2022-Oct-01 | EP_10_15579543 | A/Mallard/Netherlands/18/2022               | Erasmus Medical Center        | Erasmus Medical Center        |                                                                                                     |
| EP2297858 | NP | Netherlands | 2022-Oct-09 | EP_10_15579544 | A/Great Black-backed Gull/4/2022            | Erasmus Medical Center        | Erasmus Medical Center        |                                                                                                     |
| EP2297859 | NS | Netherlands | 2022-Oct-09 | EP_10_15579544 | A/Great Black-backed Gull/4/2022            | Erasmus Medical Center        | Erasmus Medical Center        |                                                                                                     |
| EP2297900 | MP | Netherlands | 2022-Oct-09 | EP_10_15579544 | A/Great Black-backed Gull/4/2022            | Erasmus Medical Center        | Erasmus Medical Center        |                                                                                                     |
| EP2297866 | NP | Netherlands | 2022-Oct-09 | EP_10_15579545 | A/Sanderling/Netherlands/22/2022            | Erasmus Medical Center        | Erasmus Medical Center        |                                                                                                     |
| EP2297867 | NS | Netherlands | 2022-Oct-09 | EP_10_15579545 | A/Sanderling/Netherlands/22/2022            | Erasmus Medical Center        | Erasmus Medical Center        |                                                                                                     |
| EP2297868 | MP | Netherlands | 2022-Oct-09 | EP_10_15579545 | A/Sanderling/Netherlands/22/2022            | Erasmus Medical Center        | Erasmus Medical Center        |                                                                                                     |
| EP2298049 | NP | Netherlands | 2022-Oct-12 | EP_10_15581789 | A/Mallard/Netherlands/19/2022               | Erasmus Medical Center        | Erasmus Medical Center        |                                                                                                     |
| EP2298050 | NS | Netherlands | 2022-Oct-12 | EP_10_15581789 | A/Mallard/Netherlands/19/2022               | Erasmus Medical Center        | Erasmus Medical Center        |                                                                                                     |
| EP2298051 | MP | Netherlands | 2022-Oct-12 | EP_10_15581789 | A/Mallard/Netherlands/19/2022               | Erasmus Medical Center        | Erasmus Medical Center        |                                                                                                     |
| EP2298064 | NP | Netherlands | 2022-Oct-11 | EP_10_15581791 | A/Mallard/Netherlands/21/2022               | Erasmus Medical Center        | Erasmus Medical Center        |                                                                                                     |
| EP2298065 | NS | Netherlands | 2022-Oct-11 | EP_10_15581791 | A/Mallard/Netherlands/21/2022               | Erasmus Medical Center        | Erasmus Medical Center        |                                                                                                     |
| EP2298066 | MP | Netherlands | 2022-Oct-11 | EP_10_15581791 | A/Mallard/Netherlands/21/2022               | Erasmus Medical Center        | Erasmus Medical Center        |                                                                                                     |
| EP2298071 | NP | Netherlands | 2022-Oct-11 | EP_10_15581792 | A/Mallard/Netherlands/22/2022               | Erasmus Medical Center        | Erasmus Medical Center        |                                                                                                     |

















|            |    |             |             |                |                                                         |                                        |                                                                |                                                                                                                                           |
|------------|----|-------------|-------------|----------------|---------------------------------------------------------|----------------------------------------|----------------------------------------------------------------|-------------------------------------------------------------------------------------------------------------------------------------------|
| EP1220896  | NP | Belgium     | 2022-Oct-10 | EP_1S_1589929  | A/Gallus_gallus/Belgium/11941_0001/2022                 | Sciensano - Animal Infectious Diseases | Sciensano, Department of Animal Infectious Diseases            |                                                                                                                                           |
| EP1220898  | MP | Belgium     | 2022-Oct-10 | EP_1S_1589929  | A/Gallus_gallus/Belgium/11941_0001/2022                 | Sciensano - Animal Infectious Diseases | Sciensano, Department of Animal Infectious Diseases            |                                                                                                                                           |
| EP1220899  | NS | Belgium     | 2022-Oct-10 | EP_1S_1589929  | A/Gallus_gallus/Belgium/11941_0001/2022                 | Sciensano - Animal Infectious Diseases | Sciensano, Department of Animal Infectious Diseases            |                                                                                                                                           |
| EP12214405 | NP | Netherlands | 2022-Oct-22 | EP_1S_15759949 | A/Common_Tea/Netherlands/1/2022                         | Erasmus Medical Center                 | Erasmus Medical Center                                         |                                                                                                                                           |
| EP12214406 | NS | Netherlands | 2022-Oct-22 | EP_1S_15759949 | A/Common_Tea/Netherlands/1/2022                         | Erasmus Medical Center                 | Erasmus Medical Center                                         |                                                                                                                                           |
| EP12214407 | MP | Netherlands | 2022-Oct-22 | EP_1S_15759949 | A/Common_Tea/Netherlands/1/2022                         | Erasmus Medical Center                 | Erasmus Medical Center                                         |                                                                                                                                           |
| EP12214472 | NP | Netherlands | 2022-Oct-31 | EP_1S_15759950 | A/Common_Buzzard/Netherlands/2/2022                     | Erasmus Medical Center                 | Erasmus Medical Center                                         |                                                                                                                                           |
| EP12214473 | NS | Netherlands | 2022-Oct-31 | EP_1S_15759950 | A/Common_Buzzard/Netherlands/2/2022                     | Erasmus Medical Center                 | Erasmus Medical Center                                         |                                                                                                                                           |
| EP12214474 | MP | Netherlands | 2022-Oct-31 | EP_1S_15759950 | A/Common_Buzzard/Netherlands/2/2022                     | Erasmus Medical Center                 | Erasmus Medical Center                                         |                                                                                                                                           |
| EP12214480 | NP | Netherlands | 2022-Oct-18 | EP_1S_15759951 | A/Mallard/Netherlands/24/2022                           | Erasmus Medical Center                 | Erasmus Medical Center                                         |                                                                                                                                           |
| EP12214481 | NS | Netherlands | 2022-Oct-18 | EP_1S_15759951 | A/Mallard/Netherlands/24/2022                           | Erasmus Medical Center                 | Erasmus Medical Center                                         |                                                                                                                                           |
| EP12214482 | MP | Netherlands | 2022-Oct-18 | EP_1S_15759951 | A/Mallard/Netherlands/24/2022                           | Erasmus Medical Center                 | Erasmus Medical Center                                         |                                                                                                                                           |
| EP12214493 | NP | Netherlands | 2022-Oct-25 | EP_1S_15759953 | A/Mallard/Netherlands/26/2022                           | Erasmus Medical Center                 | Erasmus Medical Center                                         |                                                                                                                                           |
| EP12214494 | NS | Netherlands | 2022-Oct-25 | EP_1S_15759953 | A/Mallard/Netherlands/26/2022                           | Erasmus Medical Center                 | Erasmus Medical Center                                         |                                                                                                                                           |
| EP12214495 | MP | Netherlands | 2022-Oct-25 | EP_1S_15759953 | A/Mallard/Netherlands/26/2022                           | Erasmus Medical Center                 | Erasmus Medical Center                                         |                                                                                                                                           |
| EP12218142 | NP | Belgium     | 2022-Sep-16 | EP_1S_15812579 | A/Anser_anser_domesticus/Belgium/2018_0002/2022         | Sciensano - Animal Infectious Diseases | Sciensano, Department of Animal Infectious Diseases            | Van Borm, Steven; Roupie, Virginie; Lambrecht, Benedicte; Steensels, Mieke                                                                |
| EP12218144 | MP | Belgium     | 2022-Sep-16 | EP_1S_15812579 | A/Anser_anser_domesticus/Belgium/2018_0002/2022         | Sciensano - Animal Infectious Diseases | Sciensano, Department of Animal Infectious Diseases            | Van Borm, Steven; Roupie, Virginie; Lambrecht, Benedicte; Steensels, Mieke                                                                |
| EP12218145 | NS | Belgium     | 2022-Sep-16 | EP_1S_15812579 | A/Anser_anser_domesticus/Belgium/2018_0002/2022         | Sciensano - Animal Infectious Diseases | Sciensano, Department of Animal Infectious Diseases            | Van Borm, Steven; Roupie, Virginie; Lambrecht, Benedicte; Steensels, Mieke                                                                |
| EP12218155 | NS | Belgium     | 2022-Oct-04 | EP_1S_15812678 | A/Anas_platyrhynchos_domesticus/Belgium/11599_0005/2022 | Sciensano - Animal Infectious Diseases | Sciensano, Department of Animal Infectious Diseases            | Van Borm, Steven; Mathij, Elisabeth; Roupie, Virginie; Lambrecht, Benedicte; Steensels, Mieke                                             |
| EP12218154 | MP | Belgium     | 2022-Oct-04 | EP_1S_15812678 | A/Anas_platyrhynchos_domesticus/Belgium/11599_0005/2022 | Sciensano - Animal Infectious Diseases | Sciensano, Department of Animal Infectious Diseases            | Van Borm, Steven; Mathij, Elisabeth; Roupie, Virginie; Lambrecht, Benedicte; Steensels, Mieke                                             |
| EP12218152 | NP | Belgium     | 2022-Oct-04 | EP_1S_15812678 | A/Anas_platyrhynchos_domesticus/Belgium/11599_0005/2022 | Sciensano - Animal Infectious Diseases | Sciensano, Department of Animal Infectious Diseases            | Van Borm, Steven; Mathij, Elisabeth; Roupie, Virginie; Lambrecht, Benedicte; Steensels, Mieke                                             |
| EP12220393 | MP | France      | 2022-Nov-08 | EP_1S_15857992 | A/Chickens/France/23P033202/2022                        | Anses (Plouffagan-Plouaen)             | ANSES Agence Nationale De Securite Sanitaire De L'alimentation |                                                                                                                                           |
| EP12220391 | NP | France      | 2022-Nov-08 | EP_1S_15857992 | A/Chickens/France/23P033202/2022                        | Anses (Plouffagan-Plouaen)             | ANSES Agence Nationale De Securite Sanitaire De L'alimentation |                                                                                                                                           |
| EP12220394 | NS | France      | 2022-Nov-08 | EP_1S_15857992 | A/Chickens/France/23P033202/2022                        | Anses (Plouffagan-Plouaen)             | ANSES Agence Nationale De Securite Sanitaire De L'alimentation |                                                                                                                                           |
| EP12222909 | NP | Netherlands | 2022-Oct-31 | EP_1S_15909904 | A/Bernacle_Goose/Netherlands/2303955-001/2022           | Wageningen Bioveterinary Research      | Wageningen Bioveterinary Research                              | Beersma, Nancy; Handers, Frank; Pitz-Verschuuren, Sylvie; Rooze, Merit; Vanma, Sandra; Germeaad, Evelien; Driehuis, Marc; Heuvelink, Rene |
| EP12222970 | NS | Netherlands | 2022-Oct-31 | EP_1S_15909904 | A/Bernacle_Goose/Netherlands/2303955-001/2022           | Wageningen Bioveterinary Research      | Wageningen Bioveterinary Research                              | Beersma, Nancy; Handers, Frank; Pitz-Verschuuren, Sylvie; Rooze, Merit; Vanma, Sandra; Germeaad, Evelien; Driehuis, Marc; Heuvelink, Rene |
| EP12222971 | MP | Netherlands | 2022-Oct-31 | EP_1S_15909904 | A/Bernacle_Goose/Netherlands/2303955-001/2022           | Wageningen Bioveterinary Research      | Wageningen Bioveterinary Research                              | Beersma, Nancy; Handers, Frank; Pitz-Verschuuren, Sylvie; Rooze, Merit; Vanma, Sandra; Germeaad, Evelien; Driehuis, Marc; Heuvelink, Rene |
| EP12223234 | NP | Netherlands | 2022-Oct-29 | EP_1S_15925875 | A/Turkian_Wigeon/Netherlands/1/2022                     | Erasmus Medical Center                 | Erasmus Medical Center                                         |                                                                                                                                           |
| EP12223235 | NS | Netherlands | 2022-Oct-29 | EP_1S_15925875 | A/Turkian_Wigeon/Netherlands/1/2022                     | Erasmus Medical Center                 | Erasmus Medical Center                                         |                                                                                                                                           |
| EP12223236 | MP | Netherlands | 2022-Oct-29 | EP_1S_15925875 | A/Turkian_Wigeon/Netherlands/1/2022                     | Erasmus Medical Center                 | Erasmus Medical Center                                         |                                                                                                                                           |
| EP12223242 | NP | Netherlands | 2022-Oct-29 | EP_1S_15925875 | A/Turkian_Wigeon/Netherlands/1/2022                     | Erasmus Medical Center                 | Erasmus Medical Center                                         |                                                                                                                                           |
| EP12223243 | NS | Netherlands | 2022-Oct-29 | EP_1S_15925875 | A/Turkian_Wigeon/Netherlands/1/2022                     | Erasmus Medical Center                 | Erasmus Medical Center                                         |                                                                                                                                           |
| EP12223244 | MP | Netherlands | 2022-Oct-29 | EP_1S_15925875 | A/Turkian_Wigeon/Netherlands/1/2022                     | Erasmus Medical Center                 | Erasmus Medical Center                                         |                                                                                                                                           |
| EP12223257 | NP | Netherlands | 2022-Nov-01 | EP_1S_15925878 | A/Common_Tea/Netherlands/1/2022                         | Erasmus Medical Center                 | Erasmus Medical Center                                         |                                                                                                                                           |
| EP12223258 | NS | Netherlands | 2022-Nov-01 | EP_1S_15925878 | A/Common_Tea/Netherlands/1/2022                         | Erasmus Medical Center                 | Erasmus Medical Center                                         |                                                                                                                                           |













|            |    |                |             |                |                                            |                                                                      |                                       |                                                                                                                                                 |
|------------|----|----------------|-------------|----------------|--------------------------------------------|----------------------------------------------------------------------|---------------------------------------|-------------------------------------------------------------------------------------------------------------------------------------------------|
| EP12233099 | NP | United Kingdom | 2022-Nov-15 | EP_18_15957988 | A/turkey/England/15235/2022                | Animal and Plant Health Agency (APHA)                                | Animal and Plant Health Agency (APHA) | Byrne, A.; Heaton, N.; Maskell, D.; Mallett, S.; Peers-Dent, I.                                                                                 |
| EP12233100 | NS | United Kingdom | 2022-Nov-15 | EP_18_15957988 | A/turkey/England/15235/2022                | Animal and Plant Health Agency (APHA)                                | Animal and Plant Health Agency (APHA) | Byrne, A.; Heaton, N.; Maskell, D.; Mallett, S.; Peers-Dent, I.                                                                                 |
| EP12233101 | MP | United Kingdom | 2022-Nov-15 | EP_18_15957988 | A/turkey/England/15235/2022                | Animal and Plant Health Agency (APHA)                                | Animal and Plant Health Agency (APHA) | Byrne, A.; Heaton, N.; Maskell, D.; Mallett, S.; Peers-Dent, I.                                                                                 |
| EP12233107 | NP | United Kingdom | 2022-Nov-15 | EP_18_15958004 | A/domestic_duck/England/152473/2022        | Animal and Plant Health Agency (APHA)                                | Animal and Plant Health Agency (APHA) | Byrne, A.; Heaton, N.; Maskell, D.; Mallett, S.; Peers-Dent, I.                                                                                 |
| EP12233108 | NS | United Kingdom | 2022-Nov-15 | EP_18_15958004 | A/domestic_duck/England/152473/2022        | Animal and Plant Health Agency (APHA)                                | Animal and Plant Health Agency (APHA) | Byrne, A.; Heaton, N.; Maskell, D.; Mallett, S.; Peers-Dent, I.                                                                                 |
| EP12233109 | MP | United Kingdom | 2022-Nov-15 | EP_18_15958004 | A/domestic_duck/England/152473/2022        | Animal and Plant Health Agency (APHA)                                | Animal and Plant Health Agency (APHA) | Byrne, A.; Heaton, N.; Maskell, D.; Mallett, S.; Peers-Dent, I.                                                                                 |
| EP12233115 | NP | United Kingdom | 2022-Nov-03 | EP_18_15958011 | A/Domestic_Duck/England/144945/2022        | Animal and Plant Health Agency (APHA)                                | Animal and Plant Health Agency (APHA) | Byrne, A.; Heaton, N.; Maskell, D.; Mallett, S.; Peers-Dent, I.                                                                                 |
| EP12233116 | NS | United Kingdom | 2022-Nov-03 | EP_18_15958011 | A/Domestic_Duck/England/144945/2022        | Animal and Plant Health Agency (APHA)                                | Animal and Plant Health Agency (APHA) | Byrne, A.; Heaton, N.; Maskell, D.; Mallett, S.; Peers-Dent, I.                                                                                 |
| EP12233117 | MP | United Kingdom | 2022-Nov-03 | EP_18_15958011 | A/Domestic_Duck/England/144945/2022        | Animal and Plant Health Agency (APHA)                                | Animal and Plant Health Agency (APHA) | Byrne, A.; Heaton, N.; Maskell, D.; Mallett, S.; Peers-Dent, I.                                                                                 |
| EP12233139 | NP | United Kingdom | 2022-Oct-21 | EP_18_15958027 | A/Phasant/Wales/394561/2022                | Animal and Plant Health Agency (APHA)                                | Animal and Plant Health Agency (APHA) | Byrne, A.; Heaton, N.; Maskell, D.; Mallett, S.; Peers-Dent, I.                                                                                 |
| EP12233140 | NS | United Kingdom | 2022-Oct-21 | EP_18_15958027 | A/Phasant/Wales/394561/2022                | Animal and Plant Health Agency (APHA)                                | Animal and Plant Health Agency (APHA) | Byrne, A.; Heaton, N.; Maskell, D.; Mallett, S.; Peers-Dent, I.                                                                                 |
| EP12233141 | MP | United Kingdom | 2022-Oct-21 | EP_18_15958027 | A/Phasant/Wales/394561/2022                | Animal and Plant Health Agency (APHA)                                | Animal and Plant Health Agency (APHA) | Byrne, A.; Heaton, N.; Maskell, D.; Mallett, S.; Peers-Dent, I.                                                                                 |
| EP12238844 | NP | Netherlands    | 2022-Nov-21 | EP_18_16040784 | A/Glossy/Netherlands/22020788-001/2022     | Wageningen Bioveterinary Research                                    | Wageningen Bioveterinary Research     | Beersma, Nancy; Harders, Frank; Pritz-Verschuuren, Sylvia; Rooze, Merit; Voncken, Sandra; Germersmaad, Evelien; Daghfene, Marc; Heuvelink, Rene |
| EP12238845 | NS | Netherlands    | 2022-Nov-21 | EP_18_16040784 | A/Glossy/Netherlands/22020788-001/2022     | Wageningen Bioveterinary Research                                    | Wageningen Bioveterinary Research     | Beersma, Nancy; Harders, Frank; Pritz-Verschuuren, Sylvia; Rooze, Merit; Voncken, Sandra; Germersmaad, Evelien; Daghfene, Marc; Heuvelink, Rene |
| EP12238846 | MP | Netherlands    | 2022-Nov-21 | EP_18_16040784 | A/Glossy/Netherlands/22020788-001/2022     | Wageningen Bioveterinary Research                                    | Wageningen Bioveterinary Research     | Beersma, Nancy; Harders, Frank; Pritz-Verschuuren, Sylvia; Rooze, Merit; Voncken, Sandra; Germersmaad, Evelien; Daghfene, Marc; Heuvelink, Rene |
| EP12240703 | NP | Netherlands    | 2022-Nov-04 | EP_18_16056568 | A/Turkian Wigeon/Netherlands/2/2022        | Erasmus Medical Center                                               | Erasmus Medical Center                |                                                                                                                                                 |
| EP12240704 | NS | Netherlands    | 2022-Nov-04 | EP_18_16056568 | A/Turkian Wigeon/Netherlands/2/2022        | Erasmus Medical Center                                               | Erasmus Medical Center                |                                                                                                                                                 |
| EP12240705 | MP | Netherlands    | 2022-Nov-04 | EP_18_16056568 | A/Turkian Wigeon/Netherlands/2/2022        | Erasmus Medical Center                                               | Erasmus Medical Center                |                                                                                                                                                 |
| EP12240711 | NP | Netherlands    | 2022-Nov-15 | EP_18_16056569 | A/Gadwall/Netherlands/2/2022               | Erasmus Medical Center                                               | Erasmus Medical Center                |                                                                                                                                                 |
| EP12240712 | NS | Netherlands    | 2022-Nov-15 | EP_18_16056569 | A/Gadwall/Netherlands/2/2022               | Erasmus Medical Center                                               | Erasmus Medical Center                |                                                                                                                                                 |
| EP12240713 | MP | Netherlands    | 2022-Nov-15 | EP_18_16056569 | A/Gadwall/Netherlands/2/2022               | Erasmus Medical Center                                               | Erasmus Medical Center                |                                                                                                                                                 |
| EP12240719 | NP | Netherlands    | 2022-Nov-08 | EP_18_16056570 | A/Mallard Duck/Netherlands/27/2022         | Erasmus Medical Center                                               | Erasmus Medical Center                |                                                                                                                                                 |
| EP12240720 | NS | Netherlands    | 2022-Nov-08 | EP_18_16056570 | A/Mallard Duck/Netherlands/27/2022         | Erasmus Medical Center                                               | Erasmus Medical Center                |                                                                                                                                                 |
| EP12240721 | MP | Netherlands    | 2022-Nov-08 | EP_18_16056570 | A/Mallard Duck/Netherlands/27/2022         | Erasmus Medical Center                                               | Erasmus Medical Center                |                                                                                                                                                 |
| EP12240727 | NP | Netherlands    | 2022-Nov-09 | EP_18_16056571 | A/Mallard Duck/Netherlands/28/2022         | Erasmus Medical Center                                               | Erasmus Medical Center                |                                                                                                                                                 |
| EP12240728 | NS | Netherlands    | 2022-Nov-09 | EP_18_16056571 | A/Mallard Duck/Netherlands/28/2022         | Erasmus Medical Center                                               | Erasmus Medical Center                |                                                                                                                                                 |
| EP12240729 | MP | Netherlands    | 2022-Nov-09 | EP_18_16056571 | A/Mallard Duck/Netherlands/28/2022         | Erasmus Medical Center                                               | Erasmus Medical Center                |                                                                                                                                                 |
| EP12240735 | NP | Netherlands    | 2022-Nov-17 | EP_18_16056572 | A/Mallard Duck/Netherlands/29/2022         | Erasmus Medical Center                                               | Erasmus Medical Center                |                                                                                                                                                 |
| EP12240736 | NS | Netherlands    | 2022-Nov-17 | EP_18_16056572 | A/Mallard Duck/Netherlands/29/2022         | Erasmus Medical Center                                               | Erasmus Medical Center                |                                                                                                                                                 |
| EP12240737 | MP | Netherlands    | 2022-Nov-17 | EP_18_16056572 | A/Mallard Duck/Netherlands/29/2022         | Erasmus Medical Center                                               | Erasmus Medical Center                |                                                                                                                                                 |
| EP12242295 | NS | Germany        | 2022-Jun-30 | EP_18_16086040 | A/artic. tern/Germany/SH/A033798/2022      | Landeslabor Schleswig-Holstein                                       | Friedrich-Loeffler-Institut           |                                                                                                                                                 |
| EP12242294 | NP | Germany        | 2022-Jun-30 | EP_18_16086040 | A/artic. tern/Germany/SH/A033798/2022      | Landeslabor Schleswig-Holstein                                       | Friedrich-Loeffler-Institut           |                                                                                                                                                 |
| EP12242292 | MP | Germany        | 2022-Jun-30 | EP_18_16086040 | A/artic. tern/Germany/SH/A033798/2022      | Landeslabor Schleswig-Holstein                                       | Friedrich-Loeffler-Institut           |                                                                                                                                                 |
| EP12242300 | MP | Germany        | 2022-Feb-07 | EP_18_16086042 | A/black-headed gull/Germany/B/A010262/2022 | Bayrisches Landesamt für Gesundheit und Lebensmittelsicherheit (LGL) | Friedrich-Loeffler-Institut           |                                                                                                                                                 |
| EP12242302 | NP | Germany        | 2022-Feb-07 | EP_18_16086042 | A/black-headed gull/Germany/B/A010262/2022 | Bayrisches Landesamt für Gesundheit und Lebensmittelsicherheit (LGL) | Friedrich-Loeffler-Institut           |                                                                                                                                                 |

|            |    |         |             |                |                                              |                                                                            |                             |                               |
|------------|----|---------|-------------|----------------|----------------------------------------------|----------------------------------------------------------------------------|-----------------------------|-------------------------------|
| EP12242303 | NS | Germany | 2022-Feb-07 | EP_1S_16080642 | A/black-headed_gull/Germany/8/AD0302/2022    | Bayrisches Landesamt für Gesundheit und Lebensmittelsicherheit (GL)        | Friedrich-Loeffler-Institut |                               |
| EP12242309 | MP | Germany | 2022-Jul-02 | EP_1S_16080644 | A/black-headed_gull/Germany/19/AD03795/2022  | Institut für Hygiene und Umwelt                                            | Friedrich-Loeffler-Institut |                               |
| EP12242311 | NP | Germany | 2022-Jul-02 | EP_1S_16080644 | A/black-headed_gull/Germany/19/AD03795/2022  | Institut für Hygiene und Umwelt                                            | Friedrich-Loeffler-Institut |                               |
| EP12242312 | NS | Germany | 2022-Jul-02 | EP_1S_16080644 | A/black-headed_gull/Germany/19/AD03795/2022  | Institut für Hygiene und Umwelt                                            | Friedrich-Loeffler-Institut |                               |
| EP12242318 | MP | Germany | 2022-Jul-04 | EP_1S_16080647 | A/black-headed_gull/Germany/6/AD0154/2022    | Lebensmittel- und Veterinärinstitut Oldenburg - Standort Veterinärinstitut | Friedrich-Loeffler-Institut |                               |
| EP12242320 | NP | Germany | 2022-Jul-04 | EP_1S_16080647 | A/black-headed_gull/Germany/6/AD0154/2022    | Lebensmittel- und Veterinärinstitut Oldenburg - Standort Veterinärinstitut | Friedrich-Loeffler-Institut |                               |
| EP12242321 | NS | Germany | 2022-Jul-04 | EP_1S_16080647 | A/black-headed_gull/Germany/6/AD0154/2022    | Lebensmittel- und Veterinärinstitut Oldenburg - Standort Veterinärinstitut | Friedrich-Loeffler-Institut |                               |
| EP12242457 | MP | Germany | 2022-Jul-14 | EP_1S_16080626 | A/common_tern/Germany/1/AD4284/2022          | Lebensmittel- und Veterinärinstitut Oldenburg - Standort Veterinärinstitut | Friedrich-Loeffler-Institut |                               |
| EP12242459 | NP | Germany | 2022-Jul-14 | EP_1S_16080626 | A/common_tern/Germany/1/AD4284/2022          | Lebensmittel- und Veterinärinstitut Oldenburg - Standort Veterinärinstitut | Friedrich-Loeffler-Institut |                               |
| EP12242460 | NS | Germany | 2022-Jul-14 | EP_1S_16080626 | A/common_tern/Germany/1/AD4284/2022          | Lebensmittel- und Veterinärinstitut Oldenburg - Standort Veterinärinstitut | Friedrich-Loeffler-Institut |                               |
| EP12244002 | NP | Denmark | 2022-Jun-19 | EP_1S_16112044 | A/arctic_tern/Denmark/05803-1.02/2022        | Statens Serum Institut                                                     | Statens Serum Institut      | Hjalager,Charlotte;Liang,Yuan |
| EP12244004 | MP | Denmark | 2022-Jun-19 | EP_1S_16112044 | A/arctic_tern/Denmark/05803-1.02/2022        | Statens Serum Institut                                                     | Statens Serum Institut      | Hjalager,Charlotte;Liang,Yuan |
| EP12244005 | NS | Denmark | 2022-Jun-19 | EP_1S_16112044 | A/arctic_tern/Denmark/05803-1.02/2022        | Statens Serum Institut                                                     | Statens Serum Institut      | Hjalager,Charlotte;Liang,Yuan |
| EP12244157 | MP | Denmark | 2022-Apr-20 | EP_1S_16113089 | A/herring_gull/Denmark/05333-1.02/2022       | Statens Serum Institut                                                     | Statens Serum Institut      | Hjalager,Charlotte;Liang,Yuan |
| EP12244158 | NS | Denmark | 2022-Apr-20 | EP_1S_16113089 | A/herring_gull/Denmark/05333-1.02/2022       | Statens Serum Institut                                                     | Statens Serum Institut      | Hjalager,Charlotte;Liang,Yuan |
| EP12244155 | NP | Denmark | 2022-Apr-20 | EP_1S_16113089 | A/herring_gull/Denmark/05333-1.02/2022       | Statens Serum Institut                                                     | Statens Serum Institut      | Hjalager,Charlotte;Liang,Yuan |
| EP12244211 | NP | Denmark | 2022-Jul-17 | EP_1S_16113090 | A/peregrine_falcon/Denmark/06880-1.02/2022   | Statens Serum Institut                                                     | Statens Serum Institut      | Hjalager,Charlotte;Liang,Yuan |
| EP12244212 | MP | Denmark | 2022-Jul-17 | EP_1S_16113090 | A/peregrine_falcon/Denmark/06880-1.02/2022   | Statens Serum Institut                                                     | Statens Serum Institut      | Hjalager,Charlotte;Liang,Yuan |
| EP12244214 | NS | Denmark | 2022-Jul-17 | EP_1S_16113090 | A/peregrine_falcon/Denmark/06880-1.02/2022   | Statens Serum Institut                                                     | Statens Serum Institut      | Hjalager,Charlotte;Liang,Yuan |
| EP12244205 | MP | Denmark | 2022-Jun-14 | EP_1S_16113225 | A/handwich_tern/Denmark/05732-1.02/2022      | Statens Serum Institut                                                     | Statens Serum Institut      | Hjalager,Charlotte;Liang,Yuan |
| EP12244206 | NS | Denmark | 2022-Jun-14 | EP_1S_16113225 | A/handwich_tern/Denmark/05732-1.02/2022      | Statens Serum Institut                                                     | Statens Serum Institut      | Hjalager,Charlotte;Liang,Yuan |
| EP12244203 | NP | Denmark | 2022-Jun-14 | EP_1S_16113225 | A/handwich_tern/Denmark/05732-1.02/2022      | Statens Serum Institut                                                     | Statens Serum Institut      | Hjalager,Charlotte;Liang,Yuan |
| EP12244197 | MP | Denmark | 2022-Jun-17 | EP_1S_16113229 | A/handwich_tern/Denmark/05802-1.01_2022      | Statens Serum Institut                                                     | Statens Serum Institut      | Hjalager,Charlotte;Liang,Yuan |
| EP12244195 | NP | Denmark | 2022-Jun-17 | EP_1S_16113229 | A/handwich_tern/Denmark/05802-1.01_2022      | Statens Serum Institut                                                     | Statens Serum Institut      | Hjalager,Charlotte;Liang,Yuan |
| EP12244198 | NS | Denmark | 2022-Jun-17 | EP_1S_16113229 | A/handwich_tern/Denmark/05802-1.01_2022      | Statens Serum Institut                                                     | Statens Serum Institut      | Hjalager,Charlotte;Liang,Yuan |
| EP12244187 | MP | Denmark | 2022-Jun-19 | EP_1S_16113230 | A/handwich_tern/Denmark/05806-1.01/2022      | Statens Serum Institut                                                     | Statens Serum Institut      | Hjalager,Charlotte;Liang,Yuan |
| EP12244189 | NP | Denmark | 2022-Jun-19 | EP_1S_16113230 | A/handwich_tern/Denmark/05806-1.01/2022      | Statens Serum Institut                                                     | Statens Serum Institut      | Hjalager,Charlotte;Liang,Yuan |
| EP12244190 | NS | Denmark | 2022-Jun-19 | EP_1S_16113230 | A/handwich_tern/Denmark/05806-1.01/2022      | Statens Serum Institut                                                     | Statens Serum Institut      | Hjalager,Charlotte;Liang,Yuan |
| EP12244182 | NS | Denmark | 2022-Jun-08 | EP_1S_16113231 | A/hewey_owl/Denmark/05372-1.02/2022          | Statens Serum Institut                                                     | Statens Serum Institut      | Hjalager,Charlotte;Liang,Yuan |
| EP12244179 | NP | Denmark | 2022-Jun-08 | EP_1S_16113231 | A/hewey_owl/Denmark/05372-1.02/2022          | Statens Serum Institut                                                     | Statens Serum Institut      | Hjalager,Charlotte;Liang,Yuan |
| EP12244181 | MP | Denmark | 2022-Jun-08 | EP_1S_16113231 | A/hewey_owl/Denmark/05372-1.02/2022          | Statens Serum Institut                                                     | Statens Serum Institut      | Hjalager,Charlotte;Liang,Yuan |
| EP12244171 | NP | Denmark | 2022-Jun-08 | EP_1S_16113242 | A/hewey_owl/Denmark/05373-1.01/2022          | Statens Serum Institut                                                     | Statens Serum Institut      | Hjalager,Charlotte;Liang,Yuan |
| EP12244174 | NS | Denmark | 2022-Jun-08 | EP_1S_16113242 | A/hewey_owl/Denmark/05373-1.01/2022          | Statens Serum Institut                                                     | Statens Serum Institut      | Hjalager,Charlotte;Liang,Yuan |
| EP12244173 | MP | Denmark | 2022-Jun-08 | EP_1S_16113242 | A/hewey_owl/Denmark/05373-1.01/2022          | Statens Serum Institut                                                     | Statens Serum Institut      | Hjalager,Charlotte;Liang,Yuan |
| EP12244166 | NS | Denmark | 2022-Jun-11 | EP_1S_16113366 | A/white-tailed_eagle/Denmark/05716-1.04/2022 | Statens Serum Institut                                                     | Statens Serum Institut      | Hjalager,Charlotte;Liang,Yuan |

|            |    |                |             |                |                                              |                                                                            |                                       |                               |
|------------|----|----------------|-------------|----------------|----------------------------------------------|----------------------------------------------------------------------------|---------------------------------------|-------------------------------|
| EP12244105 | MP | Denmark        | 2022-Jun-11 | EP_10_1611396  | A/white-tailed_eagle/Denmark/05716-1.06/2022 | Statens Serum Institut                                                     | Statens Serum Institut                | Hjalager,Charlotte;Liang,Yuan |
| EP12244103 | NP | Denmark        | 2022-Jun-11 | EP_10_1611396  | A/white-tailed_eagle/Denmark/05716-1.06/2022 | Statens Serum Institut                                                     | Statens Serum Institut                | Hjalager,Charlotte;Liang,Yuan |
| EP12244119 | NP | Denmark        | 2022-Aug-30 | EP_10_1611504  | A/common_buzzard/Denmark/08287-1.01/2022     | Statens Serum Institut                                                     | Statens Serum Institut                | Hjalager,Charlotte;Liang,Yuan |
| EP12244222 | NS | Denmark        | 2022-Aug-30 | EP_10_1611504  | A/common_buzzard/Denmark/08287-1.01/2022     | Statens Serum Institut                                                     | Statens Serum Institut                | Hjalager,Charlotte;Liang,Yuan |
| EP12244221 | MP | Denmark        | 2022-Aug-30 | EP_10_1611504  | A/common_buzzard/Denmark/08287-1.01/2022     | Statens Serum Institut                                                     | Statens Serum Institut                | Hjalager,Charlotte;Liang,Yuan |
| EP12244259 | NS | Germany        | 2022-Jul-25 | EP_10_16122075 | A/domestic_goose/Germany/SI/AD6267/2022      | Landeslabor Schleswig-Holstein                                             | Friedrich-Loeffler-Institut           |                               |
| EP12244296 | MP | Germany        | 2022-Jul-25 | EP_10_16122075 | A/domestic_goose/Germany/SI/AD6267/2022      | Landeslabor Schleswig-Holstein                                             | Friedrich-Loeffler-Institut           |                               |
| EP12244298 | NP | Germany        | 2022-Jul-25 | EP_10_16122075 | A/domestic_goose/Germany/SI/AD6267/2022      | Landeslabor Schleswig-Holstein                                             | Friedrich-Loeffler-Institut           |                               |
| EP12244170 | NP | Germany        | 2022-Jul-08 | EP_10_16122154 | A/northern_garret/Germany/N/AD424/2022       | Lebensmittel- und Veterinärinstitut Oldenburg - Standort Veterinärinstitut | Friedrich-Loeffler-Institut           |                               |
| EP12244168 | MP | Germany        | 2022-Jul-08 | EP_10_16122154 | A/northern_garret/Germany/N/AD424/2022       | Lebensmittel- und Veterinärinstitut Oldenburg - Standort Veterinärinstitut | Friedrich-Loeffler-Institut           |                               |
| EP12244171 | NS | Germany        | 2022-Jul-08 | EP_10_16122154 | A/northern_garret/Germany/N/AD424/2022       | Lebensmittel- und Veterinärinstitut Oldenburg - Standort Veterinärinstitut | Friedrich-Loeffler-Institut           |                               |
| EP12254185 | MP | Luxembourg     | 2022-Dec-11 | EP_10_16206845 | A/genoa/Luxembourg/2225283/2022              | Laboratoire de médecine vétérinaire de l'Etat                              | Luxembourg Institute of Health        | Chantal Smeets, Aurélie Seauy |
| EP12254184 | NS | Luxembourg     | 2022-Dec-11 | EP_10_16206845 | A/genoa/Luxembourg/2225283/2022              | Laboratoire de médecine vétérinaire de l'Etat                              | Luxembourg Institute of Health        | Chantal Smeets, Aurélie Seauy |
| EP12254186 | NP | Luxembourg     | 2022-Dec-11 | EP_10_16206845 | A/genoa/Luxembourg/2225283/2022              | Laboratoire de médecine vétérinaire de l'Etat                              | Luxembourg Institute of Health        | Chantal Smeets, Aurélie Seauy |
| EP12259803 | NP | Netherlands    | 2022-Dec-07 | EP_10_16255341 | A/Mallard/Netherlands/11/2022                | Erasmus Medical Center                                                     | Erasmus Medical Center                |                               |
| EP12259804 | NS | Netherlands    | 2022-Dec-07 | EP_10_16255341 | A/Mallard/Netherlands/11/2022                | Erasmus Medical Center                                                     | Erasmus Medical Center                |                               |
| EP12259805 | MP | Netherlands    | 2022-Dec-07 | EP_10_16255341 | A/Mallard/Netherlands/11/2022                | Erasmus Medical Center                                                     | Erasmus Medical Center                |                               |
| EP12277802 | NP | United Kingdom | 2022-Oct-31 | EP_10_16384125 | A/peewee/England/131070/2022                 | Animal and Plant Health Agency (APHA)                                      | Animal and Plant Health Agency (APHA) |                               |
| EP12277803 | NS | United Kingdom | 2022-Oct-31 | EP_10_16384125 | A/peewee/England/131070/2022                 | Animal and Plant Health Agency (APHA)                                      | Animal and Plant Health Agency (APHA) |                               |
| EP12277804 | MP | United Kingdom | 2022-Oct-31 | EP_10_16384125 | A/peewee/England/131070/2022                 | Animal and Plant Health Agency (APHA)                                      | Animal and Plant Health Agency (APHA) |                               |
| EP12277818 | NP | United Kingdom | 2022-Oct-28 | EP_10_16384127 | A/grey_heron/England/142125/2022             | Animal and Plant Health Agency (APHA)                                      | Animal and Plant Health Agency (APHA) |                               |
| EP12277819 | NS | United Kingdom | 2022-Oct-28 | EP_10_16384127 | A/grey_heron/England/142125/2022             | Animal and Plant Health Agency (APHA)                                      | Animal and Plant Health Agency (APHA) |                               |
| EP12277820 | MP | United Kingdom | 2022-Oct-28 | EP_10_16384127 | A/grey_heron/England/142125/2022             | Animal and Plant Health Agency (APHA)                                      | Animal and Plant Health Agency (APHA) |                               |
| EP12277826 | NP | United Kingdom | 2022-Oct-27 | EP_10_16384128 | A/turkey/England/141610/2022                 | Animal and Plant Health Agency (APHA)                                      | Animal and Plant Health Agency (APHA) |                               |
| EP12277827 | NS | United Kingdom | 2022-Oct-27 | EP_10_16384128 | A/turkey/England/141610/2022                 | Animal and Plant Health Agency (APHA)                                      | Animal and Plant Health Agency (APHA) |                               |
| EP12277828 | MP | United Kingdom | 2022-Oct-27 | EP_10_16384128 | A/turkey/England/141610/2022                 | Animal and Plant Health Agency (APHA)                                      | Animal and Plant Health Agency (APHA) |                               |
| EP12277834 | NP | United Kingdom | 2022-Oct-21 | EP_10_16384129 | A/turkey/England/138370/2022                 | Animal and Plant Health Agency (APHA)                                      | Animal and Plant Health Agency (APHA) |                               |
| EP12277835 | NS | United Kingdom | 2022-Oct-21 | EP_10_16384129 | A/turkey/England/138370/2022                 | Animal and Plant Health Agency (APHA)                                      | Animal and Plant Health Agency (APHA) |                               |
| EP12277836 | MP | United Kingdom | 2022-Oct-21 | EP_10_16384129 | A/turkey/England/138370/2022                 | Animal and Plant Health Agency (APHA)                                      | Animal and Plant Health Agency (APHA) |                               |
| EP12277842 | NP | United Kingdom | 2022-Oct-20 | EP_10_16384137 | A/domestic_duck/England/137953/2022          | Animal and Plant Health Agency (APHA)                                      | Animal and Plant Health Agency (APHA) |                               |
| EP12277843 | NS | United Kingdom | 2022-Oct-20 | EP_10_16384137 | A/domestic_duck/England/137953/2022          | Animal and Plant Health Agency (APHA)                                      | Animal and Plant Health Agency (APHA) |                               |
| EP12277844 | MP | United Kingdom | 2022-Oct-20 | EP_10_16384137 | A/domestic_duck/England/137953/2022          | Animal and Plant Health Agency (APHA)                                      | Animal and Plant Health Agency (APHA) |                               |
| EP12277850 | NP | United Kingdom | 2022-Oct-14 | EP_10_16384138 | A/domestic_goose/England/131125/2022         | Animal and Plant Health Agency (APHA)                                      | Animal and Plant Health Agency (APHA) |                               |
| EP12277851 | NS | United Kingdom | 2022-Oct-14 | EP_10_16384138 | A/domestic_goose/England/131125/2022         | Animal and Plant Health Agency (APHA)                                      | Animal and Plant Health Agency (APHA) |                               |
| EP12277852 | MP | United Kingdom | 2022-Oct-14 | EP_10_16384138 | A/domestic_goose/England/131125/2022         | Animal and Plant Health Agency (APHA)                                      | Animal and Plant Health Agency (APHA) |                               |

















|          |    |                |             |                |                                            |                                        |                                                     |                                                                                           |
|----------|----|----------------|-------------|----------------|--------------------------------------------|----------------------------------------|-----------------------------------------------------|-------------------------------------------------------------------------------------------|
| EP123041 | MP | Belgium        | 2022-Dec-08 | EP_18_16549380 | A/Vulpes_vulpes/Belgium/14775-0001/2022    | Scenarios - Animal Infectious Diseases | Scenarios, Department of Animal Infectious Diseases | Van Borm, Steven; Rogier, Virginie; Heintj, Pierre; Lambrecht, Benedicte; Steenuis, Mieke |
| EP123042 | NS | Belgium        | 2022-Dec-08 | EP_18_16549380 | A/Vulpes_vulpes/Belgium/14775-0001/2022    | Scenarios - Animal Infectious Diseases | Scenarios, Department of Animal Infectious Diseases | Van Borm, Steven; Rogier, Virginie; Heintj, Pierre; Lambrecht, Benedicte; Steenuis, Mieke |
| EP123043 | NP | United Kingdom | 2022-Dec-16 | EP_18_16574465 | A/moonhen/Wales/171529/2022                | Animal and Plant Health Agency (APHA)  | Animal and Plant Health Agency (APHA)               |                                                                                           |
| EP123044 | NS | United Kingdom | 2022-Dec-16 | EP_18_16574465 | A/moonhen/Wales/171529/2022                | Animal and Plant Health Agency (APHA)  | Animal and Plant Health Agency (APHA)               |                                                                                           |
| EP123045 | MP | United Kingdom | 2022-Dec-16 | EP_18_16574465 | A/moonhen/Wales/171529/2022                | Animal and Plant Health Agency (APHA)  | Animal and Plant Health Agency (APHA)               |                                                                                           |
| EP123046 | NP | United Kingdom | 2022-Dec-20 | EP_18_16574488 | A/chicken/England/171595/2022              | Animal and Plant Health Agency (APHA)  | Animal and Plant Health Agency (APHA)               |                                                                                           |
| EP123047 | NS | United Kingdom | 2022-Dec-20 | EP_18_16574488 | A/chicken/England/171595/2022              | Animal and Plant Health Agency (APHA)  | Animal and Plant Health Agency (APHA)               |                                                                                           |
| EP123048 | MP | United Kingdom | 2022-Dec-20 | EP_18_16574488 | A/chicken/England/171595/2022              | Animal and Plant Health Agency (APHA)  | Animal and Plant Health Agency (APHA)               |                                                                                           |
| EP123049 | NP | United Kingdom | 2022-Dec-21 | EP_18_16574500 | A/hamestei_goose/Scotland/171700/2022      | Animal and Plant Health Agency (APHA)  | Animal and Plant Health Agency (APHA)               |                                                                                           |
| EP123050 | NS | United Kingdom | 2022-Dec-21 | EP_18_16574500 | A/hamestei_goose/Scotland/171700/2022      | Animal and Plant Health Agency (APHA)  | Animal and Plant Health Agency (APHA)               |                                                                                           |
| EP123051 | MP | United Kingdom | 2022-Dec-21 | EP_18_16574500 | A/hamestei_goose/Scotland/171700/2022      | Animal and Plant Health Agency (APHA)  | Animal and Plant Health Agency (APHA)               |                                                                                           |
| EP123052 | NP | United Kingdom | 2022-Dec-21 | EP_18_16574507 | A/chicken/England/172702/2022              | Animal and Plant Health Agency (APHA)  | Animal and Plant Health Agency (APHA)               |                                                                                           |
| EP123053 | NS | United Kingdom | 2022-Dec-21 | EP_18_16574507 | A/chicken/England/172702/2022              | Animal and Plant Health Agency (APHA)  | Animal and Plant Health Agency (APHA)               |                                                                                           |
| EP123054 | MP | United Kingdom | 2022-Dec-21 | EP_18_16574507 | A/chicken/England/172702/2022              | Animal and Plant Health Agency (APHA)  | Animal and Plant Health Agency (APHA)               |                                                                                           |
| EP123055 | NP | United Kingdom | 2022-Dec-23 | EP_18_16574529 | A/chicken/hls_of_Mex/172945/2022           | Animal and Plant Health Agency (APHA)  | Animal and Plant Health Agency (APHA)               |                                                                                           |
| EP123056 | NS | United Kingdom | 2022-Dec-23 | EP_18_16574529 | A/chicken/hls_of_Mex/172945/2022           | Animal and Plant Health Agency (APHA)  | Animal and Plant Health Agency (APHA)               |                                                                                           |
| EP123057 | MP | United Kingdom | 2022-Dec-23 | EP_18_16574529 | A/chicken/hls_of_Mex/172945/2022           | Animal and Plant Health Agency (APHA)  | Animal and Plant Health Agency (APHA)               |                                                                                           |
| EP123058 | NP | Isle of Man    | 2022-Dec-26 | EP_18_16574529 | A/chicken/hls_of_Mex/172945/2022           | Animal and Plant Health Agency (APHA)  | Animal and Plant Health Agency (APHA)               |                                                                                           |
| EP123059 | NS | Isle of Man    | 2022-Dec-26 | EP_18_16574529 | A/chicken/hls_of_Mex/172945/2022           | Animal and Plant Health Agency (APHA)  | Animal and Plant Health Agency (APHA)               |                                                                                           |
| EP123060 | MP | Isle of Man    | 2022-Dec-26 | EP_18_16574529 | A/chicken/hls_of_Mex/172945/2022           | Animal and Plant Health Agency (APHA)  | Animal and Plant Health Agency (APHA)               |                                                                                           |
| EP123061 | NP | United Kingdom | 2022-Dec-21 | EP_18_16574544 | A/white-fronted_goose/Scotland/173468/2022 | Animal and Plant Health Agency (APHA)  | Animal and Plant Health Agency (APHA)               |                                                                                           |
| EP123062 | NS | United Kingdom | 2022-Dec-21 | EP_18_16574544 | A/white-fronted_goose/Scotland/173468/2022 | Animal and Plant Health Agency (APHA)  | Animal and Plant Health Agency (APHA)               |                                                                                           |
| EP123063 | MP | United Kingdom | 2022-Dec-21 | EP_18_16574544 | A/white-fronted_goose/Scotland/173468/2022 | Animal and Plant Health Agency (APHA)  | Animal and Plant Health Agency (APHA)               |                                                                                           |
| EP123064 | NP | United Kingdom | 2022-Dec-28 | EP_18_16574556 | A/chicken/Scotland/173833/2022             | Animal and Plant Health Agency (APHA)  | Animal and Plant Health Agency (APHA)               |                                                                                           |
| EP123065 | NS | United Kingdom | 2022-Dec-28 | EP_18_16574556 | A/chicken/Scotland/173833/2022             | Animal and Plant Health Agency (APHA)  | Animal and Plant Health Agency (APHA)               |                                                                                           |
| EP123066 | MP | United Kingdom | 2022-Dec-28 | EP_18_16574556 | A/chicken/Scotland/173833/2022             | Animal and Plant Health Agency (APHA)  | Animal and Plant Health Agency (APHA)               |                                                                                           |
| EP123067 | NP | United Kingdom | 2022-Dec-29 | EP_18_16574569 | A/chicken/England/175137/2022              | Animal and Plant Health Agency (APHA)  | Animal and Plant Health Agency (APHA)               |                                                                                           |
| EP123068 | NS | United Kingdom | 2022-Dec-29 | EP_18_16574569 | A/chicken/England/175137/2022              | Animal and Plant Health Agency (APHA)  | Animal and Plant Health Agency (APHA)               |                                                                                           |
| EP123069 | MP | United Kingdom | 2022-Dec-29 | EP_18_16574569 | A/chicken/England/175137/2022              | Animal and Plant Health Agency (APHA)  | Animal and Plant Health Agency (APHA)               |                                                                                           |
| EP123070 | NP | United Kingdom | 2022-Dec-12 | EP_18_16574586 | A/common_buzzard/England/255858/2022       | Animal and Plant Health Agency (APHA)  | Animal and Plant Health Agency (APHA)               |                                                                                           |
| EP123071 | NS | United Kingdom | 2022-Dec-12 | EP_18_16574586 | A/common_buzzard/England/255858/2022       | Animal and Plant Health Agency (APHA)  | Animal and Plant Health Agency (APHA)               |                                                                                           |
| EP123072 | MP | United Kingdom | 2022-Dec-12 | EP_18_16574586 | A/common_buzzard/England/255858/2022       | Animal and Plant Health Agency (APHA)  | Animal and Plant Health Agency (APHA)               |                                                                                           |
| EP123073 | NP | United Kingdom | 2022-Dec-07 | EP_18_16574599 | A/mute_wren/England/139883/2022            | Animal and Plant Health Agency (APHA)  | Animal and Plant Health Agency (APHA)               |                                                                                           |
| EP123074 | NS | United Kingdom | 2022-Dec-07 | EP_18_16574599 | A/mute_wren/England/139883/2022            | Animal and Plant Health Agency (APHA)  | Animal and Plant Health Agency (APHA)               |                                                                                           |
| EP123075 | MP | United Kingdom | 2022-Dec-07 | EP_18_16574599 | A/mute_wren/England/139883/2022            | Animal and Plant Health Agency (APHA)  | Animal and Plant Health Agency (APHA)               |                                                                                           |





|           |    |         |             |                |                                                         |                                        |                                                                |                                                                                                |
|-----------|----|---------|-------------|----------------|---------------------------------------------------------|----------------------------------------|----------------------------------------------------------------|------------------------------------------------------------------------------------------------|
| EP123485  | NP | Belgium | 2022-Sep-16 | EP_16_16876487 | A/Cyprus_pilot/Belgium/02811-0001/2022                  | Scenarios - Animal Infectious Diseases | Scenarios, Department of Animal Infectious Diseases            | Van Borm, Steven; Rogiers, Virginie; Heintjens, Pierre; Lambrecht, Benedicte; Steenwals, Meike |
| EP123488  | MP | Belgium | 2022-Dec-21 | EP_16_16876489 | A/Anas_platyrhynchos_domesticus/Belgium/24735-0001/2022 | Scenarios - Animal Infectious Diseases | Scenarios, Department of Animal Infectious Diseases            | Van Borm, Steven; Rogiers, Virginie; Heintjens, Pierre; Lambrecht, Benedicte; Steenwals, Meike |
| EP123484  | NS | Belgium | 2022-Dec-21 | EP_16_16876489 | A/Anas_platyrhynchos_domesticus/Belgium/24735-0001/2022 | Scenarios - Animal Infectious Diseases | Scenarios, Department of Animal Infectious Diseases            | Van Borm, Steven; Rogiers, Virginie; Heintjens, Pierre; Lambrecht, Benedicte; Steenwals, Meike |
| EP123481  | NP | Belgium | 2022-Dec-21 | EP_16_16876489 | A/Anas_platyrhynchos_domesticus/Belgium/24735-0001/2022 | Scenarios - Animal Infectious Diseases | Scenarios, Department of Animal Infectious Diseases            | Van Borm, Steven; Rogiers, Virginie; Heintjens, Pierre; Lambrecht, Benedicte; Steenwals, Meike |
| EP1235487 | NS | France  | 2022-Dec-10 | EP_16_16740903 | A/black/france/22P025647/2022                           | Anses (Poufregan-Rouzenn)              | ANSES Agence Nationale De Securite Sanitaire De L'alimentation |                                                                                                |
| EP1235484 | NP | France  | 2022-Dec-10 | EP_16_16740903 | A/black/france/22P025647/2022                           | Anses (Poufregan-Rouzenn)              | ANSES Agence Nationale De Securite Sanitaire De L'alimentation |                                                                                                |
| EP1235486 | MP | France  | 2022-Dec-10 | EP_16_16740903 | A/black/france/22P025647/2022                           | Anses (Poufregan-Rouzenn)              | ANSES Agence Nationale De Securite Sanitaire De L'alimentation |                                                                                                |
| EP1235492 | NP | France  | 2022-Dec-01 | EP_16_16740904 | A/black/france/22P024501/2022                           | Anses (Poufregan-Rouzenn)              | ANSES Agence Nationale De Securite Sanitaire De L'alimentation |                                                                                                |
| EP1235494 | MP | France  | 2022-Dec-01 | EP_16_16740904 | A/black/france/22P024501/2022                           | Anses (Poufregan-Rouzenn)              | ANSES Agence Nationale De Securite Sanitaire De L'alimentation |                                                                                                |
| EP1235495 | NS | France  | 2022-Dec-01 | EP_16_16740904 | A/black/france/22P024501/2022                           | Anses (Poufregan-Rouzenn)              | ANSES Agence Nationale De Securite Sanitaire De L'alimentation |                                                                                                |
| EP1235503 | NS | France  | 2022-Dec-01 | EP_16_16740905 | A/black/france/22P024657/2022                           | Anses (Poufregan-Rouzenn)              | ANSES Agence Nationale De Securite Sanitaire De L'alimentation |                                                                                                |
| EP1235500 | NP | France  | 2022-Dec-01 | EP_16_16740905 | A/black/france/22P024657/2022                           | Anses (Poufregan-Rouzenn)              | ANSES Agence Nationale De Securite Sanitaire De L'alimentation |                                                                                                |
| EP1235502 | MP | France  | 2022-Dec-01 | EP_16_16740905 | A/black/france/22P024657/2022                           | Anses (Poufregan-Rouzenn)              | ANSES Agence Nationale De Securite Sanitaire De L'alimentation |                                                                                                |
| EP1235511 | NS | France  | 2022-Dec-03 | EP_16_16741081 | A/black/france/22P024701/2022                           | Anses (Poufregan-Rouzenn)              | ANSES Agence Nationale De Securite Sanitaire De L'alimentation |                                                                                                |
| EP1235508 | NP | France  | 2022-Dec-03 | EP_16_16741081 | A/black/france/22P024701/2022                           | Anses (Poufregan-Rouzenn)              | ANSES Agence Nationale De Securite Sanitaire De L'alimentation |                                                                                                |
| EP1235510 | MP | France  | 2022-Dec-03 | EP_16_16741081 | A/black/france/22P024701/2022                           | Anses (Poufregan-Rouzenn)              | ANSES Agence Nationale De Securite Sanitaire De L'alimentation |                                                                                                |
| EP1235516 | NP | France  | 2022-Dec-05 | EP_16_16741115 | A/turkey/france/22P024731/2022                          | Anses (Poufregan-Rouzenn)              | ANSES Agence Nationale De Securite Sanitaire De L'alimentation |                                                                                                |
| EP1235518 | MP | France  | 2022-Dec-05 | EP_16_16741115 | A/turkey/france/22P024731/2022                          | Anses (Poufregan-Rouzenn)              | ANSES Agence Nationale De Securite Sanitaire De L'alimentation |                                                                                                |
| EP1235519 | NS | France  | 2022-Dec-05 | EP_16_16741115 | A/turkey/france/22P024731/2022                          | Anses (Poufregan-Rouzenn)              | ANSES Agence Nationale De Securite Sanitaire De L'alimentation |                                                                                                |
| EP1235604 | NP | France  | 2022-Dec-06 | EP_16_16741201 | A/black/france/22P025078/2022                           | Anses (Poufregan-Rouzenn)              | ANSES Agence Nationale De Securite Sanitaire De L'alimentation |                                                                                                |
| EP1235641 | MP | France  | 2022-Dec-06 | EP_16_16741201 | A/black/france/22P025078/2022                           | Anses (Poufregan-Rouzenn)              | ANSES Agence Nationale De Securite Sanitaire De L'alimentation |                                                                                                |
| EP1235655 | NS | France  | 2022-Dec-06 | EP_16_16741201 | A/black/france/22P025078/2022                           | Anses (Poufregan-Rouzenn)              | ANSES Agence Nationale De Securite Sanitaire De L'alimentation |                                                                                                |
| EP1235708 | MP | France  | 2022-Dec-07 | EP_16_16741221 | A/black/france/22P025152/2022                           | Anses (Poufregan-Rouzenn)              | ANSES Agence Nationale De Securite Sanitaire De L'alimentation |                                                                                                |
| EP1235709 | NS | France  | 2022-Dec-07 | EP_16_16741221 | A/black/france/22P025152/2022                           | Anses (Poufregan-Rouzenn)              | ANSES Agence Nationale De Securite Sanitaire De L'alimentation |                                                                                                |
| EP1235706 | NP | France  | 2022-Dec-07 | EP_16_16741221 | A/black/france/22P025152/2022                           | Anses (Poufregan-Rouzenn)              | ANSES Agence Nationale De Securite Sanitaire De L'alimentation |                                                                                                |
| EP1235718 | NS | France  | 2022-Dec-05 | EP_16_16741225 | A/black/france/22P025303/2022                           | Anses (Poufregan-Rouzenn)              | ANSES Agence Nationale De Securite Sanitaire De L'alimentation |                                                                                                |
| EP1235717 | MP | France  | 2022-Dec-05 | EP_16_16741225 | A/black/france/22P025303/2022                           | Anses (Poufregan-Rouzenn)              | ANSES Agence Nationale De Securite Sanitaire De L'alimentation |                                                                                                |
| EP1235715 | NP | France  | 2022-Dec-05 | EP_16_16741225 | A/black/france/22P025303/2022                           | Anses (Poufregan-Rouzenn)              | ANSES Agence Nationale De Securite Sanitaire De L'alimentation |                                                                                                |
| EP1235725 | MP | France  | 2022-Dec-09 | EP_16_16741226 | A/chicken/france/22P025486/2022                         | Anses (Poufregan-Rouzenn)              | ANSES Agence Nationale De Securite Sanitaire De L'alimentation |                                                                                                |
| EP1235726 | NS | France  | 2022-Dec-09 | EP_16_16741226 | A/chicken/france/22P025486/2022                         | Anses (Poufregan-Rouzenn)              | ANSES Agence Nationale De Securite Sanitaire De L'alimentation |                                                                                                |
| EP1235723 | NP | France  | 2022-Dec-09 | EP_16_16741226 | A/chicken/france/22P025486/2022                         | Anses (Poufregan-Rouzenn)              | ANSES Agence Nationale De Securite Sanitaire De L'alimentation |                                                                                                |
| EP1235827 | NP | France  | 2022-Dec-10 | EP_16_16741402 | A/black/france/22P025498/2022                           | Anses (Poufregan-Rouzenn)              | ANSES Agence Nationale De Securite Sanitaire De L'alimentation |                                                                                                |
| EP1235830 | NS | France  | 2022-Dec-10 | EP_16_16741402 | A/black/france/22P025498/2022                           | Anses (Poufregan-Rouzenn)              | ANSES Agence Nationale De Securite Sanitaire De L'alimentation |                                                                                                |
| EP1235829 | MP | France  | 2022-Dec-10 | EP_16_16741402 | A/black/france/22P025498/2022                           | Anses (Poufregan-Rouzenn)              | ANSES Agence Nationale De Securite Sanitaire De L'alimentation |                                                                                                |
| EP1231817 | MP | Belgium | 2022-Jan-05 | EP_16_16747692 | A/buteo_burinus/Belgium/00331-0007/2022                 | Scenarios - Animal Infectious Diseases | Scenarios, Department of Animal Infectious Diseases            | Van Borm, Steven; Rogiers, Virginie; Heintjens, Pierre; Lambrecht, Benedicte; Steenwals, Meike |

|           |    |                |             |                |                                                 |                                                     |                                                     |                                                                                                          |
|-----------|----|----------------|-------------|----------------|-------------------------------------------------|-----------------------------------------------------|-----------------------------------------------------|----------------------------------------------------------------------------------------------------------|
| EP232825  | NP | Belgium        | 2022-Jan-03 | EP_10_16747602 | A/Buteo_buteo/Belgium/00331-0007/2022           | Sciensano - Animal Infectious Diseases              | Sciensano, Department of Animal Infectious Diseases | Van Born, Steven; Rouspis, Virginie; Heintyn, Pierre; Lambrecht, Benedicte; Steenhuys, Meike             |
| EP232839  | NS | Belgium        | 2022-Jan-03 | EP_10_16747602 | A/Buteo_buteo/Belgium/00331-0007/2022           | Sciensano - Animal Infectious Diseases              | Sciensano, Department of Animal Infectious Diseases | Van Born, Steven; Rouspis, Virginie; Heintyn, Pierre; Lambrecht, Benedicte; Steenhuys, Meike             |
| EP2334786 | MP | Belgium        | 2022-Aug-18 | EP_10_16748778 | A/HyVhuu_fulgula/Belgium/10064-0004/2022        | Sciensano - Animal Infectious Diseases              | Sciensano, Department of Animal Infectious Diseases | Van Born, Steven; Rouspis, Virginie; Heintyn, Pierre; Lambrecht, Benedicte; Steenhuys, Meike             |
| EP2334841 | NS | Belgium        | 2022-Aug-18 | EP_10_16748778 | A/HyVhuu_fulgula/Belgium/10064-0004/2022        | Sciensano - Animal Infectious Diseases              | Sciensano, Department of Animal Infectious Diseases | Van Born, Steven; Rouspis, Virginie; Heintyn, Pierre; Lambrecht, Benedicte; Steenhuys, Meike             |
| EP2334740 | NP | Belgium        | 2022-Aug-18 | EP_10_16748778 | A/HyVhuu_fulgula/Belgium/10064-0004/2022        | Sciensano - Animal Infectious Diseases              | Sciensano, Department of Animal Infectious Diseases | Van Born, Steven; Rouspis, Virginie; Heintyn, Pierre; Lambrecht, Benedicte; Steenhuys, Meike             |
| EP2335413 | MP | Belgium        | 2022-Oct-10 | EP_10_16748957 | A/Corvus_mormonula/Belgium/11918_0006/2022      | Sciensano, Department of Animal Infectious Diseases | Sciensano, Department of Animal Infectious Diseases | Van Born, Steven; Rouspis, Virginie; Heintyn, Pierre; Lambrecht, Benedicte; Steenhuys, Meike             |
| EP2335411 | NP | Belgium        | 2022-Oct-10 | EP_10_16748957 | A/Corvus_mormonula/Belgium/11918_0006/2022      | Sciensano, Department of Animal Infectious Diseases | Sciensano, Department of Animal Infectious Diseases | Van Born, Steven; Rouspis, Virginie; Heintyn, Pierre; Lambrecht, Benedicte; Steenhuys, Meike             |
| EP2335414 | NS | Belgium        | 2022-Oct-10 | EP_10_16748957 | A/Corvus_mormonula/Belgium/11918_0006/2022      | Sciensano, Department of Animal Infectious Diseases | Sciensano, Department of Animal Infectious Diseases | Van Born, Steven; Rouspis, Virginie; Heintyn, Pierre; Lambrecht, Benedicte; Steenhuys, Meike             |
| EP2335344 | NP | Belgium        | 2022-Nov-02 | EP_10_16809999 | A/Anseranser_domesticus/Belgium/12384_0002/2022 | Sciensano - Animal Infectious Diseases              | Sciensano, Department of Animal Infectious Diseases | Van Born, Steven; Rouspis, Virginie; Heintyn, Pierre; Lambrecht, Benedicte; Steenhuys, Meike             |
| EP2335347 | NS | Belgium        | 2022-Nov-02 | EP_10_16809999 | A/Anseranser_domesticus/Belgium/12384_0002/2022 | Sciensano - Animal Infectious Diseases              | Sciensano, Department of Animal Infectious Diseases | Van Born, Steven; Rouspis, Virginie; Heintyn, Pierre; Lambrecht, Benedicte; Steenhuys, Meike             |
| EP2335346 | MP | Belgium        | 2022-Nov-02 | EP_10_16809999 | A/Anseranser_domesticus/Belgium/12384_0002/2022 | Sciensano - Animal Infectious Diseases              | Sciensano, Department of Animal Infectious Diseases | Van Born, Steven; Rouspis, Virginie; Heintyn, Pierre; Lambrecht, Benedicte; Steenhuys, Meike             |
| EP2335143 | NP | Belgium        | 2022-Sep-10 | EP_10_16810069 | A/Morus_basarnus/Belgium/10811_0001/2022        | Sciensano - Animal Infectious Diseases              | Sciensano, Department of Animal Infectious Diseases | Van Born, Steven; Rouspis, Virginie; Heintyn, Pierre; Lambrecht, Benedicte; Steenhuys, Meike             |
| EP2335144 | NS | Belgium        | 2022-Sep-10 | EP_10_16810069 | A/Morus_basarnus/Belgium/10811_0001/2022        | Sciensano - Animal Infectious Diseases              | Sciensano, Department of Animal Infectious Diseases | Van Born, Steven; Rouspis, Virginie; Heintyn, Pierre; Lambrecht, Benedicte; Steenhuys, Meike             |
| EP2335141 | MP | Belgium        | 2022-Sep-10 | EP_10_16810069 | A/Morus_basarnus/Belgium/10811_0001/2022        | Sciensano - Animal Infectious Diseases              | Sciensano, Department of Animal Infectious Diseases | Van Born, Steven; Rouspis, Virginie; Heintyn, Pierre; Lambrecht, Benedicte; Steenhuys, Meike             |
| EP2335143 | MP | Belgium        | 2022-Sep-07 | EP_10_16810105 | A/Larus_argentatus/Belgium/10811_0002/2022      | Sciensano - Animal Infectious Diseases              | Sciensano, Department of Animal Infectious Diseases | Van Born, Steven; Rouspis, Virginie; Heintyn, Pierre; Lambrecht, Benedicte; Steenhuys, Meike             |
| EP2335140 | NP | Belgium        | 2022-Sep-07 | EP_10_16810105 | A/Larus_argentatus/Belgium/10811_0002/2022      | Sciensano - Animal Infectious Diseases              | Sciensano, Department of Animal Infectious Diseases | Van Born, Steven; Rouspis, Virginie; Heintyn, Pierre; Lambrecht, Benedicte; Steenhuys, Meike             |
| EP2335143 | NS | Belgium        | 2022-Sep-07 | EP_10_16810105 | A/Larus_argentatus/Belgium/10811_0002/2022      | Sciensano - Animal Infectious Diseases              | Sciensano, Department of Animal Infectious Diseases | Van Born, Steven; Rouspis, Virginie; Heintyn, Pierre; Lambrecht, Benedicte; Steenhuys, Meike             |
| EP2335140 | NP | Belgium        | 2022-Aug-30 | EP_10_16810562 | A/Mixed_wild_birds/Belgium/10368_0001/2022      | Sciensano - Animal Infectious Diseases              | Sciensano, Department of Animal Infectious Diseases | Van Born, Steven; Rouspis, Virginie; Heintyn, Pierre; Lambrecht, Benedicte; Steenhuys, Meike             |
| EP2335141 | MP | Belgium        | 2022-Aug-30 | EP_10_16810562 | A/Mixed_wild_birds/Belgium/10368_0001/2022      | Sciensano - Animal Infectious Diseases              | Sciensano, Department of Animal Infectious Diseases | Van Born, Steven; Rouspis, Virginie; Heintyn, Pierre; Lambrecht, Benedicte; Steenhuys, Meike             |
| EP2335142 | NS | Belgium        | 2022-Aug-30 | EP_10_16810562 | A/Mixed_wild_birds/Belgium/10368_0001/2022      | Sciensano - Animal Infectious Diseases              | Sciensano, Department of Animal Infectious Diseases | Van Born, Steven; Rouspis, Virginie; Heintyn, Pierre; Lambrecht, Benedicte; Steenhuys, Meike             |
| EP2335149 | MP | Belgium        | 2022-Jul-18 | EP_10_16810698 | A/Bubo_bubo/Belgium/09467_0001/2022             | Sciensano - Animal Infectious Diseases              | Sciensano, Department of Animal Infectious Diseases | Van Born, Steven; Rouspis, Virginie; Heintyn, Pierre; Lambrecht, Benedicte; Steenhuys, Meike             |
| EP2335150 | NS | Belgium        | 2022-Jul-18 | EP_10_16810698 | A/Bubo_bubo/Belgium/09467_0001/2022             | Sciensano - Animal Infectious Diseases              | Sciensano, Department of Animal Infectious Diseases | Van Born, Steven; Rouspis, Virginie; Heintyn, Pierre; Lambrecht, Benedicte; Steenhuys, Meike             |
| EP2335147 | NP | Belgium        | 2022-Jul-18 | EP_10_16810698 | A/Bubo_bubo/Belgium/09467_0001/2022             | Sciensano - Animal Infectious Diseases              | Sciensano, Department of Animal Infectious Diseases | Van Born, Steven; Rouspis, Virginie; Heintyn, Pierre; Lambrecht, Benedicte; Steenhuys, Meike             |
| EP2325217 | NP | Netherlands    | 2022-Dec-31 | EP_10_16811039 | A/Perognis_falson/Netherlands/1/2022            | Erasmus Medical Center                              | Erasmus Medical Center                              |                                                                                                          |
| EP2325218 | NS | Netherlands    | 2022-Dec-31 | EP_10_16811039 | A/Perognis_falson/Netherlands/1/2022            | Erasmus Medical Center                              | Erasmus Medical Center                              |                                                                                                          |
| EP2325219 | MP | Netherlands    | 2022-Dec-31 | EP_10_16811039 | A/Perognis_falson/Netherlands/1/2022            | Erasmus Medical Center                              | Erasmus Medical Center                              |                                                                                                          |
| EP2325201 | NP | United Kingdom | 2022-Dec-30 | EP_10_16811199 | A/Mute_Swan/England/120899/2022                 | Animal and Plant Health Agency (APHA)               | Animal and Plant Health Agency (APHA)               |                                                                                                          |
| EP2325203 | NS | United Kingdom | 2022-Dec-30 | EP_10_16811199 | A/Mute_Swan/England/120899/2022                 | Animal and Plant Health Agency (APHA)               | Animal and Plant Health Agency (APHA)               |                                                                                                          |
| EP2325205 | MP | United Kingdom | 2022-Dec-30 | EP_10_16811199 | A/Mute_Swan/England/120899/2022                 | Animal and Plant Health Agency (APHA)               | Animal and Plant Health Agency (APHA)               |                                                                                                          |
| EP2325207 | NP | United Kingdom | 2022-Dec-30 | EP_10_16811201 | A/Greyling_Goswain/England/120999/2022          | Animal and Plant Health Agency (APHA)               | Animal and Plant Health Agency (APHA)               |                                                                                                          |
| EP2325209 | NS | United Kingdom | 2022-Dec-30 | EP_10_16811201 | A/Greyling_Goswain/England/120999/2022          | Animal and Plant Health Agency (APHA)               | Animal and Plant Health Agency (APHA)               |                                                                                                          |
| EP2325211 | MP | United Kingdom | 2022-Dec-30 | EP_10_16811201 | A/Greyling_Goswain/England/120999/2022          | Animal and Plant Health Agency (APHA)               | Animal and Plant Health Agency (APHA)               |                                                                                                          |
| EP2325292 | NP | Spain          | 2022-Oct-13 | EP_10_16813290 | A/CasillalaaMancha/3869/2022                    | Instituto de Salud Carlos III                       | Instituto de Salud Carlos III                       | Perez F, Iglesias-Caballero, M, Molero, M, Camarero, S, Marín, V, Reyes, N, Viquez-Morales, C, Casas, J. |
| EP2325293 | NS | Spain          | 2022-Oct-13 | EP_10_16813290 | A/CasillalaaMancha/3869/2022                    | Instituto de Salud Carlos III                       | Instituto de Salud Carlos III                       | Perez F, Iglesias-Caballero, M, Molero, M, Camarero, S, Marín, V, Reyes, N, Viquez-Morales, C, Casas, J. |
| EP2325294 | MP | Spain          | 2022-Oct-13 | EP_10_16813290 | A/CasillalaaMancha/3869/2022                    | Instituto de Salud Carlos III                       | Instituto de Salud Carlos III                       | Perez F, Iglesias-Caballero, M, Molero, M, Camarero, S, Marín, V, Reyes, N, Viquez-Morales, C, Casas, J. |

|           |    |                |             |                |                                                    |                                                                                                                         |                                                     |                                                                                                                  |
|-----------|----|----------------|-------------|----------------|----------------------------------------------------|-------------------------------------------------------------------------------------------------------------------------|-----------------------------------------------------|------------------------------------------------------------------------------------------------------------------|
| EP2298173 | NS | United Kingdom | 2022-Nov-11 | EP_18_16904500 | A/Turkey/England/150207/2022                       | Animal and Plant Health Agency (APHA)                                                                                   | Animal and Plant Health Agency (APHA)               |                                                                                                                  |
| EP2298174 | MP | United Kingdom | 2022-Nov-11 | EP_18_16904500 | A/Turkey/England/150207/2022                       | Animal and Plant Health Agency (APHA)                                                                                   | Animal and Plant Health Agency (APHA)               |                                                                                                                  |
| EP2298172 | NP | United Kingdom | 2022-Nov-11 | EP_18_16904500 | A/Turkey/England/150207/2022                       | Animal and Plant Health Agency (APHA)                                                                                   | Animal and Plant Health Agency (APHA)               |                                                                                                                  |
| EP2298180 | NP | United Kingdom | 2022-Dec-17 | EP_18_16904501 | A/Chicken/Scotland/170118/2022                     | Animal and Plant Health Agency (APHA)                                                                                   | Animal and Plant Health Agency (APHA)               |                                                                                                                  |
| EP2298181 | NS | United Kingdom | 2022-Dec-17 | EP_18_16904501 | A/Chicken/Scotland/170118/2022                     | Animal and Plant Health Agency (APHA)                                                                                   | Animal and Plant Health Agency (APHA)               |                                                                                                                  |
| EP2298182 | MP | United Kingdom | 2022-Dec-17 | EP_18_16904501 | A/Chicken/Scotland/170118/2022                     | Animal and Plant Health Agency (APHA)                                                                                   | Animal and Plant Health Agency (APHA)               |                                                                                                                  |
| EP2298188 | NP | United Kingdom | 2022-Dec-14 | EP_18_16904502 | A/Chicken/Scotland/170521/2022                     | Animal and Plant Health Agency (APHA)                                                                                   | Animal and Plant Health Agency (APHA)               |                                                                                                                  |
| EP2298189 | NS | United Kingdom | 2022-Dec-14 | EP_18_16904502 | A/Chicken/Scotland/170521/2022                     | Animal and Plant Health Agency (APHA)                                                                                   | Animal and Plant Health Agency (APHA)               |                                                                                                                  |
| EP2298190 | MP | United Kingdom | 2022-Dec-14 | EP_18_16904502 | A/Chicken/Scotland/170521/2022                     | Animal and Plant Health Agency (APHA)                                                                                   | Animal and Plant Health Agency (APHA)               |                                                                                                                  |
| EP2298197 | NS | United Kingdom | 2022-Mar-12 | EP_18_16904503 | A/Harbour_Seal/Scotland/142919/2022                | Animal and Plant Health Agency (APHA)                                                                                   | Animal and Plant Health Agency (APHA)               |                                                                                                                  |
| EP2298198 | MP | United Kingdom | 2022-Mar-12 | EP_18_16904503 | A/Harbour_Seal/Scotland/142919/2022                | Animal and Plant Health Agency (APHA)                                                                                   | Animal and Plant Health Agency (APHA)               |                                                                                                                  |
| EP2298196 | NP | United Kingdom | 2022-Mar-12 | EP_18_16904503 | A/Harbour_Seal/Scotland/142919/2022                | Animal and Plant Health Agency (APHA)                                                                                   | Animal and Plant Health Agency (APHA)               |                                                                                                                  |
| EP2415011 | NP | Italy          | 2022-Dec-30 | EP_18_16979817 | A/Black-headed_gull/Italy/23/915107-4/2022         | Istituto Zooprofilattico Sperimentale della Venezia, EU/OIE/Reference Laboratory and FAO Reference Centre for AI and ND | Istituto Zooprofilattico Sperimentale Della Venezia |                                                                                                                  |
| EP2414987 | NS | Italy          | 2022-Dec-30 | EP_18_16979817 | A/Black-headed_gull/Italy/23/915107-4/2022         | Istituto Zooprofilattico Sperimentale della Venezia, EU/OIE/Reference Laboratory and FAO Reference Centre for AI and ND | Istituto Zooprofilattico Sperimentale Della Venezia |                                                                                                                  |
| EP2414988 | MP | Italy          | 2022-Dec-30 | EP_18_16979817 | A/Black-headed_gull/Italy/23/915107-4/2022         | Istituto Zooprofilattico Sperimentale della Venezia, EU/OIE/Reference Laboratory and FAO Reference Centre for AI and ND | Istituto Zooprofilattico Sperimentale Della Venezia |                                                                                                                  |
| EP2415154 | NP | Belgium        | 2022-Dec-28 | EP_18_16984685 | A/Chroicocephalus_nibuniku/Belgium/00131_0002/2022 | Sciensano - Animal Infectious Diseases                                                                                  | Sciensano, Department of Animal Infectious Diseases | Van Born, Steven; Rouspis, Virginie; Heintyn, Pierre; Lambrecht, Benedicte; Steensels, Mieke                     |
| EP2415157 | NS | Belgium        | 2022-Dec-28 | EP_18_16984685 | A/Chroicocephalus_nibuniku/Belgium/00131_0002/2022 | Sciensano - Animal Infectious Diseases                                                                                  | Sciensano, Department of Animal Infectious Diseases | Van Born, Steven; Rouspis, Virginie; Heintyn, Pierre; Lambrecht, Benedicte; Steensels, Mieke                     |
| EP2415156 | MP | Belgium        | 2022-Dec-28 | EP_18_16984685 | A/Chroicocephalus_nibuniku/Belgium/00131_0002/2022 | Sciensano - Animal Infectious Diseases                                                                                  | Sciensano, Department of Animal Infectious Diseases | Van Born, Steven; Rouspis, Virginie; Heintyn, Pierre; Lambrecht, Benedicte; Steensels, Mieke                     |
| EP2415401 | MP | Belgium        | 2022-Dec-15 | EP_18_16984689 | A/Anser_brachyrynchos/Belgium/24776_0001/2022      | Sciensano - Animal Infectious Diseases                                                                                  | Sciensano, Department of Animal Infectious Diseases | Van Born, Steven; Rouspis, Virginie; Heintyn, Pierre; Lambrecht, Benedicte; Steensels, Mieke                     |
| EP2415402 | NS | Belgium        | 2022-Dec-15 | EP_18_16984689 | A/Anser_brachyrynchos/Belgium/24776_0001/2022      | Sciensano - Animal Infectious Diseases                                                                                  | Sciensano, Department of Animal Infectious Diseases | Van Born, Steven; Rouspis, Virginie; Heintyn, Pierre; Lambrecht, Benedicte; Steensels, Mieke                     |
| EP2415399 | NP | Belgium        | 2022-Dec-15 | EP_18_16984689 | A/Anser_brachyrynchos/Belgium/24776_0001/2022      | Sciensano - Animal Infectious Diseases                                                                                  | Sciensano, Department of Animal Infectious Diseases | Van Born, Steven; Rouspis, Virginie; Heintyn, Pierre; Lambrecht, Benedicte; Steensels, Mieke                     |
| EP2415411 | NS | Belgium        | 2022-Aug-29 | EP_18_16984678 | A/Brantha_sandensis/Belgium/20098_0003/2022        | Sciensano - Animal Infectious Diseases                                                                                  | Sciensano, Department of Animal Infectious Diseases | Van Born, Steven; Rouspis, Virginie; Heintyn, Pierre; Lambrecht, Benedicte; Steensels, Mieke                     |
| EP2415408 | NP | Belgium        | 2022-Aug-29 | EP_18_16984678 | A/Brantha_sandensis/Belgium/20098_0003/2022        | Sciensano - Animal Infectious Diseases                                                                                  | Sciensano, Department of Animal Infectious Diseases | Van Born, Steven; Rouspis, Virginie; Heintyn, Pierre; Lambrecht, Benedicte; Steensels, Mieke                     |
| EP2415410 | MP | Belgium        | 2022-Aug-29 | EP_18_16984678 | A/Brantha_sandensis/Belgium/20098_0003/2022        | Sciensano - Animal Infectious Diseases                                                                                  | Sciensano, Department of Animal Infectious Diseases | Van Born, Steven; Rouspis, Virginie; Heintyn, Pierre; Lambrecht, Benedicte; Steensels, Mieke                     |
| EP2415416 | NP | Belgium        | 2022-Dec-14 | EP_18_16985112 | A/Melospiza_galopavina/Belgium/14826_0002/2022     | Sciensano - Animal Infectious Diseases                                                                                  | Sciensano, Department of Animal Infectious Diseases | Van Born, Steven; Rouspis, Virginie; Heintyn, Pierre; Lambrecht, Benedicte; Steensels, Mieke                     |
| EP2415418 | MP | Belgium        | 2022-Dec-14 | EP_18_16985112 | A/Melospiza_galopavina/Belgium/14826_0002/2022     | Sciensano - Animal Infectious Diseases                                                                                  | Sciensano, Department of Animal Infectious Diseases | Van Born, Steven; Rouspis, Virginie; Heintyn, Pierre; Lambrecht, Benedicte; Steensels, Mieke                     |
| EP2415419 | NS | Belgium        | 2022-Dec-14 | EP_18_16985112 | A/Melospiza_galopavina/Belgium/14826_0002/2022     | Sciensano - Animal Infectious Diseases                                                                                  | Sciensano, Department of Animal Infectious Diseases | Van Born, Steven; Rouspis, Virginie; Heintyn, Pierre; Lambrecht, Benedicte; Steensels, Mieke                     |
| EP2436846 | NS | Belgium        | 2022-Aug-28 | EP_18_17071430 | A/Brantha_sandensis/Belgium/20093_0002/2022        | Sciensano - Animal Infectious Diseases                                                                                  | Sciensano, Department of Animal Infectious Diseases | Van Born, Steven; Rouspis, Virginie; Heintyn, Pierre; Mathijs, Elisabeth; Lambrecht, Benedicte; Steensels, Mieke |
| EP2436844 | MP | Belgium        | 2022-Aug-28 | EP_18_17071430 | A/Brantha_sandensis/Belgium/20093_0002/2022        | Sciensano - Animal Infectious Diseases                                                                                  | Sciensano, Department of Animal Infectious Diseases | Van Born, Steven; Rouspis, Virginie; Heintyn, Pierre; Mathijs, Elisabeth; Lambrecht, Benedicte; Steensels, Mieke |
| EP2436842 | NP | Belgium        | 2022-Aug-28 | EP_18_17071430 | A/Brantha_sandensis/Belgium/20093_0002/2022        | Sciensano - Animal Infectious Diseases                                                                                  | Sciensano, Department of Animal Infectious Diseases | Van Born, Steven; Rouspis, Virginie; Heintyn, Pierre; Mathijs, Elisabeth; Lambrecht, Benedicte; Steensels, Mieke |
| EP2436895 | NS | Belgium        | 2022-Dec-18 | EP_18_17071930 | A/Anser_anser/Belgium/14804_0002/2022              | Sciensano - Animal Infectious Diseases                                                                                  | Sciensano, Department of Animal Infectious Diseases | Van Born, Steven; Rouspis, Virginie; Heintyn, Pierre; Mathijs, Elisabeth; Lambrecht, Benedicte; Steensels, Mieke |
| EP2436893 | MP | Belgium        | 2022-Dec-18 | EP_18_17071930 | A/Anser_anser/Belgium/14804_0002/2022              | Sciensano - Animal Infectious Diseases                                                                                  | Sciensano, Department of Animal Infectious Diseases | Van Born, Steven; Rouspis, Virginie; Heintyn, Pierre; Mathijs, Elisabeth; Lambrecht, Benedicte; Steensels, Mieke |
| EP2436889 | NP | Belgium        | 2022-Dec-18 | EP_18_17071930 | A/Anser_anser/Belgium/14804_0002/2022              | Sciensano - Animal Infectious Diseases                                                                                  | Sciensano, Department of Animal Infectious Diseases | Van Born, Steven; Rouspis, Virginie; Heintyn, Pierre; Mathijs, Elisabeth; Lambrecht, Benedicte; Steensels, Mieke |
| EP2437461 | NP | United Kingdom | 2022-Aug-23 | EP_18_17072388 | A/fin/England/051805/2022                          | Animal and Plant Health Agency (APHA)                                                                                   | Animal and Plant Health Agency (APHA)               |                                                                                                                  |
| EP2437462 | NS | United Kingdom | 2022-Aug-23 | EP_18_17072388 | A/fin/England/051805/2022                          | Animal and Plant Health Agency (APHA)                                                                                   | Animal and Plant Health Agency (APHA)               |                                                                                                                  |

|           |    |                |             |                |                                              |                                                                 |                                                    |                                                                                                                                                                                  |
|-----------|----|----------------|-------------|----------------|----------------------------------------------|-----------------------------------------------------------------|----------------------------------------------------|----------------------------------------------------------------------------------------------------------------------------------------------------------------------------------|
| EP247463  | MP | United Kingdom | 2022-Aug-23 | EP_15_1707288  | A/fav/England/031802/2022                    | Animal and Plant Health Agency (APHA)                           | Animal and Plant Health Agency (APHA)              |                                                                                                                                                                                  |
| EP245521  | NP | Romania        | 2022-Nov-15 | EP_15_17185500 | A/vigna_olior/Romania/17142_23/081145-1/2022 | Institute for Diagnosis & Animal Health (IDAH)                  | Istituto Zooprofilattico Sperimentale Delle Venete | Barbocanu, F., Ohita, I., Neacut, A., Motiu, R., Barliciu, R., Pastor, A., Zechin, B., Fusari, A., Schivo, A., Salekoti, A., Palumbo, E., Giovanni, E., Moroni, I., Terragno, C. |
| EP245522  | NS | Romania        | 2022-Nov-15 | EP_15_17185500 | A/vigna_olior/Romania/17142_23/081145-1/2022 | Institute for Diagnosis & Animal Health (IDAH)                  | Istituto Zooprofilattico Sperimentale Delle Venete | Barbocanu, F., Ohita, I., Neacut, A., Motiu, R., Barliciu, R., Pastor, A., Zechin, B., Fusari, A., Schivo, A., Salekoti, A., Palumbo, E., Giovanni, E., Moroni, I., Terragno, C. |
| EP245523  | MP | Romania        | 2022-Nov-15 | EP_15_17185500 | A/vigna_olior/Romania/17142_23/081145-1/2022 | Institute for Diagnosis & Animal Health (IDAH)                  | Istituto Zooprofilattico Sperimentale Delle Venete | Barbocanu, F., Ohita, I., Neacut, A., Motiu, R., Barliciu, R., Pastor, A., Zechin, B., Fusari, A., Schivo, A., Salekoti, A., Palumbo, E., Giovanni, E., Moroni, I., Terragno, C. |
| EP245529  | NP | Romania        | 2022-Nov-17 | EP_15_17185501 | A/vigna_olior/Romania/17138_23/081145-2/2022 | Institute for Diagnosis & Animal Health (IDAH)                  | Istituto Zooprofilattico Sperimentale Delle Venete | Barbocanu, F., Ohita, I., Neacut, A., Motiu, R., Barliciu, R., Pastor, A., Zechin, B., Fusari, A., Schivo, A., Salekoti, A., Palumbo, E., Giovanni, E., Moroni, I., Terragno, C. |
| EP245530  | NS | Romania        | 2022-Nov-17 | EP_15_17185501 | A/vigna_olior/Romania/17138_23/081145-2/2022 | Institute for Diagnosis & Animal Health (IDAH)                  | Istituto Zooprofilattico Sperimentale Delle Venete | Barbocanu, F., Ohita, I., Neacut, A., Motiu, R., Barliciu, R., Pastor, A., Zechin, B., Fusari, A., Schivo, A., Salekoti, A., Palumbo, E., Giovanni, E., Moroni, I., Terragno, C. |
| EP245211  | MP | Romania        | 2022-Nov-17 | EP_15_17185501 | A/vigna_olior/Romania/17138_23/081145-2/2022 | Institute for Diagnosis & Animal Health (IDAH)                  | Istituto Zooprofilattico Sperimentale Delle Venete | Barbocanu, F., Ohita, I., Neacut, A., Motiu, R., Barliciu, R., Pastor, A., Zechin, B., Fusari, A., Schivo, A., Salekoti, A., Palumbo, E., Giovanni, E., Moroni, I., Terragno, C. |
| EP2456107 | NP | Switzerland    | 2022-Nov-16 | EP_15_17179502 | A/jacovsk/Switzerland-Zurich/2211192/2022    | Nationales Referenzlabor für Geflügel- und Kaninchenkrankheiten | Institute of Virology and Immunology (IVI)         |                                                                                                                                                                                  |
| EP2456114 | NP | Switzerland    | 2022-Nov-16 | EP_15_17179502 | A/jacovsk/Switzerland-Zurich/2211192/2022    | Nationales Referenzlabor für Geflügel- und Kaninchenkrankheiten | Institute of Virology and Immunology (IVI)         |                                                                                                                                                                                  |
| EP2456116 | MP | Switzerland    | 2022-Nov-16 | EP_15_17179502 | A/jacovsk/Switzerland-Zurich/2211192/2022    | Nationales Referenzlabor für Geflügel- und Kaninchenkrankheiten | Institute of Virology and Immunology (IVI)         |                                                                                                                                                                                  |
| EP2456205 | NS | Switzerland    | 2022-Nov-22 | EP_15_17179503 | A/mute-ween/Switzerland-Ticino/2212114/2022  | Nationales Referenzlabor für Geflügel- und Kaninchenkrankheiten | Institute of Virology and Immunology (IVI)         |                                                                                                                                                                                  |
| EP2456204 | MP | Switzerland    | 2022-Nov-22 | EP_15_17179503 | A/mute-ween/Switzerland-Ticino/2212114/2022  | Nationales Referenzlabor für Geflügel- und Kaninchenkrankheiten | Institute of Virology and Immunology (IVI)         |                                                                                                                                                                                  |
| EP2456202 | NP | Switzerland    | 2022-Nov-22 | EP_15_17179503 | A/mute-ween/Switzerland-Ticino/2212114/2022  | Nationales Referenzlabor für Geflügel- und Kaninchenkrankheiten | Institute of Virology and Immunology (IVI)         |                                                                                                                                                                                  |
| EP2471829 | NP | United Kingdom | 2022-Nov-18 | EP_15_17257532 | A/bush_dig/England/037680/2022               | Animal and Plant Health Agency (APHA)                           | Animal and Plant Health Agency (APHA)              |                                                                                                                                                                                  |
| EP2471830 | NS | United Kingdom | 2022-Nov-18 | EP_15_17257532 | A/bush_dig/England/037680/2022               | Animal and Plant Health Agency (APHA)                           | Animal and Plant Health Agency (APHA)              |                                                                                                                                                                                  |
| EP2471831 | MP | United Kingdom | 2022-Nov-18 | EP_15_17257532 | A/bush_dig/England/037680/2022               | Animal and Plant Health Agency (APHA)                           | Animal and Plant Health Agency (APHA)              |                                                                                                                                                                                  |
| EP2471836 | NP | United Kingdom | 2022-Nov-14 | EP_15_17288131 | A/chickens/England/512082/2022               | Animal and Plant Health Agency (APHA)                           | Animal and Plant Health Agency (APHA)              |                                                                                                                                                                                  |
| EP2471837 | NS | United Kingdom | 2022-Nov-14 | EP_15_17288131 | A/chickens/England/512082/2022               | Animal and Plant Health Agency (APHA)                           | Animal and Plant Health Agency (APHA)              |                                                                                                                                                                                  |
| EP2471838 | MP | United Kingdom | 2022-Nov-14 | EP_15_17288131 | A/chickens/England/512082/2022               | Animal and Plant Health Agency (APHA)                           | Animal and Plant Health Agency (APHA)              |                                                                                                                                                                                  |
| EP2471894 | NP | United Kingdom | 2022-Oct-21 | EP_15_17288133 | A/canada_gross/England/284558/2022           | Animal and Plant Health Agency (APHA)                           | Animal and Plant Health Agency (APHA)              |                                                                                                                                                                                  |
| EP2471895 | NS | United Kingdom | 2022-Oct-21 | EP_15_17288133 | A/canada_gross/England/284558/2022           | Animal and Plant Health Agency (APHA)                           | Animal and Plant Health Agency (APHA)              |                                                                                                                                                                                  |
| EP2471896 | MP | United Kingdom | 2022-Oct-21 | EP_15_17288133 | A/canada_gross/England/284558/2022           | Animal and Plant Health Agency (APHA)                           | Animal and Plant Health Agency (APHA)              |                                                                                                                                                                                  |
| EP2576117 | NS | Denmark        | 2022-Jan-17 | EP_15_17447412 | A/red fox/Denmark/016179-1.01-2/2022         | Statens Serum Institut                                          | Statens Serum Institut                             | Hjalager,Charlotte,Liang,Yuan                                                                                                                                                    |
| EP2576114 | NP | Denmark        | 2022-Jan-17 | EP_15_17447412 | A/red fox/Denmark/016179-1.01-2/2022         | Statens Serum Institut                                          | Statens Serum Institut                             | Hjalager,Charlotte,Liang,Yuan                                                                                                                                                    |
| EP2576116 | MP | Denmark        | 2022-Jan-17 | EP_15_17447412 | A/red fox/Denmark/016179-1.01-2/2022         | Statens Serum Institut                                          | Statens Serum Institut                             | Hjalager,Charlotte,Liang,Yuan                                                                                                                                                    |
| EP2576142 | NP | Denmark        | 2022-Apr-28 | EP_15_17447413 | A/red fox/Denmark/08058-1.01/2022            | Statens Serum Institut                                          | Statens Serum Institut                             | Hjalager,Charlotte,Liang,Yuan                                                                                                                                                    |
| EP2576144 | MP | Denmark        | 2022-Apr-28 | EP_15_17447413 | A/red fox/Denmark/08058-1.01/2022            | Statens Serum Institut                                          | Statens Serum Institut                             | Hjalager,Charlotte,Liang,Yuan                                                                                                                                                    |
| EP2576145 | NS | Denmark        | 2022-Apr-28 | EP_15_17447413 | A/red fox/Denmark/08058-1.01/2022            | Statens Serum Institut                                          | Statens Serum Institut                             | Hjalager,Charlotte,Liang,Yuan                                                                                                                                                    |
| EP2576153 | NS | Denmark        | 2022-Apr-28 | EP_15_17447414 | A/red fox/Denmark/08058-2.02-2/2022          | Statens Serum Institut                                          | Statens Serum Institut                             | Hjalager,Charlotte,Liang,Yuan                                                                                                                                                    |
| EP2576150 | NP | Denmark        | 2022-Apr-28 | EP_15_17447414 | A/red fox/Denmark/08058-2.02-2/2022          | Statens Serum Institut                                          | Statens Serum Institut                             | Hjalager,Charlotte,Liang,Yuan                                                                                                                                                    |
| EP2576152 | MP | Denmark        | 2022-Apr-28 | EP_15_17447414 | A/red fox/Denmark/08058-2.02-2/2022          | Statens Serum Institut                                          | Statens Serum Institut                             | Hjalager,Charlotte,Liang,Yuan                                                                                                                                                    |
| EP2576158 | NP | Denmark        | 2022-Apr-28 | EP_15_17447440 | A/red fox/Denmark/08058-1.02-2/2022          | Statens Serum Institut                                          | Statens Serum Institut                             | Hjalager,Charlotte,Liang,Yuan                                                                                                                                                    |
| EP2576160 | MP | Denmark        | 2022-Apr-28 | EP_15_17447440 | A/red fox/Denmark/08058-1.02-2/2022          | Statens Serum Institut                                          | Statens Serum Institut                             | Hjalager,Charlotte,Liang,Yuan                                                                                                                                                    |
| EP2576161 | NS | Denmark        | 2022-Apr-28 | EP_15_17447440 | A/red fox/Denmark/08058-1.02-2/2022          | Statens Serum Institut                                          | Statens Serum Institut                             | Hjalager,Charlotte,Liang,Yuan                                                                                                                                                    |
| EP2509000 | NP | United Kingdom | 2022-Jun-19 | EP_15_17465835 | A/herbair_wal/Scotland/054948/2022           | Animal and Plant Health Agency (APHA)                           | Animal and Plant Health Agency (APHA)              |                                                                                                                                                                                  |

|           |    |                |             |                |                                           |                                                                                                                         |                                                     |                                                                                                                                                  |
|-----------|----|----------------|-------------|----------------|-------------------------------------------|-------------------------------------------------------------------------------------------------------------------------|-----------------------------------------------------|--------------------------------------------------------------------------------------------------------------------------------------------------|
| EP1205901 | NS | United Kingdom | 2022-Jun-19 | EP_18_17465815 | A/harbour_wm/Scotland/054948/2022         | Animal and Plant Health Agency (APHA)                                                                                   | Animal and Plant Health Agency (APHA)               |                                                                                                                                                  |
| EP1205902 | MP | United Kingdom | 2022-Jun-19 | EP_18_17465815 | A/harbour_wm/Scotland/054948/2022         | Animal and Plant Health Agency (APHA)                                                                                   | Animal and Plant Health Agency (APHA)               |                                                                                                                                                  |
| EP1205929 | NP | Austria        | 2022-Dec-28 | EP_18_17512128 | A/Innsbr_wm/Austria/22155613/2022         | Institute for Veterinary Disease Control Modelling, Austrian Agency for Health and Food Safety                          | Austrian Agency for Health and Food Safety (AGES)   |                                                                                                                                                  |
| EP1205930 | NS | Austria        | 2022-Dec-28 | EP_18_17512128 | A/Innsbr_wm/Austria/22155613/2022         | Institute for Veterinary Disease Control Modelling, Austrian Agency for Health and Food Safety                          | Austrian Agency for Health and Food Safety (AGES)   |                                                                                                                                                  |
| EP1205931 | MP | Austria        | 2022-Dec-28 | EP_18_17512128 | A/Innsbr_wm/Austria/22155613/2022         | Institute for Veterinary Disease Control Modelling, Austrian Agency for Health and Food Safety                          | Austrian Agency for Health and Food Safety (AGES)   |                                                                                                                                                  |
| EP1205886 | NP | Netherlands    | 2022-Jan-16 | EP_18_17580930 | A/Done_Martini/Netherlands/1/2022         | Erasmus Medical Center                                                                                                  | Erasmus Medical Center                              | Vuong,O,Theewissen, S,Shellito-Martin,A,B; Cherkasova, L; Sikkema, R;Foucher, R.A.M.                                                             |
| EP1205887 | NS | Netherlands    | 2022-Jan-16 | EP_18_17580930 | A/Done_Martini/Netherlands/1/2022         | Erasmus Medical Center                                                                                                  | Erasmus Medical Center                              | Vuong,O,Theewissen, S,Shellito-Martin,A,B; Cherkasova, L; Sikkema, R;Foucher, R.A.M.                                                             |
| EP1205888 | MP | Netherlands    | 2022-Jan-16 | EP_18_17580930 | A/Done_Martini/Netherlands/1/2022         | Erasmus Medical Center                                                                                                  | Erasmus Medical Center                              | Vuong,O,Theewissen, S,Shellito-Martin,A,B; Cherkasova, L; Sikkema, R;Foucher, R.A.M.                                                             |
| EP1205889 | NP | Netherlands    | 2022-Jan-16 | EP_18_17583227 | A/Done_Martini/Netherlands/EMC1/2022      | Erasmus Medical Center                                                                                                  | Erasmus Medical Center                              | Vuong,O,Theewissen, S,Shellito-Martin,A,B; Cherkasova, L; Sikkema, R;Foucher, R.A.M.                                                             |
| EP1205890 | NS | Netherlands    | 2022-Jan-16 | EP_18_17583227 | A/Done_Martini/Netherlands/EMC1/2022      | Erasmus Medical Center                                                                                                  | Erasmus Medical Center                              | Vuong,O,Theewissen, S,Shellito-Martin,A,B; Cherkasova, L; Sikkema, R;Foucher, R.A.M.                                                             |
| EP1205891 | MP | Netherlands    | 2022-Jan-16 | EP_18_17583227 | A/Done_Martini/Netherlands/EMC1/2022      | Erasmus Medical Center                                                                                                  | Erasmus Medical Center                              | Vuong,O,Theewissen, S,Shellito-Martin,A,B; Cherkasova, L; Sikkema, R;Foucher, R.A.M.                                                             |
| EP1205892 | NP | Netherlands    | 2022-Sep-13 | EP_18_17583228 | A/Phy/Netherlands/EMC7/2022               | Erasmus Medical Center                                                                                                  | Erasmus Medical Center                              | Vuong,O,Theewissen, S,Shellito-Martin,A,B; Cherkasova, L; Sikkema, R;Foucher, R.A.M.                                                             |
| EP1205893 | NS | Netherlands    | 2022-Sep-13 | EP_18_17583228 | A/Phy/Netherlands/EMC7/2022               | Erasmus Medical Center                                                                                                  | Erasmus Medical Center                              | Vuong,O,Theewissen, S,Shellito-Martin,A,B; Cherkasova, L; Sikkema, R;Foucher, R.A.M.                                                             |
| EP1205894 | MP | Netherlands    | 2022-Sep-13 | EP_18_17583228 | A/Phy/Netherlands/EMC7/2022               | Erasmus Medical Center                                                                                                  | Erasmus Medical Center                              | Vuong,O,Theewissen, S,Shellito-Martin,A,B; Cherkasova, L; Sikkema, R;Foucher, R.A.M.                                                             |
| EP1205874 | NP | France         | 2022-Jan-04 | EP_18_17584742 | A/Isk/France/2205/2022                    | Import from public domain                                                                                               | Import from public domain                           | Crowell,G.; Walsh,M.; Lebar,J.; Siva,S.; Hlavc,F.; Guerin,J.-L.                                                                                  |
| EP1205898 | MP | France         | 2022-Jan-04 | EP_18_17584742 | A/Isk/France/2205/2022                    | Import from public domain                                                                                               | Import from public domain                           | Crowell,G.; Walsh,M.; Lebar,J.; Siva,S.; Hlavc,F.; Guerin,J.-L.                                                                                  |
| EP1205907 | NS | France         | 2022-Jan-04 | EP_18_17584742 | A/Isk/France/2205/2022                    | Import from public domain                                                                                               | Import from public domain                           | Crowell,G.; Walsh,M.; Lebar,J.; Siva,S.; Hlavc,F.; Guerin,J.-L.                                                                                  |
| EP1204030 | NP | Belgium        | 2022-Jun-17 | EP_18_17606776 | A/Larva_argentina/Belgium/08182_0012/2022 | Sciensano - Animal Infectious Diseases                                                                                  | Sciensano, Department of Animal Infectious Diseases | Van Born, Steven; Rospita, Virginie; Heintyn, Pierre; Mathijs, Elisabeth; Lambrecht, Benedicte; Steensels, Mieke                                 |
| EP1204031 | NS | Belgium        | 2022-Jun-17 | EP_18_17606776 | A/Larva_argentina/Belgium/08182_0012/2022 | Sciensano - Animal Infectious Diseases                                                                                  | Sciensano, Department of Animal Infectious Diseases | Van Born, Steven; Rospita, Virginie; Heintyn, Pierre; Mathijs, Elisabeth; Lambrecht, Benedicte; Steensels, Mieke                                 |
| EP1204031 | MP | Belgium        | 2022-Jun-17 | EP_18_17606776 | A/Larva_argentina/Belgium/08182_0012/2022 | Sciensano - Animal Infectious Diseases                                                                                  | Sciensano, Department of Animal Infectious Diseases | Van Born, Steven; Rospita, Virginie; Heintyn, Pierre; Mathijs, Elisabeth; Lambrecht, Benedicte; Steensels, Mieke                                 |
| EP1204039 | MP | Belgium        | 2022-Dec-19 | EP_18_17606777 | A/Gallus_gallus/Belgium/14642_0001/2022   | Sciensano - Animal Infectious Diseases                                                                                  | Sciensano, Department of Animal Infectious Diseases | Van Born, Steven; Rospita, Virginie; Heintyn, Pierre; Mathijs, Elisabeth; Lambrecht, Benedicte; Steensels, Mieke                                 |
| EP1204040 | NS | Belgium        | 2022-Dec-19 | EP_18_17606777 | A/Gallus_gallus/Belgium/14642_0001/2022   | Sciensano - Animal Infectious Diseases                                                                                  | Sciensano, Department of Animal Infectious Diseases | Van Born, Steven; Rospita, Virginie; Heintyn, Pierre; Mathijs, Elisabeth; Lambrecht, Benedicte; Steensels, Mieke                                 |
| EP1204037 | NP | Belgium        | 2022-Dec-19 | EP_18_17606777 | A/Gallus_gallus/Belgium/14642_0001/2022   | Sciensano - Animal Infectious Diseases                                                                                  | Sciensano, Department of Animal Infectious Diseases | Van Born, Steven; Rospita, Virginie; Heintyn, Pierre; Mathijs, Elisabeth; Lambrecht, Benedicte; Steensels, Mieke                                 |
| EP1204035 | NP | Belgium        | 2022-Dec-27 | EP_18_17606778 | A/Gallus_gallus/Belgium/14628_0001/2022   | Sciensano - Animal Infectious Diseases                                                                                  | Sciensano, Department of Animal Infectious Diseases | Van Born, Steven; Rospita, Virginie; Heintyn, Pierre; Mathijs, Elisabeth; Lambrecht, Benedicte; Steensels, Mieke                                 |
| EP1204036 | NS | Belgium        | 2022-Dec-27 | EP_18_17606778 | A/Gallus_gallus/Belgium/14628_0001/2022   | Sciensano - Animal Infectious Diseases                                                                                  | Sciensano, Department of Animal Infectious Diseases | Van Born, Steven; Rospita, Virginie; Heintyn, Pierre; Mathijs, Elisabeth; Lambrecht, Benedicte; Steensels, Mieke                                 |
| EP1204036 | MP | Belgium        | 2022-Dec-27 | EP_18_17606778 | A/Gallus_gallus/Belgium/14628_0001/2022   | Sciensano - Animal Infectious Diseases                                                                                  | Sciensano, Department of Animal Infectious Diseases | Van Born, Steven; Rospita, Virginie; Heintyn, Pierre; Mathijs, Elisabeth; Lambrecht, Benedicte; Steensels, Mieke                                 |
| EP1205039 | NP | United Kingdom | 2022-Jan-24 | EP_18_17617991 | A/Lustratus/England/13709/2022            | Public Health Wales Microbiology Cardiff                                                                                | Public Health Wales Microbiology Cardiff            | Catherine,Moore; Elisabeth,Chadwick; Kathleen,Phelan; Tim,James; Anastasia,Cozzani; Chloe,Farrington; Joanne,Walton; Sally,Carden and Tom,Connor |
| EP1205037 | MP | United Kingdom | 2022-Jan-24 | EP_18_17617991 | A/Lustratus/England/13709/2022            | Public Health Wales Microbiology Cardiff                                                                                | Public Health Wales Microbiology Cardiff            | Catherine,Moore; Elisabeth,Chadwick; Kathleen,Phelan; Tim,James; Anastasia,Cozzani; Chloe,Farrington; Joanne,Walton; Sally,Carden and Tom,Connor |
| EP1205040 | NS | United Kingdom | 2022-Jan-24 | EP_18_17617991 | A/Lustratus/England/13709/2022            | Public Health Wales Microbiology Cardiff                                                                                | Public Health Wales Microbiology Cardiff            | Catherine,Moore; Elisabeth,Chadwick; Kathleen,Phelan; Tim,James; Anastasia,Cozzani; Chloe,Farrington; Joanne,Walton; Sally,Carden and Tom,Connor |
| EP1208770 | MP | Italy          | 2022-Oct-21 | EP_18_17769590 | A/Chicken/Italy/22VR10044_14/2022         | Istituto Zooprofilattico Sperimentale delle Venezie, EU/OIE/Reference Laboratory and FAO Reference Centre for AI and ND | Istituto Zooprofilattico Sperimentale Delle Venezie | Zecchin, B.,Pastori, A.,Favaro, A.,Schivo, A.,Salvato, A.,Palumbo, E.,Giussani, E.,Moroni, I.,Bonfanti, F.,Terreggio, C.                         |
| EP1208768 | NP | Italy          | 2022-Oct-21 | EP_18_17769590 | A/Chicken/Italy/22VR10044_14/2022         | Istituto Zooprofilattico Sperimentale delle Venezie, EU/OIE/Reference Laboratory and FAO Reference Centre for AI and ND | Istituto Zooprofilattico Sperimentale Delle Venezie | Zecchin, B.,Pastori, A.,Favaro, A.,Schivo, A.,Salvato, A.,Palumbo, E.,Giussani, E.,Moroni, I.,Bonfanti, F.,Terreggio, C.                         |
| EP1208771 | NS | Italy          | 2022-Oct-21 | EP_18_17769590 | A/Chicken/Italy/22VR10044_14/2022         | Istituto Zooprofilattico Sperimentale delle Venezie, EU/OIE/Reference Laboratory and FAO Reference Centre for AI and ND | Istituto Zooprofilattico Sperimentale Delle Venezie | Zecchin, B.,Pastori, A.,Favaro, A.,Schivo, A.,Salvato, A.,Palumbo, E.,Giussani, E.,Moroni, I.,Bonfanti, F.,Terreggio, C.                         |
| EP1208944 | NP | Austria        | 2022-Jan-14 | EP_18_17785726 | A/Wein/Austria/2204012-001/2022           | Austrian Agency for Health and Food Safety (AGES)                                                                       | Austrian Agency for Health and Food Safety (AGES)   |                                                                                                                                                  |
| EP1208945 | NS | Austria        | 2022-Jan-14 | EP_18_17785726 | A/Wein/Austria/2204012-001/2022           | Austrian Agency for Health and Food Safety (AGES)                                                                       | Austrian Agency for Health and Food Safety (AGES)   |                                                                                                                                                  |
| EP1208946 | MP | Austria        | 2022-Jan-14 | EP_18_17785726 | A/Wein/Austria/2204012-001/2022           | Austrian Agency for Health and Food Safety (AGES)                                                                       | Austrian Agency for Health and Food Safety (AGES)   |                                                                                                                                                  |

|            |    |             |                  |                |                                       |                                                   |                                                                  |                                                                       |
|------------|----|-------------|------------------|----------------|---------------------------------------|---------------------------------------------------|------------------------------------------------------------------|-----------------------------------------------------------------------|
| EP1289252  | NP | Austria     | 2022-Jan-19      | EP_1S_17785727 | A/Italy/Ann/Austria/22005809-021/2022 | Austrian Agency for Health and Food Safety (AGES) | Austrian Agency for Health and Food Safety (AGES)                |                                                                       |
| EP1289253  | NS | Austria     | 2022-Jan-19      | EP_1S_17785727 | A/Italy/Ann/Austria/22005809-021/2022 | Austrian Agency for Health and Food Safety (AGES) | Austrian Agency for Health and Food Safety (AGES)                |                                                                       |
| EP1289254  | MP | Austria     | 2022-Jan-19      | EP_1S_17785727 | A/Italy/Ann/Austria/22005809-021/2022 | Austrian Agency for Health and Food Safety (AGES) | Austrian Agency for Health and Food Safety (AGES)                |                                                                       |
| EP1289252  | MP | Austria     | 2022-Apr-13      | EP_1S_17785728 | A/Ann/Austria/22046299-022/2022       | Austrian Agency for Health and Food Safety (AGES) | Austrian Agency for Health and Food Safety (AGES)                |                                                                       |
| EP1289260  | NP | Austria     | 2022-Apr-13      | EP_1S_17785728 | A/Ann/Austria/22046299-022/2022       | Austrian Agency for Health and Food Safety (AGES) | Austrian Agency for Health and Food Safety (AGES)                |                                                                       |
| EP1289261  | NS | Austria     | 2022-Apr-13      | EP_1S_17785728 | A/Ann/Austria/22046299-022/2022       | Austrian Agency for Health and Food Safety (AGES) | Austrian Agency for Health and Food Safety (AGES)                |                                                                       |
| EP1289264  | NP | Austria     | 2022-Jan-03      | EP_1S_17785731 | A/Italy/Ann/Austria/22000962-021/2022 | Austrian Agency for Health and Food Safety (AGES) | Austrian Agency for Health and Food Safety (AGES)                |                                                                       |
| EP1289265  | NS | Austria     | 2022-Jan-03      | EP_1S_17785731 | A/Italy/Ann/Austria/22000962-021/2022 | Austrian Agency for Health and Food Safety (AGES) | Austrian Agency for Health and Food Safety (AGES)                |                                                                       |
| EP1289266  | MP | Austria     | 2022-Jan-03      | EP_1S_17785731 | A/Italy/Ann/Austria/22000962-021/2022 | Austrian Agency for Health and Food Safety (AGES) | Austrian Agency for Health and Food Safety (AGES)                |                                                                       |
| EP1289262  | NP | Austria     | 2022-Jan-24      | EP_1S_17785732 | A/Italy/Ann/Austria/22007648-021/2022 | Austrian Agency for Health and Food Safety (AGES) | Austrian Agency for Health and Food Safety (AGES)                |                                                                       |
| EP1289263  | NS | Austria     | 2022-Jan-24      | EP_1S_17785732 | A/Italy/Ann/Austria/22007648-021/2022 | Austrian Agency for Health and Food Safety (AGES) | Austrian Agency for Health and Food Safety (AGES)                |                                                                       |
| EP1289264  | MP | Austria     | 2022-Jan-24      | EP_1S_17785732 | A/Italy/Ann/Austria/22007648-021/2022 | Austrian Agency for Health and Food Safety (AGES) | Austrian Agency for Health and Food Safety (AGES)                |                                                                       |
| EP1289300  | NP | Austria     | 2022-Mar-11      | EP_1S_17785733 | A/Ann/Austria/22038844-004/2022       | Austrian Agency for Health and Food Safety (AGES) | Austrian Agency for Health and Food Safety (AGES)                |                                                                       |
| EP1289301  | NS | Austria     | 2022-Mar-11      | EP_1S_17785733 | A/Ann/Austria/22038844-004/2022       | Austrian Agency for Health and Food Safety (AGES) | Austrian Agency for Health and Food Safety (AGES)                |                                                                       |
| EP1289302  | MP | Austria     | 2022-Mar-11      | EP_1S_17785733 | A/Ann/Austria/22038844-004/2022       | Austrian Agency for Health and Food Safety (AGES) | Austrian Agency for Health and Food Safety (AGES)                |                                                                       |
| EP1073122  | NP | Netherlands | 2022-May-26      | EP_1S_13399997 | A/Greyling Gooisa/Netherlands/1/2022  | Erasmus Medical Center                            | Erasmus Medical Center                                           |                                                                       |
| EP1073123  | NS | Netherlands | 2022-May-26      | EP_1S_13399997 | A/Greyling Gooisa/Netherlands/1/2022  | Erasmus Medical Center                            | Erasmus Medical Center                                           |                                                                       |
| EP1073124  | MP | Netherlands | 2022-May-26      | EP_1S_13399997 | A/Greyling Gooisa/Netherlands/1/2022  | Erasmus Medical Center                            | Erasmus Medical Center                                           |                                                                       |
| EP1047800  | HA | Netherlands | 2022-February-18 | EP_1S_17076095 | A/Netherlands/10155/2023              | Academic Medical Center, University of Amsterdam  | UMC                                                              | A, Meijer, L, Wijman, S, vt Brink                                     |
| EP1047849  | NA | Netherlands | 2022-February-18 | EP_1S_17076095 | A/Netherlands/10155/2023              | Academic Medical Center, University of Amsterdam  | UMC                                                              | A, Meijer, L, Wijman, S, vt Brink                                     |
| EP1264455  | HA | UK          | 2022-December-12 | EP_1S_16305454 | A/Italy/9950/2022                     | Public Health Wales Microbiology Cardiff          | Public Health Wales Microbiology Cardiff                         | Public Health Wales Microbiology Cardiff                              |
| EP1264457  | NA | UK          | 2022-December-12 | EP_1S_16305454 | A/Italy/9950/2022                     | Public Health Wales Microbiology Cardiff          | Public Health Wales Microbiology Cardiff                         | Public Health Wales Microbiology Cardiff                              |
| EP12905188 | HA | Australia   | 2023-January-5   | EP_1S_16613693 | A/Victoria/7/2023                     | Austin Health                                     | WHO Collaborating Centre for Reference and Research on Influenza | Deng, Y M, Bari, I, Aziz, A                                           |
| EP12905187 | NA | Australia   | 2023-January-5   | EP_1S_16613693 | A/Victoria/7/2023                     | Austin Health                                     | WHO Collaborating Centre for Reference and Research on Influenza | Deng, Y M, Bari, I, Aziz, A                                           |
| EP1566231  | HA | USA         | 2019-December-19 | EP_1S_464460   | A/Wisconsin/248/2019                  | Wisconsin State Laboratory of Hygiene             | CDC                                                              | CDC                                                                   |
| EP1566230  | NA | USA         | 2019-December-19 | EP_1S_464460   | A/Wisconsin/248/2019                  | Wisconsin State Laboratory of Hygiene             | CDC                                                              | CDC                                                                   |
| EP1617983  | HA | USA         | 2019-October-5   | EP_1S_387028   | A/Hawaii/70/2019                      | State of Hawaii Department of Health              | CDC                                                              | CDC                                                                   |
| EP1617982  | NA | USA         | 2019-October-5   | EP_1S_387028   | A/Hawaii/70/2019                      | State of Hawaii Department of Health              | CDC                                                              | CDC                                                                   |
| EP1242470  | HA | China       | 2019-June-17     | EP_1S_177080   | A/Guangdong/Moanay/WA11536/2019       | WHO Chinese National Influenza Center             | WHO Chinese National Influenza Center                            | Xiao, Zeng, Xian, Li, Wu, Huang, Li, Yang, Dayan, Wang                |
| EP1242469  | NA | China       | 2019-June-17     | EP_1S_177080   | A/Guangdong/Moanay/WA11536/2019       | WHO Chinese National Influenza Center             | WHO Chinese National Influenza Center                            | Xiao, Zeng, Xian, Li, Wu, Huang, Li, Yang, Dayan, Wang                |
| EP12226437 | HA | Norway      | 2022-August-22   | EP_1S_15029451 | A/Norway/10483/2022                   | WHO National Influenza Centre                     | Crisk Worldwide Influenza Centre                                 |                                                                       |
| EP12226438 | NA | Norway      | 2022-August-22   | EP_1S_15029451 | A/Norway/10483/2022                   | WHO National Influenza Centre                     | Crisk Worldwide Influenza Centre                                 |                                                                       |
| EP1297499  | HA | Sri Lanka   | 2023-January-2   | EP_1S_16899227 | A/Sri Lanka/1/2023                    | Medical Research Institute                        | WHO Collaborating Centre for Reference and Research on Influenza |                                                                       |
| EP1297498  | NA | Sri Lanka   | 2023-January-2   | EP_1S_16899227 | A/Sri Lanka/1/2023                    | Medical Research Institute                        | WHO Collaborating Centre for Reference and Research on Influenza |                                                                       |
| EP1292849  | HA | Pakistan    | 2023-January-4   | EP_1S_16830764 | A/Pakistan/GHON ICT 123/2023          | NHI Pakistan                                      | NHI Pakistan                                                     | Nasir, Badi, Amer, Ijaz, Muhammad, Salmas, Hameed, Mirza, Abdul, Ahal |

|             |    |                      |                  |                |                                      |                                                                  |                                                                  |                                                                                                 |
|-------------|----|----------------------|------------------|----------------|--------------------------------------|------------------------------------------------------------------|------------------------------------------------------------------|-------------------------------------------------------------------------------------------------|
| EP12364892  | NA | Pakistan             | 2023-January-4   | EP_1S_1688704  | A/Pakistan/GHSA/ICT/123/2023         | NPI Pakistan                                                     | NPI Pakistan                                                     | Nashir, Bader; Armer, Jbran; Muhammad, Salman; HamezaAhmad, Mirza; Abdul, Ahsid                 |
| EP12457821  | HA | Spain                | 2023-March-7     | EP_1S_17190000 | A/Catalonia/NSAV/19836934/2023       | Hospital Universitari Anax del Vilanova                          | Hospital Universitari Vall d'Hebron                              | Andreu, C.; Gonzalez-Sanchez, A.; Pinares, M.; Martin, M.C.; Codina, M.; Pomeroy, T.; Anton, A. |
| EP12457830  | NA | Spain                | 2023-March-7     | EP_1S_17190000 | A/Catalonia/NSAV/19836934/2023       | Hospital Universitari Anax del Vilanova                          | Hospital Universitari Vall d'Hebron                              | Andreu, C.; Gonzalez-Sanchez, A.; Pinares, M.; Martin, M.C.; Codina, M.; Pomeroy, T.; Anton, A. |
| EP12412887  | HA | Brazil               | 2022-December-11 | EP_1S_16954869 | A/Mato Grosso do Sul/AL/C131834/2022 | Instituto Adolfo Lutz National Influenza Centre                  | Instituto Adolfo Lutz                                            | Sacchi, C.T.; Campos, K.R.; Amarante, A.F.; Santos, M.B.N.; Santos, K.C.O.; Bereng, M.A.        |
| EP12412886  | NA | Brazil               | 2022-December-11 | EP_1S_16954869 | A/Mato Grosso do Sul/AL/C131834/2022 | Instituto Adolfo Lutz National Influenza Centre                  | Instituto Adolfo Lutz                                            | Sacchi, C.T.; Campos, K.R.; Amarante, A.F.; Santos, M.B.N.; Santos, K.C.O.; Bereng, M.A.        |
| EP121250129 | HA | Netherlands          | 2023-January-11  | EP_1S_16807930 | A/Netherlands/030395/2023            | Erasmus Medical Center                                           | Erasmus Medical Center                                           |                                                                                                 |
| EP121250128 | NA | Netherlands          | 2023-January-11  | EP_1S_16807930 | A/Netherlands/030395/2023            | Erasmus Medical Center                                           | Erasmus Medical Center                                           |                                                                                                 |
| EP1547563   | HA | Australia            | 2019-November-22 | EP_1S_4619003  | A/Victoria/2570/2019                 | Alfred Hospital                                                  | WHO Collaborating Centre for Reference and Research on Influenza | Dang, Y.M.; Iannello, P.; Lau, H.; Todd, A.; Spiasson, N.; Mouslin, J.; Komadina, N.            |
| EP1547562   | NA | Australia            | 2019-November-22 | EP_1S_4619003  | A/Victoria/2570/2019                 | Alfred Hospital                                                  | WHO Collaborating Centre for Reference and Research on Influenza | Dang, Y.M.; Iannello, P.; Lau, H.; Todd, A.; Spiasson, N.; Mouslin, J.; Komadina, N.            |
| EP12136122  | HA | United Arab Emirates | 2022-July-14     | EP_1S_14727205 | A/Abu Dhabi/0802994/2022             | Shuaib Khalifa Medical City                                      | CDC                                                              | CDC                                                                                             |
| EP12136121  | NA | United Arab Emirates | 2022-July-14     | EP_1S_14727205 | A/Abu Dhabi/0802994/2022             | Shuaib Khalifa Medical City                                      | CDC                                                              | CDC                                                                                             |
| EP12472894  | HA | Netherlands          | 2023-February-13 | EP_1S17078101  | A/Netherlands/10168/2023             | RIVM                                                             | RIVM                                                             | A.; Meijer, L.; Wijman, S.; de Brink                                                            |
| EP12412893  | NA | Netherlands          | 2023-February-13 | EP_1S17078101  | A/Netherlands/10168/2023             | RIVM                                                             | RIVM                                                             | A.; Meijer, L.; Wijman, S.; de Brink                                                            |
| EP1247456   | HA | Norway               | 2023-February-20 | EP_1S_1726679  | A/Norway/01170/2023                  | Midre Hospital Laboratory for Medical Microbiology               | Norwegian Institute of Public Health                             | Bragstad, K.; Hummel, O.; Medberg, M.P.; Rohringer, A.; Rii, B.                                 |
| EP1247455   | NA | Norway               | 2023-February-20 | EP_1S_1726679  | A/Norway/01170/2023                  | Midre Hospital Laboratory for Medical Microbiology               | Norwegian Institute of Public Health                             | Bragstad, K.; Hummel, O.; Medberg, M.P.; Rohringer, A.; Rii, B.                                 |
| EP12412887  | HA | Pakistan             | 2023-February-18 | EP_1S_16872586 | A/Pakistan/GHSA/ICT/169/2023         | NPI Pakistan                                                     | NPI Pakistan                                                     | Nashir, Bader; Armer, Jbran; Muhammad, Salman; HamezaAhmad, Mirza; Abdul, Ahsid                 |
| EP12412891  | NA | Pakistan             | 2023-February-18 | EP_1S_16872586 | A/Pakistan/GHSA/ICT/169/2023         | NPI Pakistan                                                     | NPI Pakistan                                                     | Nashir, Bader; Armer, Jbran; Muhammad, Salman; HamezaAhmad, Mirza; Abdul, Ahsid                 |
| EP12467771  | HA | Japan                | 2022-December-9  | EP_1S_17244483 | A/Okinawa/194/2022                   | Okinawa Prefectural Institute of Health and Environment          | NID                                                              | Takahata, Emi; Fujikaki, Seichiro; Watanabe, Shiro; Hasegawa, Hidaki                            |
| EP12467771  | NA | Japan                | 2022-December-9  | EP_1S_17244483 | A/Okinawa/194/2022                   | Okinawa Prefectural Institute of Health and Environment          | NID                                                              | Takahata, Emi; Fujikaki, Seichiro; Watanabe, Shiro; Hasegawa, Hidaki                            |
| EP12030270  | HA | Australia            | 2022-March-21    | EP_1S_12579872 | A/Victoria/50/2022                   | Dorveth Pathology                                                | WHO Collaborating Centre for Reference and Research on Influenza | Dang, Y.M.; Iannello, P.; Lau, H.; Todd, A.; Spiasson, N.; Mouslin, J.; Komadina, N.            |
| EP12030269  | NA | Australia            | 2022-March-21    | EP_1S_12579872 | A/Victoria/50/2022                   | Dorveth Pathology                                                | WHO Collaborating Centre for Reference and Research on Influenza | Dang, Y.M.; Iannello, P.; Lau, H.; Todd, A.; Spiasson, N.; Mouslin, J.; Komadina, N.            |
| EP1185402   | HA | Australia            | 2021-March-16    | EP_1S_3034319  | A/Queensland/2021                    | WHO Collaborating Centre for Reference and Research on Influenza | CDC                                                              |                                                                                                 |
| EP1185401   | NA | Australia            | 2021-March-16    | EP_1S_3034319  | A/Queensland/2021                    | WHO Collaborating Centre for Reference and Research on Influenza | CDC                                                              |                                                                                                 |
| EP1184189   | HA | Cambodia             | 2020-July-15     | EP_1S_344619   | A/Cambodia/6826362/2020              | Institute Pasteur du Cambodie                                    | WHO Collaborating Centre for Reference and Research on Influenza | Dang, Y.M.; Iannello, P.; Lau, H.; Todd, A.; Spiasson, N.; Mouslin, J.; Komadina, N.            |
| EP1184188   | NA | Cambodia             | 2020-July-15     | EP_1S_344619   | A/Cambodia/6826362/2020              | Institute Pasteur du Cambodie                                    | WHO Collaborating Centre for Reference and Research on Influenza | Dang, Y.M.; Iannello, P.; Lau, H.; Todd, A.; Spiasson, N.; Mouslin, J.; Komadina, N.            |
| EP12291149  | HA | UK                   | 2023-January-3   | EP_1S_16527800 | A/Berry/2781/2023                    | Public Health Wales Microbiology Cardiff                         | Public Health Wales Microbiology Cardiff                         | Public Health Wales Microbiology Cardiff                                                        |
| EP12291151  | NA | UK                   | 2023-January-3   | EP_1S_16527800 | A/Berry/2781/2023                    | Public Health Wales Microbiology Cardiff                         | Public Health Wales Microbiology Cardiff                         | Public Health Wales Microbiology Cardiff                                                        |
| EP12211567  | HA | UK                   | 2022-October-22  | EP_1S_17272747 | A/Caerphilly/7012/2022               | Public Health Wales Microbiology Cardiff                         | Public Health Wales Microbiology Cardiff                         | Public Health Wales Microbiology Cardiff                                                        |
| EP12211569  | NA | UK                   | 2022-October-22  | EP_1S_17272747 | A/Caerphilly/7012/2022               | Public Health Wales Microbiology Cardiff                         | Public Health Wales Microbiology Cardiff                         | Public Health Wales Microbiology Cardiff                                                        |
| EP12468282  | HA | Japan                | 2023-February-13 | EP_1S_17244658 | A/Kanagawa/AC2206/2023               | NID                                                              | NID                                                              |                                                                                                 |
| EP12468281  | NA | Japan                | 2023-February-13 | EP_1S_17244658 | A/Kanagawa/AC2206/2023               | NID                                                              | NID                                                              |                                                                                                 |
| EP1241179   | HA | Tunisia              | 2022-December-14 | EP_1S_16759949 | A/Tunisia/23298/2022                 | National Influenza Centre-Tunis                                  | Crick Worldwide Influenza Centre                                 |                                                                                                 |
| EP12393242  | NA | Tunisia              | 2022-December-14 | EP_1S_16759949 | A/Tunisia/23298/2022                 | National Influenza Centre-Tunis                                  | Crick Worldwide Influenza Centre                                 |                                                                                                 |
| EP12392074  | HA | China                | 2022-December-11 | EP_1S_16873551 | A/Hebei/Shuangliu/11348/2022         | WHO Chinese National Influenza Centre                            | WHO Chinese National Influenza Centre                            | Wang Dayan, Li Ryan, Wang Wujuan, Zeng Xianou                                                   |
| EP12392073  | NA | China                | 2022-December-11 | EP_1S_16873551 | A/Hebei/Shuangliu/11348/2022         | WHO Chinese National Influenza Centre                            | WHO Chinese National Influenza Centre                            | Wang Dayan, Li Ryan, Wang Wujuan, Zeng Xianou                                                   |

|            |    |                |                 |                |                                   |                                                                             |                                  |
|------------|----|----------------|-----------------|----------------|-----------------------------------|-----------------------------------------------------------------------------|----------------------------------|
| EP1246214  | HA | Spain          | 2023-February-3 | EP_1S_17092318 | A/Andalusia/PMC-00021/2023        | Servicio de Microbiología Hospital Universitario Virgen del Rocío           | Fundacion Progreso y Salud       |
| EP1246215  | NA | Spain          | 2023-February-3 | EP_1S_17092318 | A/Andalusia/PMC-00021/2023        | Servicio de Microbiología Hospital Universitario Virgen del Rocío           | Fundacion Progreso y Salud       |
| EP1247284  | HA | United Kingdom | 2022-Apr-15     | EP_1S_12943536 | A/Northern Ireland/V22014094/2022 | Regional Virus Laboratory, Microbiology Department, Royal Victoria Hospital | Crick Worldwide Influenza Centre |
| EP1247285  | NA | United Kingdom | 2022-Apr-15     | EP_1S_12943536 | A/Northern Ireland/V22014094/2022 | Regional Virus Laboratory, Microbiology Department, Royal Victoria Hospital | Crick Worldwide Influenza Centre |
| EP1247286  | HA | United Kingdom | 2022-Apr-25     | EP_1S_12943540 | A/Northern Ireland/V22015088/2022 | Regional Virus Laboratory, Microbiology Department, Royal Victoria Hospital | Crick Worldwide Influenza Centre |
| EP1247287  | NA | United Kingdom | 2022-Apr-25     | EP_1S_12943540 | A/Northern Ireland/V22015088/2022 | Regional Virus Laboratory, Microbiology Department, Royal Victoria Hospital | Crick Worldwide Influenza Centre |
| EP1247288  | HA | United Kingdom | 2022-Apr-12     | EP_1S_12943544 | A/Northern Ireland/V22290637/2022 | Regional Virus Laboratory, Microbiology Department, Royal Victoria Hospital | Crick Worldwide Influenza Centre |
| EP1247289  | NA | United Kingdom | 2022-Apr-22     | EP_1S_12943544 | A/Northern Ireland/V22290637/2022 | Regional Virus Laboratory, Microbiology Department, Royal Victoria Hospital | Crick Worldwide Influenza Centre |
| EP1250519  | HA | United Kingdom | 2022-Mar-31     | EP_1S_13017201 | A/Northern Ireland/V22012113/2022 | Regional Virus Laboratory, Microbiology Department, Royal Victoria Hospital | Crick Worldwide Influenza Centre |
| EP1250520  | NA | United Kingdom | 2022-Mar-31     | EP_1S_13017201 | A/Northern Ireland/V22012113/2022 | Regional Virus Laboratory, Microbiology Department, Royal Victoria Hospital | Crick Worldwide Influenza Centre |
| EP1250521  | HA | United Kingdom | 2022-Apr-04     | EP_1S_13017202 | A/Northern Ireland/V22012462/2022 | Regional Virus Laboratory, Microbiology Department, Royal Victoria Hospital | Crick Worldwide Influenza Centre |
| EP1250522  | NA | United Kingdom | 2022-Apr-04     | EP_1S_13017202 | A/Northern Ireland/V22012462/2022 | Regional Virus Laboratory, Microbiology Department, Royal Victoria Hospital | Crick Worldwide Influenza Centre |
| EP1250524  | HA | United Kingdom | 2022-Apr-01     | EP_1S_13017204 | A/Northern Ireland/V22272606/2022 | Regional Virus Laboratory, Microbiology Department, Royal Victoria Hospital | Crick Worldwide Influenza Centre |
| EP1250525  | NA | United Kingdom | 2022-Apr-01     | EP_1S_13017204 | A/Northern Ireland/V22272606/2022 | Regional Virus Laboratory, Microbiology Department, Royal Victoria Hospital | Crick Worldwide Influenza Centre |
| EP12229355 | HA | United Kingdom | 2022-Oct-28     | EP_1S_15837899 | A/Northern Ireland/V22409010/2022 | Regional Virus Laboratory, Microbiology Department, Royal Victoria Hospital | Crick Worldwide Influenza Centre |
| EP12229356 | NA | United Kingdom | 2022-Oct-28     | EP_1S_15837899 | A/Northern Ireland/V22409010/2022 | Regional Virus Laboratory, Microbiology Department, Royal Victoria Hospital | Crick Worldwide Influenza Centre |
| EP12229357 | HA | United Kingdom | 2022-Oct-25     | EP_1S_15837900 | A/Northern Ireland/V22039362/2022 | Regional Virus Laboratory, Microbiology Department, Royal Victoria Hospital | Crick Worldwide Influenza Centre |
| EP12229358 | NA | United Kingdom | 2022-Oct-25     | EP_1S_15837900 | A/Northern Ireland/V22039362/2022 | Regional Virus Laboratory, Microbiology Department, Royal Victoria Hospital | Crick Worldwide Influenza Centre |
