# Supplementary material for: ‘One Health’ Genomic Surveillance of Avian and Human Influenza A Viruses Through Environmental Wastewater Monitoring
Source: bioRxiv or medRxiv preprint supplement (doi:10.1101/2023.08.08.23293833), 2023-08-13
Supplement: Supplementary file [file media-2.pdf]

**Table S1. Description of PCR primers and probe used for screening wastewater and sequencing IAV positive samples.**

| <b>Purpose</b>        | <b>Primer name</b> | <b>Target</b>       | <b>Sequence (5' - 3')</b> | <b>Position</b> | <b>Final reaction concentration (μM)</b> | <b>Reference</b>         |
|-----------------------|--------------------|---------------------|---------------------------|-----------------|------------------------------------------|--------------------------|
| IAV Screening         | SVIP-MP-F          | MP-segment          | GGCCCCCTCAAAGCCGA         | 77–93           | 1.4                                      | <i>Nagy et al., 2021</i> |
| IAV Screening         | SVIP-MP-R          | MP-segment          | CGTCTACGYTGCAGTCC         | 258–242         | 1.4                                      |                          |
| IAV Screening         | SVIP-MP_P2-MGB     | MP-segment          | TCACTKGGCACGGTGAGCGT      | 237–218         | 0.4                                      |                          |
| Genomic Amplification | MBTuni-12          | 3' vRNA<br>Terminus | ACGCGTGATCAGCAAAAAGCAGG   |                 | 0.2                                      | <i>Zhou et al., 2009</i> |
| Genomic Amplification | MBTuni-13          | 5' vRNA<br>Terminus | ACGCGTGATCAGTAGAAACAAGG   |                 | 0.2                                      |                          |

**Table S2 Thermocycling conditions used for SVIP-MPv2 and MBTuni PCRs.**

| Thermocycling conditions   | SVIP-MPv2 (IAV Screening Assay)             |                     |                  |
|----------------------------|---------------------------------------------|---------------------|------------------|
|                            | Temperature (°C)                            | Time (mins:secs)    | Number of cycles |
| Reverse Transcription (RT) | 50                                          | 10:00               |                  |
| RT Denaturation            | 95                                          | 10:00               |                  |
| Denaturation               | 95                                          | 00:10               | 45               |
| Annealing/Extension        | 60                                          | 00.30               |                  |
| Hold                       | 40                                          | ∞                   |                  |
| Thermocycling conditions   | MBTuni (Amplicon Generation for Sequencing) |                     |                  |
|                            | Temperature (°C)                            | Time (hr:mins:secs) | Number of cycles |
| Reverse Transcription (RT) | 42                                          | 1:00:00             |                  |
| RT Denaturation            | 94                                          | 00:02:00            |                  |
| Denaturation               | 94                                          | 00:00:30            | 5                |
| Annealing                  | 45                                          | 00:00:30            |                  |
| Extension                  | 68                                          | 00:03:00            |                  |
| Denaturation               | 94                                          | 00:00:30            | 35               |
| Annealing                  | 57                                          | 00:00:30            |                  |
| Extension                  | 68                                          | 00:03:00            |                  |
| Final extension            | 68                                          | 00:02:00            |                  |
| Hold                       | 4                                           | ∞                   |                  |

### H1N1 and H3N2 Standard Curves

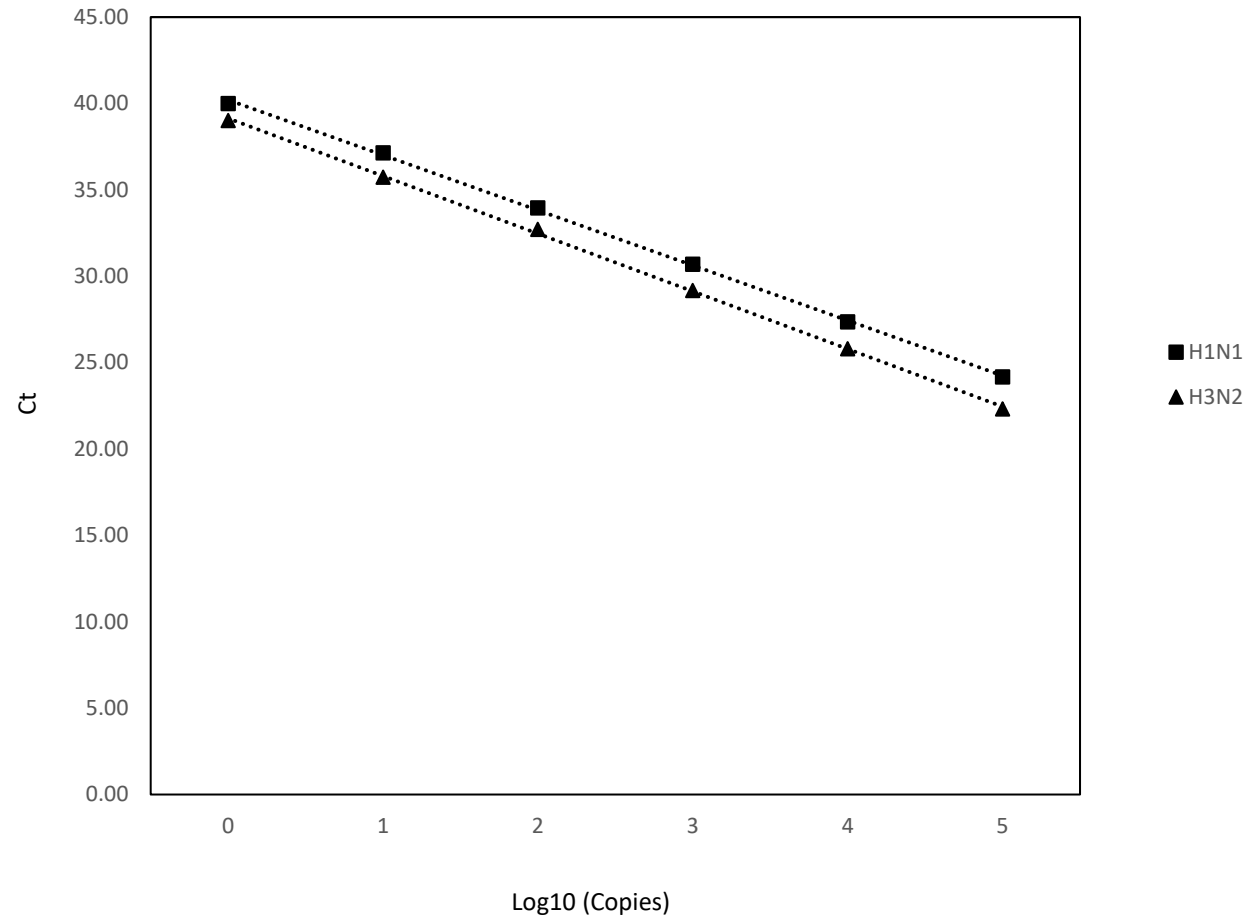

**Figure S1. Standard curve for IAV MP using synthetic H1N1 and H3N2 RNA standards. Amplification efficiency was 105% and 99.3% respectively with R2 >0.999 for both. The LOD95% for the SVIP-MPv2 assay using these standards was approximately 1.5 copies per**

**A**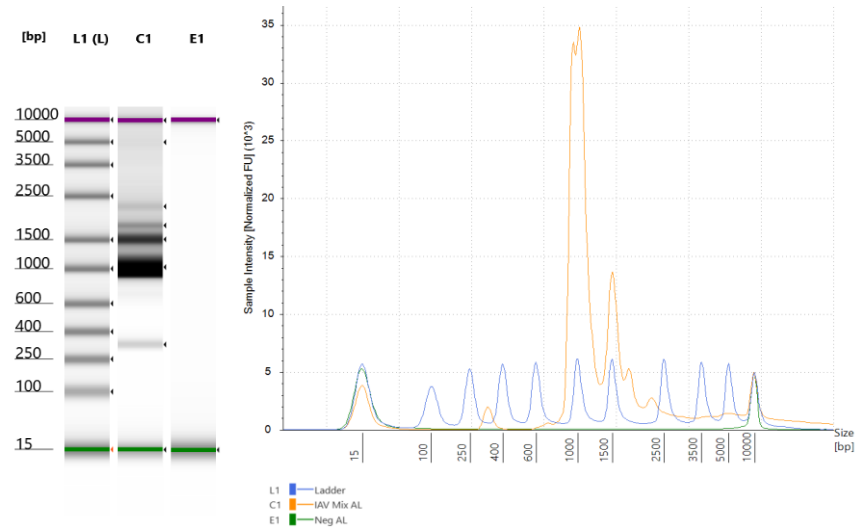**B**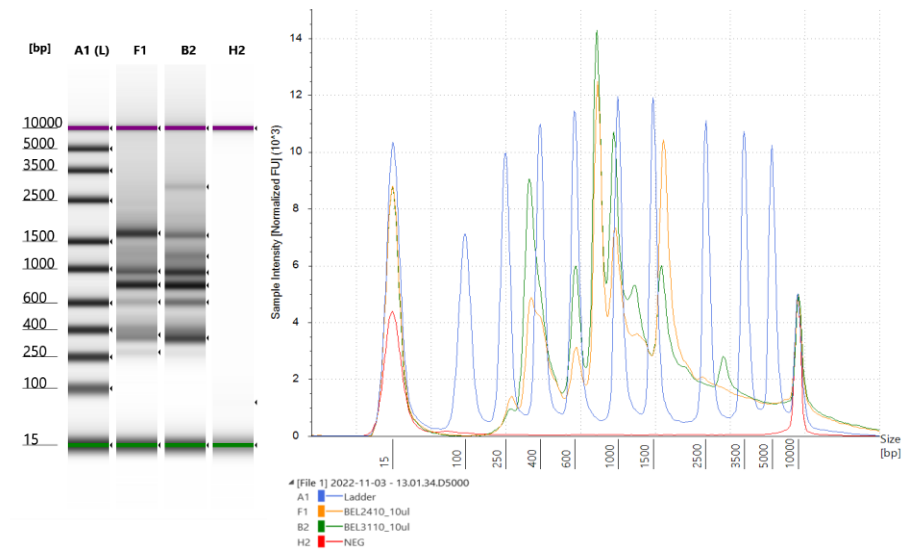

**Figure S2** TapeStation gels and composite electropherograms of purified amplicon mix post multi-segment RT-PCR. (A) Mixed IAV positive control (pH1N1, H1N1, H1N2, H3N2 and H6N1). B) Representative example of wastewater samples: Belfast 24/10/2022 and Belfast 31/10/2022.

Table S3 SVIP-MPv2 assay original screening Ct versus Ct value post M-RTPCR amplicon generation for sequencing.

| WWTW              | Sample Date | Original Ct (avg.) | Sequencing QC Ct | Number Of IAV Reads |
|-------------------|-------------|--------------------|------------------|---------------------|
| Belfast           | 12/09/2022  | 36.7               | 13.8             | 577                 |
| Belfast           | 10/10/2022  | 35.5               | 17               | 131                 |
| Belfast           | 24/10/2022  | 36.6               | 13.6             | 1195                |
| Belfast           | 31/10/2022  | 37.6               | 16               | 1440                |
| Belfast           | 07/11/2022  | 37.6               | 22.5             | 15                  |
| Belfast           | 28/11/2022  | 35.8               | 15.95            | 671                 |
| Ballymena         | 12/09/2022  | 36.5               | 15.7             | 169                 |
| Ballymena         | 28/11/2022  | 35.1               | 13.8             | 818                 |
| Craigavon         | 12/09/2022  | 36.8               | 13.6             | 610                 |
| Derry/Londonderry | 21/11/2022  | 35.2               | 27.4             | None                |
| Enniskillen       | 12/09/2022  | 36.8               | 14.5             | 624                 |
| North Down        | 12/09/2022  | 36.4               | 14.6             | 648                 |
| North Down        | 10/10/2022  | 36.1               | 16.8             | 65                  |
| North Down        | 17/10/2022  | 35.6               | 31.7             | 1                   |
| North Down        | 31/10/2022  | 37.4               | 14.7             | 96                  |
| North Down        | 28/11/2022  | 34.4               | 19.66            | None                |



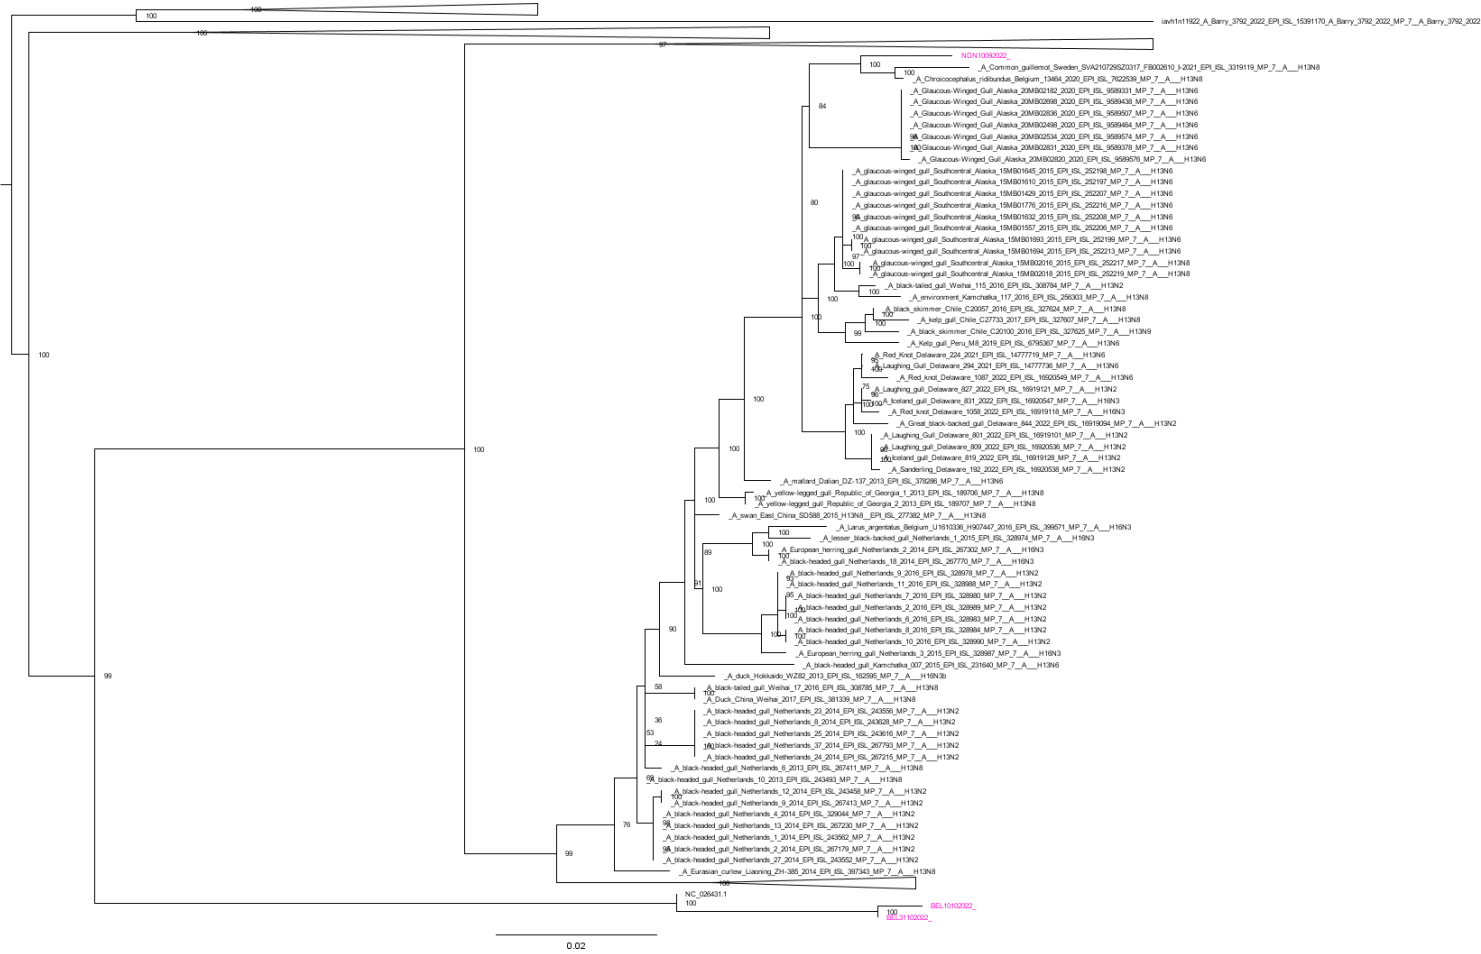

**Figure S4. Maximum-likelihood phylogeny of wastewater-derived avian-like segment 7 sequences.** Phylogenetic tree of the single avian-like segment 7 sequences (in pink; NDN10092022) alongside all GISAID gull H13/16-like sequences (black), and 2022 H5N1 European sequences (in collapsed clades) (accessed January 2023). Relevant bootstrap replicate values are shown on the tree. Human-like segments (BEL10102022 and BEL31102022) are also shown.

## Sample Processing, Screening & Analysis

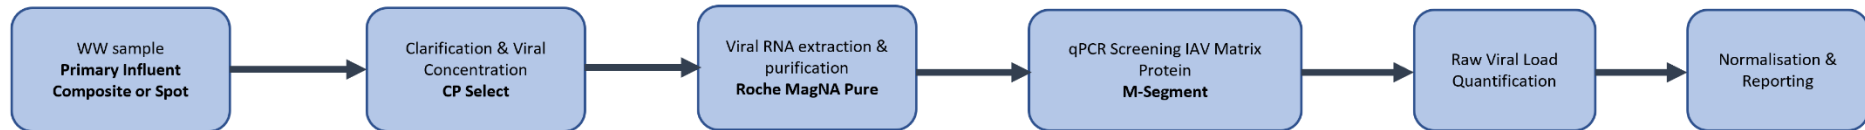

## Sample Sequencing

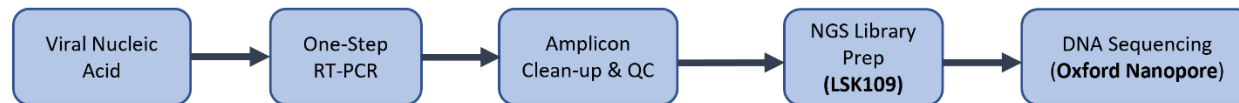

## Sequencing Data Processing & Analysis

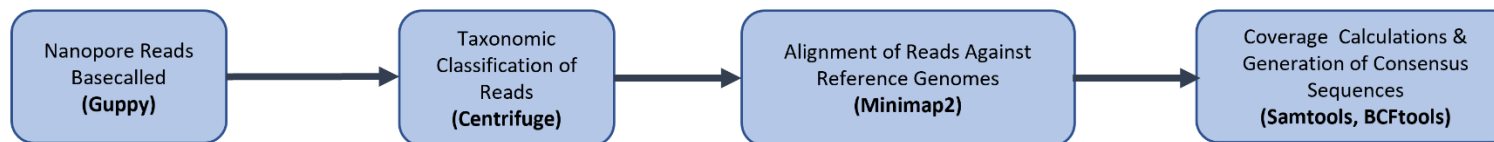

Figure S5 Summary of workflows used.



### All generated clean consensus sequences

>NC\_026438.1 Influenza A virus (A/California/07/2009(H1N1)) segment 1 polymerase PB2 (PB2) gene, complete cds

```
ATGGAGAGAATAAAAGAACTGAGAGATCTAATGTGCGAGTCCCGCACTCGCGAGATACTACTAAGACCA
CTGTGGACCATATGGCCATAATCAAAAAGTACACATCAGGAAGGCAAGAGAAGAACCCTCGACTCAGAAT
GAAGTGGATGATGGCAATGAGATACCCAATTACAGCAGACAAGAGAATAATGGACATGATTCCAGAGAGG
AATGAACAAGGACAACCCTCTGGAGCAAAACAACGATGCTGGATCAGACCGAGTGTGGTATCACCTC
TGGCCGTAACATGGTGAATAGGAATGGCCCAACAACAAGTACAGTTTCATTACCCTAAGGTATATAAAAC
TTATTTGAAAAGGTCGAAAAGTTGAAACATGGTACCTTCGGCCCTGTCCACTTCAGAAATCAAGTTAAA
ATAAGGAGGAGAGTTGATACAAACCCTGGCCATGCAGATCTCAGTGCCAAGGAGGCACAGGATGTGATTA
TGGAAAGTTGTTTTCCAAATGAAGTGGGGGCAAGAATACTGACATCAGAGTCACAGCTGGCAATAACAAA
AGAGAAGAAAAGAGCTCCAGGATTGAAAATTGCTCCCTTGATGGTGGCGTACATGCTAGAAAAGAGAA
TTGGTCCGTAAAACAAGGTTTTCTCCAGTAGCCGCGGAACAGGCAGTGTATATATGAAGTGTGCACT
TAACCAAGGGACGTGCTGGGAGCAGATGTACTCCAGGAGGAGAAGTGAGAAATGATGATGTTGACCA
AAGTTTGATTATCGCTGCTAGAAAACATAGTAAGAAGAGCAGCAGTGTACAGCAGACCCATTAGCATCTC
TTGAAATGTGCCACAGCACACAGATTGGAGGAGTAAGGATGGTGGACATCCTTAGACAGAATCCAACGTG
AGGAACAAGCCGTAGACATATGCAAGGCAGCAATAGGGTTGAGGATTAGCTCATCTTTAGTTTGGTGG
GTTCACTTTCAAAGGACAAGCGGATCATCAGTCAAGAAAGAAGAAGTGTACACGGGCAACCTCCAA
ACACTGAAAATAAGAGTACATGAAGGGTATGAAGAATTACAATGGTTGGGAGAAAGAGCAACAGCTATTC
TCAGAAAGGCAACCAGGAGATTGATCCAGTTGATAGTAAGCGGGAGAGACGAGCAGTCAATTGCTGAGGC
AATAATTGTGGCCATGGTATTCTCACAGGAGGATTGCATGATCAAGGCAGTTAGGGGCGATCTGAACTTT
GTCAATAGGGCAAAACCAGCAGCTGAACCCATGCACCAACTCTTGAGGCATTTCAAAAAGATGCAAAAAG
TGCTTTCCAGAACTGGGGAATTGAATCCATCGACAATGTGATGGGAATGATCGGAATACTGCCCGACAT
GACCCCAAGCAGGAGATGTCGCTGAGAGGATAAGAGTCAGCAAAATGGGAGTAGATGAATACTCCAGC
ACGGAGAGAGTGGTAGTATTGACCGATTTTTAAGGGTTAGAGATCAAGAGGGGAACGTAATTTGT
CTCCGAAGAAGTCAAGTAAACGCAAGGAACTGAGAAGTTGACAATAACTTATTCGTCATCAATGATGTG
GGAGATCAATGGCCCTGAGTCAGTGTAGTCAACACTTATCAATGGATAATCAGGAACTGGGAAATTGTG
AAAATTCAATGGTCAACAAGATCCACAATGTTATACAACAAAATGGAATTTGAACCATTTAGTCTCTTG
TCCCTAAGGCAACCAGAAGCCGGTACAGTGGATTGTAAGGACTGTTCCAGCAAAATGCGGGATGTGCT
TGGGACATTTGACACTGTCCAAATAATAAACTTCTCCCTTTGCTGCTGCCCCACCAGAACAGAGTAGG
ATGCAATTTTCTCATTGACTGTGAATGTGAGAGGATCAGGGTTGAGGATACTGGTAAGAGGCAATTTCTC
CAGTATTCAATTACAACAAGGCAACCAACGACTTACAGTTCTTGGAAAGGATGCAGGTGCATTGACTGA
AGATCCAGATGAAGGCACATCTGGGGTGGAGTCTGCTGTCTGAGAGGATTTCTCATTTTGGGCAAAAGAA
GACAAGAGATATGGCCAGCATTAAAGCATCAATGAACTGAGCAATCTTGCAAAAGGAGAGAAGGCTAATG
TGCTAATTGGGCAAGGGGACGTAGTGTGGTAATGAAACGAAAACGGGACTTAGCATACTACTGACAG
CCAGACAGCGACAAAAGAATTCGGATGGCCATCAATTAG
```

>MF575094.1 Influenza A virus (A/black-headed gull/Netherlands/31/2014(H13N6)) segment 1 polymerase PB2 (PB2) gene, complete cds

```
AGCAAAAGCAGGTCAAATATATTCAATATGGAGAGAATAAAAGAACTAAGAAACCTAATGTCACAATCTC
GCACTCGGAGATACTGACAAAAACACAGTAGACCATATGCCATAATCAAGAAGTACACATCAGGGAG
ACAGGAGAAGAAATCCCGCTCTCAGAAATGAAGTGGATGATGGCAATGAAATATCCAATCACAGCTGACAAA
AGAATAATGGAGATGATCCCTGAGAGGAATGAACAGGGTCAAGTCTTTGGAGCAAACTAATGATGCTG
GTTCCGATAGGGTGTGCTACCTCTAGCTGTAACATGGTGGAAACAGAAACGGACCAACGGCAAGTAC
GGTCCACTATCCAAAGTCTACAGAACTACTTTGAAAAGTTGAGAGATTGAAACATGGAACATTCCGGG
CCCGTTCAATTTCCGAAATCAAGTTAAAATACGCCGTAGAGTTGACACAAATCTGGTACGCAGATCTCA
GTGCTAAAGAGGCACAGGACGTATCATGGAAGTTGATTCCAAATGAAGTGGGGGCTAGAACTAAC
```

ATCAGAGTCACAACGACAATAACAAAGGAAAAGAGGAGGAACCTCAGGACTGCAAAATTGCTCCCCTA  
ATGTTTGCATACATGTTGGAAAGGGAACCTGGTCCGAAAGACTAGATTTTTACCGGTAGCAGCGCGAAACAA  
GCAGCGTTTATATTGAAGTATTGCATTTAACTCAAGGAACCTGCTGGGAACAAATGTACTCCAGGAGG  
GGAAGTGAGGAATGATGATGTTGACCAGAGCTTAATCATTGCTGCAAGAAATATAGTTAGAAGAGCAACA  
GTTTCAGCAGATCCATTAGCATTCACTTTAGAAAATGTGCCATAGTACTCAAATAGCGCGAATAAGGATGG  
TAGACATCCTTAGACAGAACCACAGAAGAACAAGCAGTTGACATTTGTAAGGCAGCGATGGGCCTAAG  
AATCAGCTCGTCTGACGTTTGGAGGATTACCTTTAAAAGGACAAGTGGGTCTATCAAAAAGAGAA  
GAAGAAGTGTCTACGGGCAACCTCCAAACATTGAAAATACGAGTACATGAAGGATACGAGGAATTCACGA  
TGGTTGGTCGGAGAGCAACTGCCATATTAAGGAAAGCAACCAGAAGGCTGATTCAAGTTAATAGTGAGTGG  
GAGAGATGAACAATCCATTGCTGAAGCCATAATTGTAGCGATGGTGTTCACAGAAGATTGCATGATA  
AAAGCTGTTTCGAGGTGACTTGAATTTGTAACAGAGCGAATCAACGGCTGAATCCTATGCACCAGCTTC  
TGAGGCACTTCCAAAAAGACGCGAAGGTGTTGTTTCAAATTTGGGGAGTTGAGCCCATTGACAACGTCAT  
GGGGATGATAGGAATTTGCTGACATGACCCCAACACAGAAATGTCGCTGAGAGGAATAAGAGTTAGC  
AAAATGGGGGTAGATGAATACTCCAGCAGTGAAGAGTGGTTGTGAGCATTGATCGCTTCTAAGGGTTC  
GAGACCAGCGGGGAATGTGCTTTGCTCCCTGAGGAGTCAAGTAAACACAGGGAAACAGAAAAATTGAC  
AATAACGTATTTCATCGTCAATGATGTGGGAGATCAACGGTCCGGAGTCAAGTCTAGTAAACACCTATCAA  
TGGATCATCAGAAATGGGAAGTCATAAAGATTCAATGGTCCAGGATCCTACAATGTTGTACAACAAGA  
TGAATTCGAACCTTCCAATCTTGGTACCTAAGGCTGCCAGAGGCCAATACAGTGGATTGTAAAGAAC  
ATTGTTTCAACAGATGCGCGATGTTGGGGACTTTTGATACTGTCCAAATAATCAAATTAACCGTTT  
GCAGCAGCTCCACCGGAACAGAGTAGGATGCAATTTCTCTCAACTGTGAATGTGAGAGGATCAGGGA  
TGAGAATACTCGTGAGGGGTAACCTCCAGTGTCAACTACAACAAAACCAAGAGACTTACAGTTCT  
CGGGAAAAGATGCAGGCTCCTTAACAGAAGACCCGGATGAGGGTACAGCAGGAGTGGAGTCCGCGATTA  
AGAGGGTTTCTAATTCTAGGCAAAGAAGACAAAAGATACGGGCCAGCATTGAGCATCAATGAAGTGAAGCA  
ATCTTGCAGAAAGGAGAAAAAGCTAATGTGCTAATAGGGCAAGGAGACGTAGTGTGGTAATGAAACGGAA  
ACGGGACTCTAGCATACTACTGACAGTCAAGACAGCGACAAAAGAATTCCGGATGGCCATCAATTAGTGT  
CGAGTTGTTAAAAACGACCTTGTCTACT

>iavh1n11922|A/Mute\_Swan/Netherlands/2/2022|EPI\_ISL\_15364797|A/Mute\_Swan/Netherlands/2/2022|PB2|1||A/Mute\_Swan/Netherlands/2/2022

TCAAATATATTCAATATGGAGAGAATAAAAGAACTAAGAGATTAATGTCGAGTCTCGCACTCGCGAGA  
TACTGACAAAAACCACTGTGGACCATATGCCCATAATAAAGAAATACACATCAGGAAGACAGGAGAAGAA  
CCCTGCCCCTCAGGATGAAGTGGATGATGGCAATGAAATATCCTATTACAGCAGACAAAAGAATAATGGAG  
ATGATCCCTGAAAGGAATGAGCAAGGTCAAGTCTCTGGAGCAAAAACAAATGACGCTGGATCAGACAGAG  
TGATGGTGTCACTCTGGCTGTGACATGTTGGAATAGAAATGGGCCAACGACAAGTACAGTCCATTACCC  
AAAGGTTTACAAAACCTACTTTGAAAAAGTGGAAAGATTGAAACATGGAACCTTTGGCCCTGTTCACTTT  
CGAAATCAAGTTAAGATACGCCGAGGGTTGACATAAACCCGGTCAATGACATCTCAGTGCCAAAGAAG  
CACAGGATGTATCATGGAAGTCGTTTTCCCAATGAAGTTGGAGCCAGGATATTGACATCAGAATCACA  
ATTAACAATAACAAAGGAAAAGAAGGAGGAACCTCAGGACTGTAAGATTGCTCCTTTGATGGTGGCATA  
ATGTTGAAAAGAGAACTGGTTTCGAAAAACAGATTTTACCAGTAGCTGCGGGAACAAGCAGCGTATATA  
TCGAAGTATTGCATTTGACTCAAGGGACCTGCTGGGAACAAATGTACACACCGGGAGGGNAAGTGAGAAA  
TGATGATGTTGATCAGAGTTGATCATTGCTGCTAGAAAATATCGTTAGGAGAGCAACAGTATCAGCAGAC  
CCATTGGCTTCGCTCTTGAAATGTGCCAGTACACAAATGGCGGGGTAAGGATGGTAGACATTCTTA  
GACAGAACCCAACAGAAGGAAAGCCGTGGATATATGCAAAGCAGCAATGGGTTTAAAGATCAGTTCATC  
CTTCAGCTTTGGAGTTTCACTTTCAAAGAACAAGTGGATCGTCTGTCAAAGAGAGAAGAAGTGTCTC  
ACAGGCAACCTCCAAACACTGAAAATAAGAGTACATGAAGGATATGAGGAATTCACAATGGTTGGACGGA  
GAGCTACAGCCATTTAAGGAAAGCAACCAGAAGGCTGATCCAATTAATAGTGAAGGAGACGAGCA  
GTCAATCGCTGAAGCAATCATAGTGGCAATGGTTTCTACAAGAGGACTGCATGATAAAGCAGTACGA

GGTGATCTGAACTTTGTCAATAGAGCAAATCAGCGACTAAATCCTATGCATCAACTTCTGAGGCATTCC  
AAAAGGATGCAAAAGTGCTGTTTCAAACCTGGGGGATTGAACCAATTGACAATGTAATGGGGATGATTGG  
AATACTGCCTGCATGACCCCCAGCAGCGAGATGTCCTGAGAGGAGTGAGAGTCAGCAAAATGGGAGTG  
GATGAATATCCAGTACTGAGAGAGTGGTCGTGAGCATTGATCGTTTCTTGAGAGTCCGAGATCAAAGAG  
GAAACGTGCTCCTGTCTCCTGAGGAAAGTTAGTGAAACACAGGGAACAGAGAACTGACGATAACATATTC  
ATCGTCCATGATGTGGGAAATCAATGGTCCGGAATCCATGCTAGTCAACACATATCAATGGATCATCAGA  
AATTGGGAGACTGTGAAGATCAATGGTCCCAAGACCCTACGATGTTGTACAACAAGATGGAATTTGAGC  
CCTTCCAATCCTTGGTGCCAGGGCTGCCAGAGGCCAGTATAGTGGATTGTGAGGACATTGTTCCAGCA  
GATGCGTGATGTGCTGGGAACATTTGATACTGTCCAATAATAAAGCTCCTGCCTTTTCTGTCAGCCCCA  
CCGGAACAGAGTAGGATGCAGTTTTCTCTGACTGTGAACGTAAGAGGTTACAGGAATGAGAATACTTG  
TGAGAGGCAACTCCCCTGTGTTCAACTATAACAAGGCCCAAGAGACTCACAGTTCCTGGAAAGGATGC  
AGGTGCCTTGACAGAAGATCCAGATGAGGGAACAGCAGGAGTAGAGTCTGCAGTATTAAGAGGATTCTA  
ATTCTGGGCAAAGAGGACAAAAGATATGGACCAGCATTGAGCATCAACGAACTGAGCAATCTTGCAAAAG  
GGGAAAAGGCTAATGTGTTGATAGGGCAAGGAGACGTGGTGTGGTAAATGAAACGGAAACGGGACTCTAG  
CATACTTACTGACAGCCAGACAGCGACAAAAGAATTGGGATGGCCATCAATTAGTGTGAATTGTTAA  
AAACGA

>iavh1n11922|A/Barry/3792/2022|EPI\_ISL\_15391170|A/Barry/3792/2022|PB2|1||A/Barry/3792/2022  
ATCAGCAAAGCAGGTCAATATATTCAGCATGGAAAGAATAAAAGAACTACGGAACTAATGTGCGCAGT  
CCCGCACTCGCGAGATACTGACAAAAACACAGTGGACCATATGGCCATAATTAAGAAGTACACATCGGG  
GAGACAGGAAAAGAACCCTGACTTAGAATGAAATGGATGATGGCAATGAAATATCCAATTAAGTCTGAC  
AAAAGGATAACAGAAATGGTCCGGAGAGAAATGAACAAGGACAACTCTATGGAGTAAATGAGTGATG  
CTGGATCAGACAGAGTGATGGTATCACCTTTGGCTGTAACATGGTGGAAATAGGAATGGACCCGTGACAGA  
TACGGTCCATTACCCAAAAGTGACAAAACCTTATTTCCGACAAAGTCGAAAGGTTAAACATGGAACCTTT  
GGCCAGTCCATTTAGAAATCAAGTCAAATACGAAGAAGAGTAGACATAAATCCTGGTATGCAGACC  
TCAGTGTAAAGAGGCACAAGATGTAATTATGGAAGTTGTTTTCCCAATGAAGTGGGAGCCAGAATACT  
AACATCAGAATCACAGCTAACAAATAACTAAAGAGAAAAAGAAAGAACTCCGAGATGCAAAAATTTCTCCC  
TTGATGGTGCATACATGCTAGAGAGAGAACTTGTGCGGAAAACAAGATTTCTCCAGTTGCTGGCGGAA  
CAAGCAGCATATACATTGAAGTTTTACATTTGACTCAAGGAACGTGTTGGGAACAATGTACTCCAGG  
TGGAGGAGTGAGGAATGACGATGTTGACCAAAGCTTAATATTGCGGCCAGGAACATAGTAAGAAGAGCC  
GCAGTGTACGAGATCCACTAGCATCTTTATTGGAGATGTGCCACAGCACGCAAATGGCGGAACAAGGA  
TGGTGGACATTCTAGACAAACCCGACTGAAGAACAGGCTGTGGATATATGCAAAGCTGCAATGGGATT  
GAGAATCAGCTCATCTTTCAGCTTGGTGGCTCACATTTAAAAGAACGAGCGGGTCTGTCAGTCAAAGA  
GAGGAAGAGGTTCTACAGGCAATCTCCAGACATTGAGAATAAGAGTACATGAGGGGTATGAGGAGTTCA  
CAATGGTGGGAAAAGAGCAACAGCTATACTAAGAAAAGCAACCAGAAGACTGGTTCAACTCATAGTGAG  
TGGAAGAGACGAACAGTCAATAGCCGAAGCAATAATCGTGGCCATGGTGTTCACAAGAAGATTGCGTG  
ATAAAAGCAGTTAGAGGTGACCTGAATTTGTCAACAGAGCAAAATCAGCGGTTGAACCCCATGCATCAGC  
TTTTAAGGCATTTTCAGAAAGATGCGAAAGTACTCTTTCAAATTTGGGGAGTTGAACACATCGACAGTGT  
GATGGGAATGGTTGGAGTATTACCAGATATGACTCCAAGCACAGAGATGTCATGAGAGGAATAAGAGTC  
AGCAAGATGGGTGGATGAATACTCCAGTACAGAGAGGGTGGTGGTTAGCATTGATCGTTTTTGAGAG  
TTCGAGACCAACGTGGGAATGATATATCTCCTGAGGAGGTGAGTAAACACAGGGAACTGAAAGACT  
GACCATAACTTATTCATCATCGATGATGTGGGAGATTAACGGCCCTGAGTGCATTTTGGTCAATACCTAC  
CAATGGATCATCAGGAATGGGAAGCTGTCAAATTCATGGTCTCAGAACCCTGCAATGTTGTACAACA  
AAATGGAAATTTGAACCATTTCAATCTTTAGTCCCAAGGCCACTAGAAGCCAATCAGTGGGTTTGTGAG  
AACTCTATTCACAACAATGAGAGACGTACTTGGGACATTTGACTGCCCAGATAATAAAGCTTCTCCCT  
TTTGCAGCTGCTCCACCGAAGCAAAGCAGAATGCAGTTCTTCTACTGACTGTGAATGTGAGGGGATCAG

GGATGAGAATACTTGTAAAGGGCAATTCTCCTGTATTCAACTACAACAAGACCACTAAAAGGCTAACAAT  
TCTTGGAAAAGATGCCGGCACTTTAATTGAAGACCCAGATGAAAGCACATCCGGAGTGGAGTCCGCCGTC  
TTGAGAGGGTTCTCATTATAGGTAAGGAAGACAGAAGGTACGGACCAAGCATTAAAGCATCAATGAACGTGA  
GTAACCTTGGAAAAGGGGAAAAGGCTAATGTGCTAATTGGGCAAGGAGACGTGGTGTGGTAAATGAAACG  
GAAACGGGACTCTAGTATACTTACTGACGCCAGACGACGACCAAAAAGAATTCGGATGGCCATCAATTAA  
TACTGAATAGTTTAAAAACGACCTTGTCTACTGATC

>BEL12092022\_H1N1\_PB2\_1

ATGGAGAGAATAAAAGAACTAAGAGATCTAATGTCGCTGTCTCGCACTCGCGAGATACTACCCAAAACCA  
CTGTGGACCACATGCCATAATCAAAAATACACATCGGGAAAGGCAAGAGAAGAACCCTCGCACTAAGGAT  
GAAATGGATGATGGCAATGAAATATCCAATCACTGCAAGATAAGAGAATAATGAAATGATTCTGAAAAGG  
AATGAGCAGGGACAAAACCTTTGGAGCAAAACAACGATGCCGGATCAGACCGGGTAATGGTATCTCCTC  
TCGCTGTGACGTGGTGAACAGGAATGGACAGCAGCAAGTACAGTCCACTACCCAAAGGTATACAAAAC  
TTATTTTGAAGAGGTAGAGAGATTGAAAAACGGGACCTTTGGCCCTGTCCACTTCAGAAATCAAGTTAAG  
ATAAGACGGAGGGTTCGATGTAACCCAGGCCATGACGACCTAAGTCCAAAGAGGCACAGGATGTAATCA  
TGGAAAGTTGCTTCCCAATGAGGTGGAGCGAGAATATTGACGTGAGAGTCACTCAACTGACGGTAACAAA  
GGAGAAGAAGAAGAACTCCAGGACTGCCAAATGCCCTTTGATGTTGCATATGCTAGAGAGGGAA  
TTGGTCCGGAAGACAAGGTTCTCCAGTGGCTGGTGGAAACAAGCAGTGTCTATATTGAGGTGCTACACT  
TAACCCAGGGGACATGCTGGGAGCAGATGTATACTCCAGGAGGAGAGGTGAGAAATGATGATGTTGACCA  
GAGCTTGATTATTGCTGCCAGGAACATAGTGAGAAGAGCAACAGTATCAGCAGACCCACTAGCATCTCTA  
CTGGAATGTGCCACAGCACACAGATTGGAGGAGTAAGGATGGTTCGACATCCTTCGACAAAATCCAACAG  
AAGAACAAGCCGTGGACATATGCAAGGCAGCAATGGGATTAAGGATTAGCTCATCTTTCAAGTTTGGTGG  
ATTCACCTTTTAAAAGAACAAGTGGATCTTCAGTAAAAAGAGAAGAAGAAGTGTACGGGCAACCTCAAA  
ACACTGAAAATAAGAGTGCATGAGGGGTATGAAAGTTTACAATGTTAGGAAGACGAGCAACTGTATCA  
TCAGGAAAGCAACCAGGAGGCTGATCCAGCTAATAGTAAGCGGGAGGGACGAGCAGTCAATTGCTGAAGC  
AATAATTGTGGCCATGGTGTCTCACAGGAGGATGGTATGATCAAGGCAGTTCGAGGTGATCTGAATTTT  
GTCAATAGGGGCAACTAGAGGCTGAACCCAATGCATCAACTCCTAAGACACTTTCAAAGGATGCAAAAA  
TACTTTTCAAAAACCTGGGGGATCGAACCCATTGACAGTGTGATGGGGATGATTGGGATATTGCCCGACAT  
GACCCCAAGTACTGAGATGTCGCTGAGGGGGATAAGAGTCAGTAAGACAGGAGTAGATGAATATCCAGC  
ACAGAAAGGGTCGTAGTGAGCATCGACCGATTTTAAAGAGTTCGAGACCAAGAGGGAACATACTACTGT  
CACCTGAAGAAGTCAGCGAGACACAGGGAACAGAGAAATTGACAATCACCTATTCTGTCGTCATGATGTG  
GGAGATCAATGGCCTTGAGTCGGTGTGATAAATACTTATCAGTGGATCATCAGAAAACCTGGAAAACCTGTG  
AAAATCCTATGGTACAGGACCCCAATGTTATATAACAAGATGGAATTCGAACCATTCGAATCTCTTG  
TCCCTAGGGCAGCTAGAGGTCAATACAGTGGATTCTGAGGACATTTCCAGCAGATGCGGGATGTGCT  
TGGAACATTTGACACTGTTTCAGATAATAAACTCCTCCATTGCTGCTGCCCCACCAGAACAAAGTAAG  
ATGCAGTTCTCTCCATGACTGTAATGTAAGAGGATCAGGAATGAGAATACTGGTAAGAGGCAACTCCC  
TGGTGTTCATTAACAATAAGGCCACCAAGAGGCTCACTATTCTCGGAAAGATGCAGGTGCATTGACCGA  
AGATCCAGATGAAGGCACCGCTGGAAATAGAGTCTGCTGTTTTAAGAGGATTCTCATTTTGGCAAAAGAA  
GACAAGAGATACGGCCCTGCATTGAGCATCAACGAGCTGAGCAATCTTGCAAAGGGAGGGAAAGGCTAATG  
TGCTAATTGGGCAAGGAGACGTAGTGTGGTAAATGAAACGGAACGGGACTTTAGCATACTTACTGACAG  
TCAGACAGCGACCAAAAAGAATTCGGATGGCCATCAATTAG

>BYM12092022\_H1N1\_PB2\_1

ATGGAGAGAATAAAAGAACTAAGAGATCTAATGTCACAGTCTCGCACTCGCGAGATACTCACTAAGACCA  
CTGTGGACCACATGCCATAATTAAGAAAATACACATCAGGAAGGCAAGAGAAGAACCCTCGCACTAAGGAT  
GAAATGGATGATGGCAATGAAATACCAATCACCGCAGATAAGAGAATAATGAAATGATTCCAGAAAGG  
AATGAGCAGGGACAAAACCTTTGGAGTAAAACAACGATGCCGGATCGGACCGAGTAATGGTATCGCCTC

TCGCCGTGACATGGTGAACAGGAATGGACCAACAGCAAATACAGTCCACTACCCAAAGGTATACAAAAC  
TTATTTTGAAAAGTTGAGAGATTGAAACACGGGACCTTTGGCCCTGTCCACTTCAGAAATCAAGTTAAG  
ATAAGACGGAGGGTTGATGTAACCCAGGCCATGCAGACCTAAGTGCCAAAGAGGCACGGGATGTAATCA  
TGGAAAGTTGCTTCCCAAACGAGGTTGGGGCAAGAATACTGACGTGAGAGTCACAAGTACAGTAACAAA  
GGAGAAAAAAGAGAGCTCCAGGACTGCAAATGCCCCCTTGATGGTGCCATATATGCTAGAGAGGGAA  
TTGGTCCGGAAGACAAGGTTCTCCAGTGGCTGGTGAACAAGCAGTGTCTATATTGAGGTGCTGCATT  
TAACCCAGGGGACATGCTGGGAGCAGATGTACTCCAGGAGGAGGTTGAGGAACGATGATGTAGACCA  
GAGCTTGATTATAGCTGCCAGAAACATAGTGAGAAGAGCAACAGTATCAGCAGACCCACTAGCATCCCTG  
CTGGAATGTGCCACAGCACACAGATTGGAGGGGTAAGGATGGTCGACATCCTTAGACAAAATCCAACAG  
AAGAACAAGCAGTGGACATATGCAAGGCAGCAATGGGGTTAAGGATTAGCTCATCTTTCAGCTTTGGTGG  
ATTCACCTTTAAAAGGACAAGTGATCTTCAGTCAAGAAAAGAAGAAGTGCTTACGGGCAACCTTCAA  
ACATTGAAAATAAGAGTGCATGAGGGGTATGAAGAGTTCACAATGGTAGGAAGACGAGCAACTGCTATTC  
TCAGGAAGGCAACAGGAGCTGATCCAGCTAATAGTAAGTGGGAGAGACGAGCAGTCAATTGCTGAAGC  
AATAATTGTGGCCATGGTGTCTCACAGGAGGACTGCATGATCAAGGCAGTTCGAGGTGATCTGAATTTT  
GTCAATAGAGCGAACAGAGGCTGAACCAATGCATCAGCTCCTAAGACATTTCAAAGGATGCAAAG  
TGCTTTTCAAACCTGGGGAAATCGAACCCATTGACAGTGTGATGGGGATGATTGGGATAGTGGCCGAC  
GGCCCCAAGTACTGAGATGTCGCTGAGGGGATAAGAGTCAGCAAGACGGGAGTAGATGAATACTCCAGC  
ACAGAAAGGGTCGTAGTAGCATCGACCGATTCTAAGAGTTCGAGACCAAAGAGGGAACATACTATTGT  
CACCTGAGGAAGTCAGCGAGACACAGGGAACAGAGAAATTGACAATCACTTATTGCTGCTCAATGATGTG  
GGAAATCAATGGTCTGAGTCACTGTTAGTCAATACTTATCAGTGGATCATCAGAACTGGGAACTGTG  
AAAATTCATAGTGCAGGATCCACAGTATATATAACAAGATGGAATTCGAACCATCCAATCTCTTG  
TCCCTAAGGCAGTAGGGTCAATACAGTGGATTCTGAGGACTTTATTCCAGCAAATCGGGATGTGCT  
TGGAACATTTGACACTGTTGAGATAATAAACTCCTCCCATTTGCTGCTGCCCGCCAGAACAAAGTAGG  
ATGGAATTCCTCCATGACTGTAATGTAAGAGGGTCACTGATGAGAATACTGGTGAGAGGCAACTCTC  
CAGTATTCAATTACAATAAGGCCACCAACGACTTACAGTTCTCGGGAAAGATGACAGGTGCATTGACCGA  
AGATTGAGATGAAGGCACAGCTTGAATAGAGTCTGCTGTTTCAAGAGGATTCTCATTTTGGCAAAGAA  
GACAAGAGATATGGCCGGCATTGAGCATCAATGAGCTGAGCAATTTGCAAAGGGAGAGAAGGCTAATG  
TGCTAATTGGGCAAGGAGACGTAGTGTGGTAAATGAAACGGAACGGGACTCTAGCATACTACTGACAG  
TCAGACAGCGACCAAAAAGAAATTCGGATGGCCATCAATTAG

>CRG12092022\_H1N1\_PB2\_1

NNNNNNNNNATAAAAGAACTAAGAGATCTAATGTCACAGTCTCGCACTCGCGAGATACTCACCAGACCA  
CTGTGGACACATGGCCATAATTAAGAAAATACACATCGGGAAGGCAAGAGAAGAACCCTCGCACTCAGAAT  
GAAATGGATGATGGCAATGAAATATCCAATCACCGCAGATAAGAGAATAATGAAATGATTCTGAAAAGG  
AATGAGCAGGGACAAAACCTCTGGTGCAAAACAACGATGCCTGATCAGATCGAGTGACGGCATCGCCTC  
TCGCTGCGACGTGGTGGAAACAGGAATGGACCAACAGCAAATACAGTCCACTACCCAAAGGTATAAAAAAC  
TTATTTTAAAAAAGTTGAGAGATTGAGACACGGTACCTTCGGACCTGTCCACTTCAGAAATCAAGTTAAG  
ATAAGAAGGAGGGTCGATGTAACCCAGGCCATGCAGATCTCAGTGCCAAGGAGGCACAGGATGTAATCA  
TGGAAAGTTGCTTCCCAAACGAGGTTGGGGCAGAATACTGACGTGAGAGTCACAAGTACAGTAACAAA  
GGAGAAAAAGAGGAACTCCAGGATTGCAAATGCTCCCTTGATGGTGGCGTATATGCTAGAAAAGAGAA  
TTGGTCCGGAAGACAAGGTTCTCCAGTGGCTGGTGAACAAGCAGTGTCTATATTGAGGTGCTGCACT  
TAACCCAGGGAAACATGCTGGGAGCAGATGTACTCCAGGAGGAGAGGTTGAGAAACGATGATGTAGACCA  
GAGCTTGATTATAGCTGCCAGAAACATAGTGAGAAGAGCAACAGTATCAGCAGACCCACTAGCATCCCTC  
CTGGAATGTGCCACAGCACACAGATTGGAGGGGTAAGGATGGTCGACATCCTTCGACAAAATCCAACAG  
AAGAACAAGCAGTGGACATATGCAAGGCAGCAATGGGGTTAAGGATTAGCTCATCTTTCAGCTTTGGTGG  
ATTCACCTTTAAAAGAACAGTGATCTTCAGTAAAAAGAGAAGAAGTGCTAACGGGCAACCTTCAA  
ACATTGAAAATAAGAGTGCATGAGGGGTATGAAGAGTTCACAATGGTAGGAAGATGAGCAACTGCCATTA

TCAGGAAGGCAACCAGGAGGCTGATCCAGCTAATAGTAAGTGGGAGAGACGAGCAGTCAATTGCTGAAGC  
AATAATTGTGGCCATGGTGTCTCACAGGAGGACTGCATGATCAAGGCAGTTCGAGGTGATCTGAATTTT  
GTCAATAGGGCGAACCAGAGGCTGAACCCAATGCATCAACTCCTAAGACATTTTCAAAGGATGCAAAA  
TGCTTTTTCAAACCTGGGGAATCGAACCCATTGACAGTGTGATGGGGATGATCGGGATATTGCCGACAT  
GACCCCAAGTACTGAGATGTCGCTGAGAGGGATAAGAGTCAAGCAAGACGGGAGTAGATGAATACTCCAGC  
ACAGAAAGGGTGGTAGTGAGCATCGACCGATTCTTAAGAGTTCGAGACCAAAGAGGGAACATACTATTGT  
CACCTGAAGAAGTCAGCGAGACACAAGGAACAGAGAAATTGACAATCACTTATTCGTATCAATGATGTG  
GGAGATCAATGGTCTGAGTCGGTGTAGTCAACACATATCATTGGATAATCAGGAACTGGGAAATTGTG  
AAAATCCAATGGTCACAAGATCCACAATGTTATATAACAAAATGGAATTCGAACCATCCAATCTCTTG  
TCCCTAAGGCAGCTAGGGGTCAATACAGTGGATTCTGAGGACATTATTCAGCAAATGCGGGATGTGCT  
TGGAACATTTGACACTGTTGAGATAATTAACCTTCTCCATTTGCTGCTGCCCTGCCAGAACAAAGTAGG  
ATGCAGTTTTCTCAATGACTGTAATGTAAGAGGATCAGGGATGAGAATACTGGTGAGAGGCAACTCTC  
CAGTGTTC AATTACAACAAGGCCACAAAGGACTCACTATTCTGGGAAAAGATGCAGGTGCATTGACCGA  
AGATCCAGATGAAGGCACAGCTGGAATAGAGTCTGCTGTTTTAAGAGGATTTCTCATTTGGGCAAAGAA  
GACAAGAGATATGGCCGCTTGGAGCATCAATGAGCTGAGCAATCTGCAAAAAGGAGAGAAGGCTAATG  
TGCTAATTGGGCAAGGAGACGTAGTGTGGTAATGAAACGGAACGGGACTCTAGCATACTTACTGACAG  
TCAGACAGCGACCAAAAAGAATTGGATGGCCATCAATTAG  
>BYM28112022\_H3N2\_PB2\_1  
ATCAGCAAAGCAGGTCAATTATATTCAGCATGGAAAAGAATAAAAAGAACTACGGAATCTAATGTCCCGGT  
CCCGCACTCGCGAGATACTGACAAAAGCCACAGTGAGCCATATGGCCATAATTAAGAAGTACACATCGGG  
GAGACAGGAAAAGAACCCTGCTACTTGAATGAAATGGATGATGGCAATGAATATCCAATTACTGCTGAC  
AAAAGGATAACAGAAATGGTTCGGGAGAGAAATGAACAAGGACAAACTCTATGGAGTAAAATGAGTGATG  
CTGGATCAGACAGAGTATGGTATCACCTTTGGCTGTAACATGGTGGACTAGGAATGGACCCGAGACAGA  
TACGGTCCATTACCCAAAAGTGACAAAACCTTATTTGACAAAAGTCGAAAAGTTAAAACATGGAACCTTT  
GGCCCTGTCCATTTAGAAATCAAGTCAAATAACGAAGACGAGTAGACATAAATCCTGGTATGCAGACC  
TCAGTGCCAAAAGAGGCACAAGATGTAATTATGGAAGTTGTTTTCCCAATGAAGTGGGAGCCAGAATACT  
AACATCAGAATCACAGCTAACATAACTAAAGAGAAAAAGAAGAAGTCCGAGATGCAAAAATTTCTCCC  
TTGATGGTGCATACATGCTAGAGAGAGAACTTGTGCGGAAAACAAGTTTTCTCCAGTTGCTGGCGGAA  
CAAGCAGTATATACATTGAAGTTTACATTTGACTCAAGGAACGTGTTGGGAACAAATGTACTCCAGG  
TGGAGGAGTGAGGAATGACGATGTTGACCAAAGCCTAATTATTGCGGCCAGGAACATAGTAAGAAGAGCC  
GCAGTGTACGACAGCCCACTAGCATCTTTATTGGAGATGTGCCACAGCACGCAAATGGCGGAACAAGGA  
TGGTGGACATTCTTAGACAGAACCCGACTGAAGAACAGGCTGTGGATATATGCAAAGCTGCAATGGGATT  
GAGAATCAGCTCATCTTTAGCTTTGGTGGCTTACATTTAAAAGAACGAGCGGGTCTGTCAGTCAAAGA  
GAGGAAGAGGTTCTTACAGGCAATCTCCAGACATTGAGAATAAGAGTACATGAGGGGTATGAGGAGTTCA  
CAATGGTGGGAAAAGGGCAACAGCTATACTTAGAAAAGCAACCAGAAGACTGGTTCAACTCATAGTGAG  
TGGAAGAGACGAACAGTCAATAGCCGAAGCAATAATCGTGGCCATGGTGTTCACAAGAAGATTGCGTG  
ATAAAAAGCAGTTAGAGGTGACCTGAAATTTGTCAACAGAGCAAATCGCGGTTTCAGACCTTTGCATCAGC  
TTTTAGAGCATTTTCAGAAAAGATGCGAAAGTACTCTTTCAAATTTGGGGAGTTGAACACATCGACAGTGT  
GATAGGAATGGTTGGCTCTTACCAGATATGACTCCAAGCACAGAGATGTCATGAGAGGAATAAGAGTC  
AGCAAATGGGTGTGGATGAATACTCCAGTACAGAGAGGGTGGTGGTTAGCGATGGTCGGTTTTGAGAG  
TTAGAGACCAACGTGGGAATGATATATATCTCCTGAGGAGGTGAGTGAACACAGGAACTGAAAAGACT  
GACCATAACTTATTCATCATCGATGATGTGGGAGATTAACGGCCCTGAGTCGGTTTTGGTCAATACCTAT  
CAATGGATCATCAGAAATGGGAAGCTGTCAAATTCATGGTCTCAGAACCCTGCAATGTTGTACAACA  
AAATGGAAATTTGAACCATTTCAATCTTTAGTCCCAAGGCCACTAGAAGCCAATCAGTGGGTTTGTGAG  
AACTCTATTCACAACAATGAGAGACTTGCTCGGGACATTTGACACTGCCAGATAATAAAGCTTCTCCCT  
TTTGCAGCTTCTCCACCGAAGCAAGCAGAATGCAGTTCTTTACTGACTGTGAATGTGAGGGGATCAG

GGATGAGAATACTTGTAAGGGCAATTCTCCTGTATTCAATTACAACAAGACCACTAAAAGGCTAACAAAT  
TCTTGGAAAAGATGCCGGCACTTTAATTGAAGACCCAGATGAAAAGCACATCCGGAGTGGAGTCCGCCGTC  
TTGAGAGGGTTCTCATTATAGGTAAGGAAGACAGAAGATACGGACCAGCATTAAAGCATCAATGAAGTGA  
GTAACGCTGCAAAAGGGGAAAAGGCTAATGTGCTAATTGGCAAGGAGACGTGGTGGTAAATGAAACG  
GAAACGGGACTCTAGTATACTTACTGACAGCCAGACGACGACCAAAAGAATTTCGGATGGCCATCAATTA  
TACTGAATAGTTTTAAAAACGACCTTGTCTACTGATC

>NC\_026435.1 Influenza A virus (A/California/07/2009(H1N1)) segment 2 polymerase PB1 (PB1) gene, complete cds; and nonfunctional PB1-F2 protein (PB1-F2) gene, complete sequence

ATGGATGTCAATCCGACTCTACTTTTCTAAAAATTCAGCGCAAATGCCATAAGCACCACATCCCTT  
ATACTGGAGATCCTCCATACAGCCATGGAACAGGAACAGGATACACCATGGACACAGTAAACAGAACACA  
CCAATACTCAGAAAAGGAAAGTGGACGACAAACACAGAGACTGGTGACCCCAAGCTCAACCCGATTGAT  
GGACCACTACCTGAGGATAATGAACCAAGTGGGTATGCACAAACAGACTGTGTTCTAGAGGCTATGGCTT  
TCCTTGAAGAATCCCACCCAGGAATATTTGAGAATTCATGCCTTGAACAATGGAAGTTGTTCAACAAAC  
AAGGGTAGATAAATACTCAAGTTCGCGCACTTATGATTGGACATTAACAGAAATCAACCCGGCAGCA  
ACTGCATTGGCCAACCCATAGAAGTCTTAGATCGAATGGCCTAACAGCTAATGAGTCAGGAAGGCTAA  
TAGATTTCTAAAGGATGTAATGGAATCAATGAACAAAGAGGAAATAGAGATAACAACCCACTTTCAAAG  
AAAAAGGAGAGTAAGAGACAACATGACCAAGAAGATGGTACGCAAAGAACAATAGGGGAAGAAAAACAA  
AGACTGAATAAGAGAGGCTATCTAATAAGAGCACTGACATTAATACGATGACCAAGATGCAGAGAGAG  
GCAAGTTAAAAAGAAGGGCTATCGAACACCTGGGATGCAGATTAGAGGTTTCGTATACTTTGTTGAAAC  
TTTAGCTAGGAGCATTTCGAAAAGCTTGAACAGTCTGGGCTCCCAAGTAGGGGGCAATGAAAAGAAGGCC  
AAACTGGCAAATGTTGTGAGAAAGATGATGACTAATTCACAAGACACAGAGATTTCTTTCACAATCACTG  
GGGACAACACTAAGTGGAAATGAAAATCAAAATCCTCGAATGTTCTGGCGATGATTACATATATCACCCAG  
AAATCAACCCGAGTGGTTGAGAAACATCCTGAGCATGGCACCATAATGTTCTCAAACAAAATGGCAAGA  
CTAGGGAAAGGGTACATGTTTCGAGAGTAAAAGAATGAAGATTGAAACACAATACCAGCAGAAATGCTAG  
CAAGCATTGACCTGAAGTACTTCAATGAATCAACAAAGAAGAAAATTGAGAAAATAAGGCCTCTTCTAAT  
AGATGGCACAGCATCACTGAGTCTGGGATGATGATGGGCATGTTCAACATGCTAAGTACGGTCTTGGGA  
GTCTCGATACTGAATCTTGGACAAAAGAAATACACCAAGACAATATACTGGTGGGATGGGCTCCAATCAT  
CCGACGATTTTGCTCTCATAGTGAATGCACCAAAACCATGAGGGAATCAAGCAGGAGTGGACAGATTCTA  
CAGGACCTGCAAGTTAGTGGGAATCAACATGAGCAAAAAGAAGTCTATATAAATAAGACAGGGACATTT  
GAATTCACAAGCTTTTTTATCGTATGGATTTGTTGGCTAATTTAGCATGGAGCTACCCAGCTTTGGAG  
TGTCTGGAGTAAATGAATCAGCTGACATGAGTATTGGAGTAACAGTGATAAAGAACAACATGATAAACAA  
TGACCTTGGACCTGCAACGGCCAGATGGCTTCAATTGTTTCATCAAGACTACAGATACACATATAGG  
TGCCATAGGGGAGACACACAAAATTCAGACGAGAAGATCATTGAGTTAAAGAAGCTGTGGGATCAAACCC  
AATCAAAGGTAGGGCTATTAGTATCAGATGGAGGACCAAACTTATACAATATACGGAATCTTCACATTC  
TGAAGTCTGCTTAAATGGGAGCTAATGGATGATGATTATCGGGGAAGACTTTGTAATCCCTGAATCCC  
TTTGTCAAGTATAAAGAGATTGATTCTGTAAACAATGCTGTGGTAATGCAGCCATGGTCCAGCCAAAA  
GCATGGAATATGATGCCGTTGCAACTACACATTCCTGATTCCCAAGGGAATCGTTCTATTCTCAACAC  
AAGCCAAAGGGGAATTTCTGAGGATGAACAGATGTACCAGAAGTGTGCAATCTATTTCGAGAAATTTTT  
CCTAGCAGTTTATATAGGAGACCGGTTGGAATTTTAGCATGGTGGAGGCCATGGTGTCTAGGGCCCGGA  
TTGATGCCAGGTCGACTTCGAGTCTGGACGGATCAAGAAAGAAGTCTCTGAGATCATGAAGATCTG  
TTCCACCATTGAAGAAGCTCAGACGGCAAAAATAA

>MF575267.1 Influenza A virus (A/black-headed gull/Netherlands/31/2014(H13N6)) segment 2 polymerase PB1 (PB1) and PB1-F2 protein (PB1-F2) genes, complete cds

AGCAAAAGCAGGCAAACCAATTTGAATGGATGTCAATCCGACTTTACTTTTCTTGAAGTGCCAGCGCAA  
ATGCTATAAGTACTACATTCCTTATACTGGTGACCTCCATACAGCCATGGAACAGGAACAGGATATAC  
CATGGACACAGTCAACAGAACACACCCAGTACTCAGAAAAGAAACATGGACAACAAACCCGAAACTGGA  
GCACCTCAGCTTAAACCGATCGATGGACCACTACCGAAGGATAATGAGCCAAGCGGATATGCACAAACGG  
ATTGTGATTGGAGGCCATGGCTTCTCGAAGAATCCCATCCAGGGATCTTGAAGAACTCATGCTTGA

AACGATGGAAGTTGTTTCAGCAAACACGAGTGGACAAGCTGACCCAAGGCCGACAAACATATGATTGGACA  
TTGAATAGAAACCAGCCAGCTGCAACCGCTTTAGCCAACACCATAGAGGTATTTCAGATCGAACGGTCTAA  
CAGCTAATGAATCGGGGAGACTCATTGATTTCCCTTAAGGATGTGATGGATTCAATGGATAAAAAAGGAAT  
GGAAATAACAACACATTTCCAAGAAAAAGGAGAGTAAGGGACAACATGACCAAGAAAATGGTCACACAA  
AGAACAAATAGGGAAAAAGAAAACAGAGATTGAGCAAAAAAAGCTACCTAATAAGGGCATTGACATTGAATA  
CAATGACCAAAAGATGCAGAAAAGAGTAAATGAAAAGGAGAGCGATTGCAACACCCGGGATGCAGATCAG  
AGGTTTCGTCTACTTCGTTGAAACACTTGCAAGGAGCATATGTGAGAAAATGAAACAGTCGGGGCTCCCA  
GTTGGAGGAAATGAGAAAAGGCTAAATGGCAAACGTTGTAAGAAAAGATGATGACTAATTCGCAAGACA  
CAGAGCTCTCCTTACAATTACTGGGGACAACACCAAGTGGAAATGAAAATCAAACCCCTCGGATGTTCT  
AGCGATGATAACATACATCACAAAGAAACAGCCTGAATGGTTCAGAAAATGTCTTGAGCATTGCCCTATA  
ATGTTCTCAAACAAAATGGCAAGACTTGGGAAAGGATATATGTTGCAAAGTAAGAGCATGAAGCTACGAA  
CACAAATACCAGCAGAAATGCTTGAAGTATTGACCTCAAATATTTCAACGAGTCAACGAGAAAAGAAAAT  
CGAGAACATAAGACCCCTCTTAATAGATGGCACAGCCTCATTGAGTCTGGAATGATGATGGGCATGTT  
AACATGTTGAGTACAGTCTTAGGAGTCTCAATCTTAAATCTTGGGCAAAAGAGGTACACCAAGACCACAT  
ACTGGTGGGATGGACTCCAATCCTCTGATGACTTGCACCTCATAGTGAATGCACCTAATCATGAGGGAAT  
ACAAGCAGGAGTGGACAGATTTTACAGAACCTGCAAATAGTTGGAATCAACATGAGTAAAAAGAAAGTCC  
TACATCAATAGAACAGGAACATTTGAATTCACAAGCTTTTTCTATCGCTATGGGTTTGTAGCTAACTTCA  
GTATGGAGCTACCAAGCTTTGGCGTATCAGGGATTAATGAGTCAGCTGACATGAGCATTGGAGTAACAGT  
GATAAAGAACAACATGATAAACACGACCTTGGACCAGCAACAGCCCAATGGCTCTTCAACTGTTTCATC  
AAGGACTACAGGTACACATATCGATGCCATAGAGGTGATACTCAAATCCAAACAAGGAGATCATTGAGT  
TGAAGAAGCTTTGGGAGCAAAACCCGTTCAAAGGCGGGGCTGCTGTTTCAGATGGAGACCAAACTATA  
TAATATCAGAAATCTCCATATCCAGAGGTCTGTCTGAAATGGGAGCTAATGGATGAAGATTATCAGGGC  
AGGCTGTGCAACCCCTCTGAATCCATTGTAAGCCATAAGGAAATGAGTCCGTAATAATGCTGTGGTAA  
TGCCAGCCCATGTCCAGCCAAAAGTATGGAATATGATGCTGTTGCAACTACACATTCCTGGGTCGCCAA  
GAGGAACCGTTCCATCCTCAACACTAGCCAAAGGGGAATCCTTGAGGATGAACAGATGATCAAAAATGC  
TGCAATCTATTCGAAAAATCTTCCCTAGCAGTTCGTACCGGAGACCAGTTGGAATTTCCAGCATGGTGG  
AGGCCATGGTATCCAGGGCCGAATGACGCACGGATTGACTTCGAATCTGGAAGGATCAAGAAAAGAA  
GTTTGTGAGATCATGAAGATCTGTTCCACCATTGAAGAGCTCAGACGGCAAAAGTAGTGAATTTTGCT  
GTCCTTCATGAAAAATGCCTTGTCTACT

>iavh1n11922|A/Mute\_Swan/Netherlands/2/2022|EPI\_ISL\_15364797|A/Mute\_Swan/Netherlands/2/2022|PB1|2||A/Mute\_Swan/Netherlands/2/2022

CAAACCATTTGAATGGATGTCATCCGACTTTACTTTTCTTAAAAGTGCCAGCGCAAGATGCCATAAGTA  
CCACATTCCCTTACACTGGAGATCCTCCATACAGCCATGGAACAGGGACAGGATACACAATGGACACAGT  
CAACAGAACACATCAATACTCAGAGAAGGGGAAATGGACAACAACACAGAAAACCGGAGCACCTCAACT  
AACCCAATTGATGGGCCACTACCTGAGGACAACGAACCGAGCGGATATGCACAAACAGATTGCGTGTGG  
AAGCAATGGCTTTCCTTGAAGAGTCCCATCCAGGGATCTTTGAAAATCTTGTCTTGAACGATGGAAGT  
CGTTCAAGCAAACAAGAGTGGACAACTAATCAAGGTCCGACACATATGACTGGACACTAAATAGAAAAC  
CAACAGCTGCAACTGCCCTGGCCAACACTATAGAGTCTTTCAGATCAAACCGTCTAACAGCCAATGAAT  
CGGGGAGACTAATAGATTTCTCAAGGATGTGATGGACTCAATGATAAAGAAAGAAATGAAATAACAAC  
ACATTTCCAGAGAAAGAGAAGAGTAAGGGACAACATGACCAAGAAAATGGTCACACAAAGAACAATAGGA  
AAGAAGAAACAAGGCTAAACAAGAGGAGCTACTTAATAAGAGCACTGACACTGAATACAATGACAAAAG  
ATGCAGAAAAGAGCAAATTAAGAGAGCGGGCGATTGCAACACCAGGGATGCAGATTAGAGGATTTGTGTA  
CTTTGTGCAAACTGGCAAGGAGCATCTGTGAAAATCTGAGCAATCTGGACTCCCGTGGAGGGGAAT  
GAGAAGAAGGCTAAATGGCAAATGTTGTGAGAAAATGATGACTAACTACAAGATACAGAGCTCTCCT  
TCACAATTAATGAGATAACACCAAATGGAATGAGAATCAAAATCCTCGGATGTTTCTGGCAATGATAAC  
ATACATTACAAGAAACCAACTGAATGGTTTAGGAATGTCTTGAGTATTGCCCTATAATGTTCTCGAAC  
AAAATGGCGAGATTGGGAAAAGGGTACATGTTTGAAGTAAGAGCATGAAGTTACGGACACAATACCTG



CAGAAATGCTTGC AAAACATTGACTTAAAATATTTCAATGAATCAACAAGAAAGAAAATCGAAAAATAAG  
GCCTCTACTAATAGATGGCACTGCCTCATTGAGTCTGGAATGATGATGGGCATGTTCAATATGCTGAGT  
ACAGTATTAGGAGTTTCAATCTAAATCTTGGGCAAAAAGAAGTACACCAAAACCATACTGGTGGGATG  
GACTCCAATCCTCTGATGATTTGCCCCATAGTAAATGCACCGAATCATGAGGGAATACAAGCAGGAGT  
GGATAGGTTCTATAGGACCTGCAAACTGGTTCGGGATCAATATGAGCAAAAAGAAAGTCTTACATAAACCGG  
ACTGGAACATTTGAGTTCACAAGCTTTTTCTATCGCTATGGATTTGTGGCTAACTTCAGTATGGAGCTGC  
CCAGCTTTGGAGTTTCTGGGATCAATGAATCAGCTGACATGAGCATTGGCATCACGGTGATAAAGAACAA  
CATGATAACAATGACCTTTGACCAGCAACAGCTCAAATGGCCCTTCAACTATTTCATCAAAGATTACAGG  
TACACGTACCGATGCCATAGAGGTGACACACAAATCAAACGAGGAGATCATTGAGCTGAAGAAGCTGT  
GGGAACAGACCCGTTCAAAGGCAGGACTGTTGGTGTGAGATGGAGGACCAAATCTATACAACATTCGGAA  
TCTCCATATCCCAGAGGCTGCTGAAATGGGAGCTAATGGACGAAGATTACCAGGGCAGGTTGTGTAAT  
CCTCTGAACCCATTTGTGAGCCATAAAGAAATGAGTCCGTAAACAATGCTGTGGTATGCCAGCCACG  
GTCCAGCCAAAAGCATGGAATATGATGCCGTTGCGACTACACACTCATGGATTCTAAAAGGAATCGTTC  
CATTCTCAATACCAGTCAAAGGGGAATTCTTGAGGATGAACAGATGTACCAGAAATGCTGCGGTCTATTC  
GAGAAATTTCCCCAGTAGTTCATACAGGAGACCAGTTGGAATTTCCAGCATGGTGGAGGCCATGGTGT  
CTAGGGCCCGAATCGATGCACGCATTGATTTGAAATCGAAGGATCAAGAAGGAAGAGTTTGTGAGAT  
CATGAAGATCTGTTCCACCATTGAAGAGCTCAGACGGCAAAAATAGTGAATTTAGCTTGCCTTCATGAA  
AAAATG >iavh1n11922|A/Barry/3792/2022|EPI\_ISL\_15391170|A/Barry/3792/2022|PB1|2||A/Barry/3792/2022  
CAGCAAAAGCAGGCAAACCATTTGAATGGATGCAATCCGACTCTATTGTTCTAAAAGTCCAGCGCAA  
AATGCCATAAGCACAACATTCCTTATACTGGAGATCTCCATACAGCCATGGAACAGGGACTGGGTACA  
CTATGGACACAGTCAACAGAACACACCAATACTCAGAGAGAGGGAAGTGGACGACAAATACAGAAAAGTGG  
GGCTCCCCAGCTCAACCAATTGATGGACACTACCTGAGGATAATGAACCAAGTGGATATGCACAAAACA  
GACTGTGCTCTGGAGGCTATGCCCTTCTTGAAGAATCCCACCCAGGTATCTTTGAAAACCTCTGCCTTG  
AAACAATGGAAGCGTTCAACAGACAAGGGTAGACAACTAACCCAAGTGCAGACTTATGATTGGAC  
ATTAACAGGAACCAACCGGAGCAACTGCATTAGCCAACACCATAGAAGTCTTTAGATCGAACGGATTA  
ACAGCTAATGAATCAGGAAGGCTAATAGATTTCTCAAGGATGTGATGGAATCAATGATAAGGAGGAAA  
TGGAGATAACAACACACTTTCAAAGAAAAGGAGAGTAAGGGACAAACATGACCAAGAAAATGTCACACA  
AAGAACAATAGGGAAGAAAAACAAGAGTGAATAAAAAGAGGCTACCTAATAAGAGCTCTGACATTGAAC  
ACGATGACCAAGGATGCAGAGAGAGGCAAATTAAGAAGAGGCTATTGCAACACCCGGATGCAAATTA  
GAGGATTCGTGATTTCTGTTGAAACTTAGCTAGAAGCATTGCGAAAAACTTGAAACAATCTGGACTTCC  
GGTTGGGGTAATGAAAAGAAGGCCAAACTGGCAAATGTTGTAAGAAAATGATGACTAATTCACAAGAC  
ACAGAGCTTTCTTTCACAATCACTGGAGACAACACTAAGTGAATGAAAATCAAACCCCGAATGTTTT  
TGGCAATGATTACATATATCAAAAAGAACCAACCTGAATGTTTCAGAAAACATCCTGAGCATCGCACCAAT  
AATGTTCTCAAACAAAATGGCAAGACTGGGAAAAGGTACATGTTGAGAGTAAGAGAATGAAGCTCCGG  
ACACAATACCTGCAGAAATGCTAGCAAGCATTGACCTGAAGTATTTCAATGAATCAACAAGGAAGAAAA  
TTGAGAAAATAAGGCCTCTTCTAATAGATGGAACAGCATCATTGAGCCCTGGAATGATGATGGGCATGTT  
CAACATGCTAAGTACAGTTTTAGGAGTCTCAATACTGAATCTTGGACAAAAGAAAATACCAAGACAACG  
TACTGGTGGGATGGGCTCCAATCCTCAGACGATTTGCCCTCATAGTGAATGCACCAATCATGAGGGAA  
TACAAGCAGGAGTGATAGATTCTATAGGACCTGCAAGTTAGTGGGAATCAACATGAGCAAAAAGAAAGTC  
CTATATAATAAAAACAGGACATTTGAATCACTAGCTTCTTTATCGATATGGATTTGTGGCTAATTTT  
AGCATGGAGCTGCCAAGTTTTGAGTGTCTGGAATAAACGAGTCAGCTGACATGAGCATTGGAGTAACAG  
TGATAAAGAACAACATGATAAATAATGACCTTGACCAGCAACAGCCCAAATGGCTCTCAAATTTGTCAT  
CAAAGATTACAGATACAGTATCGGTGCCATAGAGGAGACACACAAATCAAACAAGAAGATCATTGAG  
ATAAAGAAGCTATGGGATCAAACCAATCAAAGACAGGATATTGGTATCAGATGGGGGACCAAATTTAT  
ACAATATCCGAATCTTACATCCCTGAAGTCTGCTTGAAGTGGGAGCTGATGGACGACAATTATCGGGG  
AAGACTTTGTAATCCCTGAATCCCTTTGTACGCCATAAAGAAATGAATCTGTAACAATGCTGTAGTA



CATTGAAATTGGAGTAACACGGAGGGAAGTCCACATATATTACCTAGAGAAAGCCAACAAAATAAAATCT  
GAGAAGACACACATTTCATCTTTTCATTCACTGGAGAGGATGGCCACCAAGCGGACTACACCCTTG  
ACGAAGAGAGCAGGGCAAGAACTCAAACACTAGGCTTTTCACTATAAGACAAGAAATGGCCAGTAGGAGTCT  
ATGGGATTCCTTCGTCAGTCCGAAAGAGGCGAAGAGACAATTGAAGAAAAATTTAGATTACAGGAACT  
ATGCGCAAGCTTGCCGACCAAAAGTCTCCACCGAACTTCCCGAGCCTTGAAAACTTTAGAGCCTATGTAG  
ATGGATTGAGCCGAACGGCTGCATTGAGGGCAAGCTTTCCCAAATGTCAAAGAAGTGAACGCCAAAAT  
TGAACCATTCTTGAGGACGACACCAGCCCCCTCAGATTGCCTGATGGGCCTTTTGCCATCAGCGGTCA  
AAGTTCCTGCTGATGGATGCTCTGAAATTAAGTATTGAAGACCCGAGTCACGAGGGGGAGGGAATACCAC  
TATATGATGCAATCAAATGCATGAAGACATCTTTGGCTGGAAGAGCCTAACATAGTCAAACCACATGA  
GAAAGGCATAAATCCCAATTACCTCATGGCTTGGAAAGCAGGTGCTAGCAGAGCTACAGGACATTGAAAA  
GAAGAGAAGATCCCAAGGACAAGAATGAAGAGAACAAGCCAATTGAAGTGGGCACTCGGTGAAAATA  
TGGCACCAGAAAAAGTAGACTTTGATGACTGCAAAGATGTTGGAGACCTTAAACAGTATGACAGTGATGA  
GCCAGAGCCAGATCTCTAGCAAGCTGGTCCAAAATGAATCAATAAGGCATGTGAATTGACTGATTCA  
AGCTGGATAGAACTTGATGAAATAGGAGAAGATGTTGCCCGATTGAACATATCGCAAGCATGAGGAGGA  
ACTATTTACAGCAGAAGTGTCCACTGCAGGGCTACTGAATACATAATGAAGGGAGTGTACATAAATAC  
GGCCTTGCTCAATGCATCCTGTGACGCCATGATGACTTTCAGCTGATCCCAATGATAAGCAAATGTAGG  
ACCAAAGAAGGAAGACGGAACAACTGTATGGGTTTATTATAAAGGAAGGTCTCATTGAGAAATG  
ATACTGATGTGGTGAACCTTGTAAAGTATGGAGTCTCACTCACTGACCCGAGACTGGAGCCACACAAATG  
GGAAAAACTGTGTTCTTGAAATAGGAGACATGCTTGAAGACTGCGATAGGCCAAGTGTGAGGCC  
ATGTTCTATATGTGAGAACCAATGGAACCTCCAAGATCAAGATGAAATGGGGCATGGAATGAGGGCGT  
GCCTTCTTCAGTCTTTCAGCAGATTGAGAGCATGATTGAGGCCGAGTCTTCTGTCAAAGAGAAGACAT  
GACCAAGGAATCTTTGAAAACAATCGGAAATCGGCAATCGGAGAGTCAACAGGGGAGTGGAGGAA  
GGCTCTATTGGGAAAGTGTGACGACCTTACTGGCAAATCTGTATTCAACAGTCTATATGCGTCTCCAC  
AACTTGAGGGGTTTTCCGCTGAATCTAGAAAATGCTTCTCATTGTTCAAGGCACTTAGGGACAACCTGGA  
ACCTGGAACTTCGATCTGGGGGGCTATATGAAGCAATCGAGGAGTGCCTGATTAATGATCCCTGGGTT  
TTGCTTAATGCATCTGGTTCACTCCTTCTCACACATGCACTGAAGTAG

>MF575147.1 Influenza A virus (A/black-headed gull/Netherlands/31/2014(H13N6)) segment 3 polymerase PA (PA) and PA-X protein (PA-X) genes, complete cds

AGCAAAGCAGGTACTGATCCAAAATGGAAGACTTTGTGCGACAATGCTTCAATCCAATGATTGTCGAGC  
TTGCGGAAAAGGCAATGAAAGAATATGGGAAGATCCGAAAATCGAAACAAACAAATTTGCCGCAATATG  
CACACACTTAGAAGTCTGTTTCATGATTCGATTTCCACTTTATTGATGAACGGGGCGAATCAATAATT  
GTAGAATCTGGCGACCCGAATGCATTATTGAAACACCCGATTTGAGATAATTGAAGGAAGAGACCGAACAA  
TGGCCTGGACAGTGGTTAATAGTATGCAACACCACAGGAGTCGATAAGCCTAAATTCCTCCAGATTT  
ATATGACTACAAAGAGAACCAGTTCATTGAAATTTGGAGTGACACGAAGGGAAGTCCACATATACTATCTA  
GAAAAAGCCAACAAGATAAAATCAGAGAAGACACACATTACATATTCTCATTCACTGGAGAGGAAATGG  
CCACCAAAGCGGACTACACCCTTGATGAAGAGAGCAGAGCAAGAATAAAAACCAGTTGTTCACTATAAG  
ACAAGAAATGGCCAGTAGGGGTCTATGGGATTCCTTTGTCAGTCCGAGAGAGGGCAAGAGACAATTGAA  
GAAAGATTTGAAATCACAGGAACCATGCGCAGGCTTCCGACCAAAGTCTCCACCGAACTTCTCCAGCC  
TTGAAAACCTTAGAGCCTATGTGGATGGATTGCAACCGAACGGCTGCATTGAGGGCAAGCTTTCTCAAAT  
GTCAAAGAAGTGAACGCCAGAATTGAGCCATTTCTGAAAACAACACCACGCCCTCTCAGGTTACCTGAT  
GGGCCTCCCTGCGCTCAGCGGTCAAAGTCTTGTGCTGATGGATGCCCTTAAATTAAGCATCGAAGACCCGA  
GTCTAGAGGGGGAAGTATACCGCTATATGATGCAATCAAATGCATGAAGACATTCTTCGCTGGAAGA  
GCCCAACATCGTAAACCACATGAAAAGGGCATAAACCCCAACTACCTCTGGCTTGGAAAGCAGGTGCTA  
GCAGAACTCCAAGATATTGAAAACGAGGAGAAAATCCAAAAACAAGAACATGAAGAAGACAAGCCAAT  
TGAAGTGGGCACTTGGTGAGAACATGGCACCAAGAGAAAAGTGGACTTTGAGGACTGCAAAGATGTTAGTGA  
TCTAAAACAGTATAACAGTGAAGAACCAGAGTCTAGATCGCTAGCAAGCTGGATCCAGAGTGAATTAAC  
AAGGCATGCGAATTGACAGATTCAAGTTGGATCGAACTTGACGAAATAGGGGAAGACGTTGCTCCAATTG

AGCACATTGCGAGTATGAGGAGAACTATTTACAGCGGAAGTATCCCATTGCAGGGCTACTGAATACAT  
AATGAAGGGAGTGATATAAACACAGCCCTGTTGAATGCATCCTGCGCAGCCATGGATGACTTCCAATTG  
ATTCCAATGATAAGCAAGTGCAGAACCAAAGGAAGGCGGAAACAAATCTGTATGGATTCAATTGTAA  
AAGGCAGATCCCATTGAGAAAACGACCCGATGTGGTTAACTTTGTGAGCATGGAGTTCTCTCACTGA  
CCCCGAGGCTGGAGCCACACAAATGGGAAAAGTACTGTGTTCTTGAGATAGGGGACATGCTCCTACGGACT  
GCAATAGGCCAAGTGTCAAGGCCATGTTCTGTACGTAAGAACCAACGGGACTTCCAAGATCAAAATGA  
AATGGGGCATGGAATGAGGCGATGCCTTCTCAGTCCCTTCAACAAATTGAGAGCATGATTGAGGCAGA  
GTCTTCTGTCAAAGAGAAGGACATGACCAAGGAATCTTTGAAAACAAATCAGAAACATGGCCAATTGGA  
GAATCGCCAAAGGGTGGAGGAGGGCTCCATTGGGAAGGTTTGCAGAACATTACTAGCAAAATCTGTGT  
TCAACAGCCTGTATGCATCTCCACAACCTCGAAGGGTTTTAGCTGAATCGAGAAAAGTTGCTTCTATTGT  
TCAGGCACTTAGGGACACCTGGAACCTTCGATCTTGGGGGGCTATATGAAGCAATTGAGGAG  
TGCCTGATTAATGATCCCTGGGTTTTGCTTAATGCGTCTGGTTCAACTCCTTCTCACACATGCACTGA  
AATAGTTGTGGCAATGCTACTATTGCTATCCATACTGTCCAAAAAAGTACTTGTCTTCTACT  
>iavh1n11922|A/Mute\_Swan/Netherlands/2/2022|EPI\_ISL\_15364797|A/Mute\_Swan/Netherlands/2/2022|PA|3||A/Mute\_Swan/Netherlands/2/2022  
TACTGATCCAAAATGGAAGACTTTGTGCGACAATGCTTCAATCCAATGATTGTGCGAGCTTGGCGAAAAGG  
CAATGAAAGAATATGGGGAAGATCCGAAAATCGAATCAACAAATTTGCCGCAATATGCACACACCTAGA  
AGTCTGCTTCATGTATTCGGATTTCCTTTATTGATGAACGAGGAGAATCAATAATTGTAGAATCTGGC  
GATCCGAATGCATTATTGAAACCCGATTCGAGATAATGAAGGGAGAGACCGAACCATGGCCTGGACAG  
TGGTGAATAGCATCTGCAACACCACAGGAGTCGAAAAGCCAAATTCCTCCCTGATTGTATGACTACAA  
AGAGAACCATTGAAATGGAGTAACGCGAAGGGAAGTTACATATACTATCTAGAGAAAAGCCAAC  
AAGATAAAATCAGAGAAAGACACACATTCATATATTCTCACTGAGAGGAAAATGGCCACCAAGGGCG  
ACTACACCTTGATGAAGAGAGTAGAGCAAGAATAAAAACAGGCTATCACTATAAGACAAGAAATGGC  
CAGTAGGGGTCTATGGGATTCCTTTGCTCAGTCCGAGAGAGGCGAAGAGACAATTGAAGAAAAGATTGAA  
ATCAGAGGAACCATGCGCAGGCTTGCCAAACAAAGTCTCCACCGAACTTCTCCAGCCTTGAAAACCTTA  
GAGCCTATGTGGATGGATTGCAACCCGACGGCTGCATTGAGGGCAAGCTTCTCAAATGTCAAAAAGAAAT  
GAATGCCAGAATTGAGCCATTTCTGAAGAAAACACCACGCCCTCTCAGATTACCTGATGGGCCTCCCTGT  
TCTCAGCGATCGAAGTTCTTGCTGATGGATGCCCTCAAATGAGCATCGAAGACCCGAGCCATGAGGGGG  
AGGGTATACCGTGTATGATGCAATCAAATGCATGAAGACATTTTTGGCTGGAAGAGCCTAACATCGT  
AAAACCGCATGAAAAGGGCATAAACCTAATTACCTTCTGGCTTGAAAACAGGTGCTGGCAGAACTCCAA  
TATATTGAAAATGAGGAGAAAATCCCAAAAACAAAGAACATGAAGAAAACAAGCCAATTGAAGTGGGCAC  
TTGGTGAGAACATGGCACCAGAGAAGGTGGACTTTGAGGACTGTAAAGATGTTAGTGATCTAAGACAGTA  
CGACAGTGACGAACCAAGTCTAAATCACTAGCAAGCTGGATCCAGAGTGAATCAACAAGGCATGCGAA  
TTGACAGATTCAAGTTGGATTGAACCTTGATGAAATAGGGGAAGACATTGCTCCAATTGAACACATTGCGA  
GTATGAGGAGAACTATTTACAGCGGAGGTGCCATTGCAGGGCTACTGAATACATAATGAAGGGAGT  
ATACATAAACACAGCCCTGTTGAATGCATCCTGTGCAGCGATGGATGACTTCAACTGATTCTCTATGATA  
AGCAAGTGCAGAACCAAAGGAAGGACGGAAGACAAATTTATATGGATTCAATATAAAAAGGAAGATCCC  
ATTTGAGGAATGACCCGATGTGGTGAACCTTTGTGAGCATGGAATCTCTCACTGACCCGAGGCTGGA  
GCCACACAAATGGGAAAAGTACTGTGTTCTTGAGATAGGAGACATGCTCCTACGGACTGCAATAGGCCAA  
GTGTCAAGGCCATGTTCTGTATGTGAGAACCAATGGAACCTTCAAGATCAAAATGAAATGGGGCATGG  
AGATGAGACGATGCCTTCTCAGTCCCTTCAACAAATTGAGAGCATGATTGAGGCCGAGTCTTCTGTCAA  
AGAGAAGGACATGACCAAGGAATCTTTGAAAACAAATCAGAAACATGGCCAATTGGGGAAATCACCCAAA  
GGGGTGGAAAGAGGGCTCCATTGGGAAGGTATGCGAAGCATTGCTAGCAAAGTCTGTGTTCAACAGCCTAT  
ATGCATCTCCACAACCTGAGGGTTTTAGCTGAATCAAGAAAATGCTTCTCATTGTTCAAGCCTTAG  
GGACAACCTGGAACTGGAACCTTCGATCTTGGGGGGCTATATGAAGCAATTGAGGAGTGCCTGATTAAC  
GATCCCTGGGTTTTGCTTAATGCGTCTGGTTCAACTCCTTCTCACACATGCACTGAAATAGTTGTGGC  
AATGCTACTATTGCTATCCATACTGTCCAAAAAAGTA

>iavh1n11922|A/Barry/3792/2022|EPI\_ISL\_15391170|A/Barry/3792/2022|PA|3||A/Barry/3792/2022

CAGCAAAGCAGGTACTGATTCAAATGGAAGATTTTGTGCGACAATGCTTCAACCCGAAGCAATGAAAAG  
AGTATGGGGAGGATCTGAAAATTGAAACCAACAATTTGAGCAATATGCACTCACTTGGAGGTGTGTTT  
CAGATTTCCATTTTCATCAATGAACAAGGCGAATCAATAGTAGTAGAACTTGACGATCCAAATGCACTGTT  
AAAACACAGATTTGAAAATATCGAGGGGAGAGACAGAACAAATGCCTGGACAGTAGTAAACAGTATCTCG  
AACACTACTGGAGCTGAAAAACCGAAGTTTTACCAGGATTTGATGATTACAAAGAAAAACAGATTCATCG  
AAATTGGAGTGACAAGGAGAGAAGTCCACATATATTACCTTGAAAAGGCCAATAAGATTAATCTGAGAA  
AACACACATTACATTTTTTTCATCACTGGGAGGAAATGGCCACAAGGGCAGACTACACTCTCGATGAG  
GAGAGCAGGGCTAGGATCAAAACCGAGCTGTTACCATAAGACAAGAAATGGCCAACAGAGGCCTCTGGG  
ATTCTTTTCGTGAGTCCGAAAAGAGGCGAAGAAACAATTGAAGAAAAATTTGAAATCACAGGGACTATGCG  
CAGGCTTGCCGACCAAAGTCTCCACCGAACTTCTCCTGCTGAGAATTTAGAGCCTATGAGGATGGA  
TTCGAACCGAACGGCTGCATTGAGGGCAAGCTTCTCAAATGTCCAAAGAAGTGAATGCCCAAATGAAAC  
CTTTTCTGAAGACAACCAAGACCGATCAAACCTCCTAGTGGACCTCCTGTTATCAGCGATCCAAAT  
CCTCCTGATGGATGCTTTGAAATTGAGCATTGAAGACCCAAGTACGAAGGAGAAGGGATCCCATTATAT  
GATGCAATCAAGTGCATGAAAACATTTTGGATGAAAAGAACCTTGATAGTCAAACACACGAAAAGG  
GAATAAATTCAAATTACCTGCTGTCATGGAAGCAAGTACTGTGAGAATTGCAGGACATTGAAAATGAGGA  
GAAGATTCCAAGAAATAAAAACATGAAGAAAACGAGTCAACTGAAGTGGGCTCTTGGTGAACATGGCA  
CCAGAGAAGGTAGACTTTGAAAACCTGCAGAGACATAAGCGATTTGAAGCAATATGATAGTGAAGAACCTG  
AATTAAGGTCACTTTCAAGCTGATACAGAGTGAGTTCAACAAGGCTGTGAGCTAACTGATTCAGTCTG  
GATAGAACTCGATGAAATTGGAGAGGACGTAGCCCCAATTGAACACATTGCAAGCATGAGAAGGAATTAT  
TTCACAGCAGAGGTGTCCTTGTAGAGCTACTGAATACATAATGAAGGGGTATACATTAATACTGCC  
TGCTCAATGCATCCTGTGAGCAATGGACGATTTTCAACTAATCCCATGATAAGCAAGTGCAGAACTAA  
AGAGGGAAGGCGAAAAACCAATTTATATGGATTTCATCATAAAGGGAAGATCTCATCTGAGGAATGACACA  
GATGTGGTAAACTTTGTGAGCATTGGAGTTTTCTCTCACAGATCCTAGACTTGAACACATAAATGGGAGA  
AATATTGTGCTTGAGATAGGAGATGTTACTAAGGAGTGCATAGGCCAAATTTCAAGGCCAATGTT  
CTTGTATGTGAGGACAAACGGAACATCAAAGTCAAATGAAATGGGGAATGGAGATGAGACGTTGCCCTC  
CTTCAGTCACTCCAGCAGATCGAGAGCATGATTGAAGCCGAGTCTCAGTTAAAGAGAGAGACATGACCA  
AAGAGTTTTTGAAGATAAATCAGAAGCATGGCCATTGGGGAAATCCCCAAAGGAGTGAAGAAGGTTCT  
CATTGGGAAAGTCTGTAGGACTCTATTGGCTAAGTCAAGTATTCAATAGCCTATATGCATACCACAATTG  
GAAGGATTTTCAGCAGAGTCAAGAAAACCTGCTCCTTATTGTTAGGCTCTTAGGGACAAACTCGAACCTG  
GGACTTTTGATCTTGGGGGGCTATATGAAGCAATTGAGGAGTGCCTGATTAATGATCCCTGGGTTTTGCT  
CAATGCGTCTTGGTTCAACTCCTCCTGACACATGCACTAAAATAGTTATAGCAGTGTACTACTATTGTTA  
TCCGTAAGTGTCCAAAAAAGTACCTGTTTTCTACT

>BYM28112022\_H3N2\_PA\_3

CAGCAAGAGCAGGTACTGATTCAAATGGAAGATTTTGTGCGACAATGCTTCAACCCGAAGCAATGAAAAG  
AGTATGGGGAGGATCTGAAAATTGAAACCAACAATTTGAGCAATATGCACTCACTTGGAGGTGTGTTT  
CAGATTTCCATTTTCATCAATGAACAAGGCGAATCAATAGTAGTAGAACTTGACGATCCAAATGCACTGTT  
AAAACACAGATTTGAAAATATCGAGGGGAGAGACAGAACAAATGCCTGGACAGTAGTAAACAGTATCTCG  
AACTTTACTGGAGCTGAAAAACCGAAGTTTTACCAGGATTTGATGATTACAAAGAAAAACAGATTCATCG  
AAATTGGAGTGAAGGAGAGAAGTCCACATATATTACCTTGAAAAGGCCAATAAGATTAATCTGAGAA  
AACACACATTACATTTTTCATCACTGGGAGGAAATGGCCACAAGCCGAACACTACACTCTCGATGAG  
GAGAGCAGGGCTAGGATCAAAACCGACTGTTACCATAAGACAAGAAATGGCCAACAGAGGCCTCTGAG  
ATTCTTTTCGTGAGTCCGAAAAGAGGCGAAGAAACAATTGAAGAAAAATTTGAAATCACAGGGACTATGCG  
CAGGCTTGCCAAACCAAAGTCTCCACCGAACTTCTCCTGCTGAGAATTTAGAGCCTATGAGGATGGA  
TTCGAACCGAACGGCTGCATTGAGGGCAAGCTTCTCAAATGTCCAAAGAAGTGAATGCCCAAATGAAAC  
CTTTTCTGTTGACAACCAAGACCGATAAAACTTACTCGTGGACATCATATTATCAGCGATCCAAAT

CCTCCTAATGGATGCTTTGAAATTGAGCATTGAAGACCCAAGTCACGAAGGAGAAGGGATCCCATTATAT  
GATGCAATCAAGTGCATGAAAACATTCTTTGGATGGAAGAACCTTGATAGTCAAACCACACGAAAAGG  
GAATAAATCAAATTATCTGCTGTGCATGGAAGGAAACTGTGTCAGAATTGCAGGACATTGAAAATGAAGA  
GAAGATTCCAAGAACTAAAAACATGAAGAAAACGAGTCAACTGAAGTGGGCTCTTGGTGAAAACATGGCA  
CCAGAGAAGGTAGACTTTGAAAACACACAGAGACATAAGCGATTGGAAGCAATATGATAGTGAAGAACCAG  
AATTAAGGTCACCTTCAAAGTGGATACAGAGTGAAGTTCACCAAGGCTGTGAGCTAACTGATTCAGTCTG  
GATAGAAGTTCGATGAAATTGGAGAGGACGTAGCCCAATTGAACACATTGCAAGCATGAGAAGAGATTAT  
TTCACAGCAGAGGTGTCCCATGAAAGAGCTACTGAATACATAATGAAAGGGGTATACATTAATACTGCC  
TGCTCAATGCATCCTGTGACGAATGGACGATTTTCGACTAATCCCATGATAAGCAAGTGCAGAATAA  
AGAGGGAAGGCGAAAACCAATTATATGGATTTCATATAAAGGGAAGATCCCATCTGAGGAATGACACA  
GATGTGGTAACTTTGTGAGCATGGAGTTTTCTCTCACAGATCCGAGACTTGAACCACATAAATGGGAGA  
AATATTGTGTTCTTGAGATAGGAGATATGTTACTAAGGAGTGCATAGGCCAAATTTCAAGGCCAATGTT  
CTTGATATGTGAGGACAAACGAAACATCAAAGTCAAATGAAATGGGAATGGAGATGAGACGTTGCCCTC  
CTTCAGTCACTCCAGCAGATCGAGAGCATGATTGAAGCCGAGTCTCAGTTAAAGAGAGAGACATGACCA  
AAGAGTTTTTGAAGAATAATCAGAAGCATGGCCATTGGGGAATCCCCAAAGGAGTGAAGAAGGTTT  
CATTGGGAAAAGTCTGTAGACTCTATTGGCTAAGTCAAGTATCAATAGCCTATATGCATCACCAACAATTG  
GAAGGATTTTCAAGCAGAGTCAAGAAAAGTCTCCTATTGTTCAAGGCTTATAGGACAAAACGAACTG  
GGACTTTTATCTGGGGGCTATATGAAGCAATTGAGGAGTGCCTGATTAAATGATCCCTGGGTTTGTCT  
CAATGCGTCTTGTTCAACTCCTTCTGACACATGCACTAAAATAGTTATAGCAGTGCTACTATTTGTTA  
TCCGCTAGTCCAAAAAAGTACCTTGTCTACT

>NC\_026433.1 Influenza A virus (A/California/07/2009(H1N1)) segment 4 hemagglutinin (HA) gene, complete cds

ATGAAGGCAATACTAGTAGTTTCTGCTATATACATTTGCAACCGCAAATGCAGACACATTATGATAGGTT  
ATCATGCGAACAATTCAACAGACACTGTAGACACAGTACTAGAAAAGAATGTAACAGTAACACACTCTGT  
TAACCTTTCTAGAAGACAAGCATAACGGGAAACTATGCAAACTAAGAGGGGTAGCCCATTCGATTTGGGT  
AAATGTAACATTGCTGGCTGGATCCTGGGAAATCCAGAGTGTGAATCACTCTCCACAGCAAGCTCATGGT  
CCTACATTGTGAAACACCTAGTTCAGACAAATGGAACGTGTTACCCAGGAGATTTCATCGATTATGAGGA  
GCTAAGAGAGCAATTGAGCTCAGTGTCACTATTGAAAAGTTTGAAGATATCCCAAGACAAGTTTCATGG  
CCCAATCATGACTCGAACAAAGGTGTAACGGCAGCATGCTCATGCTGGAGCAAAAAGCTTCTACAAAA  
ATTTAATATGGCTAGTTAAAAAAGGAAATTCATACCAAGCTCAGCAAATCCTACATTAATGATAAAGG  
GAAAGAAGTCTCGTGCTATGGGGCATTACCATCCATCTACTAGTGTGACCAACAAAGTCTCTATCAG  
AATGCAGATGCATATGTTTTGTGGGGTCATCAAGATACAGCAAGAAGTTCAAGCCGAAATAGCAATAA  
GACCCAAAGTGAGGGRTCRAGAAGGGAGAATGAACTATTACTGGACACTAGTAGAGCCGGGAGACAAAAT  
AACATTCGAAGCAACTGGAAATCTAGTGTACCGAGATATGCATTGCAATGAAAAGAAATGCTGGATCT  
GGTATTATCATTTAGATACACACAGTCCACGATTGCAATCAACTGTCAAACACCAAGGGTGTATAA  
ACACCAAGCCTCCATTTCAAGATATACATCCGATCACAATTGGAAAATGTCCAAAATATGTA AAAAGCAC  
AAAATTGAGACTGGCCACAGGATTGAGGAATATCCCGTCTATTCAATCTAGAGGCCTATTTGGGGCCATT  
GCCGTTTCATTGAAGGGGGTGGACAGGGATGGTAGATGGATGGTACGGTTATCACCATCAAATGAGC  
AGGGGTACGGATATGCAGCCGACCTGAAGAGCACACAGAATGCCATTGACGAGATTACTAACAAAAGTAAA  
TTCTGTTATTGAAAAGATGAATACACAGTTCACAGCAGTAGGTAAGAGTTCAACCACCTGGAAAAAAGA  
ATAGAGAATTTAAATAAAAAAGTTGATGATGGTTTCTCTGGACATTGGACTTACAATGCCGAACTGTTGG  
TTCTATTGAAAATGAAAAGAACTTTGACTACCACGATTCAAATGTGAAGAACTTATATGAAAAGGTAAG  
AAGCCAGCTAAAAACAATGCCAAGGAAATGGAAACGGCTGCTTTGAATTTTACCACAAATGCGATAAC  
ACGTGCATGAAAAGTGTCAAATGGGACTTATGACTACCCAAAATACTCAGAGGAAGCAAAAATTAACA  
GAGAAGAAATAGATGGGGTAAAGCTGGAATCAACAAGGATTACCAAGATTTTGGCGATCTATTCAACTGT  
CGCCAGTTCATTGGTACTGGTAGTCTCCCTGGGGCAATCAGTTTCTGGATGTGCTCTAATGGGTCTCTA  
CAGTGTAGAATATGATTTAA >MF575089.1 Influenza A virus (A/black-headed gull/Netherlands/31/2014(H13N6)) segment 4 hemagglutinin (HA) gene, complete cds

AGCAAAAGCAGGGGAGAATTCAACAAACCGAAACGAGAGAAATGGAAGTCCCAGTATTCGCACTCTTAGT  
GTTAACCCAGCATATGCGTACAAGCTGATAGGATTTGTGTTGGGTACTTAAGCACAAACTCATCAGAAAGG  
GTTGACACACTGCTAGAGAATAATGTCCCGGTTACAAGCTCTGTTGATTTGGTTGAGACTAACCCACAG  
GAACATATGTTCTTTGGGTGGAATAGTCCAGTGCACTGGGAGACTGTAGCTTCGAGGGCTGGATTCT  
AGGGAAACCCTGCCTGTGCCAGCAACCTGGGGATTAGAGAATGGTCATATTTGATTGAGGACCCCTTGCT  
CCTCATGGATTGTGCTATCCAGGAGAGTTAGACAACAATGGAGAATTGAGGCCTGTTTAGTGGAATCA  
GATCTTTCAGTAGAACGGAATTGTTGCACCTACCTCTGGGGGGCAGTGAATGATGGAGTAACGGCTGC  
CTGTCAAGACAGAGGAGCTAGCAGCTTTTACCGGAACCTGGTATGGTTTGTGAAGAGAGGGAATAACTAT  
CCTGTGATCCGCGGGACCTACAACAACCACTGGCAGAGATGTCTTGGTTATATGGGGTATACATCACC  
CTGTCTCCACAGCCGAAGCGAGGGAACCTGTATGCAAAAGACGATCCTTACACATTGGCATCTACCAGTTC  
ATGGAGCAAGAAGTACAACCTAGAAAAGTGAACCCGACCTGGATACAATGGCCAAAAGAGTTGGATGAAG  
ATTTACTGGTATCTGATGCACCCCGGGGATTCAATCAGTTTCGAAAGCAGTGGGGGACTACTGGCTCCA  
GATATGTTTACATATTAGGGAATATGAAAAAGGGCAATTTTCCAAGCCGATTTCGATTGCTAAATG  
CAACTAAATGCCAGACATCGGTTGGTGGAAATAAATACTAACAAAACATTTCAAAACATAGAGAGAAAT  
GCACTTGGAGATTGCCGAATACATAAAATCTGGACAGCTCAAATTGGCCACTGGACTTAGGAATGTAC  
CTGCCATATCAACACAGAGGATTGTTTGGGGCTATTGCAGGCTTCATAGAAGGTGGTTGGCCAGGATTAAT  
AAATGGTTGGTATGGAATCCAACATCAGAATGAACAAGGAACGGGCATAGCTGCAGACAAAAGAAATCAACA  
CAAAAGGCTATTGATCAAATAACAATAAGATAAAACAATATAATAGAAAAAATGAATGGGAACATGACT  
CAATACGAGGTGAATTCAGTCAGGTGGAACAAGAATAAATATGCTTCAGACAGAATAGATGATGCTGT  
AACTGACATATGGTCATACAATGCAAAAGCTTCTTGTCTTGCTAGAAAACGACAAGACTCTAGACATGCAC  
GACGTAATGTCAAGAACTGCATGATCAAGTCCGAGAGTGCTGAGGACCAATGCAATTGATGAGGGGA  
ATGGATGTTTTGAACCTCCTCATAAATGTAATGACTCTTGCATGGAGACAATAAGAAATGGAACGTACAA  
TCATATAGATGTAAGAGGAATCAAAGTAAAAAGGCAGGAAATAGAAGGTATAAAGCTGAAGTCAGAC  
GACAATGTCTACAAAGCATTGTCAATTTACAGCTGCATTGCAAGCAGTATTGTATTGGTAGGACTCATA  
TTGCATTATCATGTGGGCATGCAGCAGTGGCAGTTGCCGATTCAATATTGTATATAAGCAGAAAAAAC  
ACCTTGTCTACT

>iavh1n11922|A/Mute\_Swan/Netherlands/2/2022|EPI\_ISL\_15364797|A/Mute\_Swan/Netherlands/2/2022|HA|4||A/Mute\_Swan/Netherlands/2/2022

GTTCACTCTGTCAAATGGAGAGCATAGTACTTCTTCTTGAATAGTTAGCCTTGTAAAAGTGATCAGA  
TTTGCATTGGTTACCATGCAAATAATTCGACAGAGCAGGTTGACACGATAATGAAAAAGAACGTCCTGT  
TACACATGCCAAGACATATTGGAAAAACACACAACGGGAAGCTCTGTGATTTAAATGGGGTGAAGCCT  
CTGATTTTAAAGGATTGTAGTGTAGCTGGATGGCTCCTCGGAAACCAATGTGCGACGAATTCATCAGAG  
TGCCGGAATGGTCTACATAGTGGAGCGGGCTAATCCAGCTAATGACCTCTGTTACCCAGGGAGCCTCAA  
TGACTATGAAGAACTGAAACACCTGTTGAGCAGAATAAATCATTGTGAGAAGATTCTTATCATCCCAAG  
AGTTCTGGCCAAATCATGAAACATCACTAGGGGTGAGCGCAGCTTGTCCATACCAGGGGGCGCCCTCCT  
TTTTCAGAAATGTGGTGTGGCTTATCAAAAGAACGATGCATACCAACAATAAAGATAAGCTACAATAA  
TACCAATCGGGAAGATCTCTGATACTGTGGGGGATTTCATCATTCCAACAATGCAGAAGAACAGACAAAT  
CTCTATAAAACCAACACCTACATTTCAAGTTGGAACATCAACTTTAAACCAGAGGTTGGTACCAAAAA  
TAGCTACTAGATCCCAAGTAAACGGGCAACGTGGAAGAATGGACTTCTTCTGACAAATTTAAAAACGAGA  
TGATGCAATCCATTTGAGAGTAATGGAATTTCAATGCTCCAGAATATGCATATAAAATGTCAAGAAA  
GGGACTCAACAATATGAAAAGTGGAGTGGAAATATGGCCACTGCAACACCAATGTCAAACCCAGTAG  
GAGCGATAAATCTAGTATGCCATTCACAACATACATCCTCTACCATTGGGGAATGCCCAATACGT  
GAAGTCAAACAAGTTGGTCTTTCGACTGGGCTCAGAAATAGTCTCTAAGAGAAAAGAGAAGAAAAAGA  
GGCCTGTTGGGGCGATAGCAGGTTTATAGAGGGAGGATGGCAGGGAATGGTTGATGTTGGTATGGGT  
ACCATCATAGCAATGAGCAGGGGAGTGGGTACGCTGCAGACAAAGAATCCACCCAAAAGGCAATAGATGG  
AGTTACCAATAAGGTCAACTCAATCATTGACAAAATGAACACTCAATTTGAGGCAGTTGGAAGGGAGTTT  
AATAACTTAGAAAGGAGATAGAGAATCTGAACAAGAAAATGGAAGACGGATTCTAGATGTCTGGACCT

ATAATGCTGAACCTTAGTTCTCATGGAAAACGAGAGGACTCTAGATTTCCATGATTCAAATGTCAAGAA  
CCTTTACGACAAAAGTAAGACTACAGCTTAGGGATAATGCAAAGGAGCTTGGTAATGGCTGTTTCGAATTC  
TATCACAATGCGATAATGAATGTATGGAAAGTGTGAGAAATGGGACGTATGACTACCCTCAGTATTCAG  
AAGAAGCAAGATTA AAAAGAGA AAAATAAGCGGAGTGA AATTAGAATCAATAGGAACCTACCAGATACT  
GTCAATTTATTCAACAGCGGGCGAGTTCCCTAGCACTGGCAATCATGATAGCTGGTCTATCTTTATGGATG  
TGCTCCAATGGGTCGTTACAGTGCAGAAATTCGATTTAGATTTGTGAGCTCAGATTGTAGTTAAAAACAC  
>iavh1n11922|A/Barry/3792/2022|EPI\_ISL\_15391170|A/Barry/3792/2022|HA|4||A/Barry/3792/2022  
AGCAAAGCAGGGGATAATTCTATTAACCATGAAGGCTATCATTGCTTGGAGCAACATTCTATGTCTTGT  
TTTCGCTCAAAAAATACCTGAAATGACAATAGCACGGCAACGCTGTGCCTTGGGCACCATGCAGTACCA  
AACGGAACGATAGTGA AAACAATCACAATGACCGAATTGAAGTTACTAATGCTACTGAGTTGGTTCAGA  
ATTCATCAATAGGTA AAAATATGCAACAGTCCCTCATCAGATCCTTGATGGAGGGAACTGCACACTAATAGA  
TGCTCTATTGGGGACCCTCAGTGTGACGGCTTTCAAATAAGGAATGGGACCTTTTTGTTGAACGAAGC  
AGAGCCAACAGCAGCTGTACCCCTTATGATGTGCCGGATTATGCCTCCCTTAGTCTACTAGTTGCCTCAT  
CCGGAACACTGGAGTTTAAAAATGAAAGCTTCAATTGGACCGGAGTCAAACAAAACGGAACAAGTTCTGC  
GTGCAAAAGGGGATCTAGTAGTAGTTTTTTAGTAGATTA AATTGGTTGACCAGCTTAAACAACATATAT  
CCAGCACAGAACGTGACTATTGCCAAACAAGGAACAATTTGACAAATGTACATTTGGGGGGTTCAACCAC  
CGGATACGGACAAGAACCAATTCTCCCTGTTTGCTCAATCATCAGGAAGAATCACAGTATCTACAAAAG  
AAGCCAACAAGCTGTAATCCCAATATCGGATCTAGACCCAGAGTAAGGGATATCCCTAGCAGAATAAGC  
ATCTATTGGACAATAGTAAAACCGGGAGACATACTTTGATTAAACAGCACAGGGAATCTAATTGCTCCTA  
GGGGTTACTTCAAATACGAAGTGGGAAAAGCTCAATAATGAGATCAGACGCACCCATTGGCAAATGTAA  
GTCTGAATGCATCACTCCA AATGGAAGCATTCCAATGACAAAACCGTTCCA AATGTAAACAGGATCACA  
TACGGGGCCTGTCCAGATACGTTAAGCAAAGCACCTTGAAATGGCAACAGGAATGCGAAATGTACCTG  
AGAAACAAACCAGAGGCATATTTGGTGAATAGCGGGTTTCATAGAAAATGGATGGGAGGGAAATGGTGGA  
TGGTTGGTACGGTTTCAGGCATCAA AATTCTGAGGGAAGAGGACAAGCAGCAGATCTCAAAGCACTCAA  
GCAGCAATCGATCAAATCAGTGGGAAGCTGAATCGATTGATCGGAAAAACCAACGAGAAATCCATCAGA  
TTGAAAAAGAAATCTCAGAAGTAGAAGGAAGAGTTCAAGACCTCGAGAAATATGTTGAGGACACTAAAAT  
AGATCTCTGGTCATACAACGCGGAGCTTCTTGTGGCCCTGGAGAACCAACATACGATTGACCTAACTGAC  
TCAGAAATGAACAAGCTGTTTGA AAAAAACAAGAAGCAACTGAGGGAAAATGCTGAGGATATGGGAAATG  
GTTGTTTCAAATATACCACAATGTGACAATGCCTGCATAGGATCAATAAGAAATGAAACTTATGACCA  
CAATGTGTACAGGGATGAAGCATTAAACAACCGGTTCCAGATCAAGGGAGTTGAGCTGAAGTCAGGGTAC  
AAAGATTGGATCCTATGATTTCTTTGCCATGTCATGTTTTTTGCTTTGTTATGCTTTGTTGGGGTTCA  
TCATGTGGGCTGCCAAAAGGGCAACATTAGATGCAACATTTGCATTTGAGTGCATTAATAAAAACACC  
CTTGTTTCTACT

>NDN12092022\_H13N6\_HA\_4

AGCAAAGCAGGGGAGGATTACCAAACCAATACGAGAGAAATGGAAGTCCCGGTATTGCACTCCTAGT  
GTTAACCAGCATATGCGTACAAGCCGATAGGATTTGAGCTGGGTACTCAAGCACAAACTCATCAGAAAGG  
GTTTATACACTGTTAGAAAATAATGTC CCGGTTACAAGCTCTGTTGATTTGGTTGAGACTAACCACACAG  
GAACATATTGTTCTTTGGGTGGAATTAGTCCAGTGC ACTTGGGGGACAGTAGCTTTG AAGGCTGGATTCT  
AGGGAACCCCTGCCTGTGACAGTAACTGGGGTTAGAGAATGGTCATATTTGATTGAAGACCCCTTGTGCT  
CCTCATGGATTGTGCTACCCAGGAGAGTTAGACAACAATGGAGAATTGAGACATTTGTTTAGTGGGATCA  
AATCTTTCAGTAGGACAGAATTGATCGACCTCCCTCTCTGGGGGAAGTGAATGATGGAGTAACAGCTGC  
CTGTGAAGACAAAAGAGCTAGCAGCTTTTACCGAAACTTAGTATGGTTGTGAAGAGAGGGAGTAACTAC  
CCTGTAATCCGCTGGACCTACAACAACACCACTGGCAGAGATGCTTGGTTATATGGGGTATTTCATCACC  
CTGTCTCCACAACCGAAAACGAGGGACCTGTATGCAAAGACAACCCATACACATTGGTATCTACCAGTTC  
ATGGAGCAAGAAGTACAGCCTAGA AACTGGAACCCGACCTGGATACAATGGCCAAAAGAGTTGGATGAAG  
ATTTACTGGCATCTGATGCACCCGGGGAGTCAATCAGTTTCGAAAGCAATGGGGGATTGCTGGCTCCAA



AATATGGTTACATTGTTGAGGAATATGGCAAAGGGCGAATTTTCAAAGCCGTATTCGCATTGCTAAATG  
TAACACTAAATGCCAGACATCGGTTGGTGGAAATAACTAACAACAAATTTCAAACATAGAAAAGAAAT  
GCACTCGGAGATTGCCCGAAATACATAAAATCTGGACAGCTCAAATTTGGTCACTGGACTTAGGAATGTAC  
CTGCCATATCAAACAGAGGATTGTTGGGGCTATTGCAGGCTTCATAGAAGTGGTTGGCCAGGATTAAT  
AAATGGATGGTATGGATTCCAACATCAGAATGAACAGGGAACGGGCATAGCTGCAGACAAAAGAATCAACA  
CAAAAGGCTATTGACCAATAACAATAAAATAAACAATATAATAGAAAAATGAATGGGAACTATGACT  
CAATACGAGGGGAATTCAGTCAAGTGGGGAAGAGATAAATATGCTGGCAGACAGAATAGATGATGCTGT  
AACTGACATATGGTCATACAATGCGAAGCTTCTTGCTTTAGAAAAACGATAAGACTCTAGACATGCAC  
GACGCTAATGTCAGGAACCTGCATGATCAGGTCCGAGAGTGTGAGGGCCAACGCAATCGATGAGGGGA  
ATGGGTGTTTTGAACTCCTCCATAAATGTAATGATTCTTGCATGGAGACAATAAGAAATGGAACGTACAA  
CCATATAGAGTATGAAGAGGAATCAAAGTAAAAAGGCAGGAAATAGAAGGTATAAAGCTGAAGTCAGAC  
GACGATGCTGCAAAGCATTGTCAATTTACAGCTGCATTGCAAGCAGTATTGTATTGGTAGGACTCATA  
TTGCATTATCATATGTTGGCATGCAGCAGTGGCAATTGCCGATTCAATATTTGTATATAGGCAGAAAAAC  
ACCCTTGTTTCTACT

>NC\_026436.1 Influenza A virus (A/California/07/2009(H1N1)) segment 5 nucleocapsid protein (NP) gene, complete cds

ATGGCGTCTCAAGGCACCAACGATCATATGAACAAATGGAGACTGGTGGGAGCGCCAGGATGCCACAG  
AAATCAGAGCATCTGTCGGAAGAATGATTGGTGGAAATCGGGAGATTCTACATCCAATGTGCACTGAACT  
CAAACCTCAGTGATTATGATGGACGACTAATCCAGAATAGCATAACAATAGAGAGGATGGTCTTTCTGCT  
TTTGATGAGAGAAGAAATAAATACCTAGAAAGAGCATCCAGTGTCTGGGAAAGGACCCTAAGAAAAACAGGAG  
GACCCATATAGAAGAGTAGACGGAAGTGGATGAGAGAACTATCCTTTATGACAAAAGRAGAAATAAG  
GAGAGTTTGGCGCTAGCAAACAATGGCGAAGATGCAACAGCAGGTTCTACTCATATCATGATTGGCAT  
TCCAACCTGAATGATGCCACATATCAGAGAACAAGAGCGTTGTTCCGACCCGGAATGGATCCAGAATGT  
GCTCTCTAATGCAAGTTCAACACTTCCCAGAAGGTCTGGTCCGAGGTGCTGCGGTGAAAGGAGTTGG  
AACAATAGCAATGGAGTTAATCAGAATGATCAAACGTGGAATCAATGACCCGAAATTTCTGGAGGGGTGAA  
AATGGACGAAGGACAAGGGTTGCTTATGAAAGAATGTGCAATATCCTCAAAGGAAAATTTCAAACAGCTG  
CCCAGAGGGCAATGATGGATCAAGTAAGAGAAAGTCAAACCCAGGAAACGCTGAGATTGAAGACCTCAT  
TTTCTGGCACGTCAGCACTATTCTGAGGGGATCAGTTGCACATAAATCCTGCCTGCTGCTTGTGTG  
TATGGGCTTGCAGTAGCAAGTGGGCATGACTTTGAAAGGGAAGGGTACTCACTGGTCGGGATAGCCCAT  
TCAAATTAATCCAAAACAGCCAAGTGGTCAGCCTGATGAGACCAATGAAAACCCAGCTCACAAGAGTCA  
ATTGGTGTGGATGGCATGCCACTCTGCTGCATTGAAGATTAAAGAGTATCAAGTTTCATAAGAGGAAAG  
AAAGTGATTCCAAGAGGAAAGCTTCCACAAGAGGGGTCCAGATTGCTTCAAATGAGAATGTGGAAACCA  
TGGACTCCAATACCCCTGAACTGAGAAGCAGATACTGGGCCATAAGGACCAGGAGTGGAGGAAATACCAA  
TCAACAAAAGGCATCCGACAGGCCAGATCAGTGTGCAGCTACATTCTCAGTGCAGCGGAATCTCCCTTTT  
GAAAGAGCAACCGTTATGGCAGCATTACGCGGGAACAATGAAGGACGGACATCCGACATGCGAACAGAAG  
TTATAAGAATGATGGAAAGTGCAAAGCCAGAAGATTGTCTTCCAGGGGCGGGGAGTCTTCGAGCTCTC  
GGACGAAAAGGCAACGAAACCCGATCGTGCCTTCTTTGACATGAGTAATGAAGGGTCTTATTTCTCGGA  
GACAATGCAGAGGAGTATGACAGTTGA

>MF575100.1 Influenza A virus (A/black-headed gull/Netherlands/31/2014(H13N6)) segment 5 nucleocapsid protein (NP) gene, complete cds

AGCAAAAGCAGGGTAGATAATCACTCACTGAGTGACATCCACATCATGGCGTCTCAAGGCACCAACGAT  
CCTATGAGCAGATGAAACTGGTGTGAACGCCAGAATGCCACTGAGATTCGGGCATCTGTCGGAAGGAT  
GGTTGGAGGAATCGGAAGATTCTACATACAGATGTGCACTGAACTCAAACCTGAGTGACAATGAAGGAAG  
CTGTACAAAACAGTATCAATAGAGAGAATGGTCTGTCTGCATTGATGAGAGGAGGAACAGATACT  
TGGAGGAGCATCCACGCTGGGAGGGACCCAAAGAAAATGGTGGACCAATTTACAGGAGGAGAGAGGG  
GAAATGGGTGAGAGAATTGGTCTTATATGACAAGGAAGAATAAGAGAATCTGGCGACAGGCAAACAAT  
GGAGAAGATTGACTGCTGGCCTCACTCATTGATGATCTGGCATTCTAATTTGAATGACGCCACATATC  
AGAGGACTAGAGCCCTAGTGCACCGGGATGGACCCAGGATGTGCTCCCTCATGCAAGGATCGACACT

CCCAAGAAGGTCTGGAGCGGCTGGTGCAGCTGTAAAAGGAGTTGGGACAATGGTGATGGAGCTCATCAGA  
ATGATAAAAAGAGGGGTTAATGACCGTAATTTCTGGAGAGGTGAAAATGGAAGAAGAACAAAGAAATTGCTT  
ATGAGAGAATGTGCAACATCCTCAAAGGGAAATTCAAACCGGCAGCACACGAGCTATGATGGATCAGGT  
CAGAGAAAAGCCGTAATCCTGGAAATGCTGAAATGAAGACCTCATCTTTTTGGCCAGGTCTGCCCTTATT  
CTGAGGGGGGCGAGTAGCTCATAAATCATGCCTGCCTGTGTGTATGGACTTGCTGTAGCAAGTGGAT  
ATGAATTCGAGAGGGAAGGATATCCCTTGTGGGATAGACCTTTTCGTCTGCTCCAGAACAGCCAAGT  
GTTTCAGTCTAATCCGACCAATGAAAATCCGGCACACAAGAGCCAATTGGTATGGATGGCATGTCATTCT  
GCTGCATTTGAGGATTTGAGAGTGTCAAGCTTCATCAGAGGAGCAAGAGTGTACCAAGAGGGCAACTAT  
CCACAAGAGGTGTTCAAATTCGCTCCAACGAGAACATGGAGACTATGAGTTCCAGCACCTTGAATTAAG  
GAGCAAATACTGGCAATAAGGACTAGAAGCGGAGGAAACACCAGCCAACAAGAGCATCAGCAGGGCAA  
ATCAGTGTACAACCTACTTTTTCAGTACAAGAACTCCCTTTTGAAGAGCGACAATCATGGCTGCAT  
TCACAGGAAATGCAGAAGGAAGAACATCCGATATGAGGACTGAGATCATACGGATGATGAAAAGTGCAAG  
ACCAGAAGATGTGTCTTTCCAGGGGCGGGGAGTCTTCGAGCTCTCGGACGAAAAGGCCACGAACCCGATC  
GTGCCTTCCTTTGACATGAGTAAAGAAGGATCTTATTTCTTCGGAGACAACGCTGAGGAGTTTGACAGTT  
GAAGAAAAATACCTTTTCTACT

>iavh1n11922|A/Mute\_Swan/Netherlands/2/2022|EPI\_ISL\_15364797|A/Mute\_Swan/Netherlands/2/2022|NP|5||A/Mute\_Swan/Netherlands/2/2022

GTAGATAACTACTACTGAGTGACATCAACATCATGGCGTCTCAAGGCACCAAACGATCTTATGAACAGA  
TGGAAACTGGTGGGGAGCGCCAGAATGCCACTGAGATCAGAGCATCTGTTGGGAGAATGGTTGGTGGAAAT  
TGGGAGGTTCTACATACAGATGTGCACTGAGCTCAAACCTCAGCGACTATGAAGGAAGGCTGATCCAGAAC  
AGCATAACAATAGAGAGAATGGTTCTCTGCAATTTGATGAAAGGAGGAACAATATCTGGAAGAATC  
CCAGTGCGGGGAAAGGACCGGAAGAAAACCTGGAGGTCCAATTTATCGAAGGAGAGATGGGAAATGGATGAG  
AGAACTGATCCTGTATGACAAAGAGGAGATCAGGAGAATCTGGCGTCAAGCGAATAATGGAGAAGACGCA  
ACTGCTGGTCTCACTCACCTGATGATCTGGCATTCCAATCTAAATGATGCCACATACCAGAGGACAAGAG  
CTCTCGTGCAGGACTGGGATGACCCAGGATGTGCTCTTATGCAAGGATCAACTCTCCCAAGGAGGTC  
TGGAGCTGCTGGTGCAGCAGTAAAGGGAGTCCGGACGATGGTGGTGAAGTAAATTCGGATGATAAAGCGA  
GGAATTAATGATCGGAATCTTGGAGAGGCGGAGAACGGGCGAAGGACAAGGATTGCATATGAGAGAATGT  
GCAACATCCTCAAAGGGAAATTCCAAACAGCATCACAAGAGCAATGATGGATCAGGTGCGTGAAGCAG  
GAATCTGGCAATGCTGAAATGAAGATCTCATCTTTCTGGCACGGTCTGCACTCATCCTGAGAGGATCA  
GTGGCTCATAAGTCCTGCTTGCCTGTTGTGTACGGACTCGCTGTGGCCAGTGGATACGACTTTGAGA  
GAGAAGGGTACTCCCTAGTTGGAATAGATCCTTTCCGTCTGCTTCAAACAGCCAGGTTCTCAGTCTCAT  
TAGACCAAATGAGAATCCAGCACATAAGAGTCAATTTGGTGTGGATGGCATGTCATTCTGCAGCATTGAA  
GATCTAAGAGTCTCAAGTTTCATCAGAGGAACAAGAGTAGTTCCAAGAGGACAACATCCACAGAGGAG  
TTCAAATTGCTTCAAATGAGAATGAAACATGAAAACAATGGACTCCAGCACTTTGAACTGAGAAGCAGATATTG  
GGCTATAAGAACCAGGAGTGGAGGAAACCAACCAACAGAGATCTGCAGGACAATCAGTGTACAG  
CCCCTTTTTCTGTACAGAGAAATCTCCCTTCGAAAGAGCGACCATTATGGCGGCGTTCACAGGGAATA  
CTGAGGGCAGAACATCCGACATGAGGACTGAAATCATAAGAATGATGAAAAGTCCAGACCAGAAGATGT  
GTCTTTCCAGGGGCGGGGAGTCTTCGAGCTCTCGGACGAAAAGGCAACGAACCCGATCGTGCCTTCTTT  
GACATGAGTAATGAAGATCTTATTTCTTCGGAGACAATGCAGAGGAGTATGACAATAAAAGAAAATAC

>iavh1n11922|A/Barry/3792/2022|EPI\_ISL\_15391170|A/Barry/3792/2022|NP|5||A/Barry/3792/2022

CAGCAAAAGCAGGGTTGATAACTACTACTGAGTGACATCAAATCATGGCGTCCAAGGCACCAAACGG  
TCTTATGAACAGATGAAAATGATGGAGACCCGAGAAATGCAACTGAGATTAGGGCATCCGTCGGGAAGA  
TGATTGATGGGATTGGGAGATTCTACATCAAATGTGCACTGAACTTAAACTCAGTATCATGAAGGACG  
GTTGATCCAAAATAGCTTGACAATAGAGAAAATGGTACTCTGCTTTTGATGAAAGAAGGAATAAATAC  
TTGAAAGAACACCCAGCGCGGGGAAAGATCCCAAGAAAATGGGGGCCATATACAGAAGATCGATG  
GAAAATGGATGAGGAACTCGTCTTTATGACAAAGAGGAAATAAGGCGAATCTGGCGCAAGCCAACAA  
TGTTGAGGATGCTACATCTGGTCTAACCCACATGATGATTTGGCATTCCAATCTGAATGATGCGCAGATC

CAGAGGACAAGAGCTCTTGTTCCGACTGGAATGGATCCCAGAATGTGCTCTCTGATGCAGGGGTCGACTC  
TCCCTAGAAAGGTCCGGAGCTGCAGGTGCTGCAGTCAAAGGAATCGGAACAATGGTGATGGAACGTATCAG  
GATGATCAAACGGGGGATCAACGATCGAAATTTTTGGAGAGGTGAGAATGGCGGAAAACAAGAAGTGCT  
TATGATAGAATGTGCAACATTCTTAAAGGAAAATTTCAAACAGCTGCACAAAGCAATGGTGATCAAG  
TTAGAGAAAAGTCCGGAACCCAGGAAACGCTGAGATCGAAGATCTCATATTTTTGGCAAGATCTGCAGT  
ATTGAGAGGATCAGTTGCTCACAATCTTGCCTACCTGCCTGTGCATATGGACCTGCAGTATCCAGTGGT  
TACGACTTTGAAAAGAGGGATATCTTGGTGGGAATAGACCCTTCAAACACTTCAAATAGCCAAA  
TATACAGCTTAATCAGACCTAATGAGAATCCAGCACACAAGAGTCAGCTGGTGGATGGCATGCCATTC  
TGCTGCATTTGAAGATTTAAGATTGTTAAGTTTCATCAGAGGGACAAAAGTATATCCTCGGGGAAAATG  
TCAACTAGAGGAGTACAATTTGCTTCAAATGAGAACATGGATAATATGGGATCAAGCACTTTGAACTGA  
GAAGCGGGTACTGGCCATAAGGACCAGGAGCGGAGGAAACACTAATCAACAGAGGGCCTCCGCAGGCCA  
AACCAGTGTCAACCTACATTTTTCTGTACAAAAGAACATCCATTTGAGAAGTCAACCATCATGGCAGCA  
TTCCTGGAATACAGAGGGAAGAACTTCAGACATGAGGGCAGAAATCATAAGGATGATGGAAGGTGCAA  
AACCAGAAGAAGTGTATTCCGGGGGAGGGGAGTTTTCCGAGCTCTCAGACGAGAAGGCAGCGAACCCGAT  
CGTGCCCTCTTTGATATGAGCAACGAAGGATCTTATTTCTTCGGAGACAATGCAGAAGAGTATGACAAT  
TAAGAAAAAATACCCCTTGTCTACTGATC

>NDN12092022\_H13N6\_NP\_5

AGCAAAAGCAGGGTAGATAATCACTCACTGAGTGACATCCACATCATGGCGTCTCAGGGCACCAACGAT  
CCTATGAGCAGATGGAACCTGGTGGTGAACGCCAGAATGCCACTGAGATTCGAGCATCTGTCGGAAGGAT  
GGTTGGAGGAATCGGAAGATTCTACATACAGATGTGCACTGAACTCAAAGTGAATGAAGGAAGG  
CTGATACAAAACAGTATCACAATAGAGAGGATGGTCTGTCTGCATTTGATGAGAGGAGGAACAGATACT  
TGGAGGAGCATCCAGTGTGGGAGGGACCCAAAAGAAAAGTGGTGGACCAATTTACAGAAGGAGAGAAGG  
GAAATGGGTGAGAGAATGGTCTATATGACAAGGAAGAAATAAGAAGAATCTGGCGACAGGCAACAAT  
GGAGAAGATTCGACTGTGGCCTCACTCATTGATGATCTGGCATTCTAATTTGAATGATGCCACATATC  
AGAGGACCAGAGCCCTAGTGCCTACCGGGATGGACCCAGGATGTGCTCCCTCATGCAGGGATCGACACT  
CCCAAGAAGGTCTGGAGCGGCTGGTGCAGCTGTGAAAGAGTTGGGACAATGGTGATGGAGCTCATCAGA  
ATGATAAAAAGAGGGGTTAATGACCGTAACTTCTGGAGAGGTGAAAATGGGAGAAGAACAAGAATTGCTT  
ATGAGAGGATGTGCAACATCTCAAAGGAAAATTCAAAACAGCAGCACAAACGAGCTATGATGGACCAGGT  
CAGAGAAAGCCGTAATCTGAAAATGCTGAAAATGAAGACCTCATTTTTGGCCAGGTCTGCCCTTATT  
CTGAGGGGAGCAGTAGCTCATAAATCATGCCTGCCTGCCTGCTGTATGGACTTGCTGTAGCAAGTGGGT  
ATGACTTCGAAAGGGAAGGATATCCCTTGTGGGATAGACCTTTCCGCTGCTCCAAAACAGCCAAGT  
GTTCACTTAATCCGACCAATGAAAACCCAGCACACAAGAGCCAATGGTATGGATGGCATGCTATTCT  
GCTGCATTTGAGGATTTGAGAGTGTCAAGCTTATCAGGGGAGCAAGAGTGTGGCAAGAGGGCAACTAT  
CCACAAGAGGTGTTCAAATGCGTCCAACGAGAACATGGAGACTATGAGTTCCAGCACACTTGAATTAAG  
GAGCAAATACTGGGCAATAAGGACTAGAAGCGGAGGAAACCAACCAACAAAGAGCATCAGCAGGGCAA  
ATCAGTGTACAACCTACTTTTTAGTACAAGAACTCCCTTTGAAAGAGCGACAATCATGGCTGCAT  
TCACAGGAAATGCAAGAAGAAACATCCGATATGAGGACTGAGATCATACGGATGATGAAAAGTGCAAG  
ACCAGAAGATGTGCTTTCCAGGGGCGGGGAGTCTTCGAGCTCTCAGACGAAAAGGCCACGAACCCGATC  
GTGCCCTCTTTGACATGAGTAAAGAAGGATCTTATTTCTTCGGAGACAATGCTGAGGAGTTTGACAGTT  
GAAGAAAAAATACCCCTTGTCTACT

>ENN12092022\_H13N6\_NP\_5

AGCAAAAGCAGGGTAGATAATCACTCACTGAGTGACATCCACATCATGGCGTCTCAGGGCACCAACGAT  
CTTATGAGCAGATGGAACCTGGTGGAGAACCAGCAATGCCACTGAGATTCGGGCATCTGTCGGAAGGAT  
GGTTGGAGGAATCGGAAGATTCTACATACAGATGTGCACTGAACTCAAATGAGTGAACAATGAGGGAAGG  
CTGATACAAAACAGTATCACAATAGAGAGGATGGTCTGTCTGCATTTGATGAGAGGAGGAACAGATATT  
TGGAGGAGCATCCAGTGTGGGAGAGACCCAAAAGAAAAGTGGTGGACCAATTTACAGAAGAAGAGAAGG

GAAATGGGTGAGAGAATTGGTCTATATGACAAGGAAGAGATAAGACGAATCTGGCGGCAGGCAAACAAT  
GGAGAAGATTGACTGCTGGCCTACCCATCTGATGATCTGGCATTCTAATTTGAATGATGCCACATACC  
AGAGGACCAGAGCCCTAGTGCGCACCGGGATGGACCCAGGATGTGCTCCCTCATGCAGGGATCGACACT  
CCCAAGGAGGTCTGGGGCGGCTGGTGCAGCTGTAAAAGGGTTGGGACAATGTAATGGAGCTCATCAGA  
ATGATCAAAGAGGGGTTAATGACCGAAACTTCTGGAGAGGTGAAAATGGGAGAAGCAAGAATTGCTT  
ATGAGAGGATGTGCAACATCCTCAAAGGAAATTCCAAACAGCAGCACAGCGAGCTATGATGGACCAGT  
CAGAGAAAGCCGTAATCCTGGTAATGCTGAGATTGAAGACCTCATATTTTGGCAAGGTCTGCCCTTATT  
CTAAGGGGAGCTGTGGCTCATAAATCATGTCTGCCTGCCTGCGTGTATGGACTTGTGTAGCAAGTGGAT  
ATGACTTCGAAAGGGAAGGATATCCCTTGTGGGATAGACCTTTCCGTCTGTCCAAAACAGCCAAGT  
GTTTAGTCTAATCCGACCAATGAAAATCCAGCACACAAGAGCCAATTGGTATGGATGGCGTGTATTCT  
GCTGCATTTGAGGATTTGAGAGTGTCAAGCTTCATCAGGGGAACAAGAGTGTGGCCAGAGGGCAACTAT  
CTACAAGAGGGGTTCAAATGCATCCAACGAGAACATGGAGACTATGAGTTCCAGCACACTTGAACAAAG  
GAGCAAGTACTGGGCAATAAGGACTAGAAGCGGAGGAAATACCAACCAACAAGAGCATCAGCAGGACAA  
ATCAGTGTACAACCTACCTTTTTCAGTACAAGGAACCTCCCTTTTGAAGAGCGACAATCATGGTGCAT  
TCACAGGAAATGCAGAAGGAAGAACATCCGATATGAGGACTGAGATCATAACGGATGATGAAAAGTGCAAG  
ACCAGAAGATGTGCTTTCCAGGGGCGGGGAGTCTTCGAGCTCTCAGACGAAAAGGCCACGAACCCGATC  
GTGCCTTCCTTTGACATGAGTAAAGAAGGATCTTATTTCTTCGGAGACAATGCTGAGGAGTTTGACAGTT  
GAAGAAAAATACCTTGTCTACT  
>BEL12092022\_H13N6\_NP\_5  
AGCAAAAGCAGGGTAGATAATCACTCACTGAGTGACATCCACATCATGGCGTCTCAAGGCACCAACGAT  
CTTATGAGCAGATGGAAACTGGTGGTGAACGCCAGAAATGCCACTGAGATTGCGGGCATGTGCGGAAGGAT  
GGTTGGAGGAATCGGAAGATTCTACATACAGATGTGCACTGAACTCAAAGTGAATGACAATGAAGGAAGG  
CTGATACAAAACAGTATCACAATAGAGAGGATGGTCTGTCTGCATTTGATGAGAGGAGGAACAGATACT  
TGGAGGAGCATCCAGTCTGGGAGGACCCCAAGAAAAGTGGTGGACCAATTACAGAAGGAGAGAGGG  
GAAATGGGTGAGAGAATTGGTCTATATGACAAGGAAGAAATAAGAAGAATCTGGCGACAGGCAAACAAT  
GGAGAAGATTGACTGCTGGCCTCACCCATTTGATGATCTGGCATTCTAATTTGAATGATGCCACATATC  
AGAGGACCAGAGCCCTAGTGTGCGCACCGGGATGGACCCAGGATGTGCTCCCTCATGCAGGGATCGACACT  
CCCAAGAAGGTCTGGAGCGGCTGGTGCAGCTGTAAAAGGAGTTGGGACAATGGTGTATGGAGCTCATCAGA  
ATGATAAAAAGAGGGGTTAATGACCGTAACTTCTGGAGAGGTGAAAATGGGAGAAGAACAAGAATTGCTT  
ATGAGAGGATGTGCAACATCCTCAAAGGAAATCCAAACAGCAGCACACAGCTATGATGGACCAGGT  
CAGAGAAAGCCGTAATCCTGGAAATGCTGAAATGAAGACCTCATTTTTTGGCCAGGTCTGCCCTTATT  
CTAAGGGGAGCTGTAGCTCATAAATCATGCCTGCCTGCCTGTGTGTATGGACTTGTGTAGCAAGTGGAT  
ATGACTTCGAAAGGGAAGGATATCCCTTGTGGGATAGACCTTTCCGTCTGTCCAAAACAGCCAAGT  
GTTTCAATCCGACCAATGAAAATCCAGCACACAAGAGCCAATTGGTATGGATGGCATGTCTATTCT  
GCTGCATTTGAGGATTTGAGAGTGTCAAGCTTCATCAGGGGAGCAAGAGTGTGGCAAGAGGGCAACTAT  
CCACAAGAGGTGTTCAAATGCGTCCAACGAGAACATGGAGACTATGAGTTCCAGCACACTTGAATTAAG  
GAGCAAATACTGGCAATAAGGACTAGAAGCGGAGGAAACCAACCAACAAGAGCATCAGCAGGACAA  
ATCAGTGTACAACCTACTTTTTTTCAGTACAAGAAAGAAACCTCCCTTTTGAAGAGCGACAATCATGGTGCAT  
TCACAGGAAATGCAGAAGGAAGAACATCCGATATGAGGACTGAGATCATAACGGATGATGAAAAGTGCAAG  
ACCAGAAGATGTGCTTTCCAGGGGCGGGGAGTCTTCGAGCTCTCAGACGAAAAGGCCACGAACCCGATC  
GTGCCTTCCTTTGACATGAGTAAAGAAGGATCTTATTTCTTCGGAGACAATGCTGAGGAGTTTGACAGTT  
GAAGAAAAATACCTTGTCTACT  
>BEL10102022\_H1N1\_NP\_5  
ATGGCGTCTCAAGGCACCAACGATCATATGAACAAATGGAGACTGGTGGGGAGCGCCAGGATACCAACAG  
AAATCAGAGCATCTGTTGGAAGAATGATTGGTGAATCGGGAGATTCTATATCCAAATGTGCACTGAACT  
AAAACCTCAGTGATTATGATGGACGACTAATCCAGAACAGCATAACAATAGAGAGGATGGTGTCTTCTGCT

TTTGATGAGAGAAGAAATAAATACCTAGAAGAGCATCCAAGTGCTGGGAAGGACCCTAAGAAAACAGGAG  
GACCCATCTATAGAAGAATAGACGAAAAATGGACAAGAGAACTATCCTTTATGACAAAGNAGAAAATAAG  
GAGAGTTTGGCGCCAAGCAAACAATGGCGAAGATGCAACAGCAGGTCTTACTCATATCATGATTTGGCAT  
TCCAATCTGAATGATGCCACATATCAGAGGACAAGAGCACTTGTTCGCACTGGAATGGATCCCAGAATGT  
GCTCTCTAATGCAAGGTTCAACACTTCCCAGAAGGTCCGGTCCCGCAGGTGCTGCAGTAAAAGGAGTTGG  
AACAAATAGCTATGGAGTTAATCAGAATGATAAAACGTGGAATCAATGACCGAAATTTCTGGAGGGGTGAA  
AATAGACGAAGGACAAGAGTTGCTTATGAAAGAATGTGCAATATCCTCAAAGGAAAGTTTCAAACAGCTG  
CTCAGAGGGCAATGATGGATCAAGTAAGGGAAAGCCGAAACCCAGGAAACGCTGAGATTGAAGACCTCAT  
TTTCTGGCGCGGTCAGCACTCATTCTGAGAGGATCAGTTGCACATAAATCCTGCCTGCCTGCTTGTGTG  
TATGGGCTTGCAGTAGCAAGTGGCCATGACTTTGAAAGGGAAGGGTACTCATTGGTCGGGATAGACCCGT  
TCAAATTAAGTCCAAAACAGTCAAGTGGTCAGCCTGATGAGACCAAATGAAAATCCAGCTCACAAGAGTCA  
ATTGGTATGGATGGCATGCCACTCTGCTGCATTTGAAGATTTAAGAGTATCAAGTTTCATAAGAGGAAAG  
AAGGTGATCCCAAGAGGAAAGCTTCCACAAGAGGGGTTGAGATTGCTTCAAATGAGAATGTGAAACCA  
TGGACTCCAATACCATGAACTAAGAAGCAGATACTGGGCCATAAGAACCAGGAGTGGAGGAAATACCAA  
TCAACAGAAGGCATCTGCAGGCCAGATCAGTGTGCAGCCTACATTCTCAGTGCAGCGAAATCTCCCTTT  
GAAAGAGCAACCATTATGGCAGCATTGAGCGGGAACAATGAAGGACGGACATCCGACATGCGAACAGAA  
TTATAAGAATGATGGAAAGTGCAAAGCCAGAGGATTTGCTTCCAGGGCGGGGAGTCTTCGAGCTCTC  
GGACGAAAAGGCAACGAACCCGATCGTGCCTTCTTTGACATGAGTAACGAAGGGTCTTATTTCTTCGGA  
GACAATGCAGAGGAGTATGACAATTGA

>BEL28112022\_H1N1\_NP\_5

ATGGCGTCTCAAGGCACCAACGATCATATGAACAAATGGAGACTGGTGGGGAGCGCCAGGATACCCACAG  
AAATCAGAGCATCTGTTGGAAGAATGATTGGTGAATCGGGAGATTCTATATCCAAATGTGCACTGAACT  
AAAACCTCAGTGATTATGATGGACGACTAATCCAGAACAGCATAACAATAGAGAGGATGGTCTTTCTGCT  
TTTGATGAGAGAAGAAATAAATACCTAGAAGAGCATCCAAGTGCTGGGAAGGACCCTAAGAAAACAGGAG  
GACCCATCTATAGAAGAATAGACGAAAAATGGACAAGAGAACTATCCTTTATGACAAAGNAGAAAATAAG  
GAGAGTTTGGCGCCAAGCAAACAATGGCGAAGATGCAACAGCAGGTCTTACTCATATCATGATTTGGCAT  
TCCAATCTGAATGATGCCACATATCAGAGGACAAGAGCACTTGTTCGCACTGGAATGGATCCCAGAATGT  
GCTCTCTAATGCAAGGTTCAACACTTCCCAGAAGGTCCGGTCCCGCAGGTGCTGCAGTAAAAGGAGTTGG  
AACAAATAGCTATGGAGTTAATCAGAATGATAAAACGTGGAATCAATGACCGAAATTTCTGGAGGGGTGAA  
AATGGACGAAGGACAAGAGTTGCTTATGAAAGAATGTGCAATATCCTCAAAGGAAATTTCAAACAGCTG  
CTCAGAGGGCAATGATGGATCAAGTAAGGGAAAGCCGAAACCCAGGAAACGCTGAGATTGAAGACCTCAT  
TTTCTGGCGCGGTCAGCACTCATTCTGAGAGGATCAGTTGCACATAAATCCTGCCTGCCTGCTTGTGTG  
TATGGGCTTGCAGTAGCAAGTGGCCATGACTTTGAAAGGGAAGGGTACTCATTGGTCGGGATAGACCCGT  
TCAAATTAAGTCCAAAACAGTCAAGTGGTCAGCCTGATGAGACCAAATGAAAATCCAGCTCACAAGAGTCA  
ATTGGTATGGATGGCATGCCACTCTGCTGCATTTGAAGATTTAAGAGTATCAAGTTTCATAAGAGGAAAG  
AAGGTGATCCCAAGAGGAAAGCTTCCACAAGAGGGGTTGAGATTGCTTCAAATGAGAATGTGAAACCA  
TGGACTCCAATACCCTGAACTAAGAAGCAGATACTGGGCCATAAGAACCAGGAGTGGAGGAAATACCAA  
TCAACAGAAGGCATCTGCAGGCCAGATCAGTGTGCAGCCTACATTCTCAGTGCAGCGAAATCTCCCTTT  
GAAAGAGCAACCATTATGGCAGCATTGAGCGGGAACAATGAAGGACGGACATCCGACATGCGAACAGAA  
TTATAAGAATGATGGAAAGTGCAAAGCCAGAGGATTTGCTTCCAGGGCGGGGAGTCTTCGAGCTCTC  
GGACGAAAAGGCAACGAACCCGATCGTGCCTTCTTTGACATGAGTAATGAAGGGTCTTATTTCTTCGGA  
GACAATGCAGAGGAGTATGACAATTGA

>NC\_026434.1 Influenza A virus (A/California/07/2009(H1N1)) segment 6 neuraminidase (NA) gene, complete cds

ATGAATCCAAACCAAAAGATAATAACCATTGGTTCCGGTCTGTATGACAAATGGAATGGCTAACTTAATAT  
TACAAATTGGAACATAATCTCAATATGGATTAGCCACTCAATCAACTTGGGAATCAAATCAGATTGA  
AACATGCAATCAAAGCGTACTTACTTATGAAAACAACACTTGGGTAATCAGACATATGTTAACATCAGC

AACACCAACTTTGCTGCTGGACAGTCAGTGGTTCCGTGAAATTAGCGGGCAATTCCTCTCTGCCCCTG  
TTAGTGGATGGGCTATATACAGTAAAGACAACAGTGTAAGAATCGTTCCAAGGGGGATGTTTGTTCAT  
AAGGGAACCATTCATATCATGCTCCCCCTTGGAAATGCAGAACCTTCTTCTGACTCAAGGGGCTTGCTA  
AATGACAAAACATTCGAATGGAACCAATTAAGACAGGAGCCCATATCGAACCTAATGAGCTGTCTATTG  
GTGAAGTTCCCTCTCCATACAACCTCAAGATTTGAGTCAGTCGCTTGGTCAGCAAGTCTTGTTCATGATGG  
CATCAATTGGCTAACAAATGGAATTTCTGGCCAGACAATGGGGCAGTGGCTGTGTTAAAGTACAACGGC  
ATAATAACAGACACTATCAAGAGTTGGAGAAACAATATATTGAGAACAACAAGTCTGAATGTGCATGTG  
TAAATGGTTCTTGTCTTACTGTAATGACCGATGGACCAAGTAATGGACAGGCCATACAAGATCTTCAG  
AATAGAAAAGGGAAAGATGTCAAATCAGTCGAAATGAATGCCCCAATTATCACTATGAGGAATGCTCC  
TGTATCTGATTCTAGTGAATCACATGTGTGTGCAGGGATAACTGGCATGGCTCGAATCGACCGTGGG  
TGTCTTCAACCGAATCTGGAATATCAGATAGGATACATATGCAGTGGGATTTTCGGAGACAATCCACG  
CCCTAATGATAAGACAGGCAGTTGTGGTCCAGTATCGTCTAATGGAGCAAATGGAGTAAAGGGTTTTCA  
TTCAAATACGGCAATGGTGTGGATAGGGAGAACTAAAAGCATTAGTTCAAGAAACGGTTTTGAGATGA  
TTTGGGATCCGAACGGATGGACTGGGACAGACAATAACTTCTCAATAAAGCAAGATATCGTAGGAATAAA  
TGAGTGGTCAGGATATAGCGGGAGTTTTGTTTCAGCATCCAGAATAACAGGGCTGGATTGTATAAGACCT  
TGCTTCTGGGTTGAACATAATCAGAGGGCGACCCAAGAGAACACAATCTGGACTAGCGGGAGCAGCATAT  
CCTTTTGTGGTGAACAGTGACACTGTGGGTTGGTCTTGGCCAGACGGTGTGAGTTGCCATTACCAT  
TGACAAGTAA

>MF575134.1 Influenza A virus (A/black-headed gull/Netherlands/31/2014(H13N6)) segment 6 neuraminidase (NA) gene, complete cds

AGCAAAAGCAGGGTGACAATGAATCCAATCAGAAGATAATATGCATCTCAGCTACAGGAATGACTACTAT  
CGGTAGTAAAGCCTCCTGATAGGAATTGCCAACTTAGGTTTGAACATCGGACTCCATTACAAGGTTTGTGA  
TGCACCGAATTCACCTAGTCAATGGGAATGGCACAACAACAACAATAATCAACAACAATACT  
AACAAATTCACAACATCACCAACATTGTCCAGAATAAAAATGAGGAGAAGACATTTCTAAATTTAACTA  
AGCCTCTATGCGCTGCAACTCATGGCACATCCTGTCAAAGGACAATGCAATAAGAATTGGAGAAAATGC  
TCACATATTAGTCACAAGGGAGCCTTACCTATCCTGTGACCCACAAGGGTGCAGAATGTTTGTCTAAGT  
CAAGGCACAACACTCAGGGGACAGCATGCAATGGAATGGAATGGAATGGAATGGAATGGAATGGAATGGAAT  
TAAAGTTGGGAAATGGGTCAGGCACCCAGTCCATATAATGTCAAAGTCAAGTATAGGTTGGTTCGAGCAC  
ATCATGCCATGACGGCAGGTCAAGAATGTCTATATGCATATCAGGACCAACAATAATGCTTCGGCTGTA  
GTATGGTATGGGGTAGACCAATAACTGAGATCCATCATGGGCAGGTAATATCTCAGAATCAAGAGT  
CAGAGTGTGTGTCATAAAGGAATTTGCCCGGTAGTCATGACAGATGGCCAGCAAATAATAAAGCAGC  
AACTAAAATAATTTACTTTAAAGAAGGGAAAATTCAAAAATGAAGATCTGACAGGGAAACGCCAACAC  
ATTGAAGAATGCTCATGCTATGGAGCAAAAGGAGTATCAATGCATGTCAGAGACAATTGGAAGGGAG  
CAAATAGGCCAGTAATCACTATAGATCCTGAAATGATGACCCACAGCAGCAAATATTTGTGTTCAAAGT  
CCTAACTGATACTAGTCGTTCCAATGATCCAATAATGGGAATGCGACGCACCAATAACAGGGGGAGGC  
CCGGACCTGGAGTCAAAGGATTTGCATTCCTAGATGGGGAAAATTCATGGCTGGGGAGGACAATTAGCA  
AAGACTCCAGGTCAAGTTACGAAATGCTAAAAGTCCAAATGCGGAAACAGCACTCAATCTGGTCCAAT  
CGCAAACCAAGTGATTGTCAACAACAGAACTGGTCAGGATACTCAGGAGCATTATAGACTACTGGGCA  
AACAAAAGATGCTTTAATCCCTGTTTCTATGTAGAGCTTATTAGAGGAAACCTAAAGAAAGCAGTGAT  
TGTGGACTTCAAATAGCATTGTAGCCCTTTCGGGATCCAAGGAGCGATTGGGATCATGGTCTGGCATGA  
TGGTGCAGAAATCATCTACTTTAAGTAGCAATGATTAAGAAAACACCCTTGTCTACT

>iavh1n11922|A/Mute\_Swan/Netherlands/2/2022|EPI\_ISL\_15364797|A/Mute\_Swan/Netherlands/2/2022|NA|6||A/Mute\_Swan/Netherlands/2/2022

TTCAAAATGAATCCAATCAAAGGATAATAACCACTGGATCAATCTGTATGGCAATTGGGATAGTCAGCT  
TGATGCTGCAAATTGGAACATAATCTCAATATGGGTTAGCCATTCAATCCAACAGGGAATCAATACCA  
GCCTGAACCATGCAATCAAAGCATATTACCTATGAGAACAACACCTGGTAAATCAGACGTATGTCAAC  
ATCATCAATACCAATTTCTTGTGAGCAGGCTGTACTTCGGTAAACATTAGCGGGCAATTCATCTCTTT  
GCCCTATTAGTGGGTGGCTATATACAGTAAAGACAACGGTATAAGAATTGGGTTCAAGGGGGATGTGT

TGTTATAAGAGAACCGTTCATCTCTTCTGCTCCCACTTGGAAATGCAGAACCTTTTTNCTGACCCAGGGAGCT  
CTGCTGAATGACAAACATCTAATGGGACCGTTAAGGATAGAAGCCCCATAGAACTTTGATGAGTTGTC  
CCGTGGGTGAGGCTCCTTCCCCGTACAATCAAGATTTGAGTCTGTGCTTGGTCGGCAAGTGCTTGTCA  
TGATGGCATCAGTTGGCTGACAATCGGTATTTCTGGTCCAGACAATGGAGCTGTGGCTGATTGAAGTAC  
AATGGCATAATAACGGATACTATCAAGAGTTGGAGGAACAACATTTTGGAGAACTCAAGAATCTGAATGTG  
CGTGCGTAAATGGCTCTTGTCTCACTGTAATGACTGATGGACCAAGCAATGGGCAGGCCTCATATAAAAT  
CTTCAAGATAGAGAAAAGGGAAAAGTAGTCAAATCAGTTGAATTGAATGCCCTAATTACCACTACGAGGAA  
TGCTCCTGTTATCCTGATGCGGGTGAGATTATGTGTGTTGCAGGGACAATGGCATGGCTCAAACCGGC  
CGTGGGTATCTTTAACCAAAATCTGGAGTATCAAATAGGATATATATGCAGTGGGGTTTTCGGAGACAA  
CCCCCGCCCAATGACGGAAACAGGCAGTTGCAGTCCAATGTCCTTAACGGGGCATATGGGGTAAAAGGG  
TTTTCATTTAAGTACGGTAATGGGGTTTGGATCGGAAGAACAAAAGCACTAGTCCAGGAGCGGCTTTG  
AGATGATTTGGGATCCGAATGGGTGGACTGAGACGGACAGTAGTTTCTCAGTGAAGCAAGACATCGTAGC  
AATAACTGACTGGTCAAGATATAGTGGGACTTTTGTCCAGCACCCAGAAGTACAGGATTAGATTGCATG  
AGGCCTTGTCTGGGTGAGCTGATTAGAGGGAGGCCAAAGAGAACAATTTGGACTAGCGGGAGCA  
GTATATCCTTTTGTGGTGAATAGTGACACTGTGGGTGGTGTGCGCCAGACGGTGTGAATTGCCATT  
CACCATTGACAAGTAGTTTGTTCAAAAAACT

>iavh1n11922|A/Barry/3792/2022|EPI\_ISL\_15391170|A/Barry/3792/2022|NA|6||A/Barry/3792/2022

AGCAAAAAGCAGGAGTAAAGATGAATCCAATCAAAGATAATAACGATTGGCTCTGTTTCTCTCACAATT  
TCCACAATATGCTTCTCATGCAAAATGCCATCCTGATAACTACTGTAACATTGCATTTCAAGCAATATG  
AATTCAACTCCCCCAATAACCAAGTGATGCTGTGTGAACCAACAATAATAGAAAGAAACATAACAGA  
GATAGTGTATTTGACCAACACCACCATAGAGAAGGAAATATGCCCAACCAAGCAGAATACAGAAATTGG  
TCAAAACCGCAATGTGGCATTACAGGATTTGCACCTTTCTTAAGGACAATTCGATTAGGCTTTCCGCTG  
GTGGGGACATATGGGTGACAAGAGAACCGTATGTGTCATGCGATCTTGACAAGTGTATCAATTTGCCCT  
TGGACAGGGAACAACACTAAACAATGTGCATTCAAATAACACAGTACATGATAGAACCCCTTATCGGACT  
CTATTGATGAATGAGTTGGGTGTTCCCTTCCATCTGGGGACCAAGCAAGTGTGCATAGCATGGTCCAGCT  
CAAGTTGTACAGATGGAAAAGCATGGCTGCATGTTTGTATAACGGGGGATGATAAAAATGCAACTGCTAG  
CTTCATTTACAATGGGAGGCTTGTAGATAGTGTGTTTTCATGTCACACGATATTCTCAGAACCAGGAG  
TCAGAATGCGTTGTATCAATGGAACCTGTACAGTAGTAATGACTGATGGAATGCTACAGGAAAAGCTG  
ATACTAAAATACTATTATTGAGGAGGGGAAAATCGTTCATACTAGCAAATGTCAGGAAGTGTCTCAGCA  
TGTGGAAGAGTGTCTTGTCTATCCTCGATATCCTGGTGTGAGATGTGTCGAGAGACAACCTGGAAGGA  
TCCAACCGGCCATCATAGATATAAACATAAAGGATCATAGCATTGTTCCAGGTATGTGTCTGGAC  
TTGTTGGAGACACACCAGAAAAAGCGACAGCTCCAGCAGTAGCCACTGTTTGAACCCTAACAATGAAAA  
AGGTGATCATGGAGTGAAGGCTGGGCCTTTGATGATGGAATGACGTGTGGATGGGGAGAACAATCAAC  
GAGACGTCACGCTTAGGGTATGAAACCTTCAAAGTCGTTGAAGGCTGGTCCAACCTAAGTCCAAATTGC  
AGATAAATAGGCAAGTCATAGTTAATAGAGGCGATAGGTCCGGTTATTCTGGTATTTCTCTGTTGAAGG  
CAAAAGCTGCATCAATCGGTGCTTTTATGTGGAGTTGATTAGGGGAAGAAAAGAGGAAAAGTGAAGTCTTG  
TGGACTTCAAACAGTATTGTTGTGTTTGTGGCACCTCAGGTACATATGGAACAGGCTCATGGCCTGATG  
GGGCGAACCTCAGTCTCATGCATACATAAGCTTTCGCAATTTAGAAAAAAC

>BEL12092022\_H13N6\_NA\_6

AGCAAAAAGCAGGGTGACAATGAATCCAATCAGAAGAGCATATGCATCTCAGTACAGGAATGACACTAT  
CGGTAGTAAGCCTTCTGATAGGAATAGCCAACCTTAGGTTTGAACATCGGACTCCACTACAAGGTTTGTGA  
TATACCAGATTACCTAGCTCAAATGGGAATGGAACAACAACAACAACGATAATCAACAACAATACT  
AACCAATTCACAACATCACTAACATTGTCCAAAACAAAAATCAGGAGAAGACATTTCTAAATTAACCTA  
AGCCCTATGCGCTGCAACTCATGGCACATCCTGTCAAAGGACAATGCAACAAGAATTGGAGAAAATGC  
TCACATATTAGTCACAAGGGAGCCTTACCTATCCTGTGACCCACAAGGGTGTAGAATGTTGCTCTAAGT  
CAAGGCACAACACTCAGAGGGTAACATGCAAAATGGGACTATACATGATAGAAGCCCGTTACAGACCCCTCG

TAAGTTGGGAAATGGGGCAGGCACCCAGTCCATATAATGTCAAAGTAGAATGTATAGGTTGGTCGAGCAC  
ATCATGCCATGACGGCAGGTCAAGAATGTCTATATGCATGTGACGACCAAAACAACATGCTTCTGCTGTA  
GTGTGGTATGGAGGTAGACTAATAACTGAGATTCCATCATGGGCAGGTAATATTCTCAGAACTCAAGAGT  
CAGAGTGTGTGCCATAAAGGATCTGCCGGTAGTCATGACAGATGGCCAGCAAATAATAAGGCAGC  
AACTAAAATAATTTACTTTAAAGAAGGGAAAAATTCAAAAAATTGAAGATTTGACAGGGAAACGCCAACAC  
ATTGAAGAATGCTCATGCTATGGAGCAAAGGGATTAATCAAATGCATCTGCAGGGATAATTGGAAGGGAG  
CAAATAGGCCAGTAATCACTATAGATCCAGAAATGATGACCCATAGCAGCAAACATTTGTGTTCAAAGGT  
CCTAACTGATACCAGTCGTCCAATGATCCAACCAATGGGAAGTGCAGCACCACCAATAACAGGGGGAGGC  
CCGGACCCTGGAGTCAAAGGATTTGCGTTCCTAGATGGGGAAAAATCCATGGCTAGGAAGGACAATCAGCA  
AAGACTCTAGGTCAGGTTACGAAGTGTAAAAGTTCAAATGCGGAAACCAGCACTCAATCTGGTCCAAT  
CGCACACCAAGTAATTGTCAAGAACCAGAACTGGTCAGGATACTCAGGGGCATTATAGACTACTGGGCA  
AACAAAGAATGCTTTAATCCCTGTTTCTATGTAGAATTAATTAGAGGGAAGCCTAAAGAAAGCAATGTGT  
TGTAGACTTCAAATAGCATTGTAGCCCTCGGTGGATCCAAGGAGCGATTGGGATCATGTCTCTGGCATGA  
TGGTGACAGAGATCATCTACTTTAAGTAGCAATGATTTAAGAAAAACACCCTTGTTTCTACT

>ENN12092022\_H13N6\_NA\_6

AGCAAAGCAGGGTGACAATGAATCCAATCAGAAGATAATGCATCTCAGCTACAGGAATGACACTAT  
CGGTAGTAAGCCTTTTGATAGGAATAGCCAACCTAGGTTTGAACATCGGACTCCACTACAAGGTTTGTGA  
TATACCAGATTCACCTAGCTCAAATGGGAATGGCACAAACACAACAACGATAATCAACAACATACT  
AACAAATTTACAAACATCACTAACATTGTCCAAAATAAAAAATGAAGAGAAAGACATTTCAAATTTAACTA  
AGCCCCATGCGCTGCAACTCATGGCACATCTGTCAAAGGACAATGCAATAAGAATTGGAGAAAAATGC  
TCACATATTAGTCACAAGGGAGCCCTTACCATCTGTGACCCACAAGGGTGTAGAATGTTTGCTCTAAGT  
CAAGGCCACAACACTCAGAGGGCAACATGCAATGGGACTATACATGATAGAAGCCGTTTCAAGGCCCTTG  
TAAGTTGGGAAATGGGGCAGGCACCCAGTCCATATAATGTCAAAGTAGAATGTATAGGTTGGTCGAGCAC  
ATCATGCCATGACGGCAGGTCAAGAATGTCTATATGCATGTGACGACCAAAACAACATGCTTCTGCTGTA  
GTGTGGTATGGAGGTAGACCAATAACTGAGATTCCATCATGGGCAGGGAATATTCTCAGAACTCAAGAGT  
CAGAGTGTGTGCCATAAAGGATCTGCCGGTAGTCATGACAGATGGCCAGCAAATAATAAGGCAGC  
AACTAAAATAATTTACTTTAAAGAAGGGAAAAATTCAAAAAATTGAAGATTTGACAGGGAAACGCCAACAC  
ATTGAAGAATGCTCATGCTATGGAGCAAAGGGATTAATCAAATGCATCTGCAGGGATAATTGGAAGGGAG  
CAAATAGGCCAGTAATCACTATAGATCCAGAAATGATGACCCATAGCAGCAAATATTGTGTTCAAAGGT  
CCTAACTGATACCAGTCGTCCAATGATCCAACCAATGGGAAGTGCAGCACCACCAATAACAGGGGGAGGC  
CCGGACCCTGGAGTCAAAGGATTTGCGTTCCTAGATGGGGAAAAATTCATGGCTAGGAAGGACAATCAGCA  
AAGACTCTAGGTCAGGTTACGAAGTGTAAAAGTTCAAATGCGGAAACCAGCACTCAATCTGGTCCAAT  
CGCACACCAAGTAATTGTGAACAACCAAGAACTGGTCAGGATACTCAGGGGCATTATAGACTACTGGGCA  
AACAAAGAATGCTTTAATCCCTGTTTCTATGTAGAATTAATTAGAGGGAAGCCTAAAGAAAGCAATGTGT  
TGTGGACTTCAAATAGCATTGTAGCCCTTGGCGGATCCAAGGAGCGATTGGGATCATGTCTCTGGCATGA  
TGGTGACAGAGATCATCTACTTTAAGTAGCAATGATTTAAGAAAAACACCCTTGTTTCTACT

>CRG12092022\_H1N1\_NA\_6

ATGAATCCAACCAAAAAGATAATAACCATTGGTTCTGTTTGTATGACAATTGGAACGGCTAACTTAATAT  
TACAAATTGGAACATAATCTCAATATGGGTTAGCCACTCAATTCAAATTGGAAATCAAAGCCAGATTGA  
AACATGCAATAAAAGCGTCATTACTTATGAAAACAACACTTGGGTAATCAGACATTTGTTAACATCAGC  
AACACTAACTCTGCTGCTAGACAGTCAGTGGCTTCCGTGAAATTAGCGGGCAATCTCTCTCTGCCCTG  
TTAGTGGATGGGCTATATACAGTAAAGACAACAGTGAAGAATCGGTTCCAAGGGGGATGTGTTTGTCTAT  
AAGGGAACCATTCATATCATGCTCCTCCTTGAATGCAGAACCTTCTTCTTACTCAAGGGGCTTTGCTA  
AATGACAAACATTCCAATGGAACAGTCAAAGACAGAAGCCCAATTCGAACCCATTAATGAGCTGCTCTATTG  
GTGAAGTCCCTCTCCATACAACCAAGATTTGAGTCAGTCGCTTGGTCAGCAAGTCTTGTCTATGATGG  
CACCAATTGGCTAACCAATTGGAATTTCTGCCCCAGACAGTGGGGCAGTGGCTGTGTTAAAATACAATGGC



ATAATAACAGACTATCAAGAGTTGGAGGAACAAGATATTGAGAACACAAGAGTCTGAATGTGCATGTG  
TAAATGGTTCTTGCTTTACCATAATGACTGATGGACCAAGTGATGGACAGGCCCTCATACAAAATCTTCAG  
AATAGAGAAGGGAAAGATAATCAAAATCAGTCGAAATGAAGGCCCTAATTATCACTATGAAGAATGCTCC  
TGTTACCCTGATTCTAGTGAATCACATGTGTGTGCAGGGATAATTGGCATGGCTCGAATCGACCTTGGG  
TGCTTTCAACCAGAATCTGGAATATCAGATGGGATACATATGCAGTGGGGTTTTTCGGAGACAATCCACG  
CCCTAATGATAAGACAGGCAGTTGTGGTCCAGTATTGTCTAATGGAGCAAATGGGGTAAAAGGATTTTCA  
TTCAAATACGGCAATGGTGTGGATAGGGAGAATAAGAGCATTAGTTCAAGAAAAGGTTTTGAGATGA  
TTTGGGATCCGAATGGATGGACTGGGACTGACAATAAATTTCAAAAAAGCAAGATATTGTAGGGATAAA  
TGAGTGGTCAGGGTATAGCGGGAGTTTTGTTCAGCATCCAGAATAACAGGGCTGAATTGTATAAGACCT  
TGCTTCTGGGTTGAACATAAAGAGGACGACCCGAAGAGAACACGATCTGGACTAGCGGGAGCAGCATAT  
CCTTTTGTGGTGTAGACAGTGACATTATGGGTTGGTCTTGCCAGACGGTGTGAGTTGCCATTACCCAT  
TGACAATTAA

>BEL10102022\_H1N1\_NA\_6

ATGAATCCAAACCAAAGATAATAACCATTGGTTCTGTTTGTATGACAATTGGAACGGCTAACTTAATAT  
TACAAATGGAAACATAATCTCAATATGGGTTAGCCACTCAATTCAAATTGGAAATCAAAGCCAGATTGA  
AACATGCAATAAAAGCGTCATTACTTATGAAAACAACACTTGGGTAATCAGACATTTGTTAACATCAGC  
AACACTAACTCTGCTGCTAGACAGTCAGTGGCTCCGTGAAATTAGCGGGCAATTCCTCTCTGCCCTG  
TTAGTGGATGGGCTATATACAGTAAAGACAACAGTGAAGAATCGGTTCCAAGGGGGATGTGTTTGCAT  
AAGGGAAACATTATATCATGCTCCCTTGGAAATGCAGAACCTTCTTCTGACTCAAGGGGCTTGCTA  
AATGACAAACATTCCAATGGAACAATCAAAGACAGAAGCCATATCGAACCTAATGAGCTGTCTATTG  
GTGAAGTTCCCTCTCCATACAACCTCAAGATTGAGTCAGTCGCTTGGTCAGCAAGTGCTTGCATGATGG  
CACCAATTGGCTAACAAATTGGAATTTCTGGCCAGACAGTGGGCAAGTGGCTGTGTTAAAATACAATGGC  
ATAATAACAGACTATCAAGAGTTGGAGGAACAAGATATTGAGAACACAAGAGTCTGAATGTGCATGTG  
TAAATGGTTCTTGCTTTACCATAATGACTGATGGACCAAGTGATGGACAGGCCCTCATACAAAATCTTCAG  
AATAGAGAAGGGAAAGATAATCAAAATCAGTCGAAATGAAGGCCCTAATTATCACTATGAAGAATGCTCC  
TGTTACCCTGATTCTAGTGAATCACATGTGTGTGCAGGGATAATTGGCATGGCTCGAATCGACCTTGGG  
TGCTTTCAACCAGAATCTGGAATATCAGATGGGATACATATGCAGTGGGGTTTTTCGGAGACAATCCACG  
CCCTAATGATAAGACAGGCAGTTGTGGTCCAGTATTGTCTAATGGAGCAAATGGGGTAAAAGGATTTTCA  
TTCAAATACGGCAATGGTGTGGATAGGGAGAATAAGAGCATTAGTTCAAGAAAAGGTTTTGAGATGA  
TTTGGGATCCGAATGGATGGACTGGGACTGACAATAAATTTCAAAAAAGCAAGATATTGTAGGGATAAA  
TGAGTGGTCAGGGTATAGCGGGAGTTTTGTTCAGCATCCAGAATAACAGGGCTGAATTGTATAAGACCT  
TGCTTCTGGGTTGAACATAAAGAGGACGACCCGAAGAGAACACGATCTGGACTAGCGGGAGCAGCATAT  
CCTTTTGTGGTGTAGACAGTGACATTATGGGTTGGTCTTGCCAGACGGTGTGAGTTGCCATTACCCAT  
TGACAATTAA

>BEL31102022\_H1N1\_NA\_6

ATGAATCCAAACCAAAGATAATAACCATTGGTTCTGTTTGTATGACAATTGGAACGGCTAACTTAATAT  
TACAAATGGAAACATAATCTCAATATGGGTTAGCCACTCAATTCAAATTGGAAATCAAAGCCAGATTGA  
AACATGCAATAAAAGCGTCATTACTTATGAAAACAACACTTGGGTAATCAGACATTTGTTAACATCAGC  
AACACTAACTCTGCTGCTAGACAGTCAGTGGCTCCGTGAAATTAGCGGGCAATTCCTCTCTGCCCTG  
TTAGTGGATGGGCTATATACAGTAAAGACAACAGTGAAGAATCGGTTCCAAGGGGGATGTGTTTGCAT  
AAGGGAAACATTATATCATGCTCCCTTGGAAATGCAGAACCTTCTTCTGACTCAAGGGGCTTGCTA  
AATGACAAACATTCCAATGGAACAATAAAGACAGAAGCCATATCGAACCTAATGAGCTGTCTATTG  
GTGAAGTTCCCTCTCCATACAACCTCAAGATTGAGTCAGTCGCTTGGTCAGCAAGTGCTTGCATGATGG  
CACCAATTGGCTAACAAATTGGAATTTCTGGCCAGACAGTGGGCAAGTGGCTGTGTTAAAATACAATGGC  
ATAATAACAGACTATCAAGAGTTGGAGGAACAAGATATTGAGAACACAAGAGTCTGAATGTGCATGTG  
TAAATGGTTCTTGCTTTACCATAATGACCGATGGACCAAGTGATGGACAGGCCCTCATACAAAATCTTCAG

AATAGAGAAGGAAAAGATAATCAAATCAGTCGAAATGAAGGCCCTAATTACTATGAAGAATGCTCC  
TGTTACCCTGATTCTAGTGAAATCACATGTGTGTGCAGGGATAATGGCATGGCTCGAATCGACCTTGGG  
TGTCTTTCAATCAGAATCTGGAATATCAGATGGGATACATATGCAGTGGGGTTTTTCGGAGACAATCCACG  
CCCTAATGATAAGACAGGCAGTTGTGGTCCAGTATTGTCTAATGGAGCAAATGGGGTAAAAGGATTTTCA  
TTCAAATACGGCAATGGTGTGGATAGGGAGAACTAAAAGCATTAGTTCAAGAAAAGTTTTGAGATGA  
TTTGGGATCCGAATGGATGGACTGGGACTGACAATAAATCTCAAAAAAGCAAGATATTGTAGGGATAAA  
TGAGTGGTCAGGGTATAGCGGGAGTTTTGTTCCAGCATCCAGAACTAACAGGGCTGAATTGTATAAGACCT  
TGCTTCTGGGTTGAACATAAAGAGGACGCCCGAAGAGAACACGATCTGGACTAGCGGGAGCAGCATAT  
CCTTTTGTGGTGTAGACAGTGACATTATGGGTTGGTCTTGGCCAGACGGTGCTGAGTTGCCATTACCCAT  
TGACAATTAA

>BEL24102022\_H1N1\_NA\_6

ATGAATCCAAACCAAAGATAATAACCATTGGTCTATTTGTATGACAAATGGAAACGGCTAACTTAATAT  
TACAAATTGGAAACATAATCTCAATATGGGTTAGCCACTCAATTCAAATGGAAATCAAAGCCAGATTGA  
AACATGCGATAAAAGCGTCATTACTTATGAAAACAACACTTGGGTAATCAGACATTGTTAACATCAGC  
AACACTAACTCTGCTGTAGACAGTCAGTGGCTCCGTGAAATTAGCGGGCAATTCCTCTCTGCCCTG  
TTAGTGGATGGGCTATATACAGTAAAGACAACAGTGTAAAGAAATCGTTCAAGGGGATGTGTTTGCAT  
AAGGGAACCATTCATATCATGCTCTCCCTTGGAAATGCAGAACCTTCTTCTTGACTCAAGGGGCTTGCTA  
AATGACAAACATTCCAATGGAACAATAAAGACAGAAGCCCATATCGAACCTAATGAGCTGCCTATTG  
GTGAAGTTCCCTCTCCATACAACCTAAGATTTGAGTCAGTCGCTTGGTCAGCAAGTGCTGTGCATGATGG  
CACCAATTGGCTAACAAATGGAATTTCTGGCCAGACAGTGGGGCAGTGGCTGTGTTAAAATACAATGGC  
ATAATAACAGACACTATCAAGAGTTGGAGGAACAAGATATTGAGAACAAGAGCTGAATGTGCATGTG  
TAAATGGTTCTTGTCTTACCATAATGACCGATGGACCAAGTGTGACAGGCCCTCATACAAAATCTTCAG  
AATAGAGAAGGAAAAGATAATCAAATCAGTCGAAATGAAGGCCCTAATTACTATGAAGAATGCTCC  
TGTTACCCTGATTCTAGTGAAATCACATGTGTGTGCAGGGATAATGGCATGGCTCGAATCGACCTTGGG  
TGTCTTTCAACCAGAATCTGGAATATCAGATGGGATACATATGCAGTGGGGTTTTTCGGAGACAATCCACG  
CCCTAATGATAAGACAGGCAGTTGTGGTCCAGTATCGTCTAATGGAGCAAATGGGGTAAAAGGATTTTCA  
TTCAAATACGGCAATGGTGTGGATAGGGAGAACTAAGAGCATTAGTTCAAGAAAAGTTTTGAGATGA  
TTTGGGATCCGAATGGATGGACTGGGACTGACAATAAATCTCAAAAAAGCAAGATATTGTAGGGATAAA  
TGAGTGGTCAGGGTATAGCGGGAGTTTTGTTCCAGCATCCAGAACTAACAGGGCTGAATTGTATAAGACCT  
TGCTTCTGGGTTGAACATAAAGAGGACGCCCGAAGAGAACACGATCTGGACTAGCGGGAGCAGCATAT  
CCTTTTGTGGTGTAGACAGTGACATTATGGGTTGGTCTTGGCCAGACGGTGCTGAGTTGCCATTCAACAT  
TGACAATTAA

>NC\_026431.1 Influenza A virus (A/California/07/2009(H1N1)) segment 7 matrix protein 2 (M2) and matrix protein 1 (M1) genes, complete cds

ATGAGTCTTCTAACCGAGGTCGAAACGTACGTTCTTTCTATCATCCCGTCAGGCCCCCTCAAAGCCGAGA  
TCGCGCAGAGACTGGAAAGTGTCTTTCAGGAAAGAACACAGATCTTGAAGGCTCTCATGGAATGGCTAAA  
GACAAGACCAATCTTGTCACTCTGACTAAGGGAATTTTAGGATTTGTGTTACAGCTCACCGTGCCAGT  
GAGCGAGGACTGCAGCGTAGACGCTTTGTCCAAATGCCCTAAATGGGAATGGGGACCCGAACAACATGG  
ATAGAGCAGTTAAACTATACAAGAAGCTCAAAAGAGAATAACGTTCCATGGGGCCAAGGAGGTCTACT  
AAGCTATTCAACTGGTGCACCTTGCCAGTTGCATGGGCCTCATATACAACAGGATGGGAACAGTGACCACA  
GAAGCTGCTTTTGGTCTAGTGTGTGCCACTTGTGAACAGATTGCTGATTACAGCATCGGTCTCACAGAC  
AGATGGCTACTACCACAATCCACTAATCAGGCATGAAAACAGAAATGTTGCTGGCTAGCACTACGGCAAA  
GGCTATGGAACAGATGGCTGGATCGAGTGAACAGGCAGCGGAGGCCATGGAGGTTGCTAATCAGACTAGG  
CAGATGGTACATGCAATGAGAATTTGGGACTCATCTAGCTCCAGTGTGGTCTGAAAGATGACCTTC  
TTGAAAATTTGCAGGCTACCAGAAAGCAATGGGAGTGCAGATGCAGCGATTCAAGTATCCTCTCGTCA  
TTGCAGCAAATATCATTGGGATCTTGACCTGATATTGTGGATTACTGATCGTCTTTTTTCAAATGTAT  
TTATCGTCGCTTAAATACGGTTTTGAAAAGAGGGCCTTCTACGGAAGGAGTGCTGAGTCCATGAGGGAA

GAATATCAACAGGAACAGCAGAGTGTCTGGATGTTGACGATGGTCATTTGTCAACATAGAGCTAGAGT  
AA

>MF575114.1 Influenza A virus (A/black-headed gull/Netherlands/31/2014(H13N6)) segment 7 matrix protein 2 (M2) and matrix protein 1 (M1) genes, complete cds

AGCAAAAAGCAGGTAGATATTGAAAGATGAGTCTTCTAACCGAGGTCGAAACGTATGTTCTCTATCATC  
CCGTCAGGCCCCCTCAAAGCCGAGATAGCACAGAACTTGAAGATGTTTTTGCAGGGAAGAACACAGATC  
TGGAGGCTCTTATGGAGTGGTTAAAGACAAGACCAATCTTGCACCTCTGACTAAGGGGATTTAGGATT  
TGTGTTTACGCTCACCGTGCCAGTGAGCGAGGACTGCAGCGTAGACGCTTTGTCCAAAACGCCCTAAAT  
GGGAATGGAGACCCGAACAACATGGATAGAGCAGTCAAGCTTTATCGAAAGCTGAAAAGAGAGATAACAT  
TCCATGGAGCTAAAGAGGTGGCACTTAGCTACTCAACTGGTGGCCTTGCCAGCTGCATGGGTCTCATTTA  
CAACAGAATGGGTACAGTGACCACAGAAGTGGCTTTTGGTCTTGTTGTGTCCTTGCGAGCAGATTGCT  
GACTCCAGCACAGGTCTCACAGACAAATGGTAACCACAACCAATCCACTGATCAGGCATGAGAACAGAA  
TGGTGTGGCAAGCACTACTGCCAAGGCTATGGAGCAGATGGCTGGATCAAGTGAACAAGCAGCTGAGGC  
CATGGAGGTTGCTGGTCAGGCCAGACAGATGGTGCAGGCAATGAGAACAATTGGGACTCATCTAGCTCC  
AGTGTGGTCTAAAAGATGATCTTCTGAAAACCTTGCCAGGCTATCAGAAGCGGATGGGAGTGCAAATGC  
AGCGATTCAAGTGACCTCTCGTCATTGCGGCGAGTGTATTGGGATCTTGCACTTGATACTGTGGATTTC  
TTGATCGCCTTTTCTCAAATGCATTTATCGTCGCATTAATACGAGTTGAAAAGAGGGCCTTCTACGGA  
AGGAGTGCCTGAGTCTATGAGGGAAGAGTATCGGCAGGAGCAGCAGAGTGTGGATGTTGACGATGGT  
CATTTTGTCAACATAGAGCTGGAGTAAAAAACTACCTTGTCTACT

>iavh1n11922|A/Mute\_Swan/Netherlands/2/2022|EPI\_ISL\_15364797|A/Mute\_Swan/Netherlands/2/2022|MP|7||A/Mute\_Swan/Netherlands/2/2022

TATTGAAAGATGAGTCTTCTAACCGAGGTCGAAACGTACGTTCTCTATCGTCCCGTCGGGCCCCCTCA  
AAGCCGAGATCGCGCAGAGACTTGAAGATGTCTTTCAGGGAAGAACACCGATCTTGAGGCTCATGGA  
ATGGCTAAAGACAAGACCAATCCTGTACCTATGACTAAGGGGATTTGGGATTTGTGTTACGCTCACC  
GTGCCAGTGAGCGAGGACTGCAGCGTAGACGCTTTGTCCAAAATGCTCTAAATGGAATGGAGACCCAA  
ACAACATGGACAGGGCAGTCAAACCTGTACAAGAAATGAAGAGAGAGATAACATTCATGGGGCTAAAGA  
AGTTGCACTCAGTTACTCAACCGGTGCCTTGCCAGTTGTATGGGTCTCATATACAAGGATGGGGACG  
GTGACCGCAGAAGTGGCATTGGGCTAGTGTGCCACCTGTGAGCAGATTGCTGATTACAGCATCGGT  
CTCACAGGCAGATAGCCACCACCACCACTAATCAGACATGAAAACAGAATGGTGTGGCCAGTAC  
CACAGCTAAGGCTATGGAGCAGATGGCTGGATCGAGTGAGCAAGCAGCGGAAGCCATGGAGGTTGCTAGT  
CAGGCTAGGCAAATGGTGCAGGCGATGAGGACCATTGGAATCATCTAGCTCCAGTGCCGGTCTGAGAG  
ATGATCTCCTGAAAATTGTCAGGCTACCAAAAACGGATGGGAGTGCAACTGCAGCGATTCAAGTGATC  
CTCTCGTTATTGCCCAAGTATCATTGGGATCTTGCACTTGATATTGTGGATTCTTGATCGCCTTTTCTT  
CAAATGCGTTTATCGTCGCCTTAAATACGTTTGAAGAAGGGCCTTCTACGGAAGGAGTACCTGAGTCC  
ATGAGGGAAGAGTACCGGCAGGAACAGCAGAGTGTGTGGATGTTGACGATGGTCATTTTGTCAACATAG  
AGCTGGAGTAAAAAACTA

>iavh1n11922|A/Barry/3792/2022|EPI\_ISL\_15391170|A/Barry/3792/2022|MP|7||A/Barry/3792/2022

AGCAAAAAGCAGGTAGATATTGAAAGATGAGCCTTCTAACCGAGGTCGAAACGTATGTTCTCTATCGTT  
CCATCAGGCCCCCTCAAAGCCGAGATCGCGCAGAGACTTGAAGATGTCTTGTGTTGGGAAAAACACAGATC  
TTGAGGCTCTCATGGAATGTAAAGACAAGACCAATCTGTACCTTTGACTAAGGGGATTTAGGGTT  
TGTTTTACGCTCACCGTGCCAGTGAGCGAGGACTGCAGCGTAGACGCTTTGTCCAAAATGCCCTCAAT  
GGGAATGGAGACCCAAATAACATGGACAAGCAGTTAAACTGTATAGAAAATTAAGAGGGAGATAACGT  
TCCACGGGGCCAAAGAAATAGCTCTCAGTTATCTGCTGGTGCATTTGCCAGTTGCATGGGCCATATA  
CAATAGGATGGGGGCTGTAACCACTGAAGTGGCATTGGCCTGGTGTGTGCAACATGTGAGCAGATTGCT  
GATTTCCAGCACAGGTCTCATAGGCAGATGGTGGCAACAACCAATCCATTAATAAAACATGAGAACAGAA  
TGGTTTTGGCCAGCACTACAGCTAAGGCTATGAGCAAATGGCTGGCTCAAGTGAGCAAGCAGCAGAGGC  
CATGGAGATTGCTAGTCAGGCCAGGAGATGGTGCAGGCAATGAGAGCCATTGGGACTCATCTAGTTCC  
AGCACTGGTCTAAGAGATGATCTTCTGAAAATTGTCAGACCTATCAGAAACGAATGGGGGTGCAGATGC

AACGATTCAAGTAACCCACTTGTGTTGCCGGAATATCATTGGGATCTTGCACTTGATATTATGGATTC  
TTGATCGTCTTTTTTCAAATGCGTCTATCAACTCTCAAACACGGCCCTTAAAAGAGGCCCTTACGGA  
AGGTGTGCCTGAGTCTATGAGGGAAGAATACCGAAAGAACAGCAGAATGCTGTGGATGCTGACGAAAAGT  
CATTTTGCAGCATAGAATTGGAGTAAAAAACTACCTTGTCTACT

>BEL10102022\_H1N1\_M\_7

ATGAGTCTTCTAACCGAGGTCGAAACGTACGTTCTTTCTATCATCCCGTCAGGCCCTCAAAGCCGAGA  
TCGCACAGAGACTGGAAGTGTCTTTGCAGGAAAGAACACAGATCTTGAGGCTATCATGGAATGGCTAAA  
AAACAAGACCAATCTTGCACCTCTGACTAAGGGAATTTAGGATTTGTGTTACGCTCACCGTGCCAGT  
GAGCGAGGACTGCAGCGTAGACGCTTTATCCAAAATGCCCTAAATGGAATGGGGACCCGAACAACATGG  
ATAGAGCAGTTAGACTATACAAGAACTCAAAGAGAAATAACGTTCCATGGGGCCAAAGAAGTGTACT  
AAGCTATTCAACTGGTGCACCTTGCAAGTTGCATGGCCCTCATATACAACAGGATGGAAACAGTGACCACA  
GAAGCTGCTTTTGGTCTAGTTTGTGGCACTTGTAACAGATTGCTGATTACAGCATCGGTCTCACAGAC  
AAATGGCTACTACCACAAATCCACTAATCAGGCATGAAAACAGAATGGTGTGGCTAGCACTACGGCAAA  
GGCTATGGAACAGTGGCTGGATCGAGTGAACAGGCAGCGGAGGCCATGGAGTTGCTAATAAGACTAGG  
CAGATGGTACAAGCAATGAGAATATTGGAACCTATCCTAGCTCCAGTGTGGTCTAAGAGATGACCTTC  
TTGAAAATTTACAGGCCTACCAGAAGCGAATGGGAGTGCAGATGCAGCGGTTCAAATGATCCTCTCGTCA  
TTGCAGCAAACATCATTGGGATCTTGACCTGATATTGTGGATTACTGATTGTCTTTTTTCAAATGCAT  
TTATCGTCGCTTTAAATACGGTTTGAAGAGGGCCCTTACGGAAGGAGTGCCTGAGTCCATGAGGGAA  
GAATATCAACAGGAGCAGCAGAGTGTCTGGATGTTGACGATGGTCATTTGTCAACATAGAGCTAGAGT  
AA

>BEL31102022\_H1N1\_M\_7

ATGAGTCTTCTAACCGAGGTCGAAACGTACGTTCTTTCTATCATCCCGTCAGGCCCTCAAAGCCGAGA  
TCGCACAGAGACTGGAAGTGTCTTTGCAGGAAAGAACACAGATCTTGAGGCTATCATGGAATGGCTAAA  
GACAAGACCAATCTTGCACCTCTGACTAAGGGAATTTAGGATTTGTGTTACGCTCACCGTGCCAGT  
GAGCGAGGACTGCAGCGTAGACGCTTTATCCAAAATGCCCTAAATGGAATGGGGACCCGAACAACATGG  
ATAGAGCAGTTAGACTATACAAGAACTCAAAGAGAAATAACGTTCCATGGGGCCAAAGAAGTGTACT  
AAGCTATTCAACTGGTGCACCTTGCAAGTTGCATGGCCCTCATATACAACAGGATGGAAACAGTGACCACA  
GAAGCTGCTTTTGGTCTAGTTTGTGCCACTTGTAACAGATTGCTGATTACAGCATCGGTCTCACAGAC  
AAATGGCTACTACCACAAATCCACTAATCAGGCATGAAAACAGAATGGTGTGGCTAGCACTACGGCAAA  
GGCTATGGAACAGTGGCTGGATCGAGTGAACAGGCAGCGGAGGCCATGGAGTTGCTAATAAGACTAGG  
CAGATGGTACATGCAATGAGAATATTGGAACCTATCCTAGCTCCAGTGTGGTCTAAAAGATGACCTTC  
TTGAAAATTTACAGGCCTACCAGAAGCGAATGGGAGTGCAGATGCAGCGGTTCAAATGATCCTCTCGTCA  
TTGCAGCAAACATCATTGGGATCTTGACCTGATATTGTGGATTACTGATCGTCTTTTTTCAAATGCAT  
TTATCGTCGCTTTAAATACGGTTTGAAGAGGGCCCTTACGGAAGGAGTGCCTGAGTCCATGAGGGAA  
GAATATCAACAGGAGCAGCAGAGTGTCTGGATGTTGACGATGGTCATTTGTCAACATAGAGCTAGAGT  
AA

>NDN10092022\_H13N6\_M\_7

AGCAAAGCAGGTAGATATTGAAAGATGAGCCTTCTAACCGAGGTCGAAACGTATGTTCTCTATCATC  
CCATCAGGCCCTCAAAGCCGAGATAGCACAGAGACTTGAAGATGTTTTGCAGGGAAGAACACAGACC  
TTGAAGCTCTCATGGAGTGGCTAAAGACAAGACCGATCTTGTACCTCTGACTAAGGGGATTTGGGATT  
TATTTTACGCTCACCGTGCCAGTGTAGCGAGGACTGCAGCGTAGACGCTTTGTCCAAAACGCCCTAAAT  
GGGAATGGAGACCCGAACAACATGGACAGGGCAGTGAAGCTTTACAGAAAGCTGAAGAGGGAGATAACAT  
TCCATGGAGCTAAGGAGGTGGCACTCAGTTACTCGACTGGTGCCTTCCAGCTGCATGGGTCTCATCTA  
CAATAGGATGGGGACAGTAACACAGAAAGTGGCTTTTGGTCTAGTATGTCCCACTGTGAGCAGATTGCT  
GACTCTCAGCACCGATCCCACAGACAGATGGTACTACAACCAACCACTAATCAGACATGAAAATAGAA  
TGGTGTCTGCAAGCACTACAGCCAAAGCTATGGAGCAGATGGCTGGATCGAGTGAACAAGCAGCAGAGGC

AATGGAGGTTGCAGGTCAGGCTAGACAGATGGTGCAGGCAATGAGAACAATTGGGACCCATCCTAGCTCC  
AGTGCTGGTCTGAAAGATGATCTTCTTGGAAAATTTACAGGCCTATCAGAAAACGAATGGGAGTGCAAATGC  
AGCGATTCAAGTGATCCTCTCGTTATTGTCAGCAAGTATCATTGGGATCTTGCACTTGATATTGTGGATT  
TTGATCGTATTTCTCAAATGCATTATCGTCGCATTAAATACGAGTTGAAAAGAGGGCCTTCTACGGA  
AGGAGTGCCTGAGTCTATGAGGGAAGAATATCGACAGGAACAGCAGAATGCTGTGGATGTTGACGATAGT  
CATTTTGTCAACATAGAGCTGGAGTAAAAAACTACCTTGTCTACT

>NC\_026432.1 Influenza A virus (A/California/07/2009(H1N1)) segment 8 nuclear export protein (NEP) and nonstructural protein 1 (NS1) genes, complete cds

ATGGACTCCAACACCATGTCAGCTTTCAGGTAGACTGTTTCCTTTGGCATATCCGCAAGCGATTGCAAG  
ACAATGGATTGGGTGATGCCCATTCCTTGATCGGCTCCGCCGAGATCAAAAGTCCTTAAAAGGAAGAGG  
CAACACCCTTGGCCTCGATATCGAAAACAGCCACTCTGTTGGGAAACAATCGTGAATGGATCTTAAAA  
GAGGAATCCAGCGAGACACTTGAATGACAATTGCATCTGTACTACTTCGCGCTACCTTCTGACATGA  
CCCTCGAGGAAATGTCACGAGACTGGTTCATGCTCATGCCTAGGCCAAAAGATAATAGGCCCTCTTTGCGT  
GCGATTGGACCAGGCGATCATGAAAAGAACATAGTACTGAAAAGCGAACTTCAGTGTAACTTTAACCGA  
TTAGAGACCTTGATACTACTAAGGGCTTTCAGTGAAGGAGGAGCAATAGTTGGAGAAAATTCACCATTAC  
CTTCTCTCCAGGACATACTTATGAGGATGTCAAAAATGCAGTTGGGTCCTCATCGGAGGACTTGAATG  
GAATGGTAACACGGTTCGAGTCTCTGAAAATATACAGAGATTGCTTGGAGAAAAGTGTGATGAGAATGGG  
AGACCTTACTACTCCAGAGCAGAAAATGAAAAGTGCGGAGAGCAATGGGACAGAAAATTTGAGGAAAATA  
AGGTGGTAAATGAAGAAATGCGGCACAGATTGAAAGCGACAGAGAATAGTTTCGAACAAAATAACATTA  
TGCAAGCCTTACAACACTAGCTTGAAGTAGAACCAAGAGATAAGAGCTTTCGTTTCAGCTTATTTAATG  
ATAAAAAACACCTTGTCTACT

>MF575318.1 Influenza A virus (A/black-headed gull/Netherlands/31/2014(H13N6)) segment 8 nuclear export protein (NEP) and nonstructural protein 1 (NS1) genes, complete cds

AGCAAAGCAGGGTGACAAAAACATAATGGATTCAAACACTGTATCAAGCTTTCAGGTAGATTGCTTTCT  
TTGGCATGTCGCCAAACGATTTGCAGACCAAGAGATGGGTGATGCCCATTCCTTGACCCGGCTTCGCCGA  
GATCAGAAGTCTTTAAAGGGGAGGAGCAGCACTCTTGAATGGATATTGAGGCGGCTACATGCGCTGGGA  
AGCGAATAATTGAGAGGATTCTAAAAGAAGAATCCAATGAGGCATTAAGATGAATATTGCCTCAACGCC  
TGCCTCAGCTACATGACTGACTGACTCCAGAGGAGATGTCAAAAAGAAATGGTTCATGCTCATGCCAAAA  
CAGAAAATTTGCTGGGCCTCTCCGCATCAGAAATGGATCAGGCGATCAGATAAAAGAAATCACACTGAAAG  
CGAATTCAGTGTAAATTTTGACCGGCTGGAGACTCTCGTACTGTTAAGGGCTTTTACCAATGATGGGGC  
TATTGTTGGTAAATCTACCATTTCTCTTCCAGGACATACTAACAGGATGTCAAAAATGCAATT  
GGAGTCTCATCGGTGACTTGAGTGAATGATAACACAGTTTCAATCTTCAAAAATTTACAAGATTTCG  
CTTGGGGAAGCAGTGATGAGGATGGGCGACCTCCACTCACTTCAAAGCAGGAACAAAACTGGCGGAGAAC  
AATTGGGTCAGAAGTTTGAAGAAAATAAGGTGGTTGATTGAGGAGTGAGACACAAATTAAGACAAACAGA  
AAACAGTTTTGAACAAATAACATTCATGCAAGCCTTACAACCTTGAAGTGGAGCAAGAGATAAAG  
ACTTCTCGTTTCAGCTTATTTAATGATAAAAAACACCTTGTCTACT

>iavh1n11922|A/Mute\_Swan/Netherlands/2/2022|EPI\_ISL\_15364797|A/Mute\_Swan/Netherlands/2/2022|NS|8||A/Mute\_Swan/Netherlands/2/2022

GACAAAAACATAATGGATTCCAACACTGTGTCAAGCTTTCAGGTAGATTGCTTCTTTGGCATGTCGCCA  
AACGATTTGCAGACCAAGAAGTGGGTGATGCCCATTCCTTGACCCGGCTTCGCCGAGATCAGAAATCCCT  
GAGAGGAAGAGGCGCACTCTTGGTCTGGACATCGAAACAGCCACCCGTGCGGGAAGCAGATAGTGGAG  
CTGATTCTGAAAAGAAGTCTGATGAGGCGCTTAAAATGACTATTGCCCCGTCGCCAGCTTCACGCTACC  
TAACTGACATGACTCTTGAGGAGATGTCAAGAGACTGGTTCATGCTCATGCCAAAACAGAAAGTGGCAGG  
TTCCCTTTGCATCAGAATGGACCAGGCAATAATGGATAAAACCATCATATTGAAAGCAAACCTTCAGTGTG  
ATTTTTGACCGGCTGAAAACCTAATACTAATAGAGCTTTCACAGAAGAAGGAGCAATTGTGGGAGAAA  
TCTCACCATTACCTTCTTCCAGGACATACTAATGAGGATGTCAAAAATGCAATTGGGTCCTCATCGG  
AGGACTTGAATGGAATAATAACACAGTTTCGAGTCTCTGAAAACCTCAGAGATTGCTTGGAGAAAGCAGT  
AATGAGAATGGGAGATCTCCACTCCCTCAAAGCAGAAAACGAAAATGGCGAGGACAATTGAGTCAGAAG  
TTTGAAGAAAATAAGATGGCTGATTGAAGAAGTGCAGCACAGATTGAAGATTACAGAGAACAGTTTCAAG

AGATAACTTTCATGCAAGCCTTACAACCTATTGCTTGAAGTGGAGCAAGAGATAAGAACCTTCTCGTTTCA  
GCTTATTTAATGATAAAAAACAC  
>iavh1n11922|A/Barry/3792/2022|EPI\_ISL\_15391170|A/Barry/3792/2022|NS|8||A/Barry/3792/2022  
GATCAGCAAAAAGCAGGGTGACAAAACATAATGGATTCCAACACTGTGTCAAGTTCCAGGTAGATTGCT  
TTCTTTGGCATATCCGGAACAAGTTGTGGACCAAAAAGTGTGATGCCCCATTCTCGATCGGCTTCG  
CCGAGATCAGAGGTCCCTAAGGGGAAGAGGCAATACTCTCGGTCTAGACATCAAATCAGCCACCCATGTT  
GGAAAGCAAATCGTAGAAAAGATTCTGAAAGGAGAATCTGATGAGGCACTTAAAATGACCATGGTCTCAA  
CACCTGCTTCGCGATACATAACTGACATGACTATTGAGGAATTGTCAAGAACTGGTTTCATGCTAATGCC  
CAAGCAGAAGGTGGAAGGACCTCTTTCATCAGAATGGACCAGGCAATCACGGAGAAAAACATCATGTTA  
AAAGCGAATTTCAATGTGATTTTGGCCGGCTAGAGACCATAGTATTGCTAAGAGCTTTCACCGAAGAGG  
GAGCAATTGTTGGCGAAATCTCACCATTGCCTCTTTCCAGGACATACTATTGAGGATGTCAAAAATGC  
AATTGGGTCTCATCGGAGGACTTGAATGGAATGATAACACAGTTCCAGTCTCTAAAAATCTACAGAGA  
TTTCGCTGGAGAAGCAGTCTAGAGAAATGGGGGACCTCCACTTACTCCAAAACAGAAAACGGGAAATGGCGA  
GAACAGCTAGGTGAGAAGTTTGAAGAGATAAGATGGCTGATTGAAGAGGTGAGACACAGATTAAGAACAA  
CTGAAAATAGCTTTGAACAATAACATTCATGCAAGCATTACAACCTACTGTTTGAAGTGAACAGGAGAT  
AAGAACCTTCTCATTTACAGCTTATTTAATGATAAAAAACACCCCTTGTCTTACTGATC  
>BEL12092022\_H13N6\_NS\_8  
AGCAAAAAGCAGGGTGACAAAAACATAATGGATTCAAACTGTATCAAGCTTTCAGGTAGATTGCTTTCT  
TTGGCATGTCCGCAAACGATTTGCAGACCAAGAGATGGGTGATGCCCCATTCTTGACCGGCTTCGCCGA  
GATCAGAAGTCTTTAAAGGGGAGGAGCAGCACTCTTGAATGGACATTGAGGCGGCTACATGCGCTGGGA  
AGCGGATAATTGAGCGGATTCTAAAAGAAGAATCCAATGAGGCATTAAAGATGAATATTGCCTCAACGCC  
TGCCTCACGCTACATGACTGACATGACTCCAGAGGAGATGTCAAAAAGATGGTTTCATGCTCATGCCAAA  
CAGAAATTTGCTGGGCCTCTCCGCATCAGAATGGATCAGGCAATCATAGATAAAGAAATCACACTGAAAG  
CGAATTTAGTGTAAATTTGACCGGTTGGAGACTCTCGTGTGTTAAGGGCTTTTACCAATGATGGGGC  
TATTGTTGGTGAATCTCACCATTGCCTTCTTCCAGGACATACTAACGAGGATGTCAAAAATGCAATT  
GGAGTCTCATCGGTGGACTTGAGTGAATGATAACACAGTTCGAATCTCTGAAAATTTACAGAGATTGCG  
CTTGGGGAAGCAGTGTAGAGAAATGGAGACCTCCATTCACTTCAAAGCAGGAACAAAACTGGCGAGAAC  
AATTGGGTGAGAAGTTTGAAGAAATAAGGTGGTTGATTGAGGAAGTGAACACAAATTAAGACAAACAGA  
AAACAGTTTGAACAATAACATTCATGCAAGCCTTACAACCTGTTGCTTGAAGTGGAGCAAGAGATAAGG  
ACTTCTCGTTTCAGCTTATTTAATGATAAAAAACACCCCTTGTCTTACT  
>CRG12092022\_H13N6\_NS\_8  
AGCAAAAAGCAGGGTGACAAAAACATAATGGATTCAAACTGTATCAAGCTTTCAGGTAGATTGCTTTCT  
TTGGCATGTCCGCAAACGATTTGCAGACCAAGAGATGGGTGATGCCCCATTCTTGACCGGCTTCGCCGA  
GATCAGAAGTCTTTAAAGGGGAGGAGCAGCACTCTTGAATGGACATTGAGGCGGCTACATGCGCTGGGA  
AGCGGATAATTGAGCGGATTCTAAAAGAAGAATCCAATGAGGCATTAAAGATGAATATTGCCTCAACGCC  
TGCCTCACGCTACATGACTGACATGACTCCAGAGGAGATGTCAAAAAGATGGTTTCATGCTCATGCCAAA  
CAGAAATTTGCTGGGCCTCTCCGCATCAGAATGGATCAGGCAATCATAGATAAAGAAATCACACTGAAAG  
CGAATTTAGTGTAAATTTGACCGGTTGGAGACTCTCGTGTGTTAAGGGCTTTTACCAATGATGGGGC  
TATTGTTGGTGAATCTCACCATTGCCTTCTTCCAGGACATACTAACGAGGATGTCAAAAATGCAATT  
GGAGTCTCATCGGTGGACTTGAGTGAATGATAACACAGTTCGAATCTCTGAAAATTTACAGAGATTGCG  
CTTGGGGAAGCAGTGTAGAGATGGGAGACCTCCATTCACTTCAAAGCAGGAACAAAACTGGCGAGAAC  
AATTGGGTGAGAAGTTTGAAGAAATAAGGTGGTTGATTGAGGAAGTGAACACAAATTAAGACAAACAGA  
AAACAGTTTGAACAATAACATTCATGCAAGCCTTACAACCTGTTGCTTGAAGTGGAGCAAGAGATAAGG  
ACTTCTCGTTTCAGCTTATTTAATGATAAAAAACACCCCTTGTCTTACT  
>NDN12092022\_H13N6\_NS\_8  
AGCAAAAAGCAGGGTGACAAAAACATAATGGATTCAAACTGTATCAAGCTTTCAGGTAGATTGCTTTCT

TTGGCATGTCCGCAAACGATTTGCAGACCAAGAGATGGGTGATGCCCATTCCTTGACCGGCTTCGCCGA  
GATCAGAAGTCTTTAAAGGGGAGGAGCAGCACTCTTGAATGGACATTGAGCGGGCTACATGCGCTGGGA  
AGCGGATAATTGAGCGGATTCTAAAAGAAGAATCCAATGAGGCATTAAGATGAATATTGCCTCAACGCC  
TGCCCTCAGCTACATGACTGACATGACTCCAGAGGAGATGTCAAAGAATGGTTCATGCTCATGCCAAAA  
CAGAAATTTGCTGGGCCTCTCCGCATCAGAATGGATCAGGCAATCATAGATAAAGAAATCACACTGAAAG  
CGAATTCAGTGAATTTTTGACCGGTTGGAGACTCTCGTGTGTTAAGGGCTTTACCAATGATGGGGC  
TATTGTTGGTAAATCTACCATTGCCTTCTCTCCAGGACATACTAACGAGGATGTCAAAAATGCAATT  
GGAGTCTCATCGGTGACTTGAGTGAATGATAACACAGTTCGAATCTCTGAAAAATTTACAGAGATTG  
CTTGGGGAAGCAGTGATGAGAATGGGAGACCTCCATTCACTTCAAAGCAGGAACAAAACTGGCGAGAAC  
AATTGGGTCAGAAGTTTGAAGAAATAAGGTGGTTGATTGAGGAAGTGAGACACAAATTGAAGACAACAGA  
AAACAGTTTGAACAAATAACATTATGCAAGCCTTACAACCTGTTGCTGAAGTGGAGCAAGAGATAAGG  
ACTTCTCGTTTCAGCTTATTTAATGATAAAAAACACCCTTGTTTCTACT  
>BEL10102022\_H13N6\_NS\_8  
AGCAAAAGCAGGGTGACAAAAACATAATGGATTCAAACACTGTGTCAAGCTTTCAGGTAGACTGCTTCT  
TTGGCATGTCCGCAAACGATTTGCAGACCAAGATATGGGTGATGCCCATTCCTAGATCGGCTTCGCCGA  
GACCAAAAGTCCCTAAAGGGGAGAAGCAGCACTCTTGGTATCGACATTGAGGCAGCTACTTGCTCTGGGA  
AGCAGATAATAGAGCGGATTCTGGGTGAAGAATCAGACGAGGCACTAAAAATGACCATTGCCTCTGTGCC  
TGCATCCCGCTATATAACTGACATGACCCTGAAGAAATGTCAAGGGACTGGTTTATGCTTATGCCCAAG  
CAGAAGTTTGTGGGCCTCTGTCATCAAAATGGATCAGGCAATCATAGACAAAGACATCACACTGAAGG  
CAAATTTAGTATAATTTAACCGATTGGAACTCTCGTGTGCTGAGGGCTTTACCAATGAGGGGGC  
AATAGTGGGCGAAATTTACAATTGCCTTCTCTCCAGGACATACTAGCGAGGATGTCAAAAATGCAATT  
GGAGTCTCATCGGGGACTTGAATGGAATGATAATACAGTTCGAATCTCTGAAAAATCTACAGAGATTG  
CTTGGGGAAGCAGTAATGAGAATGGGAGACCTCCATTCACTCCAGAGCAGAAACAGAACTGGCGAGAAC  
AATTGAGTCAGAAGTTTGAAGAAATGAGATGGTTGATTGAAGAAGTGAGACACAAATTGAAGACAACAGA  
GAGTAGTTTGAACAAATAACATTATGCAAGCATTACAACCTATTGCTTGAAGTGGAGCAAGAGATAAGG  
ACTTCTCGTTTCAGCTTATTTAATGATAAAAAACACCCTTGTTTCTACT

#### Human H1N1 segment 4 and 6 sequences

>BYM28112022\_H1N1\_HA\_4

ATGAAGGAATACTAGTAGTTATGCTGTATACATTTACAACCGCAAATGCAGACACATTATGTATAGGTT  
ATCATGCGAACCAATTCAACAGACACTGTGGACACAGTACTAGAAAAGAATGTAACAGTAACACACTCTGT  
CAATCTTCTAGAAGACAAGCATAACGGAAAACCTATGCAAATAAGAGGGGTAGCCCATTCATTTGGGT  
CAATGTAACATTGCTGGCTGGATCTTGGGAAATCCAGAGTGTGAATCACTCTCCACAGCAAGATCATGGT  
CCTACATTGTGGAAACATCTAATTCAGACAATGGAACGTGTACCCAGGAGATTCATCAATTATGAGGA  
GCTAAGAGAGCAATTGAGCTCAGTGTATCATTTGAAAGGTTTGAATATCCCAAGACAAGTTCATGG  
CCTAATCATGACTCGGACAATGGTGTAAACGGCAGCATGTTCTCACGCTGGAGCAAGAAGCTTACAAAA  
ACTTGATATGGCTGGTTAAAAAGGAAAATCGTACCCAAAGATCAACCAAACCTACATTAATGATAAAGG  
GAAAGAAGTCTCGTGTGTGGGGCATTACCATCCACCCACTATTACTGACCAAGAAAAGTCTCTATCAG  
AATGCAGATGCATATGTTTTGTGGGGACATCAAGATACAGCAAGAAGTTCAAGCCGAAAATAGCAGCAA  
GACCCAAAGTGAGGGNTCNAGCAGGGAGAATGAACTATTACTGGACACTAGTAGAACCGGGAGACAAAAT  
AACATTCGAAGCAACTGGTAATCTAGTGGCACCGAGGTATGCATTCACAATGAAAAAAAAGCTGGATCT  
GGTATTATCATTTCAGATACACCAAGTCCACGATTGCAATGCAACTTGTGAGACACCCGAGGGTGTATAA  
ACACCAGCCTCCCATTTCAAATGTACATCCGATCACGATTGGGAAATGTCAAAGTATGTAAGAAGCAC  
AAAATTGAGACTGGCCACAGGATTGAGGAATGTCCCGTCTATTCAATCTAGAGCCATTCGGGGCCATT  
GCTGGCTTCATCGAAGGGGGTGGACAGGGATGGTAGATGGATGGTACGGTTATCACCATCAAATGATC  
AGGGATCAGGATATGCAGCCGATCTGAAGAGCACACAAAATGCCATTGATAAGATTACCAACAAAGTAA  
CTCTGTTATTGAAAAGATGAATACACAGTTCACAGCAGTTGGTAAAGAGTTCAACCACCTTGAAAAAGA  
ATAGAGAATCTAAATAAAAAGGTTGATGATGTTTTCTGGACGTTTGGACTTACAATGCCGAACTGCTGG  
TTCTACTGGAAAATGAAAGAAGTTGGACTATCACGATTCAAATGTGAAGAAGTTGATGAAAAAGTAAG  
ACACCAATTAACAAATGCAAGGAAATGGAACCGCTGTTGAATTTACACAAATGCGACAAC  
ACATGCATGGAAAGTCAAGAATGGGACTTATGACTACCCAAAATACTCAGAGGAAGCAAAATTAACA  
GAGAAAAATAGATGGAGTAAAGCTGGACTCAACAAGGATTTACCAGATTTTGGCAATCTATTCAACTGT  
TGCCAGTTCAATGGTACTGGTAGTCTCCCTGGGGCAATCAGCTTCTGGATGTGCTCAAATGGGTCTTA  
CAGTGTAAGATATGATTTAA

>BEL31102022\_H3N2\_HA\_4

AGCAAAAGCAGGGGATAATTCTATTAACCATGAAGGCTATCATTGCTTTGAGCAACATTCTATGTCTTGT  
TTTTGCTCAAAAAATACCTGAAATGACAATAGCACGGCAACGCTGTGCCTTGGGCACCATGCAGTACCA  
AACGGAACGATAGTAAAAACAATCACAATGACCGAATTGAAGTTACTAATGCTACTGAGTTGGTTTCAGA  
ATTCATCAATAGTAAAAATATGCAACAGTCCCTCATCAGATCCTTGATGGAGGGAACTGCACACTAATAGA  
TGCTCTATTGGGGACCCTCAGTGTGACGGCTTTCAAATAAGGAATGGGACCTTTTTGTTGAACGAAGC  
AGAGCCAACAGCAGCTGTACCCTTATGATGTGCCGGATATGCCTCCCTTAGGTCACTAGTTGCCTCAT  
CCGGAACACTGGAGTTTAAAAATGAAAGCTTCAATTGGACCGGAGTCAAACAAAACGGAACAAGTTCTGC  
GTGCAAAAGGGGATCTAGTAGTAGTTTTTTAGTAGATTAATTTGGTTGACCAGCTTAAACAACATATAT  
CCAGCACAGAACGTGACTATGCCAAACAAGGAACAATTTGACAAATGTACATTTGGGGGTTCACCACC  
CGGATACGGACAAGAACCAATTCTCCCTGTTTGCTCAATCATCAGGAAGAATCACAGTATCTACAAAAG  
AAGCCAACAAGCTGTAATCCCAATATTGGATCTAGACCCAGAGTAAGGGATATCCCTAGCAGAATAAGC  
ATCTATTGGACAATAGTAAACCCGGGAGACATACTTTGATTAACAGCACAGGGAATCTAATTGCTCCTA  
GGGGTTACTTCAAATACGAAGTGGGAGAAGCTCAATAATGAGATCAGACGCACCCATTGGCAAATGTAA  
GTCTGAATGCATCACTCCAAATGGAAGCATTCCAATGACAAACCGTTCCAAAATGTAAACAGGATCACA  
TACGGGGCCTGTCCAGATACGTTAAGCAAAGCACCCCTGAAATTTGGCAACAGGAATGCGAAATGTACCTG  
AGAAACAAACCAGAGGCATATTTGGTGAATAGCGGGTTTCATAGAAAATGGATGGGAGGGAATGGTGGA  
TGTTGGTACGGTTTCAGGCCACAAAATCTGAGGGAAGAGGACAAGCAGCAGATCTCAAAGCACTCAA



GCAGCAATCGATCAAATCAGTGGGAAGCTGAATCGATTGATCGGAAAAACCAACGAGAAATCCATCAGA  
TTGAAAAAGAAATCTCAGAAGTAGAAGGAAGAGTTCAAGACCTCGAGAAATATGTTGAGGACACTAAAAA  
AGATCTCTGGTCATACAACGCGGAGCTTCTTGTTCCTGGGAGAACACATACGATTGACCTAACTGAC  
TCAGAAATGAACAAGCTGTTTGA AAAAACAAGAAGCAACTGAGGGAAAAATGCTGAGGATATGGGAAATG  
GTTGTTTTCAAAATATACCACAATGTGACAATGCCTGCATAGGATCAATAAGAAATGAAACTTATGACCA  
CAATGTGTACAGGGATGAAGCATTAAACAACCGTTCCAGATCAAGGGAGTTGAGCTGAAGTCAGGGTAC  
AAAGATTGGATCCTATGGATTTCTTTGCCATGTCATGTTTTTGTCTTGTATTGCTTTGTTGGGGTTCA  
TCATGTGGCCTGCCAAAAGGGCAACATTAGATGCAACATTTGCATTTGAGTGCATTAATAAAAACACC  
CTTGTCTACT

>BYM28112022\_H3N2\_HA\_4

AGCAAAGCAGGGGATAATCTATTAACCATGAAGACTATCATTGCTTTGAGCAACATTCTATGCTTGT  
TTTTGCTCAAAAAATACCTGGAATGACAATAGTACGGCAACGCTGTGCCTTGGGACCATGCAGTACCA  
AACGGAAACGATAGTGAAAACAATCACAATGACCGAATTGAAGTTACTAATGCTACTGAGTTGGTTCAGA  
ATTCATCAATAGGTGAAATATGCGGCAGTCCCTCATCAGATCCTTGATGGAGGAACTGCACACTAATAGA  
TGCTCTATTGGGGACCCTCAGTGTGACGGCTTTCAAATAAGGAATGGGACCTTTTGTGAAAGAAGC  
AGAGCCAACAGCAACTGTACCCTTATGATGTGCCGGTTATGCCTCCCTTAGTCACTAGTTGCCCTCAT  
CCGGCACACTGGAATTTAAAAATGAAAGCTTCAATTGGACCGGAGTCAAACAAAACGGAAACAAGTTCTGC  
GTGCAAAGGGGATCTAGTAGTAGTTTTTTAGTAGATTAATTTGGTTGACCAGCTTAAACAACATATAT  
CCAGCACAGAACGTGACTATGCCAAAACAGGAACAATTTGACAAATTGACATTTGGGGGGTTCAACCACC  
CGGATACAGACAAAACCAATCTCCCTGTTTGTCTCAATCATCAGGAAGAATCACAGTATCTACAAAAG  
AAGCCAACAAGCTGTAATCCCAATATCGGATCTAGACCCAGAATAAGGATATCCCTAGCAGAATAAGC  
ATCTATTGGACAATAGTAAACCGGGAGACATACTTTTGATTAACAGCACAGGGAATCTAATTGCTCCTA  
GGGGTTACTTCAAATACGAAGTGGGAAAAGCTCAATAATGAGATCAGATGCACCCATTGGCAGATGTAA  
GTCTGAATGCATCACTCCAAATGGAAGCATTCCAATGACAAACCGTTCCAAAATGTAAACAGGATCACA  
TACGGGGCCTGTCCCAGATATGTTAAGCAAAGCACCTTGAATTTGGCAACAGGAATGCGAAATGTACCAG  
AGAAAACAACAGAGGCATATTTGGTGAATAGCGGGTTTCATAGAAAATGGATGGGAGGGGAATGGTGGGA  
TGGTTGGTACGGTTTCAGGCATCAAATCTGAGGGAAGAGGACAAGCAGCAGATCTCAAAGCACTCAA  
GCAGCAATCGATCAAATCAATGGGAAGCTGAATCGATTGATCGGAAAAACCAACGAGAAATCCATCAGA  
TTGAAAAAGAATCTCAGAAGTAGAAGGAAGAGTTCAAGACCTTGAGAAATATGTTGAGGACACTAAAAT  
AGATCTCTGGTCATACAACGCTGAGCTTCTTGTTCCTGGGAGAACACATACGATTGACCTAACTGAC  
TCAGAAATGAACAACCTGTTTGA AAAAACAAGAAGCAACTGAGGGAAAAATGCTGAGGATATGGGAAATG  
GTTGTTTTCAAAATATACCACAATGTGACAATGCCTGCATAGGATCAATAAGAAATGAACTTATGACCA  
CAATGTGTACAGGGATGAAGCATTAAACAACCGGTTCCAGATCAAGGGAGTTGAGCTGAAATCAGGGTAC  
AAAGATTGGATCCTATGGATTTCTTTGCCATGTCATGTTTTTGTCTTGTATTGCTTTGTTGGGGTTCA  
TCATGTGGCCTGCCAAAAGGGCAACATTAGATGCAACATTTGCATTTGAGTGCATTAATAAAAACACC  
CTTGTCTACT

>BEL28112022\_H3N2\_HA\_4

AGCAAAGCAGGGGATAATCTATTAACCATGAAGACTATCATTGCTTTGAGCAACATTCTATGCTTGT  
TTTTGCTCAAAAAATACCTGGAACGACAATAGCACGGCAACGCTGTGCCTTGGGATACCATGCAGTACCA  
AACGGAAACGATAGTGAAAACAATCACAATGACCGAATTGAAGTTACTAATGCTACTGAGTTGGTTCAGA  
ATTCATCAATAGTAAAAATATGCGACAGTCCCTCATCAGATCCTTGATGGAGGAACTGCACACTAATAGA  
TGCTCTATTGGGGGACCCTCAGTGTGACGGCGTTCAAATAAGGAATGGGACCTTTTGTGAAACGAAGC  
AGAGCCAACAGCAACTGTACCCTTATGATGTGCCGATTATGCCTCCCTTAGTCACTAGTTGCCTCAT  
CCGGCACACTGGAGTTTAAAAATGAAAGCTTCAATTGGACTGGAGTCAAACAAAACGGAGCAAGTTCTGC  
GTGCAAAGGGGATCTAGTAGTAGTTTTTTAGTAGATTAATTTGGTTGACCCACTTAAACAACATATAT  
CCAGCACAGAACGTGACTATGCCAAAACAGGAACAATTTGACAAATTGACATTTGGGGGGTTCAACCACC

CGGATACGGACAAGAACCAAAATCTCCCTGTTCCGCCAATCATCAGGAAGAATCACAGTATCTACCAAAAAG  
AAGCCAAACAAGCTGTAATCCCAAAATATCGGATCTAGACCCAGAATAAGGGACATTCCTAGCAGAATAAGC  
ATCTATTGGACAATAGTAAAACCGGGAGACATACTTTTGATTAACAGCAGACGGGAATCTAATTGCTCCTA  
GGGGTTACTTCAAATACGAAATGGGAAAAGCTCAATAATGAGATCAGATGCACCCATTGGCCAAATGCAA  
GTCGTAATGCATCCTCCAAATGGAAGCATTCCCAATGACAAAACCGTTCCAAAATGTAAACAGGATCACA  
TACGGGGCCTGTCCAGATATGTTAAGCAAAGCACCCCTGAAATTGGCAACAGGAATGCGAAATGTACCAG  
AGAAACAAACCAGAGGCATATTTGGCGCAATAGCGGTTTTCATAGAAAATGGATGGGAGGGAATGGTGGGA  
TGGTTGGTACGGTTTTAGGCATCAAATTTCTGAGGGAAGAGGACAAGCAGCAGATCTCAAAGCACTCAA  
GCAGCAATCGATCAAATCAATGGGAAGCTGAATCGATTGATCGGAAAAACCAACGAGAAATCCATCAGA  
TTGAAAAAGAATTCTCAGAGGTAGAAGGAAGAGTTCAAGACCTTGAGAAAATATGTTGAGGACACTAAAAT  
AGATCTCTGGTCATACAACGCGGAGCTTCTTGTTCCTGGGAGAACCAACATACGATTGACCTAACTGAC  
TCAGAAATGAACAACTGTTTAAAAAACAAGAAGCAACTGAGGGAAAATGCTGAGGATATGGGAAATG  
GTTGTTTCAAATATACCACAATGTGACAATGCCTGCATAGGATCAATAAGAAATGAAACTTATGACCA  
CAATGTGTACAGGGATGAAGCATTAAACAACCGGTTCCAGATCAAGGGAGTTGAGCTGAAGTCAGGGTAC  
AAAGATTGGATCCTATGGATTTCCCTTGGCATGTCATGTTTTTGTCTTGTATTGCTTTGTTGGGGTTCA  
TCATGTGGCCTGCCAAAAGGGCAACATTAGATGCAACATTTGCATTTGAGTGCATTAATAAAAACACC  
CTTGTTTCTACT >BEL10102022\_H1N1\_NA\_6  
ATGAATCCAAACAAAAGATAATAACCATTTGGTCTGTTTGTATGACAATTGGAACGGCTAACTTAATAT  
TACAAATTGGAAACATAATCTCAATATGGGTTAGCCACTCAATTCAAATTGGAAATCAAAGCCAGATTGA  
AACATGCAATAAAAGCGTCATTACTTATGAAAACAACACTTGGGTAATCAGACATTTGTTAACATCAGC  
AACACTAACTCTGCTGCTAGACAGTCAGTGGCTTCCGTGAAATTAGCGGGCAATTCCTCTCTGCCCTG  
TTAGTGATGGGCTATATACAGTAAAGACAACAGTGAAGAATCGTTCCAAGGGGGATGTTTTGTCAT  
AAGGGAACCATTCATATCATGCTCCCTTGGAAATGCAGAACCTTCTTCTGACTCAAGGGGCTTTGCTA  
AATGACAAACATTCCAATGGAACAATCAAAGACAGAAGCCCATATCGAACCTAATGAGCTGTCCATTG  
GTGAAGTTCCTCTCCATACTCAAGATTTGAGTCAGTCGCTTGGTCAGCAAGTGTCTGTCATGATGG  
CACCAATTGGCTAACAAATTTCTGGCCAGACAGTGGGGCAGTGGCTGTGTTAAAATACAATGGC  
ATAATAACAGACACTATCAAGAGTTGGAGGAACAAGATATTGAGAACACAAGAGTCTGAATGTGATGTG  
TAAATGGTCTTCTGCTTTACCATAATGACTGATGGACCAAGTATGGACAGGCCTCATACAAAATCTTCAG  
AATAGAGAAGGAAAAGATAATCAAATCAGTCGAAATGAAGGCCCTAATTATCACTATGAAGAATGCTCC  
TGTTACCCTGATTCTAGTGAATCAGATGTGTGTGCAGGGATAATTGGCATGGCTCGAATCGACCTTGGG  
TGTCTTTCAACCAGAATCTGGAATATCAGATGGGATACATATGCAGTGGGGTTTTCGGAGACAATCCACG  
CCCTAATGATAAGACAGGCAGTTGTGGTCCAGTATTGTCTAATGGAGCAAATGGGGTAAAAGGATTTTCA  
TTCAAATACGGCAATGGTGTGGATAGGGAGAACCTAAGAGCATTAGTTCAAAGAAAAGTTTTGAGATGA  
TTTGGGATCCGAATGGATGGACTGGGACTGACAATAAATCTCAAAAAGCAAGATATTGTAGGGATAAA  
TGAGTGGTCAGGGTATAGCGGGAGTTTTGTTTCCAGATCCAGAACTAACAGGGCTGAATTGTATAAGACCT  
TGCTTCTGGGTTGAACTAATAAGAGGACGACCCGAAGAGAACACGATCTGGACTAGCGGGAGCAGCATAT  
CCTTTTGTGGTGTAGACAGTGACATTTGGGTTGGTCTTGGCCAGACGGTGTGAGTTGCCATTCACCAT  
TGACAATTAA >BEL24102022\_H1N1\_NA\_6  
ATGAATCCAAACAAAAGATAATAACCATTTGGTCTATTTGTATGACAATTGGAACGGCTAACTTAATAT  
TACAAATTGGAAACATAATCTCAATATGGGTTAGCCACTCAATTCAAATTGGAAATCAAAGCCAGATTGA  
AACATGCGATAAAAGCGTCATTACTTATGAAAACAACACTTGGGTAATCAGACATTTGTTAACATCAGC  
AACACTAACTCTGCTGCTAGACAGTCAGTGGCTTCCGTGAAATTAGCGGGCAATTCCTCTCTGCCCTG  
TTAGTGATGGGCTATATACAGTAAAGACAACAGTGAAGAATCGTTCCAAGGGGGATGTTTTGTCAT  
AAGGGAACCATTCATATCATGCTTCCCTTGGAAATGCAGAACCTTCTTCTGACTCAAGGGGCTTTGCTA  
AATGACAAACATTCCAATGGAACAATAAAGACAGAAGCCCATATCGAACCTAATGAGCTGTCTATTG  
GTGAAGTTCCTCTCCATACTCAAGATTTGAGTCAGTCGCTTGGTCAGCAAGTGTCTGTCATGATGG

CACCAATTGGCTAACAAATTGGAATTTCTGGCCCAGACAGTGGGGCAGTGGCTGTGTTAAAATACAATGGC  
ATAATAACAGACACTATCAAGAGTTGGAGGAACAAGATATTGAGAACACAAGAGTCTGAATGTGCATGTG  
TAAATGGTTCTTGCTTTACCATAATGACCCGATGGACCAAGTGATGGACAGGCCTCATACAAAATCTTCAG  
AATAGAGAAGGGAAAAGATAATCAAATCAGTCGAAATGAAGGCCCTAATTATCACTATGAAGAATGCTCC  
TGTTACCCTGATTCTAGTGAATCACATGTGTGTGCAGGGATAATTGGCATGGCTCGAATCGACCTTGGG  
TGTCTTTCAACCAGAATCTGGAATATCAGATGGGATACATATGCAGTGGGGTTTTCGGAGACAATCCACG  
CCCTAATGATAAGACAGGCAGTTGTGGTCCAGTATCGTCTAATGGAGCAAATGGGGTAAAAGGATTTCA  
TTCAAATACGGCAATGGTGTGGATAGGGAGAACTAAGAGCATTAGTTCAAGAAAAGGTTTTGAGATGA  
TTTGGGATCCGAATGGATGGACTGGGACTGACAATAAATCTCAAAAAAGCAAGATATTGTAGGGATAAA  
TGAGTGGTCAGGGTATAGCGGGAGTTTTGTTTCAGCATCCAGAACTAACAGGGCTGAATTGTATAAGACCT  
TGCTTCTGGGTTGAACTAATAAGAGGACGACCCGGAGAGAACACGATCTGGACTAGCGGGAGCAGCATAT  
CCTTTTGTGGTGTAGACAGTGACATTATGGGTTGGTCTTGCCAGACGGTGTGAGTTGCCATTCAACAT  
TGACAATTAA >BEL31102022\_H1N1\_NA\_6  
ATGAATCCAAACCAAAGATAATAACCATTGGTTCTGTTTGTATGACAATTGGAACGGCTAACTTAATAT  
TACAAATGGAAACATAATCTCAATATGGGTTAGCCACTCAATTCAAATTGGAAATCAAAGCCAGATTGA  
AACATGCAATAAAAAGCGTCATTACTTATGAAAACAACACTTGGGTAATCAGACATTTGTTAACATCAGC  
AACACTAATCTGCTGCTAGACAGTCAAGTGGCTCCGTGAAATTAGCGGGCAATCTTCTCTGCCCCTG  
TTAGTGGATGGGCTATATACAGTAAAGACAACAGTGAAGAATCGGTTCCAAGGGGGATGTGTTTGTCTAT  
AAGGGAACCATTCATATCATGCTCCCTTGGAAATGCAGAACCTTCTTCTGACTCAAGGGGCTTGGCTA  
AATGACAAAACATTCCAATGGAACAATTAAGACAGAAGCCATATCGAACCTAATGAGCTGTCTATTG  
GTGAAGTCCCTCTCCATACAACCTCAAGATTTGAGTCAGTCGCTTGGTCAGCAAGTGTGTCATGATGG  
CACCAATTGGCTAACAAATTGGAATTTCTGGCCCAGACAGTGGGGCAGTGGCTGTGTTAAAATACAATGGC  
ATAATAACAGACACTATCAAGAGTTGGAGGAACAAGATATTGAGAACACAAGAGTCTGAATGTGCATGTG  
TAAATGGTTCTTGCTTTACCATAATGACCCGATGGACCAAGTGATGGACAGGCCTCATACAAAATCTTCAG  
AATAGAGAAGGGAAAAGATAATCAAATCAGTCGAAATGAAGGCCCTAATTATCACTATGAAGAATGCTCC  
TGTTACCCTGATTCTAGTGAATCACATGTGTGTGCAGGGATAATTGGCATGGCTCGAATCGACCTTGGG  
TGTCTTTCAATCAGAATCTGGAATATCAGATGGGATACATATGCAGTGGGGTTTTCGGAGACAATCCACG  
CCCTAATGATAAGACAGGCAGTTGTGGTCCAGTATTGTCTAATGGAGCAAATGGGGTAAAAGGATTTCA  
TTCAAATACGGCAATGGTGTGGATAGGGAGAACTAAAAGCATTAGTTCAAGAAAAGGTTTTGAGATGA  
TTTGGGATCCGAATGGATGGACTGGGACTGACAATAAATCTCAAAAAAGCAAGATATTGTAGGGATAAA  
TGAGTGGTCAGGGTATAGCGGGAGTTTTGTTTCAGCATCCAGAACTAACAGGGCTGAATTGTATAAGACCT  
TGCTTCTGGGTTGAACTAATAAGAGGACGACCCGAAGAGAACACGATCTGGACTAGCGGGAGCAGCATAT  
CCTTTTGTGGTGTAGACAGTGACATTATGGGTTGGTCTTGCCAGACGGTGTGAGTTGCCATTCAACAT  
TGACAATTAA >CRG12092022\_H1N1\_NA\_6  
ATGAATCCAAACCAAAGATAATAACCATTGGTTCTGTTTGTATGACAATTGGAACGGCTAACTTAATAT  
TACAAATGGAAACATAATCTCAATATGGGTTAGCCACTCAATTCAAATTGGAAATCAAAGCCAGATTGA  
AACATGCAATAAAAAGCGTCATTACTTATGAAAACAACACTTGGGTAATCAGACATTTGTTAACATCAGC  
AACACTAATCTGCTGCTAGACAGTCAAGTGGCTCCGTGAAATTAGCGGGCAATCTTCTCTGCCCCTG  
TTAGTGGATGGGCTATATACAGTAAAGACAACAGTGAAGAATCGGTTCCAAGGGGGATGTGTTTGTCTAT  
AAGGGAACCATTCATATCATGCTCCTTGGAAATGCAGAACCTTCTTCTGACTCAAGGGGCTTGGCTA  
AATGACAAAACATTCCAATGGAACAGTCAAAGACAGAAGCCATATCGAACCTAATGAGCTGTCTATTG  
GTGAAGTCCCTCTCCATACAACCTCAAGATTTGAGTCAGTCGCTTGGTCAGCAAGTGTGTCATGATGG  
CACCAATTGGCTAACAAATTGGAATTTCTGGCCCAGACAGTGGGGCAGTGGCTGTGTTAAAATACAATGGC  
ATAATAACAGACACTATCAAGAGTTGGAGGAACAAGATATTGAGAACACAAGAGTCTGAATGTGCATGTG  
TAAATGGTTCTTGCTTTACCATAATGACTGATGGACCAAGTGATGGACAGGCCTCATACAAAATCTTCAG  
AATAGAGAAGGGAAAAGATAATCAAATCAGTCGAAATGAAGGCCCTAATTATCACTATGAAGAATGCTCC

TGTTACCCTGATTCTAGTGAAATCACATGTGTGTGCAGGGATAATTGGCATGGCTCGAATCGACCTTGGG  
TGCTCTTCAACCCAGAAATCTGGAATATCAGATGGGATACATATGCAGTGGGGTTTTCCGGAGACAATCCACG  
CCCTAATGATAAGACAGGCAGTTGTGGTCCAGTATTGTCTAATGGAGCAAATGGGGTAAAAGGATTTTCA  
TTCAAATACGGCAATGGTGTTTGGATAGGGAGAATAAGAGCATTAGTTCAAGAAAAGGTTTTGAGATGA  
TTTGGGATCCGAATGGATGGACTGGGACTGACAATAAATTCTCAAAAAAGCAAGATATTGTAGGGATAAA  
TGAGTGGTCAGGGTATAGCGGGAGTTTTGTTCCAGCATCCAGAATAACAGGGCTGAATTGTATAAGACCT  
TGCTTCTGGGTTGAACATAAAGAGGACGCCGAAGAGAACACGATCTGGACTAGCGGGAGCAGCATAT  
CCTTTTGTGGTGTAGACAGTGACATTATGGGTTGGTCTTGCCAGACGGTGCTGAGTTGCCATTACCCAT  
TGACAATTAA >BYM28112022\_H1N1\_NA\_6  
ATGAATCCAACCAAAAGATAATAACCATTGGTTCTGTTGTATGACAATTGGAACGGCTAACTTAATAT  
TACAAATTGGAAACATAATCTCAATATGGGTTAGCCACTCAATTCAAATTGGAAATCAAAGCCAGATTGA  
AACATGCAATAAAAAGCGTCATTACTTATGAAAACAACACTTGGGTAATCAGACATTTGTTAACATCAGC  
AACACTAACTCTGCTCTAGACAGTCAGTGGCTTCCGTGAAATAGCGGGCAATTCTTCTCTGCCCTG  
TTAGTGGATGGGCTATATACAGTAAAGACAACAGTGTAAAGAACGGTTCGAAGGGGGATGTGTTTGTAT  
AAGGGAACCATTCATATCATGCTCTCCCTTGGAAATGCAGAACCTTCTTCTGACTCAAGGGGCTTTGCTA  
AATGACAAACATTCCAATGGAAACAATTAAGACAGAAAGCCCATATCGAACCTAATGAGCTGCTCATTG  
GTGAAGTCCCTCTCCATACTCAAGATTGAGTCAGTCGCTTGGTCAGCAAGTCTGTCATGATGG  
CACCAATTGGCTAACAAATTGGAATTTCTGCCCCAGACAGTGGGGCAGTGGCTGTGTTAAAATACAATGGC  
ATAATAACAGACACTATCAAGAGTTGGAGGAACAAGATATTGAGAACACAAGAGTCTGAATGTGCATGTG  
TAAATGGTCTTGTCTTACCATAATGACCGATGGACCAAGTGTGACAGGCCTCATAAAAACTTCAG  
AATAGAGAAGGGAAAAGATAATAACATCAGTCGAAATGAAGGCCCTAATATCACTATGAAGAATGCTCC  
TGTTACCCTGATTCTAGTGAAATCACATGTGTGTGCAGGGATAATTGGCATGGCTCGAATCGACCTTGGG  
TGTCTTCAACCCAGGATCTGGAATATCAGATGGGATACATATGCAGTGGGGTTTTCCGGAGACAATCCACG  
CCCTAATGATAAGACAGGCAGTTGTGGTCCAGTATTGTCTAATGGAGCAAATGGGGTAAAAGGATTTTCA  
TTCAAATACGGCAATGGTGTTTGGATAGGGAGAATAAGAGCATTAGTTCAAGAAAAGGTTTTGAGATGA  
TTTGGGATCCGAATGGATGGACTGGGACTGACAATAAATTCTCAAAAAACAAGATATTGTAGGGATAAA  
TGAGTGGTCAGGGTATAGCGGGAGTTTTGTTCCAGCATCCAGAATAACAGGGCTGAATTGTATAAGACCT  
TGCTTCTGGGTTGAACATAAAGAGGACGCCGAAGAGAACACGATCTGGACTAGCGGGAGCAGCATAT  
CCTTTTGTGGTGTAGACAGTGACATTATGGGTTGGTCTTGCCAGACGGTGCTGAGTTGCCATTACCCAT  
TGACAATTAA >NDN12092022\_H3N2\_NA\_6  
AGCAAAAGCAGGAGTAAAGATGAATCCAATCAAAGATAATAACGATTGGCTCTGTTTCTCTACAATT  
TCCACAATATGCTTCTCATGCAAATGGCCATCCTGATACTACTGTAACATTCATTCAAGCAATATG  
AATTCAACTCCCCCAAAATAACCAAGTGATGCTGTGTGAACCAACAATAATAGAAAAGAAAACATAACAGA  
GATAGTGATTTGACCAACACCACCATAGAGAAGGAAATATGCCCAAAACCAGCAGAATACAGAAATTGG  
TCAAAACCGCAATGTGGCATTACAGGATTTGCACCTTTCTCTAAGGACAATTGATTAGGCTTTCCGCTG  
GTGGGGACATATGGGTGACAAGAGAACCGTATGTGTCATGCGATCTTGACAAGTGTATCAATTTGCCCT  
TGGACAGGGAACAACATAAATGTGCATTCAATAACACAGTACATGATAGAACCCTTATCGGACT  
CTATTGATGAATGAGTTGGGTTCCTTTCCATCTGGGGACCAAGCAAGTGTGCATAGCATGGTCCAGCT  
CAAGTTGTACAGTGGAAAAGCATGGCTGCATGTTGTATAACGGGGGATGATAAAAATGCAACTGCTAG  
CTTCATTACAATGGGAGGCTTTGATAGTGTGTTTTCATGTTCCAACGATATTCTCAGAACCCAGGAG  
TCAGAATGCGTTTGTATCAATGGAACCTGTACAGTAGTAATGACTGATGAAATGCTACAGGAAAAGCTG  
ATACTAAAATACTATTATTGAGGAGGGGAAAATCGTTCATACTAGCAAATGTGTCAGGAAAGTGTCTAGCA  
TGTGCAAGAGTGTCTTGTCTATCCTCGATATCCTGGTGCAGATGTCTGCAGAGACAACCTGAAAAGGA  
TCCAACCGGCCATCATAGATAAACAATAAAGGATCATAGCATTGTTTCCAGGATATGTGTTCTGGAC  
TTGTTGGAGACACCCAGAAAAGCGACAGCTCCAGCAGTAGCCACTGTTTGAACCCTAACAATGAAAA  
AGGTGATCATGGAGTAAAAGGCTGGGCCTTTGATGATGGAATGACGTGTGGATGGGGAGAACAATCA

>BYM28112022\_H3N2\_NA\_6

AGCAAAAGCAGGAGTAAAGATGAATCCAATCAAAAGATAATAACGATTGGCTCTGTTTCTCTCACAATT  
TCCACAATATGCTTCTTCATGCAAATGCCATCCTGATAACTACTGTAACATTGCATTTCAAGCAATATG  
AATTCAACTCCCCCAATAACCAAGTGATGCTGTGGAACCAACAATAATAGAAAGAAACATAACAGA  
GATAGTGATTTGACCAACACCACCATAGAGAAGGAAAATATGCCCAACCAGCAGAATACAGAAATTGG  
TCAAAACCGCAATGTGGCATTACAGGATTTGCACCTTTCTCTAAGGACAATTCGATTAGGCTTTCCGCTG  
GTGGGGACATCTGGGTGACAAGAGAACCTTATGTGTCATGCGATCTTGACAAGTGTATCAATTTGCCCT  
TGGACAGGGAACAACATAAACAATGTGCATTCAAATAACACAGTACGTGATAGAACCCTTATCGGACT  
CTATTGATGAATGAGTTGGGTGTTCCCTTTCCATCTGGGGACCAAGCAAGTGTGCATAGCATGGTCCAGCT  
CAAGTTGTACGATGGAAAAGCATGGCTGCATGTTTGTATAACGGGGATGATAAAAATGCAACTGCTAG  
CTTCATTTACAATGGGAGGCTTGATAGTGTGTTTTCATGGTCCAACGATATTCTCAGAACCCAGGAG  
TCAGAAATGCGTTTGATCAATGGAACCTTGTGCAGTAGTAATGACTGATGGAAATGCTACAGGAAAAGCTG  
ATACTAAAATACTATTCAATGAGGAGGGGAAAATCGTTCATACTAGCAAATTGTCAGGAAAGTCTCAGCA  
TGTCGAAGAGTGCTCTTGCTATCCTCGATATCCTGGTGCAGATGTGTCTGCAGAGACAACCTGGAAAGGA  
TCCAACCGGCCATCATAGATATAAACATAAAGGATCATAGCATGTTTCCAGGTATGTGTCTGGAC  
TTGTTGGAGACACACCAGAAAAAGCGACAGCTCCAGCAGTAGCCATTGTTGAACCTAACAATGAAAA  
AGGTGGTCATGGAGTGAAGGCTGGGCCTTTGATGATGGAATGACGTGGATGGGAGAACAAATCAAC  
GAGACGTCACGCTTAGGGTATGAAACCTTCAAAGTCGTTGAAGGCTGGTCCAACCTAAGTCCAAATTGC  
AGATAAATAGGCAAGTCATAGTTGACAGAGGCGATAGGTCCGTTATTCTGGTATTTCTCTGTTGAAGG  
CAAAAGCTGCATCAATCGGTGCTTTTATGTGGAGTTGATTAGGGGAAGAAAAGAGGAAACTGAAGTCTTG  
TGGACTTCAAACAGTATTGTTGTTTTGTGGCACCTCAGGTACATATGGAACAGGCTCATGGCCTGATG  
GGGCGAACCTCAGTCTCATGATATATAAGCTTTTGAATTTAGAAAAACC
